# Supplementary material for: Chiral Fe(ii) complex catalyzed enantioselective [1,3] O-to-C rearrangement of alkyl vinyl ethers and synthesis of chromanols and beyond
Source: PubMed Central journal article supplement — Chem Sci. 2020 Sep 7;11(37):10101–6. doi: 10.1039/d0sc04340k (PMC8162448; doi:10.1039/d0sc04340k), 2020-09-07
Supplement: SC-011-D0SC04340K-s001.pdf [file SC-011-D0SC04340K-s001.pdf]

## Chiral Fe(II) Complex Catalyzed Enantioselective [1,3] O-to-C Rearrangement of Alkyl Vinyl Ethers and Synthesis of Chromanols and Beyond

Lifeng Wang,<sup>a</sup> Pengfei Zhou,<sup>a</sup> Qianchi Lin,<sup>a</sup> Shunxi Dong,<sup>a</sup> Xiaohua Liu,<sup>\*a</sup> and Xiaoming Feng<sup>\*a</sup>

Key Laboratory of Green Chemistry & Technology, Ministry of Education, College of Chemistry, Sichuan University, Chengdu 610064, China

E-mail: [liuxh@scu.edu.cn](mailto:liuxh@scu.edu.cn), [xmfeng@scu.edu.cn](mailto:xmfeng@scu.edu.cn)

### Table of Contents

|                                                                     |     |
|---------------------------------------------------------------------|-----|
| 1. General information .....                                        | 2   |
| 2. General procedure for the synthesis of substrates .....          | 2   |
| 3. General procedure for the catalytic reactions .....              | 3   |
| 4. General procedure for the synthesis of chromanones .....         | 5   |
| 5. General procedure for the scale-up reaction .....                | 6   |
| 6. Synthetic transformation .....                                   | 6   |
| 7. The optimization of reaction conditions .....                    | 8   |
| 8. Scope limitation .....                                           | 10  |
| 9. HRMS analysis .....                                              | 11  |
| 10. Spectral characterization data .....                            | 12  |
| 11. Copies of NMR spectra for the substrates and the products ..... | 49  |
| 12. Copies of CD spectra in CH <sub>2</sub> Cl <sub>2</sub> .....   | 127 |
| 13. References .....                                                | 135 |

## 1. General information

$^1\text{H}$  NMR spectra were recorded on Bruker AMX-400 (400 MHz). Spectra were reported as follows: chemical shift ( $\delta$  ppm), multiplicity (s = singlet, d = doublet, t = triplet, q = quartet, m = multiplet), coupling constants (Hz), integration and assignment.  $^{13}\text{C}\{^1\text{H}\}$  NMR spectra were collected on Bruker AMX-400 (100 MHz) with complete proton decoupling.  $^{19}\text{F}\{^1\text{H}\}$  NMR spectra were collected on Bruker AMX-400 (376 MHz) with complete proton decoupling. Chemical shifts are reported in  $\delta$  (ppm) referenced to the residual peaks of  $\text{CDCl}_3$  ( $\delta = 7.26$ ) for  $^1\text{H}$  NMR or TMS ( $\delta = 0.00$ ) for  $^1\text{H}$  NMR and  $\text{CDCl}_3$  ( $\delta = 77.0$ ) for  $^{13}\text{C}\{^1\text{H}\}$  NMR. High resolution mass spectra (HRMS) were performed on Thermo Q-Exactive Focus (FTMS+c ESI) and data were reported as ( $m/z$ ). Enantiomeric excesses (ee) were determined by HPLC analysis using the corresponding commercial chiralpak column as stated in the experimental procedures at 25 °C. Optical rotations were reported as follows:  $[\alpha]_D^{25}$  (c g/100 mL, in solvent). IR spectra were recorded on BRUKER TENSOR II IR spectrophotometer. CD spectra were determined by Chirascan CD (DCM as the solvent) which was purchased from Applied photophysics Ltd.  $\text{CH}_2\text{Cl}_2$  was purified by MB-SPS system. All other solvents were dried using standard protocol.  $\text{Fe}(\text{OTf})_2$  was purchased from Adamas Reagent,  $\text{Fe}(\text{OTf})_3$  was purchased from Alfa Reagent, PCC (Pyridinium chlorochromate) was purchased from Adamas Reagent,  $[\text{Ir}(\text{cod})\text{Cl}]_2$  was purchased from Adamas Reagent. Salicylaldehyde and Grignard reagent were commercially available. Chromatography: Qingdao Haiyangsilica gel, HG/T2354-92, H CP. The  $N,N'$ -dioxides were prepared according to the methods reported in the literature.<sup>1</sup>

## 2. General procedure for the synthesis of substrates

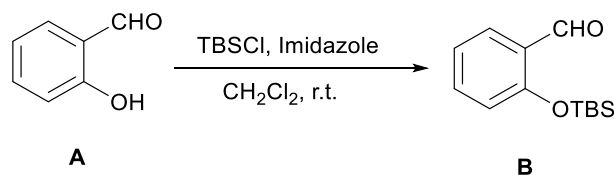

To a solution of salicylaldehyde (6.10 g, 50 mmol) and imidazole (5.10 g, 75 mmol) in  $\text{CH}_2\text{Cl}_2$  (100 mL) was added *tert*-butyldimethylsilyl chloride (11.25 g, 75 mmol), and the reaction was stirred overnight at room temperature. Saturated  $\text{NH}_4\text{Cl}$  (200 mL) was added, the two phases were separated, and the aqueous layer was extracted with  $\text{CH}_2\text{Cl}_2$  (3  $\times$  50 mL). The combined organic layers were washed with brine, dried over anhydrous  $\text{Na}_2\text{SO}_4$  and concentrated in vacuo. The residue was purified by flash chromatography on silica gel (Pet/EtOAc = 20:1) to afford the product **B** (11.11 g, 94% yield) as a pale yellow oil.

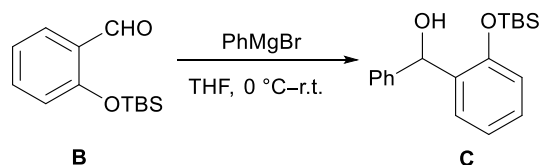

To a solution of compound **B** (3.54 g, 15 mmol) in dry THF (20 mL) at 0 °C, solution of phenyl magnesium bromide (18.0 mL, 1M in THF) was added dropwise under  $\text{N}_2$  atmosphere. The reaction was stirred overnight at room temperature. Saturated  $\text{NH}_4\text{Cl}$  (100 mL) was added, the two phases were separated, and the aqueous layer was extracted with EtOAc (3  $\times$  30 mL). The combined organic layers were dried over anhydrous  $\text{Na}_2\text{SO}_4$

and concentrated in vacuo. the residue was purified by flash chromatography on silica gel (Pet/EtOAc = 20:1) to afford the product **C** (4.0 g, 85% yield) as a colorless oil.

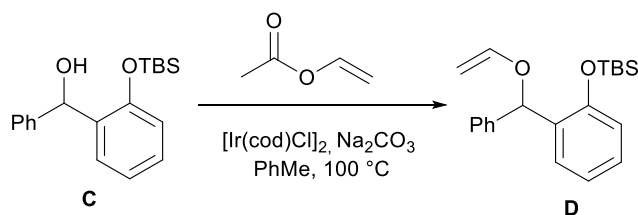

A solution of compound **C** (4.0 g, 12.73 mmol), vinyl acetate (2.19 g, 25.46 mmol),  $[\text{Ir}(\text{cod})\text{Cl}]_2$  (85 mg, 0.127 mmol) and  $\text{Na}_2\text{CO}_3$  (0.81 g, 7.64 mmol) in toluene (30 mL) was heated at 100 °C for 6 h under  $\text{N}_2$  atmosphere. After removing the solvent under vacuo, the residue was purified by flash chromatography on silica gel (Pet/EtOAc = 40:1) to afford the crude product of **D** (3.51 g) as a pale yellow oil. Vinyl ethers were prepared according to the literature procedure.<sup>2</sup>

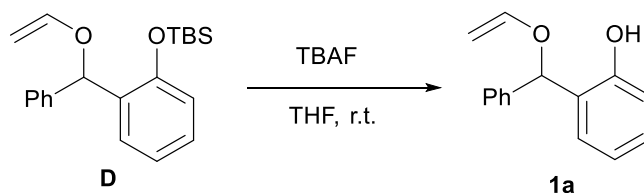

To a solution of crude compound **D** (1.36 g) in THF (10 mL), solution of TBAF (6.0 mL, 1M in THF) was added dropwise. The reaction was stirred at room temperature for 1 h. Saturated  $\text{NH}_4\text{Cl}$  (50 mL) was added, the two phases were separated, and the aqueous layer was extracted with EtOAc (3 x 20 mL). The combined organic layers were washed several times with brine to remove *tert*-butyldimethylsilyl fluoride, dried over anhydrous  $\text{Na}_2\text{SO}_4$  and concentrated in vacuo. The residue was purified by flash chromatography on silica gel (Pet/EtOAc = 20:1) to afford the product **1a** (0.86 g) as a colorless oil, the overall yield was 61% yield.

### 3. General procedure for the catalytic reactions

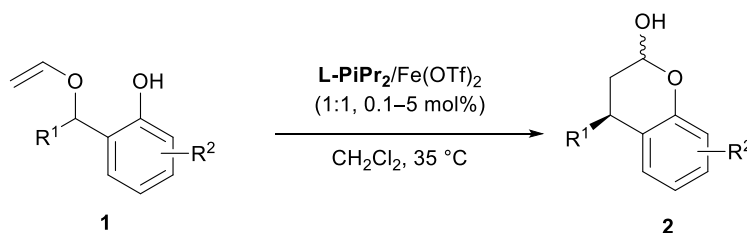

Preparation of the catalyst solution ( $5 \times 10^{-3}$  M): To a 2.0 mL volumetric flask, **L-PiPr<sub>2</sub>** (6.5 mg, 0.01 mmol),  $\text{Fe}(\text{OTf})_2$  (3.5 mg, 0.01 mmol) and  $\text{CH}_2\text{Cl}_2$  (2.0 mL) were added.

#### General Procedure A:

A dry reaction tube was charged with freshly prepared **L-PiPr<sub>2</sub>/Fe(OTf)<sub>2</sub>** catalyst solution (0.1 mol% catalyst loading; 40  $\mu\text{L}$ ,  $5 \times 10^{-3}$  M in  $\text{CH}_2\text{Cl}_2$ ), followed by the addition of  $\text{CH}_2\text{Cl}_2$  (1.6 mL). The mixture was stirred at 35 °C for 0.5 h followed by addition of the substrate solution (0.2 mmol, 400  $\mu\text{L}$ ; 0.5 M in  $\text{CH}_2\text{Cl}_2$ ). The reaction

mixture was stirred at 35 °C and detected by TLC. The residue was purified by flash chromatography on silica gel (Pet/EtOAc = 10:1 – 6:1) to afford the desired products.

**General Procedure B:**

A dry reaction tube was charged with freshly prepared **L-PiPr<sub>2</sub>**/Fe(OTf)<sub>2</sub> catalyst solution (1 mol% catalyst loading; 400μL, 5 x 10<sup>-3</sup> M in CH<sub>2</sub>Cl<sub>2</sub>), followed by the addition of CH<sub>2</sub>Cl<sub>2</sub> (1.2 mL). The mixture was stirred at 35 °C for 0.5 h followed by addition of the substrate solution (0.2 mmol; 400μL, 0.5 M in CH<sub>2</sub>Cl<sub>2</sub>). The reaction mixture was stirred at 35 °C and detected by TLC. The residue was purified by flash chromatography on silica gel (Pet/EtOAc = 10:1 – 6:1) to afford the desired products.

**General Procedure C:**

A dry reaction tube was charged with **L-PiPr<sub>2</sub>** (6.5 mg, 5 mol%) and Fe(OTf)<sub>2</sub> (3.5 mg, 5 mol%) followed by the addition of CH<sub>2</sub>Cl<sub>2</sub> (1.6 mL). The mixture was stirred at 35 °C for 0.5 h followed by addition of the substrate solution (0.2 mmol, 400μL; 0.5 M in CH<sub>2</sub>Cl<sub>2</sub>). The reaction mixture was stirred at 35 °C and detected by TLC. The residue was purified by flash chromatography on silica gel (Pet/EtOAc = 10:1 – 6:1) to afford the desired products.

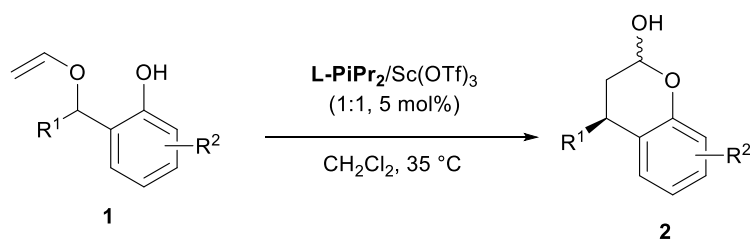

**General Procedure D:**

A dry reaction tube was charged with **L-PiPr<sub>2</sub>** (6.5 mg, 5 mol%) and Sc(OTf)<sub>3</sub> (4.9 mg, 5 mol%) followed by the addition of CH<sub>2</sub>Cl<sub>2</sub> (1.6 mL). The mixture was stirred at 35 °C for 0.5 h followed by addition of the substrate solution (0.2 mmol, 400μL; 0.5 M in CH<sub>2</sub>Cl<sub>2</sub>). The reaction mixture was stirred at 35 °C and detected by TLC. The residue was purified by flash chromatography on silica gel (Pet/EtOAc = 10:1 – 6:1) to afford the desired products.

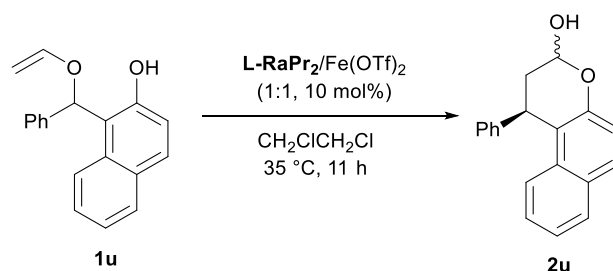

**General Procedure E:**

A dry reaction tube was charged with **L-RaPr<sub>2</sub>** (14.0 mg, 10 mol%), Fe(OTf)<sub>2</sub> (7.0 mg, 10 mol%) and CH<sub>2</sub>Cl<sub>2</sub> (1.0 mL) and the resulting solution was stirred at 35 °C for 0.5 h. After removing the solvent under vacuo, **1u** (0.2 mmol) was weighted into the tube followed by adding CH<sub>2</sub>ClCH<sub>2</sub>Cl (2.0 mL). The reaction mixture was stirred at 35 °C for 11 h. The residue was purified by flash chromatography on silica gel (Pet/EtOAc = 15:1 – 10:1) to afford the desired products.



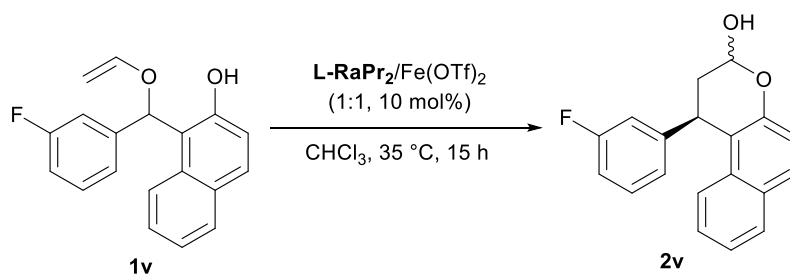

#### General Procedure F:

A dry reaction tube was charged with **L-RaPr<sub>2</sub>** (14.0 mg, 10 mol%), **Fe(OTf)<sub>2</sub>** (7.0 mg, 10 mol%) and **CH<sub>2</sub>Cl<sub>2</sub>** (1.0 mL) and the resulting solution was stirred at 35 °C for 0.5 h. After removing the solvent under vacuo, **1v** (0.2 mmol) was weighted into the tube followed by adding **CHCl<sub>3</sub>** (2.0 mL). The reaction mixture was stirred at 35 °C for 15 h. The residue was purified by flash chromatography on silica gel (Pet/EtOAc = 15:1 – 10:1) to afford the desired products.

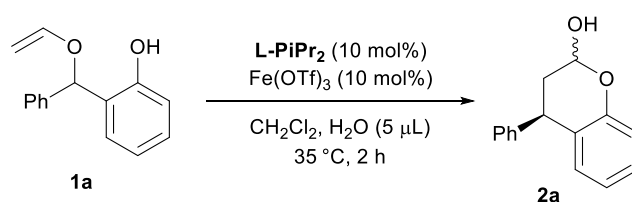

#### General Procedure G:

A dry reaction tube was charged with **L-PiPr<sub>2</sub>** (6.5 mg, 10 mol%) and **Fe(OTf)<sub>3</sub>** (5.0 mg, 10 mol%) followed by the addition of **CH<sub>2</sub>Cl<sub>2</sub>** (0.8 mL). The mixture was stirred at 35 °C for 0.5 h followed by addition of **H<sub>2</sub>O** (5  $\mu\text{L}$ ) and then continued to stir at 35 °C for 5 minute, followed by addition of the substrate solution (0.1 mmol, 200 $\mu\text{L}$ ; 0.5 M in **CH<sub>2</sub>Cl<sub>2</sub>**). The reaction mixture was stirred at 35 °C for 2 h. The residue was purified by flash chromatography on silica gel (Pet/EtOAc = 10:1 – 6:1) to afford the desired products.

## 4. General procedure for the synthesis of chromanones

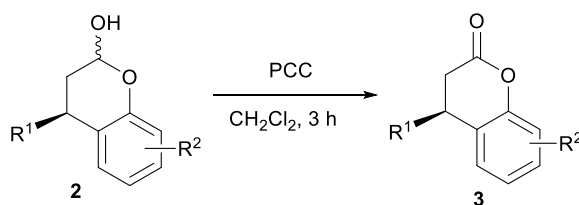

To a solution of chromanols **2** (1 equiv) in **CH<sub>2</sub>Cl<sub>2</sub>** (0.1 M) was added **PCC** (3 equiv). The reaction mixture was stirred at 35 °C for 3 h. The residue was purified by flash chromatography on silica gel (Pet/EtOAc = 10:1) to afford the chromanones **3**. Isolated yield of chromanone **3** over two steps.

## 5. General procedure for the scale-up reaction

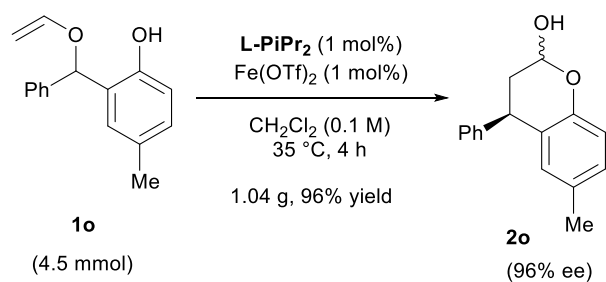

A round-bottomed flask was charged with **L-PiPr<sub>2</sub>** (29.3 mg, 0.045 mmol, 1 mol%) and **Fe(OTf)<sub>2</sub>** (15.8 mg, 0.045 mmol, 1 mol%) followed by the addition of **CH<sub>2</sub>Cl<sub>2</sub>** (36.0 mL). The mixture was stirred at 35 °C for 0.5 h followed by addition of the substrate solution (4.5 mmol, 9.0 mL; 0.5 M in **CH<sub>2</sub>Cl<sub>2</sub>**). The reaction mixture was stirred at 35 °C for 4 h. After removing the solvent under vacuo, the residue was purified by flash chromatography on silica gel (Pet/EtOAc = 10:1 – 6:1) to afford the desired product **2o** in 96% yield (1.04 g) with 96% ee.

## 6. Synthetic transformation

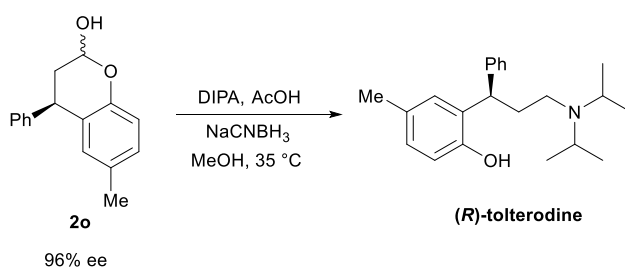

A dry reaction tube was charged with chromanol **2o** (35.8 mg, 0.149 mmol), diisopropylamine (0.053 mL, 0.372 mmol), **CH<sub>3</sub>CO<sub>2</sub>H** (0.017 mL, 0.30 mmol), **NaCNBH<sub>3</sub>** (23.4 mg, 0.372 mmol), and dry **MeOH** (0.36 mL). The reaction was stirred at 35 °C under **N<sub>2</sub>** atmosphere for 70 h. After removing the solvent under vacuo, the residue was purified by flash chromatography on silica gel (**Et<sub>3</sub>N**/**EtOAc**/**Pet** = 1:30:70) to afford **(R)-tolterodine** in 72% yield (35.1 mg).

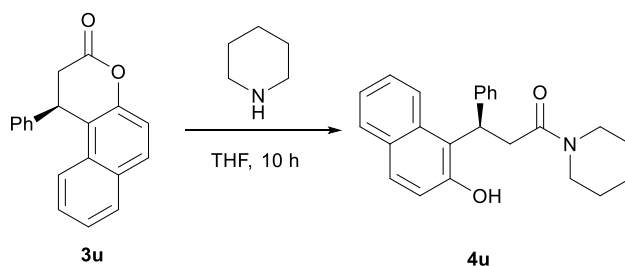

To a solution of **3u** (20.2 mg, 0.074 mmol, 95% ee) in **THF** (3.7 mL) was added piperidine (0.4 mL, 4.05 mmol). The reaction mixture was stirred at 35 °C for 10 h. After removing the solvent under vacuo, the residue was purified by flash chromatography on silica gel (**Pet**/**EtOAc** = 4:1 – 2:1) to afford the desired product **4u** in 99% yield (26.4 mg) with 95% ee.

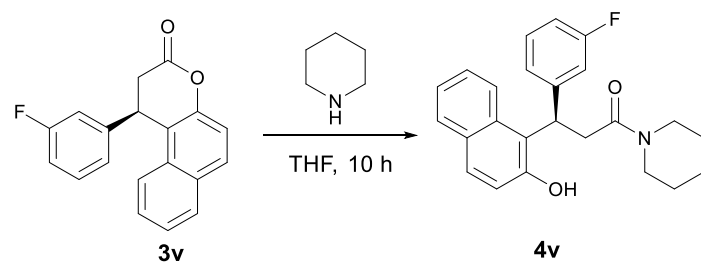

To a solution of **3v** (18.5 mg, 0.063 mmol, 95% ee) in THF (3.2 mL) was added piperidine (0.34 mL, 3.48 mmol). The reaction mixture was stirred at 35 °C for 10 h. After removing the solvent under vacuo, the residue was purified by flash chromatography on silica gel (Pet/EtOAc = 4:1 – 2:1) to afford the desired product **4v** in 94% yield (22.4 mg) with 95% ee.

## 7. The optimization of reaction conditions

**Table S1.** Screening of metal salts.

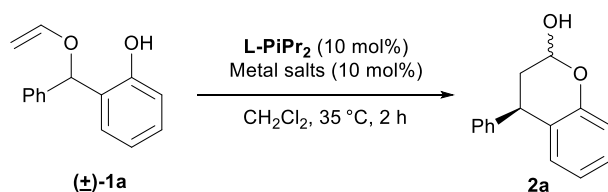

| entry <sup>a</sup> | Metal salts          | yield (%) <sup>b</sup> | ee (%) <sup>c</sup> |
|--------------------|----------------------|------------------------|---------------------|
| 1                  | Fe(OTf) <sub>2</sub> | 93                     | 98                  |
| 2                  | Sc(OTf) <sub>3</sub> | 86                     | 90                  |
| 3                  | Zn(OTf) <sub>2</sub> | 13                     | 69                  |
| 4                  | Fe(OTf) <sub>3</sub> | 19                     | 0                   |

<sup>a</sup> Unless otherwise stated, all reactions were performed with **1a** (0.1 mmol) and **L-PiPr<sub>2</sub>**/Metal salts (1/1, 10 mol%) in CH<sub>2</sub>Cl<sub>2</sub> (0.1 M) at 35 °C for 2 h. <sup>b</sup> Isolated yields. <sup>c</sup> Determined by HPLC analysis on a chiral stationary phase.

**Table S2.** Screening of ligands.

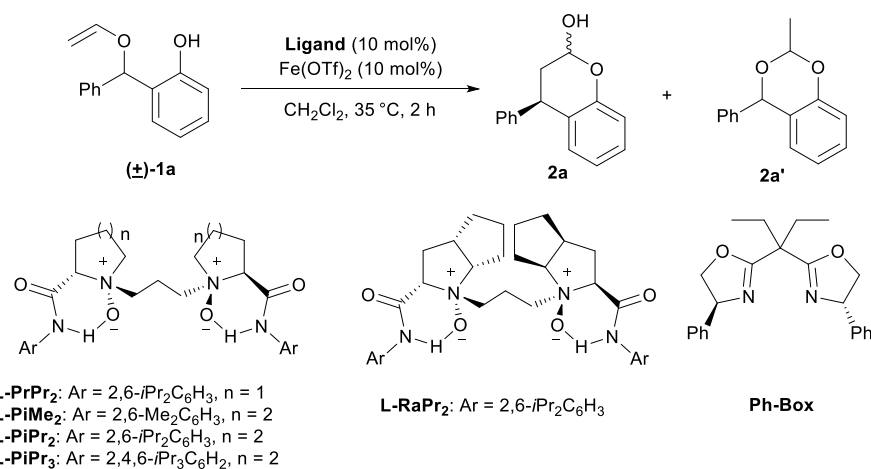

| entry <sup>a</sup> | Ligand                    | yield (%) <sup>b</sup> | ee (%) <sup>c</sup> |
|--------------------|---------------------------|------------------------|---------------------|
| 1                  | <b>L-PiPr<sub>2</sub></b> | 93                     | 98                  |
| 2                  | <b>L-RaPr<sub>2</sub></b> | 80                     | 94                  |
| 3                  | <b>L-PrPr<sub>2</sub></b> | 80                     | 91                  |
| 4                  | <b>L-PiMe<sub>2</sub></b> | 86                     | 96                  |
| 5                  | <b>L-PiPr<sub>3</sub></b> | 79                     | 96                  |
| 6                  | <b>Ph-Box</b>             | 67                     | 0                   |
| 7 <sup>d</sup>     | none                      | 29                     | 0                   |

<sup>a</sup> Unless otherwise stated, all reactions were performed with **1a** (0.1 mmol) and **Ligand**/Fe(OTf)<sub>2</sub> (1/1, 10 mol%) in CH<sub>2</sub>Cl<sub>2</sub> (0.1 M) at 35 °C for 2 h. <sup>b</sup> Isolated yields of **2a**. <sup>c</sup> Determined by HPLC analysis on a chiral stationary phase. <sup>d</sup> Isolated yield of byproduct **2a'** was 63% yield.

**Table S3.** Screening of solvent.

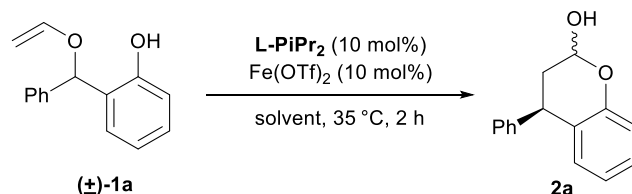

| entry <sup>a</sup> | solvent                         | yield (%) <sup>b</sup> | ee (%) <sup>c</sup> |
|--------------------|---------------------------------|------------------------|---------------------|
| 1                  | CH <sub>2</sub> Cl <sub>2</sub> | 93                     | 98                  |
| 2                  | PhCH <sub>3</sub>               | 75                     | 96                  |
| 3                  | THF                             | 90                     | 98                  |
| 4                  | EtOAc                           | 87                     | 96                  |

<sup>a</sup> Unless otherwise stated, all reactions were performed with **1a** (0.1 mmol) and **L-PiPr<sub>2</sub>**/Fe(OTf)<sub>2</sub> (1/1, 10 mol%) in solvent (0.1 M) at 35 °C for 2 h. <sup>b</sup> Isolated yields. <sup>c</sup> Determined by HPLC analysis on a chiral stationary phase.

**Table S4.** Screening of catalyst loading.

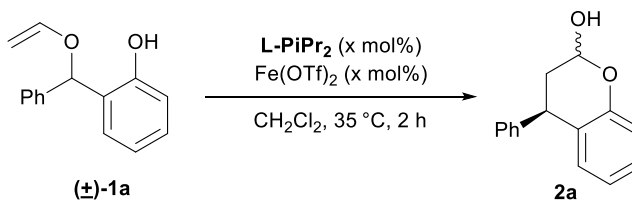

| entry <sup>a</sup> | x   | yield (%) <sup>b</sup> | ee (%) <sup>c</sup> |
|--------------------|-----|------------------------|---------------------|
| 1                  | 10  | 93                     | 98                  |
| 2                  | 5   | 93                     | 98                  |
| 3                  | 1   | 93                     | 99                  |
| 4                  | 0.1 | 84                     | 98                  |

<sup>a</sup> Unless otherwise stated, all reactions were performed with **1a** (0.1 mmol) and **L-PiPr<sub>2</sub>**/Fe(OTf)<sub>2</sub> (1/1, x mol%) in CH<sub>2</sub>Cl<sub>2</sub> (0.1 M) at 35 °C for 2 h. <sup>b</sup> Isolated yields. <sup>c</sup> Determined by HPLC analysis on a chiral stationary phase.

**Table S5.** Screening of H<sub>2</sub>O when Fe(OTf)<sub>3</sub> as metal salt.

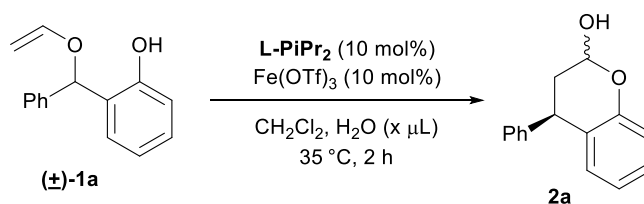

| entry <sup>a</sup> | x $\mu$ L | yield (%) <sup>b</sup> | ee (%) <sup>c</sup> |
|--------------------|-----------|------------------------|---------------------|
| 1                  | 0         | 19                     | 0                   |
| 2                  | 1         | 44                     | 92                  |
| 3                  | 5         | 71                     | 99                  |
| 4                  | 10        | 72                     | 98                  |
| 5 <sup>d</sup>     | 0         | 63                     | 98                  |

<sup>a</sup> Unless otherwise stated, all reactions were performed with **1a** (0.1 mmol), **L-PiPr<sub>2</sub>**/Fe(OTf)<sub>3</sub> (1/1, 10 mol%) and H<sub>2</sub>O (x  $\mu$ L) in CH<sub>2</sub>Cl<sub>2</sub> (0.1 M) at 35 °C for 2 h. <sup>b</sup> Isolated yields. <sup>c</sup> Determined by HPLC analysis on a chiral stationary phase. <sup>d</sup> 1 mol% catalyst loading.

**Table S6.** Screening of different counteranions with Fe(III) and HOTf.

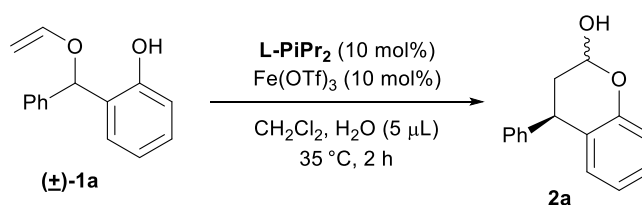

| entry <sup>a</sup> | variation from "standard conditions"                                                  | yield (%) <sup>b</sup> | ee (%) <sup>c</sup> |
|--------------------|---------------------------------------------------------------------------------------|------------------------|---------------------|
| 1                  | none                                                                                  | 71                     | 99                  |
| 2                  | Fe(ClO <sub>4</sub> ) <sub>3</sub> ·xH <sub>2</sub> O instead of Fe(OTf) <sub>3</sub> | 46                     | 98                  |
| 3                  | FePO <sub>4</sub> ·xH <sub>2</sub> O instead of Fe(OTf) <sub>3</sub>                  | N.R.                   | -                   |
| 4                  | Fe(acac) <sub>3</sub> instead of Fe(OTf) <sub>3</sub>                                 | 0                      | -                   |
| 5 <sup>d</sup>     | HOTf                                                                                  | 0                      | -                   |
| 6 <sup>e</sup>     | HOTf                                                                                  | N.R.                   | -                   |

<sup>a</sup> Unless otherwise stated, all reactions were performed with **1a** (0.1 mmol), **L-PiPr<sub>2</sub>**/Fe(OTf)<sub>3</sub> (1/1, 10 mol%) and H<sub>2</sub>O (5  $\mu$ L) in CH<sub>2</sub>Cl<sub>2</sub> (0.1 M) at 35 °C for 2 h. <sup>b</sup> Isolated yields. <sup>c</sup> Determined by HPLC analysis on a chiral stationary phase. <sup>d</sup> HOTf (10 mol%) instead of H<sub>2</sub>O (5  $\mu$ L). <sup>e</sup> HOTf (10 mol%) instead of Fe(OTf)<sub>3</sub> (10 mol%) and H<sub>2</sub>O (5  $\mu$ L).

## 8. Scope limitation

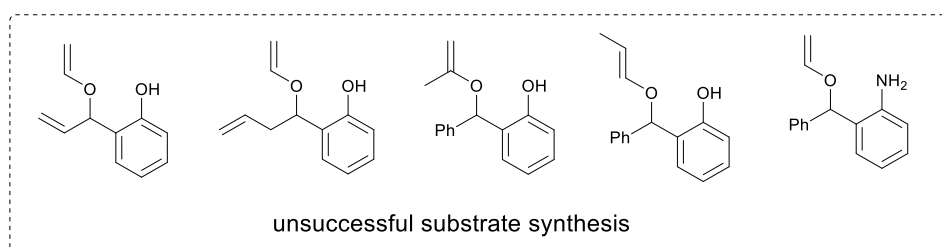

## 9. HRMS analysis

The mixture of **L-PiPr<sub>2</sub>/Fe(OTf)<sub>2</sub>** (1/1, 0.01 mmol) with D<sub>2</sub>O (50 μL) in CH<sub>2</sub>Cl<sub>2</sub>, and the mixture of **L-PiPr<sub>2</sub>/Fe(OTf)<sub>3</sub>** (1/1, 0.01 mmol) with D<sub>2</sub>O (50 μL) in CH<sub>2</sub>Cl<sub>2</sub> were monitored by HRMS (Figure S1 and Figure S2). The signals in response to the complexes of iron salt, chiral ligand and water showed that higher peaks was found from the system of Fe(OTf)<sub>2</sub> than Fe(OTf)<sub>3</sub>. It might indicate that the ferrous catalyst is a slightly sensitive to moisture than the corresponding ferric catalyst.

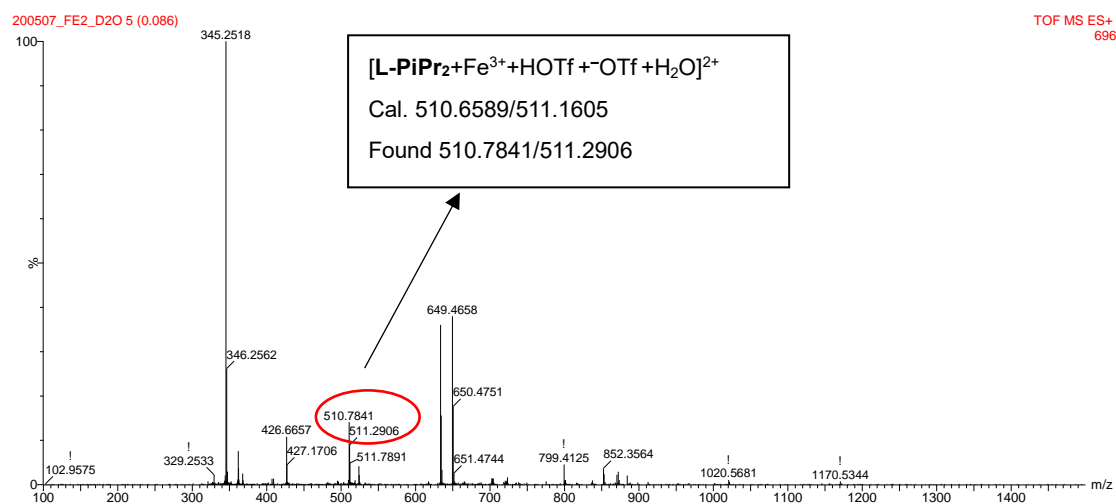

**Figure S1** HRMS spectra of **L-PiPr<sub>2</sub>/Fe(OTf)<sub>2</sub>** (1/1, 0.01 mmol) with D<sub>2</sub>O (50 μL)

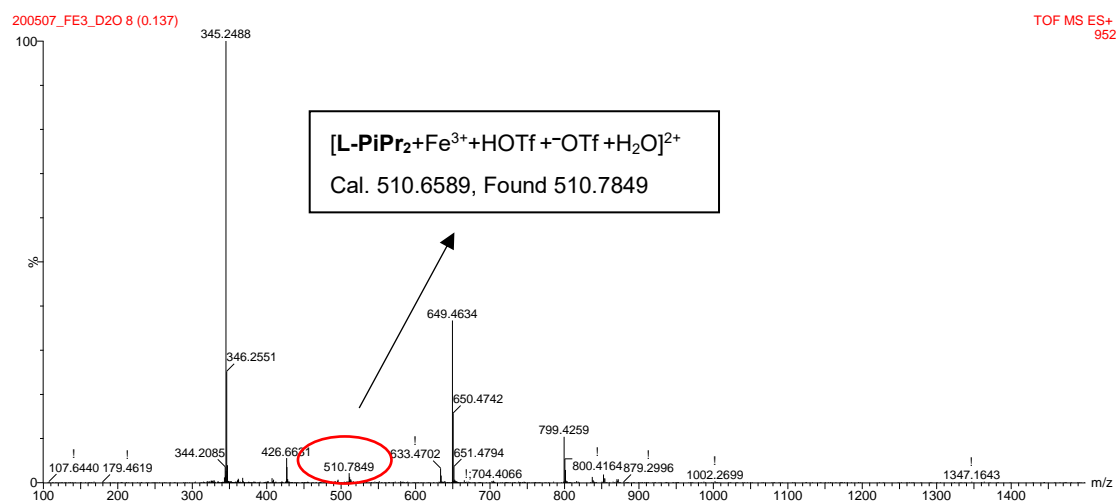

**Figure S2** HRMS spectra of **L-PiPr<sub>2</sub>/Fe(OTf)<sub>3</sub>** (1/1, 0.01 mmol) with D<sub>2</sub>O (50 μL)

## 10. Spectral characterization data

### 2-(Phenyl(vinyloxy)methyl)phenol (1a)

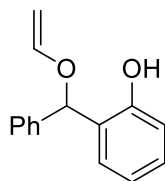

Colorless oil, 61% yield;  $^1\text{H NMR}$  (400 MHz,  $\text{CDCl}_3$ )  $\delta$  7.38 – 7.23 (m, 5H), 7.20 – 7.15 (m, 1H), 7.10 – 7.05 (m, 1H), 6.92 – 6.81 (m, 2H), 6.59 (s, 1H), 6.45 (dd,  $J = 14.1, 6.6$  Hz, 1H), 6.03 (s, 1H), 4.50 (dd,  $J = 14.1, 2.1$  Hz, 1H), 4.16 (dd,  $J = 6.6, 2.1$  Hz, 1H).  $^{13}\text{C}\{^1\text{H}\}$  NMR (100 MHz,  $\text{CDCl}_3$ )  $\delta$  154.2, 149.5, 139.2, 129.5, 128.5, 128.46, 128.1, 126.9, 125.3, 120.4, 117.0, 91.8, 82.0. IR (film):  $\nu$  ( $\text{cm}^{-1}$ ) 3422, 3032, 1637, 1616, 1487, 1454, 1231, 1166, 1094, 1043, 939, 835, 751, 697. HRMS (FTMS+c ESI) calcd for  $[\text{C}_{15}\text{H}_{14}\text{O}_2+\text{Na}^+]$ : 249.0886, found 249.0887.

### 2-(*o*-Tolyl(vinyloxy)methyl)phenol (1b)

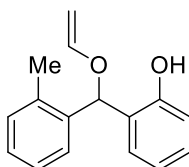

Colorless oil, 53% yield;  $^1\text{H NMR}$  (400 MHz,  $\text{CDCl}_3$ )  $\delta$  7.15 – 7.05 (m, 5H), 6.83 – 6.71 (m, 3H), 6.57 (s, 1H), 6.34 (dd,  $J = 14.1, 6.6$  Hz, 1H), 6.13 (s, 1H), 4.37 (dd,  $J = 14.1, 2.1$  Hz, 1H), 4.06 (dd,  $J = 6.6, 2.1$  Hz, 1H), 2.23 (s, 3H).  $^{13}\text{C}\{^1\text{H}\}$  NMR (100 MHz,  $\text{CDCl}_3$ )  $\delta$  154.8, 149.6, 136.8, 136.5, 130.7, 129.6, 128.6, 128.4, 127.7, 126.1, 124.2, 120.4, 116.7, 91.6, 79.2, 19.2. IR (film):  $\nu$  ( $\text{cm}^{-1}$ ) 3424, 3026, 1612, 1487, 1457, 1281, 1233, 1094, 1040, 942, 818, 753. HRMS (FTMS+c ESI) calcd for  $[\text{C}_{16}\text{H}_{16}\text{O}_2+\text{Na}^+]$ : 263.1043, found 263.1040.

### 2-(*m*-Tolyl(vinyloxy)methyl)phenol (1c)

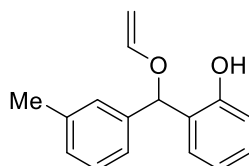

Pale yellow oil, 11% yield;  $^1\text{H NMR}$  (400 MHz,  $\text{CDCl}_3$ )  $\delta$  7.25 – 7.07 (m, 6H), 6.92 – 6.87 (m, 2H), 6.67 – 6.59 (m, 1H), 6.47 (dd,  $J = 14.0, 6.6$  Hz, 1H), 6.00 (s, 1H), 4.52 (dd,  $J = 14.0, 2.1$  Hz, 1H), 4.19 (dd,  $J = 6.6, 2.1$  Hz, 1H), 2.34 (s, 3H).  $^{13}\text{C}\{^1\text{H}\}$  NMR (100 MHz,  $\text{CDCl}_3$ )  $\delta$  154.3, 149.5, 139.1, 138.3, 129.5, 129.0, 128.5, 128.5, 127.6, 125.3, 124.0, 120.3, 117.04, 91.8, 82.4, 21.5. IR (film):  $\nu$  ( $\text{cm}^{-1}$ ) 3411, 2920, 1613, 1487, 1455, 1322, 1283, 1228, 1159, 1040, 943, 821, 753, 698. HRMS (FTMS+c ESI) calcd for  $[\text{C}_{16}\text{H}_{16}\text{O}_2+\text{Na}^+]$ : 263.1043, found 263.1044.

### 2-(3-Fluorophenyl(vinyloxy)methyl)phenol (1d)

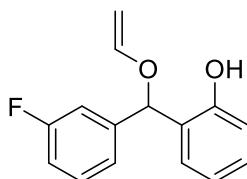



Pale yellow oil, 52% yield;  $^1\text{H}$  NMR (400 MHz,  $\text{CDCl}_3$ )  $\delta$  7.21 – 7.12 (m, 1H), 7.10 – 7.05 (m, 1H), 7.05 – 6.95 (m, 3H), 6.88 – 6.76 (m, 2H), 6.74 – 6.69 (m, 1H), 6.39 – 6.29 (m, 2H), 5.94 (s, 1H), 4.38 (dd,  $J = 14.1, 2.2$  Hz, 1H), 4.07 (dd,  $J = 6.6, 2.2$  Hz, 1H).  $^{13}\text{C}\{^1\text{H}\}$  NMR (100 MHz,  $\text{CDCl}_3$ )  $\delta$  162.8 (d,  $J = 244.8$  Hz), 153.9, 149.4, 142.2 (d,  $J = 6.9$  Hz), 130.0 (d,  $J = 8.1$  Hz), 129.7, 128.3, 125.2, 122.4 (d,  $J = 2.9$  Hz), 120.6, 116.8, 114.9 (d,  $J = 21.0$  Hz), 113.8 (d,  $J = 22.4$  Hz), 91.8, 80.3.  $^{19}\text{F}\{^1\text{H}\}$  NMR (376 MHz,  $\text{CDCl}_3$ )  $\delta$  -112.37. IR (film):  $\nu$  ( $\text{cm}^{-1}$ ) 3411, 3063, 1619, 1591, 1516, 1485, 1442, 1400, 1261, 1217, 1152, 1033, 941, 815, 782, 744, 684. HRMS (FTMS+c ESI) calcd for  $[\text{C}_{15}\text{H}_{13}\text{FO}_2+\text{Na}^+]$ : 267.0792, found 267.0798.

#### 2-(*p*-Tolyl(vinyloxy)methyl)phenol (1e)

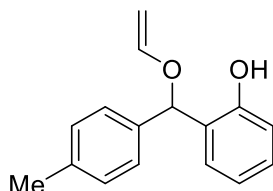

Pale yellow oil, 18% yield;  $^1\text{H}$  NMR (400 MHz,  $\text{CDCl}_3$ )  $\delta$  7.17 – 7.12 (m, 2H), 7.07 – 7.01 (m, 3H), 7.00 – 6.95 (m, 1H), 6.79 – 6.72 (m, 2H), 6.61 (s, 1H), 6.34 (dd,  $J = 14.1, 6.6$  Hz, 1H), 5.91 (s, 1H), 4.39 (dd,  $J = 14.1, 2.1$  Hz, 1H), 4.05 (dd,  $J = 6.6, 2.1$  Hz, 1H), 2.20 (s, 3H).  $^{13}\text{C}\{^1\text{H}\}$  NMR (100 MHz,  $\text{CDCl}_3$ )  $\delta$  154.2, 149.5, 137.8, 136.3, 129.3, 129.2, 128.3, 126.9, 125.5, 120.3, 116.9, 91.6, 81.8, 21.1. IR (film):  $\nu$  ( $\text{cm}^{-1}$ ) 3423, 3028, 1637, 1617, 1511, 1487, 1455, 1321, 1286, 1230, 1168, 1093, 1042, 942, 822, 753. HRMS (FTMS+c ESI) calcd for  $[\text{C}_{16}\text{H}_{16}\text{O}_2+\text{Na}^+]$ : 263.1043, found 263.1036.

#### 2-((4-Fluorophenyl)(vinyloxy)methyl)phenol (1f)

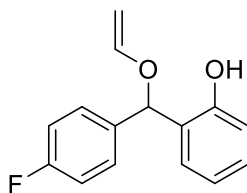

Pale yellow oil, 48% yield;  $^1\text{H}$  NMR (400 MHz,  $\text{CDCl}_3$ )  $\delta$  7.35 – 7.27 (m, 2H), 7.23 – 7.18 (m, 1H), 7.11 – 7.07 (m, 1H), 7.04 – 6.98 (m, 2H), 6.92 – 6.84 (m, 2H), 6.50 – 6.36 (m, 2H), 6.02 (s, 1H), 4.49 (dd,  $J = 14.1, 2.2$  Hz, 1H), 4.18 (dd,  $J = 6.6, 2.2$  Hz, 1H).  $^{13}\text{C}\{^1\text{H}\}$  NMR (100 MHz,  $\text{CDCl}_3$ )  $\delta$  162.4 (d,  $J = 245.4$  Hz), 154.1, 149.4, 135.2 (d,  $J = 3.1$  Hz), 129.7, 128.8 (d,  $J = 8.2$  Hz), 128.3, 125.2, 120.5, 117.0, 115.4 (d,  $J = 21.5$  Hz), 91.9, 81.1.  $^{19}\text{F}\{^1\text{H}\}$  NMR (376 MHz,  $\text{CDCl}_3$ )  $\delta$  -113.95. IR (film):  $\nu$  ( $\text{cm}^{-1}$ ) 3442, 3044, 1639, 1605, 1509, 1457, 1322, 1277, 1225, 1157, 1099, 1045, 943, 832, 755. HRMS (FTMS+c ESI) calcd for  $[\text{C}_{15}\text{H}_{13}\text{FO}_2+\text{Na}^+]$ : 267.0792, found 267.0799.

#### 2-((4-Chlorophenyl)(vinyloxy)methyl)phenol (1g)

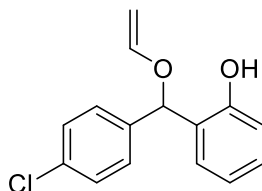

Pale yellow oil, 56% yield;  $^1\text{H}$  NMR (400 MHz,  $\text{CDCl}_3$ )  $\delta$  7.19 – 7.13 (m, 4H), 7.06 – 7.00 (m, 2H), 6.81 – 6.75 (m, 1H), 6.72 – 6.68 (m, 1H), 6.43 (s, 1H), 6.32 (dd,  $J = 14.1, 6.6$  Hz, 1H), 5.93 (s, 1H), 4.37 (dd,  $J = 14.1, 2.2$  Hz, 1H), 4.06 (dd,  $J = 6.6, 2.2$  Hz, 1H).  $^{13}\text{C}\{^1\text{H}\}$  NMR (100 MHz,  $\text{CDCl}_3$ )  $\delta$  153.7, 149.4, 138.1, 133.7, 129.5, 128.6, 128.2, 128.2, 125.3, 120.6, 116.7, 91.7, 80.2. IR (film):  $\nu$  ( $\text{cm}^{-1}$ ) 3426, 3041, 1639, 1618, 1489, 1456, 1403, 1322, 1284, 1230, 1166, 1090, 1045, 1013, 942, 823, 754. HRMS (FTMS+c ESI) calcd for

[C<sub>15</sub>H<sub>13</sub><sup>35</sup>ClO<sub>2</sub>+Na<sup>+</sup>]: 283.0496, found 283.0490; HRMS (FTMS+c ESI) calcd for [C<sub>15</sub>H<sub>13</sub><sup>37</sup>ClO<sub>2</sub>+Na<sup>+</sup>]: 285.0467, found 285.0462.

### 2-(1-(Vinylloxy)ethyl)phenol (1h)

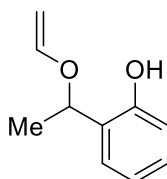

Pale yellow oil, 48% yield; <sup>1</sup>H NMR (400 MHz, CDCl<sub>3</sub>) δ 7.24 – 7.15 (m, 1H), 7.12 – 7.05 (m, 1H), 6.93 – 6.84 (m, 2H), 6.83 – 6.76 (m, 1H), 6.36 (dd, *J* = 14.1, 6.6 Hz, 1H), 5.09 (q, *J* = 6.6 Hz, 1H), 4.45 (dd, *J* = 14.1, 2.0 Hz, 1H), 4.14 (dd, *J* = 6.6, 2.1 Hz, 1H), 1.60 (d, *J* = 6.6 Hz, 3H). <sup>13</sup>C{<sup>1</sup>H} NMR (100 MHz, CDCl<sub>3</sub>) δ 154.1, 149.3, 129.1, 127.1, 126.7, 120.3, 116.9, 91.2, 78.0, 21.5. IR (film): ν (cm<sup>-1</sup>) 3422, 2979, 1617, 1587, 1491, 1451, 1345, 1289, 1229, 1172, 1119, 1068, 1018, 961, 826, 751, 624, 568. HRMS (FTMS+c ESI) calcd for [C<sub>10</sub>H<sub>12</sub>O<sub>2</sub>+Na<sup>+</sup>]: 187.0730, found 187.0733.

### 2-(1-(Vinylloxy)propyl)phenol (1i)

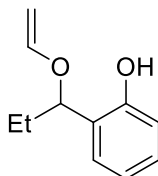

Yellow oil, 41% yield; <sup>1</sup>H NMR (400 MHz, CDCl<sub>3</sub>) δ 7.24 – 7.12 (m, 1H), 7.09 – 6.97 (m, 1H), 6.97 – 6.82 (m, 2H), 6.81 (s, 1H), 6.37 (dd, *J* = 14.1, 6.6 Hz, 1H), 4.79 (t, *J* = 6.9 Hz, 1H), 4.44 (dd, *J* = 14.1, 2.1 Hz, 1H), 4.12 (dd, *J* = 6.6, 2.1 Hz, 1H), 2.08 – 1.95 (m, 1H), 1.93 – 1.79 (m, 1H), 0.96 (t, *J* = 7.4 Hz, 3H). <sup>13</sup>C{<sup>1</sup>H} NMR (100 MHz, CDCl<sub>3</sub>) δ 154.4, 149.7, 129.1, 127.9, 125.3, 120.0, 116.9, 91.1, 83.9, 28.6, 10.1. IR (film): ν (cm<sup>-1</sup>) 3432, 2931, 1618, 1491, 1455, 1350, 1228, 1172, 1082, 1039, 982, 835, 753. HRMS (FTMS+c ESI) calcd for [C<sub>11</sub>H<sub>14</sub>O<sub>2</sub>+Na<sup>+</sup>]: 201.0886, found 201.0888.

### 2-(Cyclopropyl(vinylloxy)methyl)phenol (1j)

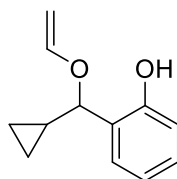

Yellow oil, 4% yield; <sup>1</sup>H NMR (400 MHz, CDCl<sub>3</sub>) δ 7.21 – 7.14 (m, 1H), 7.08 – 6.99 (m, 1H), 6.93 – 6.82 (m, 3H), 6.34 (dd, *J* = 14.0, 6.5 Hz, 1H), 4.50 – 4.28 (m, 2H), 4.09 (dd, *J* = 6.5, 2.0 Hz, 1H), 1.43 – 1.34 (m, 1H), 0.69 – 0.61 (m, 1H), 0.56 – 0.48 (m, 1H), 0.45 – 0.31 (m, 2H). <sup>13</sup>C{<sup>1</sup>H} NMR (100 MHz, CDCl<sub>3</sub>) δ 154.4, 149.4, 129.3, 128.0, 124.5, 120.0, 116.8, 91.3, 85.9, 15.6, 3.9, 2.5. IR (film): ν (cm<sup>-1</sup>) 3429, 2922, 2855, 1635, 1619, 1589, 1488, 1457, 1336, 1234, 1175, 1028, 975, 828, 754. HRMS (FTMS+c ESI) calcd for [C<sub>12</sub>H<sub>14</sub>O<sub>2</sub>+Na<sup>+</sup>]: 213.0886, found 213.0886.

### 2-(Cyclohexyl(vinylloxy)methyl)phenol (1k)

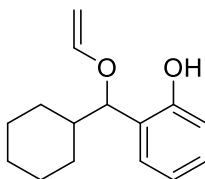

Pale yellow oil, 15% yield;  $^1\text{H NMR}$  (400 MHz,  $\text{CDCl}_3$ )  $\delta$  7.23 – 7.13 (m, 1H), 7.00 – 6.93 (m, 1H), 6.92 – 6.78 (m, 3H), 6.34 (dd,  $J = 14.0, 6.5$  Hz, 1H), 4.52 (d,  $J = 7.9$  Hz, 1H), 4.42 (dd,  $J = 14.0, 2.0$  Hz, 1H), 4.09 (dd,  $J = 6.5, 2.1$  Hz, 1H), 2.10 – 2.02 (m, 1H), 1.91 – 1.81 (m, 1H), 1.81 – 1.74 (m, 1H), 1.71 – 1.58 (m, 2H), 1.43 – 1.35 (m, 1H), 1.30 – 0.87 (m, 5H).  $^{13}\text{C}\{^1\text{H}\}$  NMR (100 MHz,  $\text{CDCl}_3$ )  $\delta$  154.7, 150.1, 129.1, 128.9, 124.0, 119.6, 117.0, 91.0, 88.0, 42.5, 29.3, 29.3, 26.2, 25.9, 25.8. IR (film):  $\nu(\text{cm}^{-1})$  3448, 2924, 2852, 1637, 1617, 1588, 1488, 1452, 1347, 1230, 1170, 1083, 1027, 988, 941, 880, 835, 753. HRMS (FTMS+c ESI) calcd for  $[\text{C}_{15}\text{H}_{20}\text{O}_2+\text{Na}^+]$ : 255.1356, found 255.1353.

### 2-Methoxy-6-(phenyl(vinyloxy)methyl)phenol (1l)

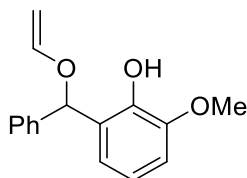

Yellow oil, 22% yield;  $^1\text{H NMR}$  (400 MHz,  $\text{CDCl}_3$ )  $\delta$  7.61 – 7.52 (m, 2H), 7.46 – 7.37 (m, 2H), 7.37 – 7.29 (m, 1H), 7.11 (dd,  $J = 7.9, 1.1$  Hz, 1H), 6.94 (t,  $J = 8.0$  Hz, 1H), 6.83 (dd,  $J = 8.0, 1.3$  Hz, 1H), 6.60 (dd,  $J = 14.2, 6.7$  Hz, 1H), 6.43 (s, 1H), 6.06 (s, 1H), 4.51 (dd,  $J = 14.2, 1.8$  Hz, 1H), 4.17 (dd,  $J = 6.7, 1.8$  Hz, 1H), 3.88 (s, 3H).  $^{13}\text{C}\{^1\text{H}\}$  NMR (100 MHz,  $\text{CDCl}_3$ )  $\delta$  150.4, 146.2, 142.6, 140.7, 128.2, 127.4, 126.9, 126.6, 119.8, 119.2, 109.6, 89.5, 76.2, 55.8. IR (film):  $\nu(\text{cm}^{-1})$  3509, 3031, 1635, 1619, 1480, 1442, 1353, 1270, 1220, 1171, 1080, 1047, 1000, 827, 767, 731, 698. HRMS (FTMS+c ESI) calcd for  $[\text{C}_{16}\text{H}_{16}\text{O}_3+\text{Na}^+]$ : 279.0992, found 279.0980.

### 2-Chloro-6-(phenyl(vinyloxy)methyl)phenol (1m)

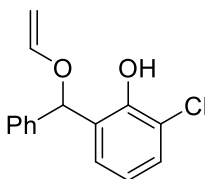

Pale yellow oil, 59% yield;  $^1\text{H NMR}$  (400 MHz,  $\text{CDCl}_3$ )  $\delta$  7.42 – 7.37 (m, 2H), 7.36 – 7.30 (m, 2H), 7.29 – 7.22 (m, 3H), 6.86 (t,  $J = 7.9$  Hz, 1H), 6.45 (dd,  $J = 14.2, 6.7$  Hz, 1H), 6.21 (s, 1H), 6.08 (s, 1H), 4.39 (dd,  $J = 14.2, 2.1$  Hz, 1H), 4.10 (dd,  $J = 6.7, 2.1$  Hz, 1H).  $^{13}\text{C}\{^1\text{H}\}$  NMR (100 MHz,  $\text{CDCl}_3$ )  $\delta$  150.1, 148.6, 139.8, 128.5, 128.5, 128.4, 127.9, 126.8, 126.4, 121.1, 120.3, 90.4, 77.7. IR (film):  $\nu(\text{cm}^{-1})$  3511, 3032, 1618, 1452, 1322, 1242, 1165, 1130, 1051, 956, 828, 771, 733, 700, 636. HRMS (FTMS+c ESI) calcd for  $[\text{C}_{15}\text{H}_{13}^{35}\text{ClO}_2+\text{Na}^+]$ : 283.0496, found 283.0497; HRMS (FTMS+c ESI) calcd for  $[\text{C}_{15}\text{H}_{13}^{37}\text{ClO}_2+\text{Na}^+]$ : 285.0467, found 285.0461.

### 5-Chloro-2-(phenyl(vinyloxy)methyl)phenol (1n)

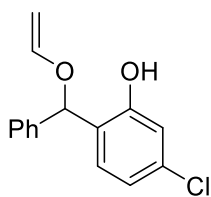

Pale yellow oil, 65% yield;  $^1\text{H}$  NMR (400 MHz,  $\text{CDCl}_3$ )  $\delta$  7.35 – 7.27 (m, 5H), 6.98 (d,  $J$  = 8.1 Hz, 1H), 6.89 – 6.83 (m, 2H), 6.80 (s, 1H), 6.43 (dd,  $J$  = 14.0, 6.6 Hz, 1H), 5.98 (s, 1H), 4.50 (dd,  $J$  = 14.0, 2.3 Hz, 1H), 4.20 (dd,  $J$  = 6.6, 2.3 Hz, 1H).  $^{13}\text{C}\{^1\text{H}\}$  NMR (100 MHz,  $\text{CDCl}_3$ )  $\delta$  155.1, 149.2, 138.7, 134.7, 129.4, 128.7, 128.4, 126.9, 123.9, 120.6, 117.4, 92.2, 81.6. IR (film):  $\nu$  ( $\text{cm}^{-1}$ ) 3416, 3031, 1638, 1607, 1487, 1452, 1413, 1316, 1162, 1081, 1027, 998, 903, 841, 798, 742, 696, 638. HRMS (FTMS+c ESI) calcd for  $[\text{C}_{15}\text{H}_{13}^{35}\text{ClO}_2+\text{Na}^+]$ : 283.0496, found 283.0500; HRMS (FTMS+c ESI) calcd for  $[\text{C}_{15}\text{H}_{13}^{37}\text{ClO}_2+\text{Na}^+]$ : 285.0467, found 285.0461.

#### 4-Methyl-2-(phenyl(vinyl)oxy)methylphenol (1o)

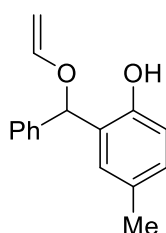

Colorless oil, 46% yield;  $^1\text{H}$  NMR (400 MHz,  $\text{CDCl}_3$ )  $\delta$  7.39 – 7.29 (m, 5H), 7.04 – 6.99 (m, 1H), 6.92 – 6.87 (m, 1H), 6.79 (d,  $J$  = 8.2 Hz, 1H), 6.48 (dd,  $J$  = 14.0, 6.6 Hz, 1H), 6.37 (s, 1H), 5.99 (s, 1H), 4.52 (dd,  $J$  = 14.0, 2.1 Hz, 1H), 4.19 (dd,  $J$  = 6.6, 2.1 Hz, 1H), 2.25 (s, 3H).  $^{13}\text{C}\{^1\text{H}\}$  NMR (100 MHz,  $\text{CDCl}_3$ )  $\delta$  152.0, 149.6, 139.3, 130.1, 129.6, 128.9, 128.6, 128.1, 126.9, 124.8, 116.9, 91.8, 82.4, 20.5. IR (film):  $\nu$  ( $\text{cm}^{-1}$ ) 3414, 2919, 1620, 1499, 1452, 1323, 1253, 1167, 1043, 995, 945, 814, 726, 697. HRMS (FTMS+c ESI) calcd for  $[\text{C}_{16}\text{H}_{16}\text{O}_2+\text{Na}^+]$ : 263.1043, found 263.1039.

#### 4-Methoxy-2-(phenyl(vinyl)oxy)methylphenol (1p)

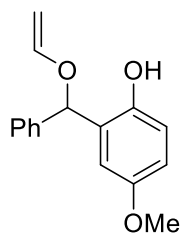

Pale yellow oil, 36% yield;  $^1\text{H}$  NMR (400 MHz,  $\text{CDCl}_3$ )  $\delta$  7.41 – 7.28 (m, 5H), 6.83 – 6.73 (m, 2H), 6.70 – 6.64 (m, 1H), 6.48 (dd,  $J$  = 14.1, 6.6 Hz, 1H), 6.11 (s, 1H), 6.00 (s, 1H), 4.51 (dd,  $J$  = 14.1, 2.1 Hz, 1H), 4.19 (dd,  $J$  = 6.6, 2.1 Hz, 1H), 3.73 (s, 3H).  $^{13}\text{C}\{^1\text{H}\}$  NMR (100 MHz,  $\text{CDCl}_3$ )  $\delta$  153.3, 149.6, 148.0, 139.1, 128.6, 128.2, 127.0, 126.2, 117.7, 114.4, 113.9, 91.7, 81.8, 55.7. IR (film):  $\nu$  ( $\text{cm}^{-1}$ ) 3399, 3031, 1637, 1620, 1499, 1451, 1430, 1322, 1268, 1232, 1167, 1035, 997, 944, 816, 757, 732, 697. HRMS (FTMS+c ESI) calcd for  $[\text{C}_{16}\text{H}_{16}\text{O}_3+\text{Na}^+]$ : 279.0992, found 279.0985.

#### 4-Fluoro-2-(phenyl(vinyl)oxy)methylphenol (1q)

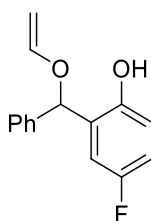

Pale yellow oil, 40% yield;  $^1\text{H}$  NMR (400 MHz,  $\text{CDCl}_3$ )  $\delta$  7.38 – 7.27 (m, 5H), 6.90 – 6.79 (m, 2H), 6.79 – 6.73 (m, 1H), 6.47 – 6.25 (m, 2H), 5.99 (s, 1H), 4.48 (dd,  $J = 14.1, 2.2$  Hz, 1H), 4.18 (dd,  $J = 6.6, 2.2$  Hz, 1H).  $^{13}\text{C}\{^1\text{H}\}$  NMR (100 MHz,  $\text{CDCl}_3$ )  $\delta$  156.7 (d,  $J = 237.0$  Hz), 150.0 (d,  $J = 2.1$  Hz), 149.4, 138.7, 128.7, 128.4, 126.9, 126.8, 117.8 (d,  $J = 7.9$  Hz), 115.7 (d,  $J = 22.9$  Hz), 114.7 (d,  $J = 24.0$  Hz), 91.9, 80.8.  $^{19}\text{F}\{^1\text{H}\}$  NMR (376 MHz,  $\text{CDCl}_3$ )  $\delta$  -123.43. IR (film):  $\nu(\text{cm}^{-1})$  3425, 3033, 1639, 1623, 1494, 1437, 1322, 1261, 1230, 1163, 1046, 1001, 947, 816, 767, 732, 697. HRMS (FTMS+c ESI) calcd for  $[\text{C}_{15}\text{H}_{13}\text{FO}_2+\text{Na}^+]$ : 267.0792, found 267.0789.

#### 4-Chloro-2-(phenyl(vinyloxy)methyl)phenol (1r)

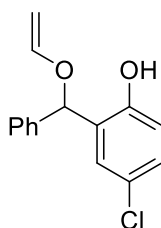

Pale yellow oil, 78% yield;  $^1\text{H}$  NMR (400 MHz,  $\text{CDCl}_3$ )  $\delta$  7.36 – 7.25 (m, 5H), 7.14 – 7.06 (m, 2H), 6.74 (d,  $J = 8.5$  Hz, 1H), 6.61 (s, 1H), 6.41 (dd,  $J = 14.1, 6.6$  Hz, 1H), 5.96 (s, 1H), 4.48 (dd,  $J = 14.1, 2.3$  Hz, 1H), 4.18 (dd,  $J = 6.6, 2.3$  Hz, 1H).  $^{13}\text{C}\{^1\text{H}\}$  NMR (100 MHz,  $\text{CDCl}_3$ )  $\delta$  152.7, 149.3, 138.6, 129.2, 128.7, 128.4, 128.0, 127.1, 126.8, 125.2, 118.3, 92.1, 81.1. IR (film):  $\nu(\text{cm}^{-1})$  3424, 3032, 1639, 1621, 1486, 1418, 1320, 1269, 1234, 1164, 1110, 1047, 999, 886, 817, 744, 698, 649. HRMS (FTMS+c ESI) calcd for  $[\text{C}_{15}\text{H}_{13}^{35}\text{ClO}_2+\text{Na}^+]$ : 283.0496, found 283.0487; HRMS (FTMS+c ESI) calcd for  $[\text{C}_{15}\text{H}_{13}^{37}\text{ClO}_2+\text{Na}^+]$ : 285.0467, found 285.0460.

#### 4-Bromo-2-(phenyl(vinyloxy)methyl)phenol (1s)

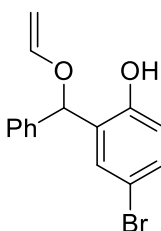

Colorless oil, 29% yield;  $^1\text{H}$  NMR (400 MHz,  $\text{CDCl}_3$ )  $\delta$  7.37 – 7.28 (m, 5H), 7.28 – 7.24 (m, 1H), 7.24 – 7.21 (m, 1H), 6.71 (d,  $J = 8.6$  Hz, 1H), 6.64 (s, 1H), 6.42 (dd,  $J = 14.0, 6.6$  Hz, 1H), 5.96 (s, 1H), 4.49 (dd,  $J = 14.0, 2.3$  Hz, 1H), 4.19 (dd,  $J = 6.6, 2.3$  Hz, 1H).  $^{13}\text{C}\{^1\text{H}\}$  NMR (100 MHz,  $\text{CDCl}_3$ )  $\delta$  153.2, 149.2, 138.6, 132.2, 130.9, 128.7, 128.4, 127.5, 126.8, 118.8, 112.4, 92.2, 81.2. IR (film):  $\nu(\text{cm}^{-1})$  3419, 3031, 1638, 1620, 1480, 1414, 1397, 1319, 1269, 1234, 1162, 1103, 1045, 999, 936, 814, 752, 696, 623. HRMS (FTMS+c ESI) calcd for  $[\text{C}_{15}\text{H}_{13}^{79}\text{BrO}_2+\text{Na}^+]$ : 326.9991, found 326.9985; HRMS (FTMS+c ESI) calcd for  $[\text{C}_{15}\text{H}_{13}^{81}\text{BrO}_2+\text{Na}^+]$ : 328.9971, found 328.9974.

#### 3-Fluoro-2-(phenyl(vinyloxy)methyl)phenol (1t)

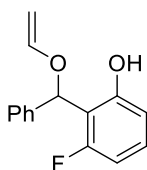

Pale yellow oil, 44% yield;  $^1\text{H}$  NMR (400 MHz,  $\text{CDCl}_3$ )  $\delta$  7.44 – 7.35 (m, 3H), 7.35 – 7.23 (m, 3H), 7.17 – 7.08 (m, 1H), 6.73 – 6.66 (m, 1H), 6.66 – 6.57 (m, 1H), 6.46 (dd,  $J = 14.0, 6.6$  Hz, 1H), 6.36 (s, 1H), 4.57 (dd,  $J =$

14.0, 2.5 Hz, 1H), 4.24 (dd,  $J = 6.6, 2.5$  Hz, 1H).  $^{13}\text{C}\{^1\text{H}\}$  NMR (100 MHz,  $\text{CDCl}_3$ )  $\delta$  160.1 (d,  $J = 243.2$  Hz), 156.2 (d,  $J = 5.0$  Hz), 149.0, 138.3, 130.0 (d,  $J = 10.8$  Hz), 128.7, 128.4, 126.4, 113.3 (d,  $J = 2.9$  Hz), 113.0 (d,  $J = 16.0$  Hz), 106.8 (d,  $J = 22.2$  Hz), 92.3.  $^{19}\text{F}\{^1\text{H}\}$  NMR (376 MHz,  $\text{CDCl}_3$ )  $\delta$  -118.11. IR (film):  $\nu$  ( $\text{cm}^{-1}$ ) 3427, 3033, 1624, 1588, 1471, 1342, 1263, 1217, 1155, 1022, 940, 834, 781, 755, 697. HRMS (FTMS+c ESI) calcd for  $[\text{C}_{15}\text{H}_{13}\text{FO}_2+\text{Na}^+]$ : 267.0792, found 267.0793.

#### 1-(Phenyl(vinylloxy)methyl)naphthalen-2-ol (1u)

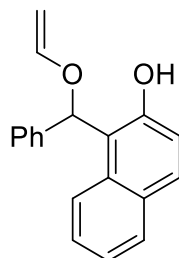

Yellow oil, 47% yield;  $^1\text{H}$  NMR (400 MHz,  $\text{CDCl}_3$ )  $\delta$  7.84 (s, 1H), 7.80 – 7.69 (m, 3H), 7.44 – 7.32 (m, 3H), 7.32 – 7.20 (m, 4H), 7.18 – 7.13 (m, 1H), 6.78 (s, 1H), 6.51 (dd,  $J = 14.0, 6.6$  Hz, 1H), 4.52 (dd,  $J = 14.0, 2.4$  Hz, 1H), 4.16 (dd,  $J = 6.6, 2.4$  Hz, 1H).  $^{13}\text{C}\{^1\text{H}\}$  NMR (100 MHz,  $\text{CDCl}_3$ )  $\delta$  153.6, 149.3, 138.2, 131.8, 130.6, 128.9, 128.8, 128.6, 128.5, 127.3, 127.1, 123.2, 121.2, 119.5, 114.4, 92.2, 80.1. IR (film):  $\nu$  ( $\text{cm}^{-1}$ ) 3414, 3061, 1624, 1517, 1467, 1401, 1315, 1264, 1220, 1159, 1063, 1030, 816, 746, 701. HRMS (FTMS+c ESI) calcd for  $[\text{C}_{19}\text{H}_{16}\text{O}_2+\text{Na}^+]$ : 299.1043, found 299.1046.

#### 1-((3-Fluorophenyl)(vinylloxy)methyl)naphthalen-2-ol (1v)

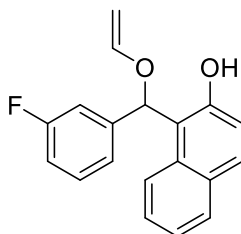

Yellow oil, 39% yield;  $^1\text{H}$  NMR (400 MHz,  $\text{CDCl}_3$ )  $\delta$  7.83 – 7.69 (m, 3H), 7.62 (s, 1H), 7.47 – 7.36 (m, 1H), 7.34 – 7.27 (m, 1H), 7.24 – 7.07 (m, 4H), 6.99 – 6.88 (m, 1H), 6.77 (s, 1H), 6.49 (dd,  $J = 14.0, 6.6$  Hz, 1H), 4.52 (dd,  $J = 14.0, 2.4$  Hz, 1H), 4.17 (dd,  $J = 6.6, 2.4$  Hz, 1H).  $^{13}\text{C}\{^1\text{H}\}$  NMR (100 MHz,  $\text{CDCl}_3$ )  $\delta$  162.9 (d,  $J = 244.9$  Hz), 153.5, 149.2, 141.1 (d,  $J = 6.9$  Hz), 131.8, 130.9, 130.1 (d,  $J = 8.2$  Hz), 129.0, 128.9, 127.3, 123.4, 122.7 (d,  $J = 2.9$  Hz), 121.2, 119.4, 115.3 (d,  $J = 21.0$  Hz), 114.3 (d,  $J = 4.8$  Hz), 114.1, 92.3, 78.7.  $^{19}\text{F}\{^1\text{H}\}$  NMR (376 MHz,  $\text{CDCl}_3$ )  $\delta$  -112.18. IR (film):  $\nu$  ( $\text{cm}^{-1}$ ) 3423, 3066, 1621, 1593, 1517, 1486, 1443, 1264, 1220, 1163, 1065, 944, 819, 784, 747, 685. HRMS (FTMS+c ESI) calcd for  $[\text{C}_{19}\text{H}_{15}\text{FO}_2+\text{Na}^+]$ : 317.0948, found 317.0957.

#### (4*R*)-4-phenylchroman-2-ol (2a)

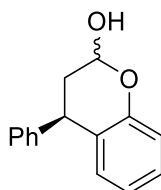

2 h, **L-PiPr<sub>2</sub>/Fe(OTf)<sub>2</sub>** (1/1, 1 mol% catalyst loading); colorless oil, 42.0 mg, 93% yield, 3.5:1 d.r., 99% ee;  $[\alpha]^{20} = -165.9$  ( $c = 0.79$  in  $\text{CH}_2\text{Cl}_2$ ,  $\lambda = 436$  nm); HPLC (Daicel chiralcel IA, *n*-hexane/*i*-PrOH 90/10, 1.0 mL/min, 230 nm)  $t_{\text{R}(\text{major})} = 7.17$  min,  $t_{\text{R}(\text{minor})} = 9.43$  min;  $^1\text{H NMR}$  (400 MHz,  $\text{CDCl}_3$ )  $\delta$  7.38 – 7.06 (m, 6H), 6.94 – 6.63 (m, 3H), 5.74 – 5.59 (m, 1H), 4.33 (dd,  $J = 11.0, 5.8$  Hz, 1H), 3.34 (dd,  $J = 3.8, 1.5$  Hz, 1H), 2.36 – 2.2 (m, 1H), 2.20 – 2.09 (m, 1H).  $^{13}\text{C}\{^1\text{H}\}$  NMR (100 MHz,  $\text{CDCl}_3$ )  $\delta$  151.8, 144.2, 129.6, 128.8, 128.6, 127.9, 126.7, 125.4, 121.0, 116.8, 91.3, 36.8, 36.01. IR (film):  $\nu$  ( $\text{cm}^{-1}$ ) 3420, 1582, 1488, 1452, 1272, 1224, 1092, 1054, 1015, 895, 754, 701. HRMS (FTMS+c ESI) calcd for  $[\text{C}_{15}\text{H}_{14}\text{O}_2+\text{Na}^+]$ : 249.0886, found 249.0892.

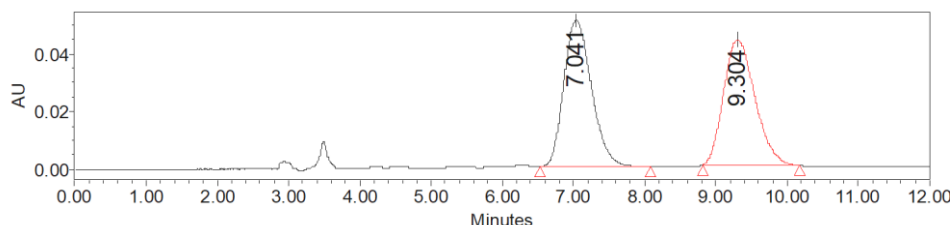

|   | Retention Time | Area    | % Area |
|---|----------------|---------|--------|
| 1 | 7.041          | 1373650 | 50.62  |
| 2 | 9.304          | 1340238 | 49.38  |

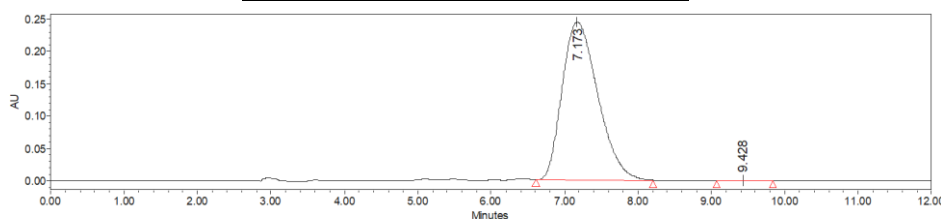

|   | Retention Time | Area    | % Area |
|---|----------------|---------|--------|
| 1 | 7.173          | 8211221 | 99.78  |
| 2 | 9.428          | 17706   | 0.22   |

### (*R*)-4-phenylchroman-2-one (3a)

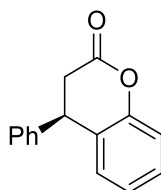

White solid, Mp: 109–113 °C, 37.4 mg, 83% yield over two steps, 99% ee;  $[\alpha]^{20} = -106.7$  ( $c = 0.73$  in  $\text{CH}_2\text{Cl}_2$ ,  $\lambda = 436$  nm); HPLC (Daicel chiralcel IC, *n*-hexane/*i*-PrOH 95/5, 1.0 mL/min, 230 nm)  $t_{\text{R}(\text{minor})} = 19.51$  min,  $t_{\text{R}(\text{major})} = 20.33$  min;  $^1\text{H NMR}$  (400 MHz,  $\text{CDCl}_3$ )  $\delta$  7.39 – 7.23 (m, 4H), 7.21 – 7.01 (m, 4H), 7.01 – 6.93 (m, 1H), 4.34 (t,  $J = 6.9$  Hz, 1H), 3.11 – 2.97 (m, 2H).  $^{13}\text{C}\{^1\text{H}\}$  NMR (100 MHz,  $\text{CDCl}_3$ )  $\delta$  167.6, 151.7, 140.2, 129.1, 128.8, 128.3, 127.6, 127.5, 125.7, 124.6, 117.1, 40.6, 37.0. IR (film):  $\nu$  ( $\text{cm}^{-1}$ ) 1769, 1488, 1454, 1275, 1218, 1177, 1136, 920, 756, 700. HRMS (FTMS+c ESI) calcd for  $[\text{C}_{15}\text{H}_{12}\text{O}_2+\text{Na}^+]$ : 247.0730, found 247.0737.

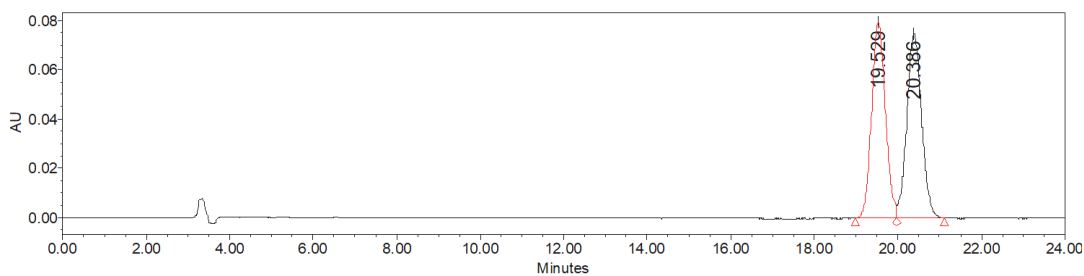

|   | Retention Time | Area    | % Area |
|---|----------------|---------|--------|
| 1 | 19.529         | 1833455 | 49.79  |
| 2 | 20.386         | 1849124 | 50.21  |

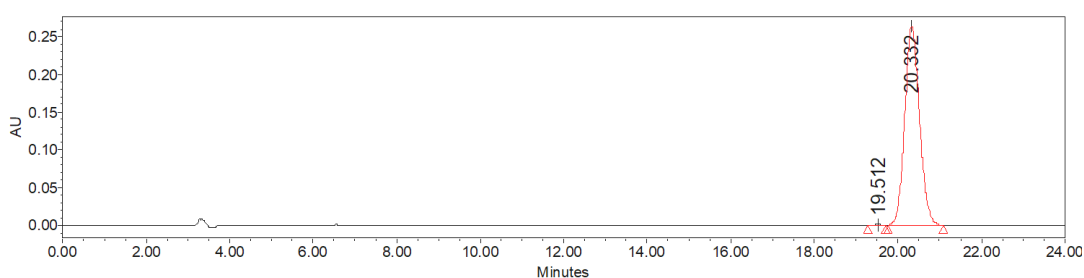

|   | Retention Time | Area    | % Area |
|---|----------------|---------|--------|
| 1 | 19.512         | 11076   | 0.17   |
| 2 | 20.332         | 6433799 | 99.83  |

#### 2-methyl-4-phenyl-4H-benzo[d][1,3]dioxine (2a')

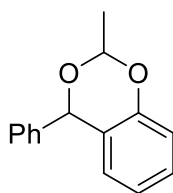

Colorless oil;  $^1\text{H NMR}$  (400 MHz,  $\text{CDCl}_3$ )  $\delta$  7.40 – 7.33 (m, 5H), 7.19 – 7.13 (m, 1H), 6.93 – 6.86 (m, 1H), 6.85 – 6.76 (m, 1H), 6.68 – 6.58 (m, 1H), 5.98 (s, 1H), 5.47 (q,  $J = 5.1$  Hz, 1H), 1.61 (d,  $J = 5.1$  Hz, 3H).  $^{13}\text{C}\{^1\text{H}\}$  NMR (100 MHz,  $\text{CDCl}_3$ )  $\delta$  153.1, 140.3, 128.7, 128.6, 128.6, 128.3, 127.0, 124.7, 121.0, 116.5, 97.2, 79.7, 20.9. IR (film):  $\nu(\text{cm}^{-1})$  1585, 1485, 1459, 1406, 1352, 1238, 1123, 1094, 931, 915, 752, 698. HRMS (FTMS+c ESI) calcd for  $[\text{C}_{15}\text{H}_{14}\text{O}_2+\text{H}^+]$ : 227.1067, found 227.1062.

#### (4R)-4-(o-tolyl)chroman-2-ol (2b)



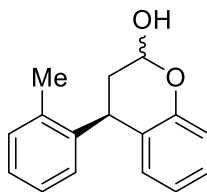

3 h, **L-PiPr<sub>2</sub>/Fe(OTf)<sub>2</sub>** (1/1, 1 mol% catalyst loading); colorless oil, 33.5 mg, 70% yield, 3.7:1 d.r.;  $[\alpha]^{25} = -132.7$  ( $c = 0.54$  in  $\text{CH}_2\text{Cl}_2$ ,  $\lambda = 436$  nm);  $^1\text{H NMR}$  (400 MHz,  $\text{CDCl}_3$ )  $\delta$  7.23 – 7.07 (m, 4H), 7.05 – 6.94 (m, 1H), 6.93 – 6.85 (m, 1H), 6.85 – 6.76 (m, 1H), 6.76 – 6.63 (m, 1H), 5.83 – 5.62 (m, 1H), 4.60 (dd,  $J = 10.7, 5.9$  Hz, 1H), 3.41 – 3.17 (m, 1H), 2.40 (s, 3H), 2.30 – 2.00 (m, 2H).  $^{13}\text{C}\{^1\text{H}\}$  NMR (100 MHz,  $\text{CDCl}_3$ )  $\delta$  152.1, 142.2, 136.4, 130.5, 129.3, 128.7, 127.7, 126.5, 126.4, 125.5, 121.1, 116.9, 91.5, 34.6, 32.8, 19.6. IR (film):  $\nu$  ( $\text{cm}^{-1}$ ) 3411, 2931, 1582, 1487, 1453, 1274, 1215, 1114, 1054, 1015, 939, 898, 754. HRMS (FTMS+c ESI) calcd for  $[\text{C}_{16}\text{H}_{16}\text{O}_2 + \text{Na}^+]$ : 263.1043, found 263.1039.

### (R)-4-(o-tolyl)chroman-2-one (3b)

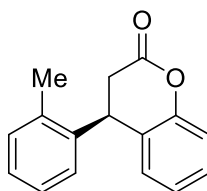

Colorless oil, 29.0 mg, 61% yield over two steps, 97% ee;  $[\alpha]^{27} = -161.9$  ( $c = 0.40$  in  $\text{CH}_2\text{Cl}_2$ ,  $\lambda = 436$  nm); HPLC (Daicel chiralcel ID, *n*-hexane/*i*-PrOH 98/2, 1.0 mL/min, 230 nm)  $t_{\text{R}}(\text{minor}) = 17.14$  min,  $t_{\text{R}}(\text{major}) = 18.13$  min;  $^1\text{H NMR}$  (400 MHz,  $\text{CDCl}_3$ )  $\delta$  7.33 – 7.11 (m, 5H), 7.10 – 7.01 (m, 1H), 6.95 – 6.87 (m, 1H), 6.87 – 6.80 (m, 1H), 4.59 (dd,  $J = 8.9, 6.0$  Hz, 1H), 3.13 – 2.80 (m, 2H), 2.40 (s, 3H).  $^{13}\text{C}\{^1\text{H}\}$  NMR (100 MHz,  $\text{CDCl}_3$ )  $\delta$  167.8, 152.0, 138.0, 135.9, 131.0, 128.7, 128.0, 127.5, 126.9, 126.8, 125.9, 124.7, 117.0, 36.5, 35.9, 19.5. IR (film):  $\nu$  ( $\text{cm}^{-1}$ ) 2922, 1770, 1609, 1587, 1487, 1454, 1279, 1215, 1175, 1143, 918, 755. HRMS (FTMS+c ESI) calcd for  $[\text{C}_{16}\text{H}_{14}\text{O}_2 + \text{Na}^+]$ : 261.0886, found 261.0882.

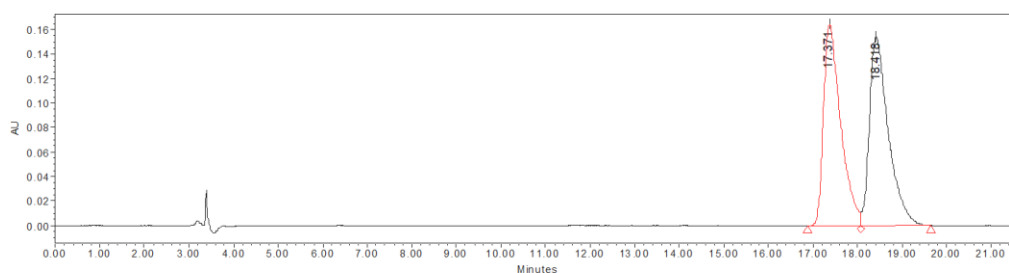

|   | Retention Time | Area    | % Area |
|---|----------------|---------|--------|
| 1 | 17.371         | 4394668 | 49.21  |
| 2 | 18.418         | 4535932 | 50.79  |

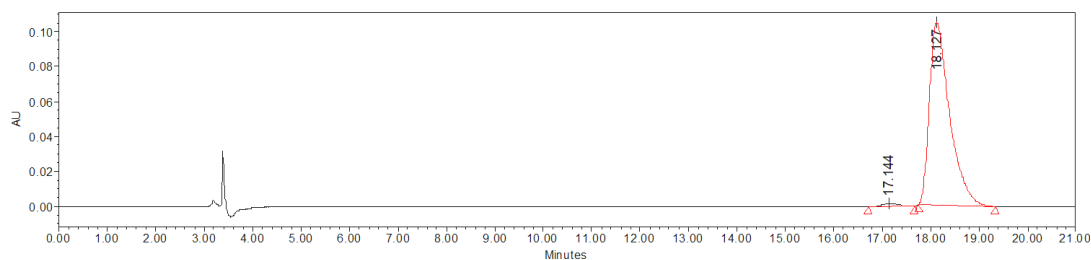

|   | Retention Time | Area    | % Area |
|---|----------------|---------|--------|
| 1 | 17.144         | 40703   | 1.33   |
| 2 | 18.127         | 3022177 | 98.67  |

**(4*R*)-4-(*m*-tolyl)chroman-2-ol (2c)**

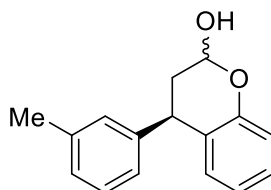

3 h, **L-PrPr<sub>2</sub>/Fe(OTf)<sub>2</sub>** (1/1, 1 mol% catalyst loading); colorless oil, 40.6 mg, 85% yield, 3.7:1 d.r.;  $[\alpha]^{20} = -163.2$  ( $c = 0.79$  in  $\text{CH}_2\text{Cl}_2$ ,  $\lambda = 436$  nm);  $^1\text{H NMR}$  (400 MHz,  $\text{CDCl}_3$ )  $\delta$  7.25 – 7.18 (m, 1H), 7.16 – 6.93 (m, 4H), 6.93 – 6.66 (m, 3H), 5.72 – 5.59 (m, 1H), 4.29 (dd,  $J = 11.0, 5.8$  Hz, 1H), 3.39 – 3.24 (m, 1H), 2.32 (s, 3H), 2.29 – 2.23 (m, 1H), 2.21 – 2.10 (m, 1H).  $^{13}\text{C}\{^1\text{H}\}$  NMR (100 MHz,  $\text{CDCl}_3$ )  $\delta$  151.8, 144.1, 138.2, 129.7, 129.5, 128.5, 127.8, 127.5, 125.9, 125.5, 121.0, 116.8, 91.4, 36.7, 36.1, 21.4. IR (film):  $\nu(\text{cm}^{-1})$  3420, 2934, 1607, 1582, 1486, 1452, 1272, 1223, 1092, 1057, 1016, 913, 755. HRMS (FTMS+c ESI) calcd for  $[\text{C}_{16}\text{H}_{16}\text{O}_2 + \text{Na}^+]$ : 263.1043, found 263.1047.

**(*R*)-4-(*m*-tolyl)chroman-2-one (3c)**

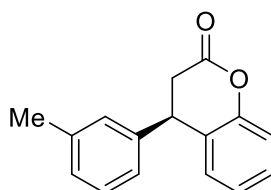

Colorless oil, 38.9 mg, 82% yield over two steps, 99% ee;  $[\alpha]^{20} = -107.4$  ( $c = 0.69$  in  $\text{CH}_2\text{Cl}_2$ ,  $\lambda = 436$  nm); HPLC (Daicel chiralcel ODH, *n*-hexane/*i*-PrOH 90/10, 1.0 mL/min, 230 nm)  $t_{\text{R}}(\text{minor}) = 10.44$  min,  $t_{\text{R}}(\text{major}) = 12.27$  min;  $^1\text{H NMR}$  (400 MHz,  $\text{CDCl}_3$ )  $\delta$  7.32 – 7.20 (m, 2H), 7.17 – 7.02 (m, 3H), 7.01 – 6.88 (m, 3H), 4.30 (t,  $J = 7.0$  Hz, 1H), 3.13 – 2.92 (m, 2H), 2.32 (s, 3H).  $^{13}\text{C}\{^1\text{H}\}$  NMR (100 MHz,  $\text{CDCl}_3$ )  $\delta$  167.7, 151.7, 140.2, 138.8, 129.0, 128.7, 128.4, 128.3, 128.2, 125.9, 124.6, 124.6, 117.0, 40.6, 37.0, 21.4. IR (film):  $\nu(\text{cm}^{-1})$  2918, 1771, 1608, 1586, 1486, 1454, 1278, 1216, 1165, 1133, 920, 757, 702. HRMS (FTMS+c ESI) calcd for  $[\text{C}_{16}\text{H}_{14}\text{O}_2 + \text{Na}^+]$ : 261.0886, found 261.0882.

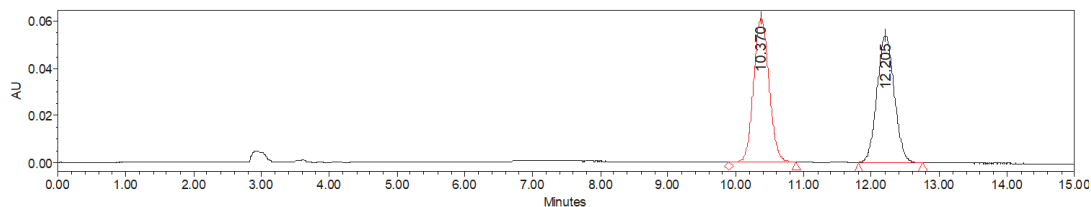

|   | Retention Time | Area   | % Area |
|---|----------------|--------|--------|
| 1 | 10.370         | 959664 | 50.01  |
| 2 | 12.205         | 959291 | 49.99  |

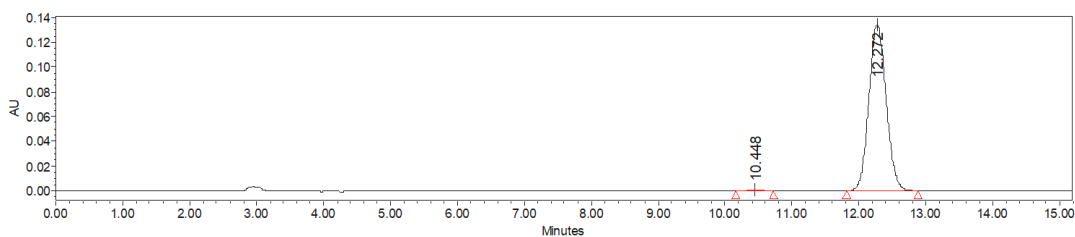

|   | Retention Time | Area    | % Area |
|---|----------------|---------|--------|
| 1 | 10.448         | 15141   | 0.63   |
| 2 | 12.272         | 2405694 | 99.37  |

**(4*R*)-4-(3-fluorophenyl)chroman-2-ol (2d)**

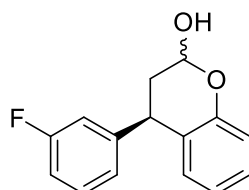

8 h, **L-PiPr<sub>2</sub>/Fe(OTf)<sub>2</sub>** (1/1, 1 mol% catalyst loading); colorless oil, 43.9 mg, 90% yield, 4:1 d.r.;  $[\alpha]^{18} = -145.6$  ( $c = 0.86$  in  $\text{CH}_2\text{Cl}_2$ ,  $\lambda = 436$  nm);  $^1\text{H NMR}$  (400 MHz,  $\text{CDCl}_3$ )  $\delta$  7.33 – 7.23 (m, 1H), 7.19 – 7.07 (m, 1H), 7.05 – 6.69 (m, 6H), 5.74 – 5.60 (m, 1H), 4.34 (dd,  $J = 11.1, 5.7$  Hz, 1H), 3.42 (dd,  $J = 3.6, 1.5$  Hz, 1H), 2.34 – 2.23 (m, 1H), 2.19 – 2.03 (m, 1H).  $^{13}\text{C}\{^1\text{H}\}$  NMR (100 MHz,  $\text{CDCl}_3$ )  $\delta$  163.0 (d,  $J = 244.4$  Hz), 151.7, 146.9 (d,  $J = 6.9$  Hz), 130.1 (d,  $J = 8.2$  Hz), 129.5, 128.1, 124.7, 124.5 (d,  $J = 2.6$  Hz), 121.1, 117.0, 115.6 (d,  $J = 21.2$  Hz), 113.7 (d,  $J = 21.0$  Hz), 91.2, 36.6 (d,  $J = 1.3$  Hz), 35.9.  $^{19}\text{F}\{^1\text{H}\}$  NMR (376 MHz,  $\text{CDCl}_3$ )  $\delta$  -112.85. IR (film):  $\nu$  ( $\text{cm}^{-1}$ ) 3417, 1586, 1486, 1450, 1270, 1223, 1138, 1056, 1017, 894, 756. HRMS (FTMS+c ESI) calcd for  $[\text{C}_{15}\text{H}_{13}\text{FO}_2 + \text{Na}^+]$ : 267.0792, found 267.0792.

**(*R*)-4-(3-fluorophenyl)chroman-2-one (3d)**

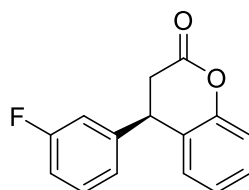

Colorless oil, 40.8 mg, 84% yield over two steps, 99% ee;  $[\alpha]^{19} = -61.8$  ( $c = 0.80$  in  $\text{CH}_2\text{Cl}_2$ ,  $\lambda = 436$  nm); HPLC (Daicel chiralcel ODH, *n*-hexane/*i*-PrOH 90/10, 1.0 mL/min, 230 nm)  $t_{\text{R}(\text{minor})} = 12.87$  min,  $t_{\text{R}(\text{major})} = 16.21$  min;  $^1\text{H NMR}$  (400 MHz,  $\text{CDCl}_3$ )  $\delta$  7.42 – 7.26 (m, 2H), 7.21 – 7.06 (m, 2H), 7.06 – 6.88 (m, 3H), 6.87 – 6.78 (m, 1H), 4.35 (t,  $J = 6.7$  Hz, 1H), 3.16 – 2.91 (m, 2H).  $^{13}\text{C}\{^1\text{H}\}$  NMR (100 MHz,  $\text{CDCl}_3$ )  $\delta$  167.1, 163.1 (d,  $J = 245.7$  Hz), 151.6, 142.8 (d,  $J = 6.7$  Hz), 130.7 (d,  $J = 8.2$  Hz), 129.1, 128.2, 124.9, 124.8, 123.2 (d,  $J = 2.8$  Hz), 117.3, 114.7 (d,  $J = 7.0$  Hz), 114.5 (d,  $J = 7.8$  Hz), 40.4 (d,  $J = 1.7$  Hz), 36.8.  $^{19}\text{F}\{^1\text{H}\}$  NMR (376 MHz,  $\text{CDCl}_3$ )  $\delta$  -111.73. IR (film):  $\nu$  ( $\text{cm}^{-1}$ ) 1771, 1588, 1486, 1453, 1345, 1265, 1218, 1157, 919, 756. HRMS (FTMS+c ESI) calcd for  $[\text{C}_{15}\text{H}_{11}\text{FO}_2 + \text{Na}^+]$ : 265.0635, found 265.0638.

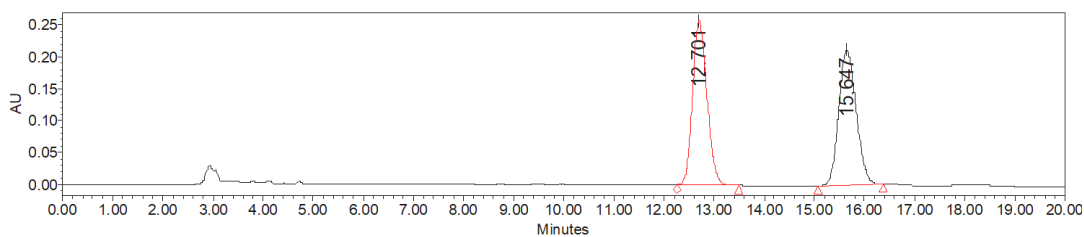

|   | Retention Time | Area    | % Area |
|---|----------------|---------|--------|
| 1 | 12.701         | 5164648 | 50.43  |
| 2 | 15.647         | 5076797 | 49.57  |

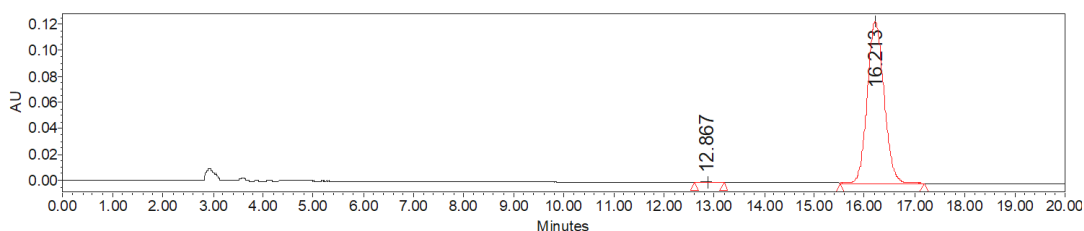

|   | Retention Time | Area    | % Area |
|---|----------------|---------|--------|
| 1 | 12.867         | 12026   | 0.42   |
| 2 | 16.213         | 2879313 | 99.58  |

**(4*R*)-4-(*p*-tolyl)chroman-2-ol (2e)**

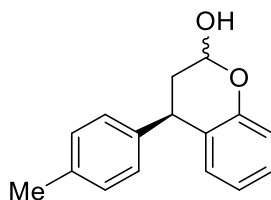

3 h, **L-PrPr<sub>2</sub>/Fe(OTf)<sub>2</sub>** (1/1, 1 mol% catalyst loading); colorless oil, 36.7 mg, 76% yield, 3.5:1 d.r.;  $[\alpha]_{23}^{23} = -168.2$  ( $c = 0.74$  in  $\text{CH}_2\text{Cl}_2$ ,  $\lambda = 436$  nm);  $^1\text{H NMR}$  (400 MHz,  $\text{CDCl}_3$ )  $\delta$  7.21 – 7.01 (m, 5H), 6.95 – 6.72 (m, 3H), 5.79 – 5.62 (m, 1H), 4.32 (dd,  $J = 11.0, 5.8$  Hz, 1H), 3.43 – 3.18 (m, 1H), 2.37 (s, 3H), 2.32 – 2.23 (m, 1H), 2.22 – 2.11 (m, 1H).  $^{13}\text{C}\{^1\text{H}\}$  NMR (100 MHz,  $\text{CDCl}_3$ )  $\delta$  151.8, 141.2, 136.3, 129.6, 129.3, 128.7, 127.8, 125.6, 121.0, 116.8, 91.4, 36.4, 36.1, 21.0. IR (film):  $\nu$  ( $\text{cm}^{-1}$ ) 3418, 2927, 1582, 1512, 1486, 1451, 1303, 1224, 1112, 1056, 1016, 938, 898, 815, 756. HRMS (FTMS+c ESI) calcd for  $[\text{C}_{16}\text{H}_{16}\text{O}_2 + \text{Na}^+]$ : 263.1043, found 263.1046.

**(*R*)-4-(*p*-tolyl)chroman-2-one (3e)**

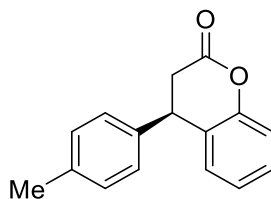

White solid, Mp: 107–111 °C, 30.9 mg, 65% yield over two steps, 96% ee;  $[\alpha]_{19}^{19} = -96.6$  ( $c = 0.39$  in  $\text{CH}_2\text{Cl}_2$ ,  $\lambda = 436$  nm); HPLC (Daicel chiralcel ODH, *n*-hexane/*i*-PrOH 90/10, 1.0 mL/min, 230 nm)  $t_{R(\text{minor})} = 11.38$  min,  $t_{R(\text{major})}$

= 12.27 min;  $^1\text{H NMR}$  (400 MHz,  $\text{CDCl}_3$ )  $\delta$  7.32 – 7.27 (m, 1H), 7.22 – 7.01 (m, 6H), 7.01 – 6.96 (m, 1H), 4.31 (t,  $J = 7.1$  Hz, 1H), 3.14 – 2.87 (m, 2H), 2.34 (s, 3H).  $^{13}\text{C}\{^1\text{H}\}$  NMR (100 MHz,  $\text{CDCl}_3$ )  $\delta$  167.7, 151.7, 137.3, 137.2, 129.8, 128.7, 128.3, 127.4, 126.0, 124.6, 117.0, 40.3, 37.0, 21.0. IR (film):  $\nu$  ( $\text{cm}^{-1}$ ) 2921, 1769, 1513, 1486, 1454, 1279, 1218, 1177, 1136, 917, 882, 820, 759. HRMS (FTMS+c ESI) calcd for  $[\text{C}_{16}\text{H}_{14}\text{O}_2+\text{Na}^+]$ : 261.0886, found 261.0881.

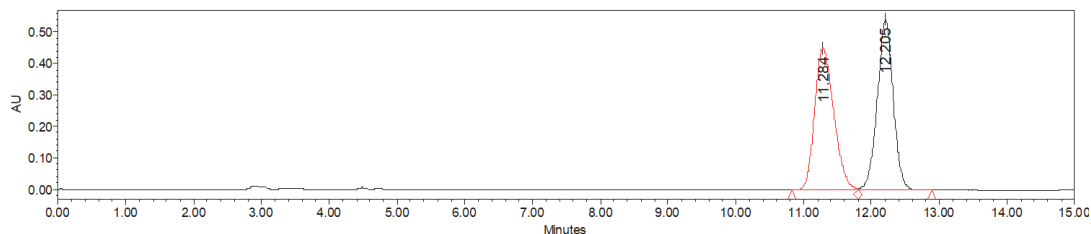

|   | Retention Time | Area    | % Area |
|---|----------------|---------|--------|
| 1 | 11.284         | 8920712 | 50.00  |
| 2 | 12.205         | 8919696 | 50.00  |

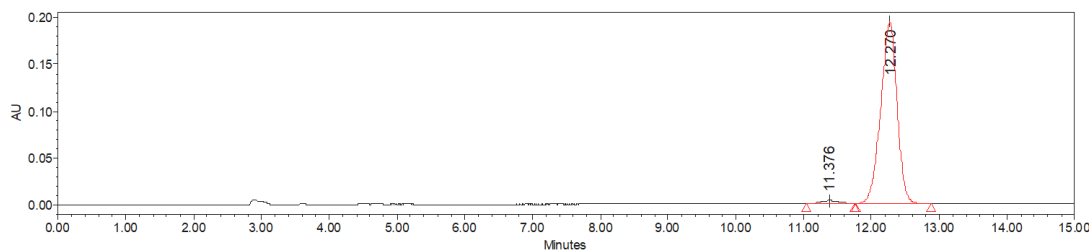

|   | Retention Time | Area    | % Area |
|---|----------------|---------|--------|
| 1 | 11.376         | 61749   | 1.86   |
| 2 | 12.270         | 3260516 | 98.14  |

**(4R)-4-(4-fluorophenyl)chroman-2-ol (2f)**

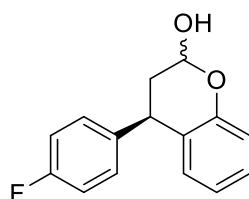

2 h, **L-PiPr<sub>2</sub>/Fe(OTf)<sub>2</sub>** (1/1, 1 mol% catalyst loading); colorless oil, 46.1 mg, 94% yield, 4:1 d.r.;  $[\alpha]_D^{21} = -117.5$  ( $c = 0.90$  in  $\text{CH}_2\text{Cl}_2$ ,  $\lambda = 436$  nm);  $^1\text{H NMR}$  (400 MHz,  $\text{CDCl}_3$ )  $\delta$  7.23 – 7.11 (m, 3H), 7.08 – 6.97 (m, 2H), 6.93 – 6.79 (m, 2H), 6.79 – 6.68 (m, 1H), 5.72 – 5.62 (m, 1H), 4.34 (dd,  $J = 11.3, 5.7$  Hz, 1H), 3.48 (dd,  $J = 3.7, 1.7$  Hz, 1H), 2.36 – 2.20 (m, 1H), 2.18 – 2.06 (m, 1H).  $^{13}\text{C}\{^1\text{H}\}$  NMR (100 MHz,  $\text{CDCl}_3$ )  $\delta$  161.7 (d,  $J = 243.4$  Hz), 151.7, 139.8 (d,  $J = 3.2$  Hz), 130.2 (d,  $J = 7.8$  Hz), 129.4, 128.0, 125.2, 121.1, 116.9, 115.4 (d,  $J = 21.1$  Hz), 91.2 (d,  $J = 2.5$  Hz), 36.2, 36.0.  $^{19}\text{F}\{^1\text{H}\}$  NMR (376 MHz,  $\text{CDCl}_3$ )  $\delta$  -116.17. IR (film):  $\nu$  ( $\text{cm}^{-1}$ ) 3423, 1605, 1509, 1487, 1452, 1271, 1225, 1092, 1056, 1016, 899, 834, 756. HRMS (FTMS+c ESI) calcd for  $[\text{C}_{15}\text{H}_{13}\text{FO}_2+\text{Na}^+]$ : 267.0792, found 267.0787.

**(R)-4-(4-fluorophenyl)chroman-2-one (3f)**

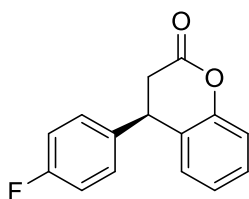

Colorless oil, 39.7 mg, 82% yield over two steps, 98% ee;  $[\alpha]^{22} = -70.3$  ( $c = 0.64$  in  $\text{CH}_2\text{Cl}_2$ ,  $\lambda = 436$  nm); HPLC (Daicel chiralcel OJH, *n*-hexane/*i*-PrOH 90/10, 1.0 mL/min, 254 nm)  $t_{R(\text{minor})} = 21.70$  min,  $t_{R(\text{major})} = 23.51$  min;  $^1\text{H}$  NMR (400 MHz,  $\text{CDCl}_3$ )  $\delta$  7.38 – 7.28 (m, 1H), 7.22 – 6.88 (m, 7H), 4.34 (t,  $J = 6.8$  Hz, 1H), 3.16 – 2.86 (m, 2H).  $^{13}\text{C}\{^1\text{H}\}$  NMR (100 MHz,  $\text{CDCl}_3$ )  $\delta$  167.3, 162.1 (d,  $J = 245.1$  Hz), 151.6, 136.0 (d,  $J = 3.2$  Hz), 129.1 (d,  $J = 8.1$  Hz), 128.9, 128.2, 125.5, 124.7, 117.2, 116.0 (d,  $J = 21.4$  Hz), 40.0, 37.1.  $^{19}\text{F}\{^1\text{H}\}$  NMR (376 MHz,  $\text{CDCl}_3$ )  $\delta$  –114.60. IR (film):  $\nu(\text{cm}^{-1})$  1769, 1606, 1509, 1487, 1454, 1278, 1222, 1136, 918, 884, 837, 759. HRMS (FTMS+c ESI) calcd for  $[\text{C}_{15}\text{H}_{11}\text{FO}_2 + \text{Na}^+]$ : 265.0635, found 265.0633.

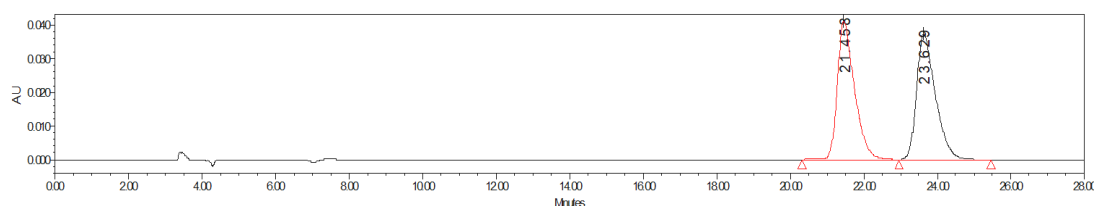

|   | Retention Time | Area    | % Area |
|---|----------------|---------|--------|
| 1 | 21.458         | 1333235 | 50.12  |
| 2 | 23.629         | 1326662 | 49.88  |

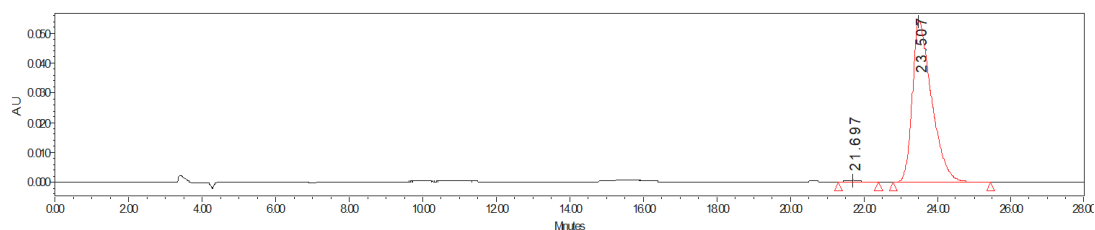

|   | Retention Time | Area    | % Area |
|---|----------------|---------|--------|
| 1 | 21.697         | 15721   | 0.79   |
| 2 | 23.507         | 1979129 | 99.21  |

**(4R)-4-(4-chlorophenyl)chroman-2-ol (2g)**

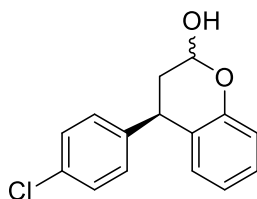

2 h, **L-PiPr<sub>2</sub>/Fe(OTf)<sub>2</sub>** (1/1, 1 mol% catalyst loading); colorless oil, 49.0 mg, 94% yield, 4:1 d.r.;  $[\alpha]^{23} = -158.3$  ( $c = 0.97$  in  $\text{CH}_2\text{Cl}_2$ ,  $\lambda = 436$  nm);  $^1\text{H}$  NMR (400 MHz,  $\text{CDCl}_3$ )  $\delta$  7.35 – 7.25 (m, 2H), 7.22 – 7.06 (m, 3H), 6.93 – 6.77 (m, 2H), 6.77 – 6.63 (m, 1H), 5.75 – 5.60 (m, 1H), 4.31 (dd,  $J = 11.3, 5.7$  Hz, 1H), 3.49 (dd,  $J = 3.4, 1.4$  Hz,

1H), 2.34 – 2.20 (m, 1H), 2.15 – 2.03 (m, 1H). <sup>13</sup>C{<sup>1</sup>H} NMR (100 MHz, CDCl<sub>3</sub>) δ 151.7, 142.7, 132.5, 130.1, 129.4, 128.8, 128.1, 124.9, 121.1, 117.0, 91.2, 36.2, 36.0. IR (film): ν (cm<sup>-1</sup>) 3423, 1582, 1488, 1451, 1302, 1273, 1225, 1090, 1056, 1015, 939, 899, 826, 754. HRMS (FTMS+c ESI) calcd for [C<sub>15</sub>H<sub>13</sub><sup>35</sup>ClO<sub>2</sub>+Na<sup>+</sup>]: 283.0496, found 283.0490; HRMS (FTMS+c ESI) calcd for [C<sub>15</sub>H<sub>13</sub><sup>37</sup>ClO<sub>2</sub>+Na<sup>+</sup>]: 285.0467, found 285.0460.

**(R)-4-(4-chlorophenyl)chroman-2-one (3g)**

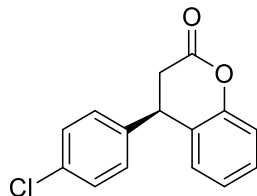

White solid, Mp: 138–141 °C, 41.6 mg, 81% yield over two steps, 97% ee; [α]<sup>22</sup> = –87.0 (c = 0.69 in CH<sub>2</sub>Cl<sub>2</sub>, λ = 436 nm); HPLC (Daicel chiralcel OJH, *n*-hexane/*i*-PrOH 90/10, 1.0 mL/min, 254 nm) *t*<sub>R(minor)</sub> = 21.61 min, *t*<sub>R(major)</sub> = 25.21 min; <sup>1</sup>H NMR (400 MHz, CDCl<sub>3</sub>) δ 7.38 – 7.27 (m, 3H), 7.17 – 7.05 (m, 4H), 7.02 – 6.93 (m, 1H), 4.33 (t, *J* = 6.8 Hz, 1H), 3.13 – 2.93 (m, 2H). <sup>13</sup>C{<sup>1</sup>H} NMR (100 MHz, CDCl<sub>3</sub>) δ 167.2, 151.6, 138.8, 133.5, 129.3, 129.0, 128.9, 128.2, 125.2, 124.7, 117.2, 40.1, 36.9. IR (film): ν (cm<sup>-1</sup>) 1768, 1586, 1489, 1454, 1411, 1280, 1219, 1176, 1134, 1092, 914, 882, 830, 756. HRMS (FTMS+c ESI) calcd for [C<sub>15</sub>H<sub>11</sub><sup>35</sup>ClO<sub>2</sub>+Na<sup>+</sup>]: 281.0340, found 281.0342; HRMS (FTMS+c ESI) calcd for [C<sub>15</sub>H<sub>11</sub><sup>37</sup>ClO<sub>2</sub>+Na<sup>+</sup>]: 283.0310, found 283.0311.

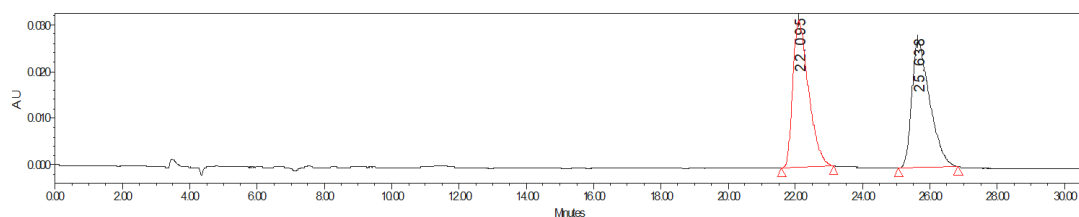

|   | Retention Time | Area    | % Area |
|---|----------------|---------|--------|
| 1 | 22.095         | 1015889 | 50.08  |
| 2 | 25.638         | 1012559 | 49.92  |

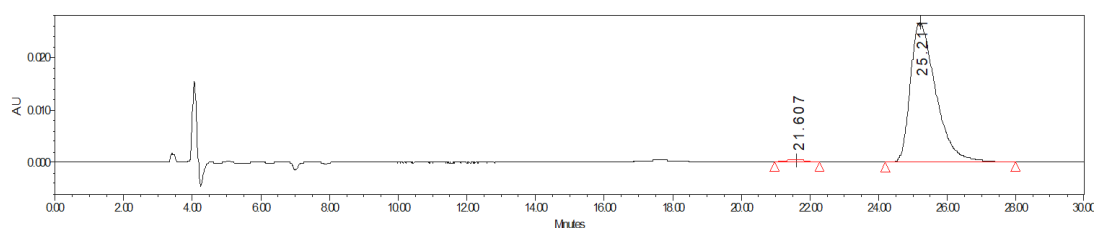

|   | Retention Time | Area    | % Area |
|---|----------------|---------|--------|
| 1 | 21.607         | 18162   | 1.31   |
| 2 | 25.211         | 1373331 | 98.69  |

**(4S)-4-methylchroman-2-ol (2h)**

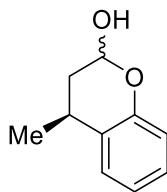

2 h, **L-PiPr<sub>2</sub>/Fe(OTf)<sub>2</sub>** (1/1, 1 mol% catalyst loading); colorless oil, 27.7 mg, 84% yield, 2.6:1 d.r.;  $[\alpha]_D^{21} = -79.0$  ( $c = 0.48$  in  $\text{CH}_2\text{Cl}_2$ ,  $\lambda = 436$  nm);  $^1\text{H NMR}$  (400 MHz,  $\text{CDCl}_3$ )  $\delta$  7.26 – 7.18 (m, 1H), 7.17 – 7.08 (m, 1H), 6.97 – 6.89 (m, 1H), 6.87 – 6.78 (m, 1H), 5.65 – 5.58 (m, 1H), 3.46 – 3.35 (m, 1H), 3.24 – 3.09 (m, 1H), 2.13 – 2.01 (m, 1H), 1.77 – 1.65 (m, 1H), 1.37 (d,  $J = 7.0$  Hz, 3H).  $^{13}\text{C}\{^1\text{H}\}$  NMR (100 MHz,  $\text{CDCl}_3$ )  $\delta$  151.3, 127.4, 127.3, 127.2, 121.0, 116.8, 91.4, 35.5, 24.2, 20.4. IR (film):  $\nu$  ( $\text{cm}^{-1}$ ) 3413, 2960, 1581, 1488, 1450, 1219, 1131, 1099, 1039, 978, 893, 754. HRMS (FTMS+c ESI) calcd for  $[\text{C}_{10}\text{H}_{12}\text{O}_2 + \text{Na}^+]$ : 187.0730, found 187.0731.

**(S)-4-methylchroman-2-one (3h)**

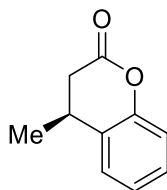

Colorless oil, 21.8 mg, 67% yield over two steps, 98% ee;  $[\alpha]_D^{21} = -63.1$  ( $c = 0.21$ ,  $\text{CH}_2\text{Cl}_2$ ,  $\lambda = 436$  nm); HPLC (Daicel chiralcel ID, *n*-hexane/*i*-PrOH 95/5, 1.0 mL/min, 230 nm)  $t_{\text{R}(\text{minor})} = 11.82$  min,  $t_{\text{R}(\text{major})} = 12.48$  min;  $^1\text{H NMR}$  (400 MHz,  $\text{CDCl}_3$ )  $\delta$  7.22 – 7.15 (m, 2H), 7.09 – 7.02 (m, 1H), 7.01 – 6.95 (m, 1H), 3.18 – 3.04 (m, 1H), 2.78 (dd,  $J = 15.8, 5.5$  Hz, 1H), 2.52 (dd,  $J = 15.8, 7.2$  Hz, 1H), 1.27 (d,  $J = 7.0$  Hz, 3H).  $^{13}\text{C}\{^1\text{H}\}$  NMR (100 MHz,  $\text{CDCl}_3$ )  $\delta$  168.3, 151.2, 128.3, 127.8, 126.5, 124.6, 117.0, 36.8, 29.5, 19.9. IR (film):  $\nu$  ( $\text{cm}^{-1}$ ) 2965, 1769, 1612, 1487, 1454, 1347, 1286, 1218, 1151, 1079, 909, 831, 760. HRMS (FTMS+c ESI) calcd for  $[\text{C}_{10}\text{H}_{10}\text{O}_2 + \text{Na}^+]$ : 185.0573, found 185.0573.

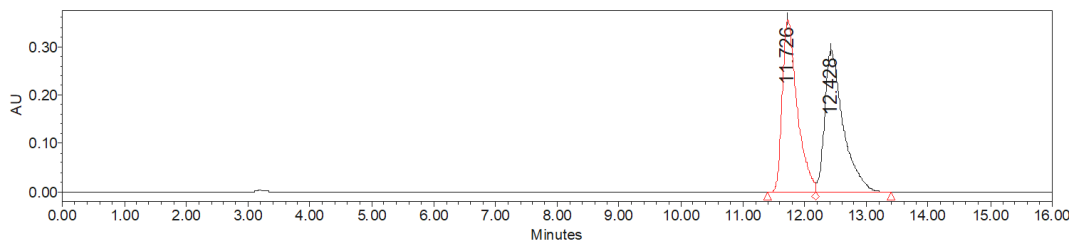

|   | Retention Time | Area    | % Area |
|---|----------------|---------|--------|
| 1 | 11.726         | 6011927 | 49.49  |
| 2 | 12.428         | 6134833 | 50.51  |

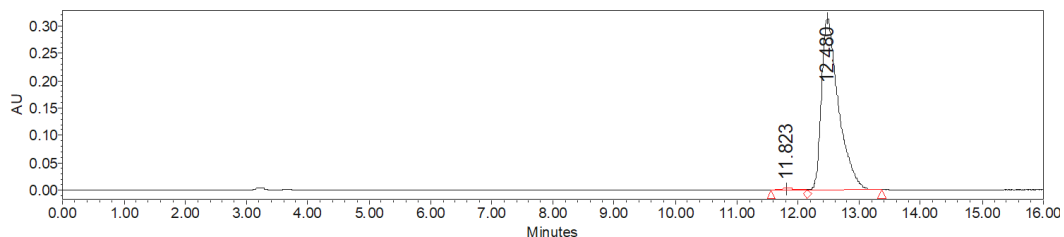

|  | Retention Time | Area | % Area |
|--|----------------|------|--------|
|  | 11.823         |      |        |
|  | 12.480         |      |        |



|   |        |         |       |
|---|--------|---------|-------|
| 1 | 11.823 | 47223   | 0.78  |
| 2 | 12.480 | 6031330 | 99.22 |

**(4S)-4-ethylchroman-2-ol (2i)**

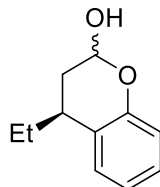

5 h, **L-PiPr<sub>2</sub>/Fe(OTf)<sub>2</sub>** (1/1, 5 mol% catalyst loading); colorless oil, 32.1 mg, 90% yield, 2.7:1 d.r.;  $[\alpha]^{23} = -57.8$  ( $c = 0.61$  in  $\text{CH}_2\text{Cl}_2$ ,  $\lambda = 436$  nm);  $^1\text{H NMR}$  (400 MHz,  $\text{CDCl}_3$ )  $\delta$  7.24 – 7.16 (m, 1H), 7.16 – 7.05 (m, 1H), 6.97 – 6.87 (m, 1H), 6.87 – 6.73 (m, 1H), 5.70 – 5.55 (m, 1H), 3.39 (d,  $J = 4.7$  Hz, 1H), 3.05 – 2.90 (m, 1H), 2.11 – 1.91 (m, 2H), 1.91 – 1.77 (m, 1H), 1.73 – 1.54 (m, 1H), 1.06 – 0.94 (m, 3H).  $^{13}\text{C}\{^1\text{H}\}$  NMR (100 MHz,  $\text{CDCl}_3$ )  $\delta$  151.8, 127.6, 127.4, 126.0, 120.9, 116.9, 91.6, 32.0, 31.4, 27.3, 10.9. IR (film):  $\nu$  ( $\text{cm}^{-1}$ ) 3417, 2963, 1580, 1487, 1453, 1270, 1219, 1132, 1008, 901, 754. HRMS (FTMS+c ESI) calcd for  $[\text{C}_{11}\text{H}_{14}\text{O}_2 + \text{Na}^+]$ : 201.0886, found 201.0883.

**(S)-4-ethylchroman-2-one (3i)**

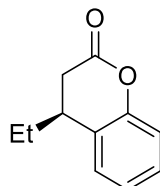

Colorless oil, 28.7 mg, 82% yield over two steps, 99% ee;  $[\alpha]^{21} = -93.0$  ( $c = 0.53$ ,  $\text{CH}_2\text{Cl}_2$ ,  $\lambda = 436$  nm); HPLC (Daicel chiralcel IA, *n*-hexane/*i*-PrOH 98/2, 1.0 mL/min, 230 nm)  $t_{\text{R}(\text{minor})} = 7.39$  min,  $t_{\text{R}(\text{major})} = 7.98$  min;  $^1\text{H NMR}$  (400 MHz,  $\text{CDCl}_3$ )  $\delta$  7.29 – 7.22 (m, 1H), 7.21 – 7.16 (m, 1H), 7.15 – 7.08 (m, 1H), 7.08 – 7.01 (m, 1H), 2.96 – 2.87 (m, 1H), 2.87 – 2.80 (m, 1H), 2.80 – 2.72 (m, 1H), 1.72 – 1.55 (m, 2H), 0.97 (t,  $J = 7.4$  Hz, 3H).  $^{13}\text{C}\{^1\text{H}\}$  NMR (100 MHz,  $\text{CDCl}_3$ )  $\delta$  168.5, 151.3, 128.2, 127.9, 126.5, 124.2, 117.0, 36.6, 34.4, 27.5, 11.1. IR (film):  $\nu$  ( $\text{cm}^{-1}$ ) 2967, 1769, 1613, 1486, 1456, 1267, 1217, 1151, 1116, 1091, 911, 757. HRMS (FTMS+c ESI) calcd for  $[\text{C}_{11}\text{H}_{12}\text{O}_2 + \text{Na}^+]$ : 199.0730, found 199.0728.

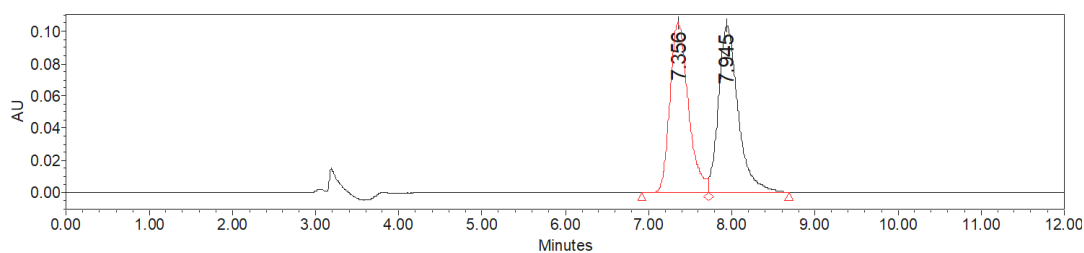

|   | Retention Time | Area    | % Area |
|---|----------------|---------|--------|
| 1 | 7.356          | 1619030 | 49.01  |
| 2 | 7.945          | 1684157 | 50.99  |

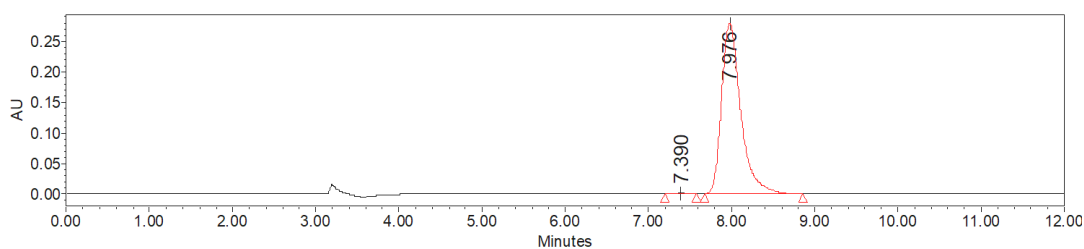

|   | Retention Time | Area    | % Area |
|---|----------------|---------|--------|
| 1 | 7.390          | 16264   | 0.36   |
| 2 | 7.976          | 4482590 | 99.64  |

**(4R)-4-cyclopropylchroman-2-ol (2j)**

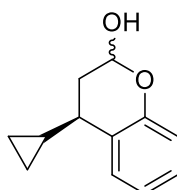

5 h, **L-PiPr<sub>2</sub>/Fe(OTf)<sub>2</sub>** (1/1, 5 mol% catalyst loading); colorless oil, 29.3 mg, 77% yield, 3.0:1 d.r.;  $[\alpha]_D^{23} = -284.0$  ( $c = 0.48$  in  $\text{CH}_2\text{Cl}_2$ ,  $\lambda = 436$  nm);  $^1\text{H NMR}$  (400 MHz,  $\text{CDCl}_3$ )  $\delta$  7.70 – 7.56 (m, 1H), 7.11 – 7.08 (m, 1H), 7.01 – 6.89 (m, 1H), 6.88 – 6.76 (m, 1H), 5.76 – 5.60 (m, 1H), 3.37 – 3.15 (m, 1H), 2.36 – 1.99 (m, 2H), 1.96 – 1.81 (m, 1H), 0.92 – 0.76 (m, 2H), 0.62 – 0.43 (m, 2H), 0.30 – 0.15 (m, 1H).  $^{13}\text{C}\{^1\text{H}\}$  NMR (100 MHz,  $\text{CDCl}_3$ )  $\delta$  151.3, 127.7, 127.6, 126.2, 120.8, 116.6, 91.8, 34.6, 33.6, 15.9, 6.4, 1.9. IR (film):  $\nu$  ( $\text{cm}^{-1}$ ) 3422, 2999, 1580, 1486, 1453, 1270, 1219, 1108, 1018, 916, 883, 754. HRMS (FTMS+c ESI) calcd for  $[\text{C}_{12}\text{H}_{14}\text{O}_2 + \text{Na}^+]$ : 213.0886, found 213.0884.

**(R)-4-cyclopropylchroman-2-one (3j)**

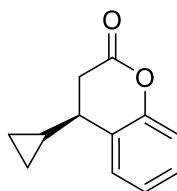

Colorless oil, 28.0 mg, 74% yield over two steps, 88% ee;  $[\alpha]_D^{21} = -177.7$  ( $c = 0.54$ ,  $\text{CH}_2\text{Cl}_2$ ,  $\lambda = 436$  nm); HPLC (Daicel chiralcel IA, *n*-hexane/*i*-PrOH 90/10, 1.0 mL/min, 230 nm)  $t_{R(\text{minor})} = 5.52$  min,  $t_{R(\text{major})} = 6.11$  min;  $^1\text{H NMR}$  (400 MHz,  $\text{CDCl}_3$ )  $\delta$  7.20 – 7.12 (m, 1H), 7.09 – 7.03 (m, 1H), 6.98 – 6.88 (m, 1H), 6.87 – 6.81 (m, 1H), 2.72 – 2.64 (m, 1H), 2.59 – 2.51 (m, 1H), 2.18 (dd,  $J = 14.1, 7.2$  Hz, 1H), 0.72 – 0.63 (m, 1H), 0.48 – 0.33 (m, 2H), 0.15 – 0.07 (m, 1H), 0.03 – 0.04 (m, 1H).  $^{13}\text{C}\{^1\text{H}\}$  NMR (100 MHz,  $\text{CDCl}_3$ )  $\delta$  168.5, 151.4, 128.5, 127.5, 125.8, 124.4, 116.9, 39.2, 35.5, 15.0, 4.2, 2.7. IR (film):  $\nu$  ( $\text{cm}^{-1}$ ) 3000, 1769, 1612, 1586, 1485, 1455, 1274, 1216, 1154, 1023, 931, 874, 756. HRMS (FTMS+c ESI) calcd for  $[\text{C}_{12}\text{H}_{12}\text{O}_2 + \text{Na}^+]$ : 211.0730, found 211.0727.

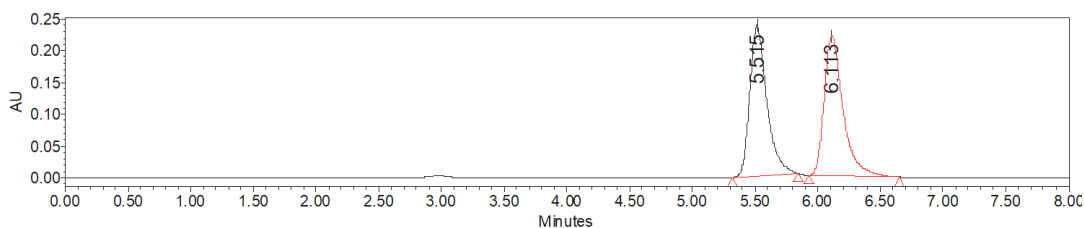

|   | Retention Time | Area    | % Area |
|---|----------------|---------|--------|
| 1 | 5.515          | 2262574 | 49.35  |
| 2 | 6.113          | 2322458 | 50.65  |

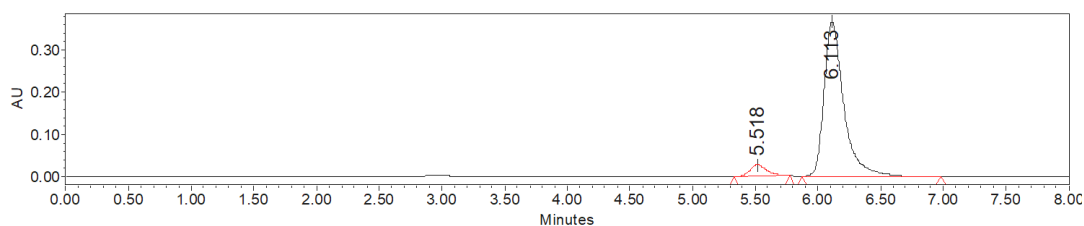

|   | Retention Time | Area    | % Area |
|---|----------------|---------|--------|
| 1 | 5.518          | 251309  | 5.96   |
| 2 | 6.113          | 3961834 | 94.04  |

**(4*R*)-4-cyclohexylchroman-2-ol (2k)**

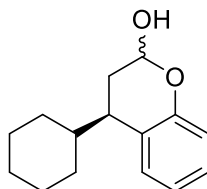

5 h, **L-PiPr<sub>2</sub>/Fe(OTf)<sub>2</sub>** (1/1, 1 mol% catalyst loading); colorless oil, 42.7 mg, 92% yield, 2.7:1 d.r.;  $[\alpha]_D^{21} = -32.1$  ( $c = 0.81$  in  $\text{CH}_2\text{Cl}_2$ ,  $\lambda = 436$  nm);  $^1\text{H NMR}$  (400 MHz,  $\text{CDCl}_3$ )  $\delta$  7.22 – 7.08 (m, 2H), 6.95 – 6.80 (m, 2H), 5.76 – 5.54 (m, 1H), 3.36 (d,  $J = 4.8$  Hz, 1H), 2.92 – 2.84 (m, 1H), 2.16 – 1.53 (m, 8H), 1.43 – 1.07 (m, 4H), 0.97 – 0.84 (m, 1H).  $^{13}\text{C}\{^1\text{H}\}$  NMR (100 MHz,  $\text{CDCl}_3$ )  $\delta$  152.2, 127.8, 127.2, 125.1, 120.7, 117.1, 92.0, 39.9, 35.5, 31.5, 28.7, 27.8, 26.9, 26.6, 26.6. IR (film):  $\nu$  ( $\text{cm}^{-1}$ ) 3409, 2924, 2851, 1581, 1487, 1450, 1220, 1187, 1125, 1051, 1013, 933, 899, 752. HRMS (FTMS+c ESI) calcd for  $[\text{C}_{15}\text{H}_{20}\text{O}_2 + \text{Na}^+]$ : 255.1356, found 255.1355.

**(*R*)-4-cyclohexylchroman-2-one (3k)**

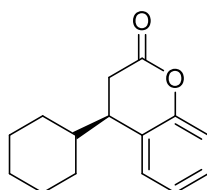

Colorless oil, 38.7 mg, 84% yield over two steps, 99% ee;  $[\alpha]_D^{21} = -67.4$  ( $c = 0.71$ ,  $\text{CH}_2\text{Cl}_2$ ,  $\lambda = 436$  nm); HPLC (Daicel chiralcel ASH, *n*-hexane/*i*-PrOH 95/5, 1.0 mL/min, 230 nm)  $t_{\text{R(major)}} = 9.78$  min,  $t_{\text{R(minor)}} = 10.93$  min;  $^1\text{H}$

NMR (400 MHz, CDCl<sub>3</sub>) δ 7.29 – 7.23 (m, 1H), 7.19 – 7.00 (m, 3H), 2.99 – 2.86 (m, 1H), 2.83 – 2.65 (m, 2H), 1.84 – 1.56 (m, 5H), 1.51 – 1.37 (m, 1H), 1.26 – 0.94 (m, 5H). <sup>13</sup>C{<sup>1</sup>H} NMR (100 MHz, CDCl<sub>3</sub>) δ 168.9, 151.6, 129.1, 128.1, 125.5, 123.9, 117.0, 41.7, 41.2, 32.2, 30.5, 29.5, 26.1, 26.1, 26.0. IR (film): ν (cm<sup>-1</sup>) 2926, 2852, 1770, 1586, 1486, 1452, 1349, 1215, 1151, 1073, 915, 851, 759. HRMS (FTMS+c ESI) calcd for [C<sub>15</sub>H<sub>18</sub>O<sub>2</sub>+Na<sup>+</sup>]: 253.1199, found 253.1196.

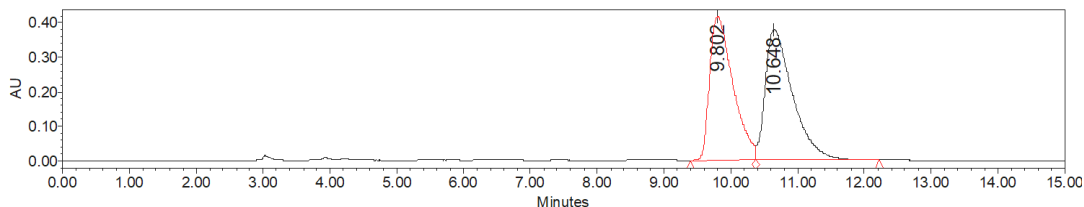

|   | Retention Time | Area     | % Area |
|---|----------------|----------|--------|
| 1 | 9.802          | 10138219 | 48.18  |
| 2 | 10.648         | 10905029 | 51.82  |

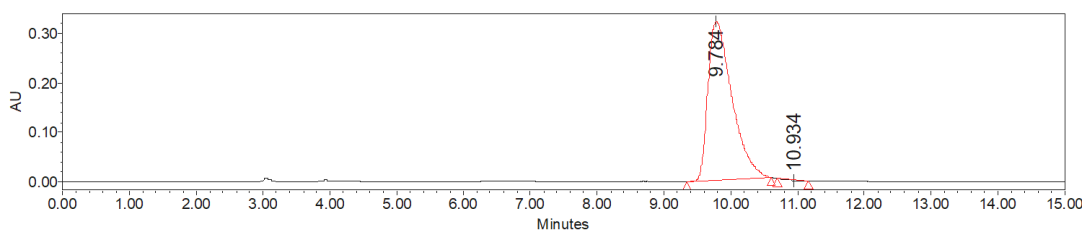

|   | Retention Time | Area    | % Area |
|---|----------------|---------|--------|
| 1 | 9.784          | 7986684 | 99.78  |
| 2 | 10.934         | 17768   | 0.22   |

**(4*R*)-8-methoxy-4-phenylchroman-2-ol (2l)**

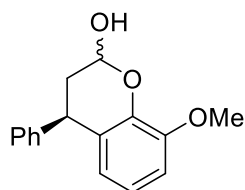

16 h, **L-PiPr<sub>2</sub>/Sc(OTf)<sub>3</sub>** (1/1, 5 mol% catalyst loading); colorless oil, 49.7 mg, 97% yield, 4.9:1 d.r.; [ $\alpha$ ]<sub>D</sub><sup>20</sup> = -137.4 (*c* = 0.45 in CH<sub>2</sub>Cl<sub>2</sub>, λ = 436 nm); <sup>1</sup>H NMR (400 MHz, CDCl<sub>3</sub>) δ 7.36 – 7.14 (m, 5H), 6.84 – 6.63 (m, 2H), 6.45 – 6.23 (m, 1H), 5.88 – 5.58 (m, 1H), 4.43 – 4.11 (m, 2H), 3.86 (s, 3H), 2.51 – 2.26 (m, 1H), 2.24 – 2.08 (m, 1H). <sup>13</sup>C{<sup>1</sup>H} NMR (100 MHz, CDCl<sub>3</sub>) δ 148.1, 144.3, 141.2, 128.8, 128.5, 126.7, 126.3, 121.5, 120.1, 109.3, 91.5, 55.7, 36.6, 36.0. IR (film): ν (cm<sup>-1</sup>) 3459, 1584, 1472, 1261, 1207, 1085, 1012, 956, 894, 762, 732, 700. HRMS (FTMS+c ESI) calcd for [C<sub>16</sub>H<sub>16</sub>O<sub>3</sub>+Na<sup>+</sup>]: 279.0992, found 279.0997.

**(*R*)-8-methoxy-4-phenylchroman-2-one (3l)**

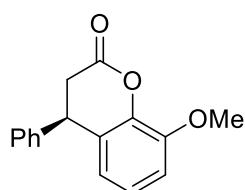

Colorless oil, 17.8 mg, 35% yield over two steps, 80% ee;  $[\alpha]^{20} = -105.8$  ( $c = 0.33$  in  $\text{CH}_2\text{Cl}_2$ ,  $\lambda = 436$  nm); HPLC (Daicel chiralcel ID, *n*-hexane/*i*-PrOH 80/20, 1.0 mL/min, 230 nm)  $t_{\text{R (minor)}} = 13.10$  min,  $t_{\text{R (major)}} = 15.61$  min;  $^1\text{H}$  NMR (400 MHz,  $\text{CDCl}_3$ )  $\delta$  7.37 – 7.23 (m, 3H), 7.21 – 7.08 (m, 2H), 7.08 – 6.97 (m, 1H), 6.95 – 6.84 (m, 1H), 6.62 – 6.46 (m, 1H), 4.34 (t,  $J = 6.6$  Hz, 1H), 3.92 (s, 3H), 3.19 – 2.88 (m, 2H).  $^{13}\text{C}\{^1\text{H}\}$  NMR (100 MHz,  $\text{CDCl}_3$ )  $\delta$  166.9, 147.8, 141.0, 140.3, 129.1, 127.6, 127.5, 126.8, 124.5, 119.7, 111.4, 56.1, 40.9, 36.8. IR (film):  $\nu(\text{cm}^{-1})$  1767, 1589, 1481, 1275, 1180, 1138, 1091, 910, 832, 770, 730, 700. HRMS (FTMS+c ESI) calcd for  $[\text{C}_{16}\text{H}_{14}\text{O}_3+\text{Na}^+]$ : 277.0835, found 277.0836.

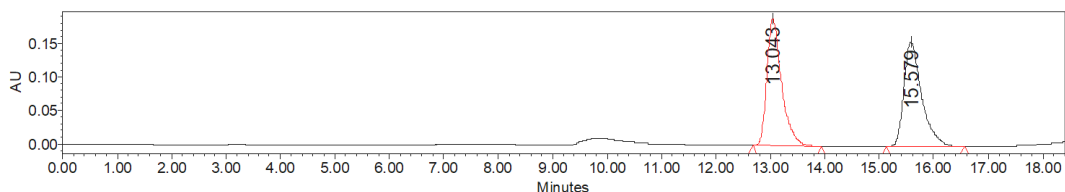

|   | Retention Time | Area    | % Area |
|---|----------------|---------|--------|
| 1 | 13.043         | 3556716 | 50.00  |
| 2 | 15.579         | 3557042 | 50.00  |

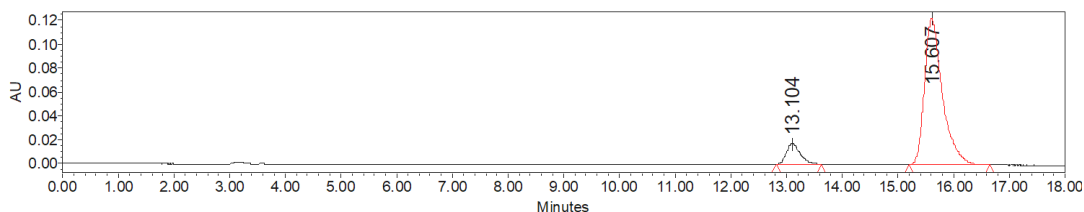

|   | Retention Time | Area    | % Area |
|---|----------------|---------|--------|
| 1 | 13.104         | 311094  | 10.18  |
| 2 | 15.607         | 2746126 | 89.82  |

**(4*R*)-8-chloro-4-phenylchroman-2-ol (2m)**

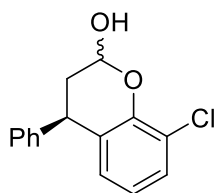

11 h, **L-PiPr<sub>2</sub>/Fe(OTf)<sub>2</sub>** (1/1, 5 mol% catalyst loading); colorless oil, 51.4 mg, 99% yield, 4.9:1 d.r.;  $[\alpha]^{20} = -217.9$  ( $c = 0.85$  in  $\text{CH}_2\text{Cl}_2$ ,  $\lambda = 436$  nm);  $^1\text{H}$  NMR (400 MHz,  $\text{CDCl}_3$ )  $\delta$  7.40 – 7.29 (m, 2H), 7.29 – 7.24 (m, 1H), 7.24 – 7.11 (m, 3H), 6.77 – 6.69 (m, 1H), 6.68 – 6.56 (m, 1H), 5.89 – 5.74 (m, 1H), 4.35 (dd,  $J = 11.6, 5.8$  Hz, 1H), 3.68 – 3.52 (m, 1H), 2.39 – 2.25 (m, 1H), 2.24 – 2.11 (m, 1H).  $^{13}\text{C}\{^1\text{H}\}$  NMR (100 MHz,  $\text{CDCl}_3$ )  $\delta$  147.6, 143.6, 128.7, 128.7, 128.4, 128.1, 127.5, 126.9, 121.7, 121.0, 91.8, 36.7, 35.7. IR (film):  $\nu(\text{cm}^{-1})$  3421, 1448, 1357, 1229, 1139, 1098, 1073, 1018, 946, 920, 889, 817, 761, 732, 700. HRMS (FTMS+c ESI) calcd for  $[\text{C}_{15}\text{H}_{13}^{35}\text{ClO}_2+\text{Na}^+]$ : 283.0496, found 283.0499; HRMS (FTMS+c ESI) calcd for  $[\text{C}_{15}\text{H}_{13}^{37}\text{ClO}_2+\text{Na}^+]$ : 285.0467, found 285.0466.

**(*R*)-8-chloro-4-phenylchroman-2-one (3m)**

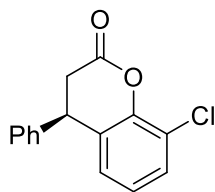

Colorless oil, 46.9 mg, 91% yield over two steps, 96% ee;  $[\alpha]^{21} = -210.4$  ( $c = 0.82$  in  $\text{CH}_2\text{Cl}_2$ ,  $\lambda = 436$  nm); HPLC (Daicel chiralcel ODH, *n*-hexane/*i*-PrOH 90/10, 1.0 mL/min, 240 nm)  $t_{R(\text{minor})} = 15.90$  min,  $t_{R(\text{major})} = 19.10$  min;  $^1\text{H}$  NMR (400 MHz,  $\text{CDCl}_3$ )  $\delta$  7.41 – 7.27 (m, 4H), 7.23 – 7.13 (m, 2H), 7.06 – 6.95 (m, 1H), 6.94 – 6.82 (m, 1H), 4.37 (t,  $J = 6.9$  Hz, 1H), 3.14 – 2.98 (m, 2H).  $^{13}\text{C}\{^1\text{H}\}$  NMR (100 MHz,  $\text{CDCl}_3$ )  $\delta$  166.2, 147.6, 139.6, 129.6, 129.2, 127.9, 127.7, 127.5, 126.7, 124.8, 122.1, 40.9, 36.6. IR (film):  $\nu(\text{cm}^{-1})$  1771, 1495, 1341, 1224, 1173, 1127, 974, 908, 797, 765, 731, 699. HRMS (FTMS+c ESI) calcd for  $[\text{C}_{15}\text{H}_{11}^{35}\text{ClO}_2+\text{Na}^+]$ : 281.0340, found 281.0334; HRMS (FTMS+c ESI) calcd for  $[\text{C}_{15}\text{H}_{11}^{37}\text{ClO}_2+\text{Na}^+]$ : 283.0310, found 283.0300.

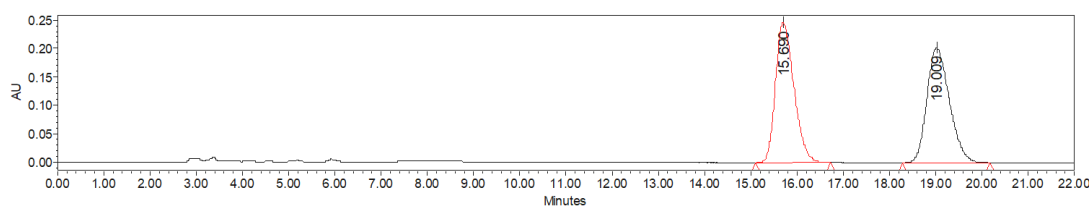

|   | Retention Time | Area    | % Area |
|---|----------------|---------|--------|
| 1 | 15.690         | 6842228 | 50.00  |
| 2 | 19.009         | 6843418 | 50.00  |

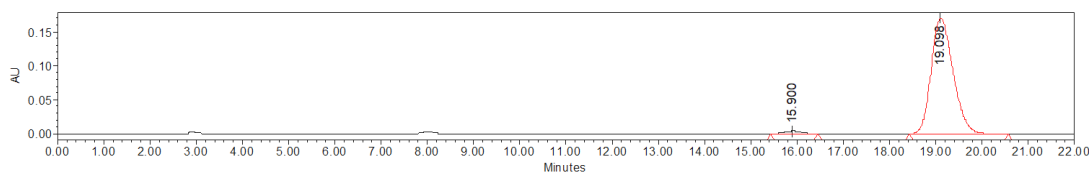

|   | Retention Time | Area    | % Area |
|---|----------------|---------|--------|
| 1 | 15.900         | 100907  | 1.78   |
| 2 | 19.098         | 5570358 | 98.22  |

#### (4R)-7-chloro-4-phenylchroman-2-ol (2n)

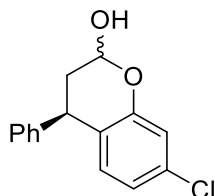

14 h, **L-PiPr<sub>2</sub>**/Fe(OTf)<sub>2</sub> (1/1, 1 mol% catalyst loading); colorless oil, 43.1 mg, 83% yield, 4.3:1 d.r.;  $[\alpha]^{22} = -130.5$  ( $c = 0.81$  in  $\text{CH}_2\text{Cl}_2$ ,  $\lambda = 436$  nm);  $^1\text{H}$  NMR (400 MHz,  $\text{CDCl}_3$ )  $\delta$  7.38 – 7.29 (m, 2H), 7.29 – 7.24 (m, 1H), 7.23 – 7.10 (m, 2H), 6.88 (d,  $J = 2.1$  Hz, 1H), 6.81 – 6.73 (m, 1H), 6.72 – 6.66 (m, 1H), 5.66 (d,  $J = 2.4$  Hz, 1H), 4.27 (dd,  $J = 11.4, 5.7$  Hz, 1H), 3.40 (s, 1H), 2.32 – 2.20 (m, 1H), 2.19 – 2.02 (m, 1H).  $^{13}\text{C}\{^1\text{H}\}$  NMR (100 MHz,  $\text{CDCl}_3$ )  $\delta$  152.4, 143.6, 132.8, 130.6, 128.7, 128.7, 126.9, 124.1, 121.2, 117.0, 91.5, 36.3, 35.8. IR (film):  $\nu(\text{cm}^{-1})$  3399,

1601, 1573, 1483, 1452, 1409, 1216, 1128, 1096, 1080, 1048, 1012, 920, 858, 756, 700. HRMS (FTMS+c ESI) calcd for  $[C_{15}H_{13}^{35}ClO_2+Na^+]$ : 283.0496, found 283.0500; HRMS (FTMS+c ESI) calcd for  $[C_{15}H_{13}^{37}ClO_2+Na^+]$ : 285.0467, found 285.0467.

**(R)-7-chloro-4-phenylchroman-2-one (3n)**

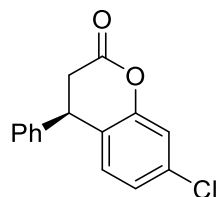

White solid, Mp: 96–100 °C, 35.3 mg, 68% yield over two steps, 94% ee;  $[\alpha]^{23} = -107.4$  ( $c = 0.59$  in  $CH_2Cl_2$ ,  $\lambda = 436$  nm); HPLC (Daicel chiralcel ODH, *n*-hexane/*i*-PrOH 90/10, 1.0 mL/min, 230 nm)  $t_{R(\text{minor})} = 15.54$  min,  $t_{R(\text{major})} = 22.41$  min;  $^1H$  NMR (400 MHz,  $CDCl_3$ )  $\delta$  7.41 – 7.26 (m, 3H), 7.20 – 7.11 (m, 3H), 7.09 – 7.10 (m, 1H), 6.95 – 6.86 (m, 1H), 4.32 (dd,  $J = 7.8, 6.3$  Hz, 1H), 3.21 – 2.97 (m, 2H).  $^{13}C\{^1H\}$  NMR (100 MHz,  $CDCl_3$ )  $\delta$  166.8, 152.1, 139.7, 134.0, 129.3, 129.2, 127.9, 127.5, 124.8, 124.4, 117.5, 40.3, 36.7. IR (film):  $\nu$  ( $cm^{-1}$ ) 1777, 1606, 1579, 1485, 1453, 1409, 1221, 1179, 1132, 1078, 946, 864, 821, 757, 699. HRMS (FTMS+c ESI) calcd for  $[C_{15}H_{11}^{35}ClO_2+Na^+]$ : 281.0340, found 281.0345; HRMS (FTMS+c ESI) calcd for  $[C_{15}H_{11}^{37}ClO_2+Na^+]$ : 283.0310, found 283.0313.

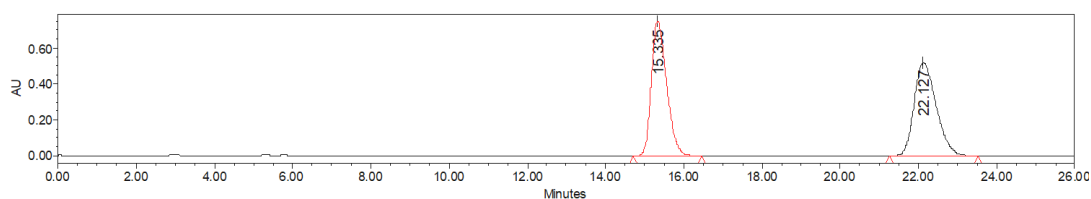

|   | Retention Time | Area     | % Area |
|---|----------------|----------|--------|
| 1 | 15.335         | 20448492 | 49.93  |
| 2 | 22.127         | 20506671 | 50.07  |

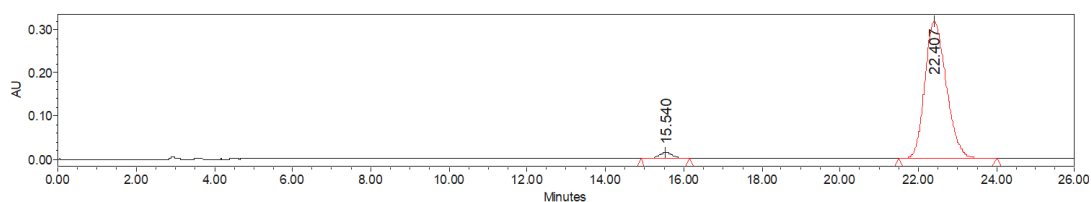

|   | Retention Time | Area     | % Area |
|---|----------------|----------|--------|
| 1 | 15.540         | 353520   | 2.83   |
| 2 | 22.407         | 12156271 | 97.17  |

**(4R)-6-methyl-4-phenylchroman-2-ol (2o)**

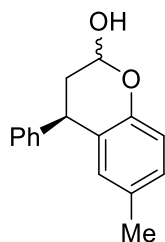

4 h, **L-PiPr<sub>2</sub>/Fe(OTf)<sub>2</sub>** (1/1, 1 mol% catalyst loading); colorless oil, 45.0 mg, 94% yield, 3.5:1 d.r.;  $[\alpha]^{19} = -76.1$  ( $c = 0.84$  in  $\text{CH}_2\text{Cl}_2$ ,  $\lambda = 436$  nm);  $^1\text{H NMR}$  (400 MHz,  $\text{CDCl}_3$ )  $\delta$  7.38 – 7.15 (m, 5H), 6.96 – 6.85 (m, 1H), 6.84 – 6.70 (m, 1H), 6.61 – 6.55 (m, 1H), 5.69 – 5.56 (m, 1H), 4.29 (dd,  $J = 10.9, 5.8$  Hz, 1H), 3.52 – 3.32 (m, 1H), 2.32 – 2.21 (m, 1H), 2.19 – 2.02 (m, 4H).  $^{13}\text{C}\{^1\text{H}\}$  NMR (100 MHz,  $\text{CDCl}_3$ )  $\delta$  149.6, 144.4, 130.2, 129.8, 128.8, 128.6, 128.5, 126.6, 124.9, 116.6, 91.3, 36.9, 36.3, 20.5. IR (film):  $\nu(\text{cm}^{-1})$  3417, 3026, 1494, 1451, 1272, 1239, 1211, 1128, 1092, 1054, 1018, 925, 893, 816, 756, 701. HRMS (FTMS+c ESI) calcd for  $[\text{C}_{16}\text{H}_{16}\text{O}_2 + \text{Na}^+]$ : 263.1043, found 263.1038.

**(R)-6-methyl-4-phenylchroman-2-one (3o)**

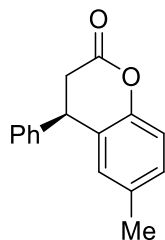

White solid, Mp: 108–111 °C, 34.8 mg, 73% yield over two steps, 99% ee;  $[\alpha]^{18} = -9.4$  ( $c = 0.72$  in  $\text{CH}_2\text{Cl}_2$ ,  $\lambda = 436$  nm); HPLC (Daicel chiralcel ODH, *n*-hexane/*i*-PrOH 90/10, 1.0 mL/min, 230 nm)  $t_{\text{R}(\text{minor})} = 10.81$  min,  $t_{\text{R}(\text{major})} = 12.87$  min;  $^1\text{H NMR}$  (400 MHz,  $\text{CDCl}_3$ )  $\delta$  7.37 – 7.24 (m, 3H), 7.21 – 7.12 (m, 2H), 7.12 – 7.05 (m, 1H), 7.05 – 6.99 (m, 1H), 6.82 – 6.74 (m, 1H), 4.29 (t,  $J = 6.7$  Hz, 1H), 3.11 – 2.88 (m, 2H), 2.25 (s, 3H).  $^{13}\text{C}\{^1\text{H}\}$  NMR (100 MHz,  $\text{CDCl}_3$ )  $\delta$  167.8, 149.6, 140.5, 134.3, 129.3, 129.1, 128.6, 127.6, 127.5, 125.3, 116.8, 40.7, 37.1, 20.7. IR (film):  $\nu(\text{cm}^{-1})$  3029, 1768, 1494, 1454, 1276, 1244, 1199, 1144, 970, 927, 895, 818, 750, 700. HRMS (FTMS+c ESI) calcd for  $[\text{C}_{16}\text{H}_{14}\text{O}_2 + \text{Na}^+]$ : 261.0886, found 261.0893.

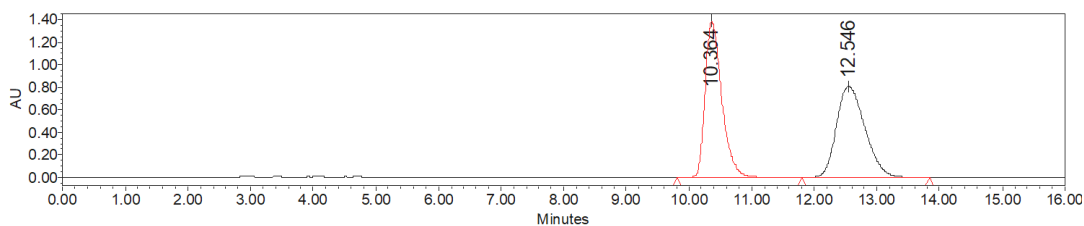

|   | Retention Time | Area     | % Area |
|---|----------------|----------|--------|
| 1 | 10.364         | 25420691 | 50.05  |
| 2 | 12.546         | 25370920 | 49.95  |



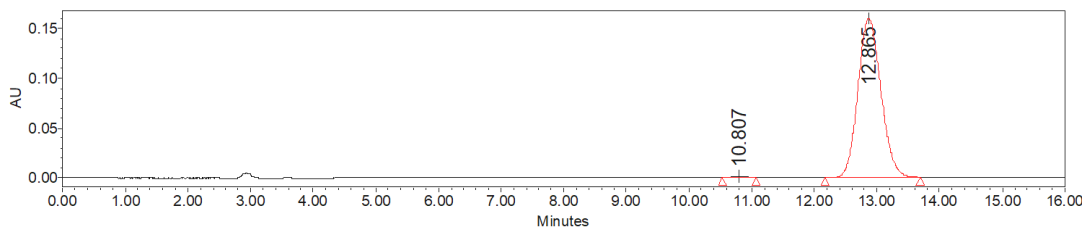

|   | Retention Time | Area    | % Area |
|---|----------------|---------|--------|
| 1 | 10.807         | 23793   | 0.58   |
| 2 | 12.865         | 4048689 | 99.42  |

**(4*R*)-6-methoxy-4-phenylchroman-2-ol (2p)**

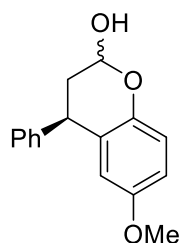

4 h, **L-PiPr<sub>2</sub>/Fe(OTf)<sub>2</sub>** (1/1, 1 mol% catalyst loading); colorless oil, 49.9 mg, 97% yield, 4.0:1 d.r.;  $[\alpha]^{23} = -49.9$  ( $c = 0.96$  in  $\text{CH}_2\text{Cl}_2$ ,  $\lambda = 436$  nm);  $^1\text{H NMR}$  (400 MHz,  $\text{CDCl}_3$ )  $\delta$  7.36 – 7.28 (m, 2H), 7.27 – 7.16 (m, 3H), 6.85 – 6.76 (m, 1H), 6.74 – 6.67 (m, 1H), 6.36 – 6.28 (m, 1H), 5.69 – 5.57 (m, 1H), 4.30 (dd,  $J = 11.1, 5.8$  Hz, 1H), 3.60 (s, 3H), 3.47 (s, 1H), 2.31 – 2.20 (m, 1H), 2.18 – 2.00 (m, 1H).  $^{13}\text{C}\{^1\text{H}\}$  NMR (100 MHz,  $\text{CDCl}_3$ )  $\delta$  153.7, 145.8, 144.1, 128.8, 128.6, 126.7, 126.0, 117.4, 114.4, 113.8, 91.2, 55.6, 37.1, 36.2. IR (film):  $\nu$  ( $\text{cm}^{-1}$ ) 3421, 2936, 1491, 1453, 1422, 1273, 1151, 1092, 1039, 1014, 920, 894, 812, 761, 701. HRMS (FTMS+c ESI) calcd for  $[\text{C}_{16}\text{H}_{16}\text{O}_3 + \text{Na}^+]$ : 279.0992, found 279.0988.

**(*R*)-6-methoxy-4-phenylchroman-2-one (3p)**

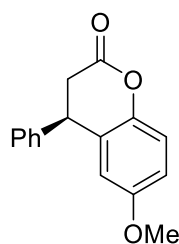

Colorless oil, 19.2 mg, 38% yield over two steps, 98% ee;  $[\alpha]^{21} = +20.8$  ( $c = 0.34$  in  $\text{CH}_2\text{Cl}_2$ ,  $\lambda = 436$  nm); HPLC (Daicel chiralcel ODH, *n*-hexane/*i*-PrOH 90/10, 1.0 mL/min, 230 nm)  $t_{\text{R}(\text{major})} = 19.55$  min,  $t_{\text{R}(\text{minor})} = 22.13$  min;  $^1\text{H NMR}$  (400 MHz,  $\text{CDCl}_3$ )  $\delta$  7.39 – 7.26 (m, 3H), 7.20 – 7.12 (m, 2H), 7.07 (d,  $J = 8.9$  Hz, 1H), 6.82 (dd,  $J = 8.9, 3.0$  Hz, 1H), 6.49 (dd,  $J = 2.9, 0.5$  Hz, 1H), 4.30 (t,  $J = 7.2$  Hz, 1H), 3.71 (s, 3H), 3.11 – 2.91 (m, 2H).  $^{13}\text{C}\{^1\text{H}\}$  NMR (100 MHz,  $\text{CDCl}_3$ )  $\delta$  167.8, 156.3, 145.6, 140.1, 129.1, 127.7, 127.5, 126.7, 117.9, 113.7, 113.5, 55.6, 40.9, 37.0. IR (film):  $\nu$  ( $\text{cm}^{-1}$ ) 2920, 1758, 1490, 1454, 1426, 1274, 1193, 1137, 1033, 928, 896, 815, 767, 700. HRMS (FTMS+c ESI) calcd for  $[\text{C}_{16}\text{H}_{14}\text{O}_3 + \text{Na}^+]$ : 277.0835, found 277.0836.

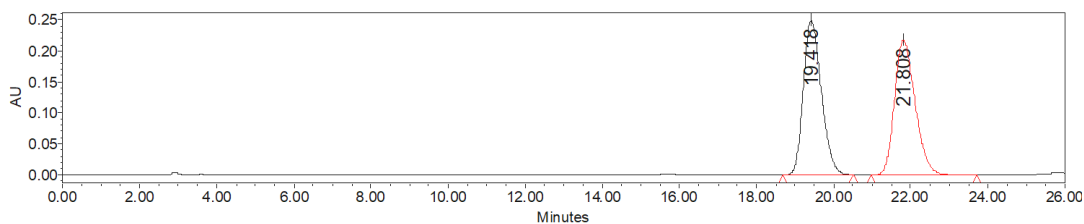

|   | Retention Time | Area    | % Area |
|---|----------------|---------|--------|
| 1 | 19.418         | 8127572 | 50.05  |
| 2 | 21.808         | 8109773 | 49.95  |

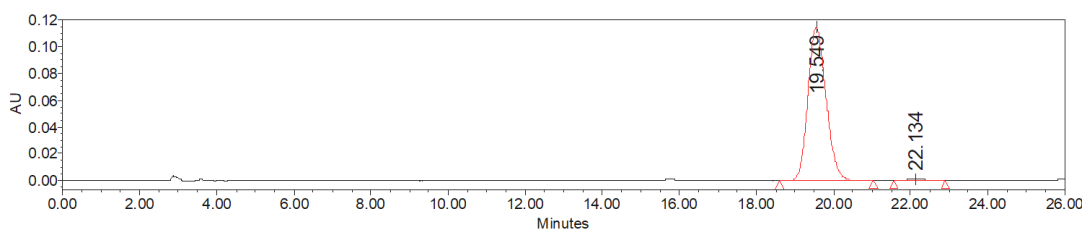

|   | Retention Time | Area    | % Area |
|---|----------------|---------|--------|
| 1 | 19.549         | 3726033 | 99.02  |
| 2 | 22.134         | 36904   | 0.98   |

**(4*R*)-6-fluoro-4-phenylchroman-2-ol (2q)**

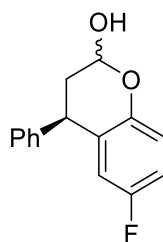

3 h, **L-PiPr<sub>2</sub>/Fe(OTf)<sub>2</sub>** (1/1, 0.1 mol% catalyst loading); colorless oil, 48.4 mg, 99% yield, 4.2:1 d.r.;  $[\alpha]^{24} = -179.1$  ( $c = 0.93$  in  $\text{CH}_2\text{Cl}_2$ ,  $\lambda = 436$  nm);  $^1\text{H NMR}$  (400 MHz,  $\text{CDCl}_3$ )  $\delta$  7.42 – 7.27 (m, 3H), 7.25 – 7.15 (m, 2H), 6.91 – 6.72 (m, 2H), 6.52 – 6.39 (m, 1H), 5.68 (dd,  $J = 5.9, 3.1$  Hz, 1H), 4.32 (dd,  $J = 11.6, 5.8$  Hz, 1H), 3.43 (dd,  $J = 3.6, 1.8$  Hz, 1H), 2.34 – 2.21 (m, 1H), 2.20 – 2.07 (m, 1H).  $^{13}\text{C}\{^1\text{H}\}$  NMR (100 MHz,  $\text{CDCl}_3$ )  $\delta$  157.1 (d,  $J = 237.0$  Hz), 147.7 (d,  $J = 2.0$  Hz), 143.4, 128.8, 128.7, 127.0, 126.8 (d,  $J = 15.9$  Hz), 117.8 (d,  $J = 7.9$  Hz), 115.5 (d,  $J = 23.3$  Hz), 114.6 (d,  $J = 23.1$  Hz), 91.3, 36.8, 35.6.  $^{19}\text{F}\{^1\text{H}\}$  NMR (376 MHz,  $\text{CDCl}_3$ )  $\delta$  -122.81. IR (film):  $\nu$  ( $\text{cm}^{-1}$ ) 3403, 1489, 1424, 1255, 1189, 1135, 1092, 1054, 1017, 935, 815, 757, 701. HRMS (FTMS+c ESI) calcd for  $[\text{C}_{15}\text{H}_{13}\text{FO}_2 + \text{H}^+]$ : 245.0972, found 245.0965.

**(*R*)-6-fluoro-4-phenylchroman-2-one (3q)**

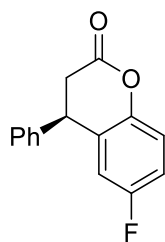

Colorless oil, 38.2 mg, 79% yield over two steps, 99% ee;  $[\alpha]^{22} = -101.5$  ( $c = 0.72$  in  $\text{CH}_2\text{Cl}_2$ ,  $\lambda = 436$  nm); HPLC (Daicel chiralcel ODH, *n*-hexane/*i*-PrOH 90/10, 1.0 mL/min, 254 nm)  $t_{R(\text{minor})} = 17.15$  min,  $t_{R(\text{major})} = 18.59$  min;  $^1\text{H}$  NMR (400 MHz,  $\text{CDCl}_3$ )  $\delta$  7.44 – 7.27 (m, 3H), 7.21 – 7.13 (m, 2H), 7.13 – 7.07 (m, 1H), 7.03 – 6.91 (m, 1H), 6.73 – 6.59 (m, 1H), 4.32 (dd,  $J = 8.3, 6.2$  Hz, 1H), 3.13 – 2.92 (m, 2H).  $^{13}\text{C}\{^1\text{H}\}$  NMR (100 MHz,  $\text{CDCl}_3$ )  $\delta$  167.18, 159.1 (d,  $J = 242.5$  Hz), 147.6 (d,  $J = 2.8$  Hz), 139.38, 129.26, 127.94, 127.6 (d,  $J = 7.7$  Hz), 127.51, 118.4 (d,  $J = 8.4$  Hz), 115.5 (d,  $J = 23.4$  Hz), 114.8 (d,  $J = 24.4$  Hz), 40.67, 36.47.  $^{19}\text{F}\{^1\text{H}\}$  NMR (376 MHz,  $\text{CDCl}_3$ )  $\delta$  –117.46. IR (film):  $\nu$  ( $\text{cm}^{-1}$ ) 1769, 1488, 1428, 1243, 1185, 1138, 973, 902, 820, 757, 700. HRMS (FTMS+c ESI) calcd for  $[\text{C}_{15}\text{H}_{11}\text{FO}_2+\text{H}^+]$ : 243.0816, found 243.0816.

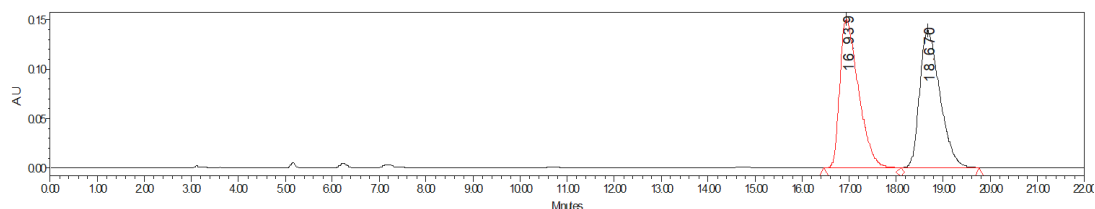

|   | Retention Time | Area    | % Area |
|---|----------------|---------|--------|
| 1 | 16.939         | 4144748 | 50.03  |
| 2 | 18.670         | 4139992 | 49.97  |

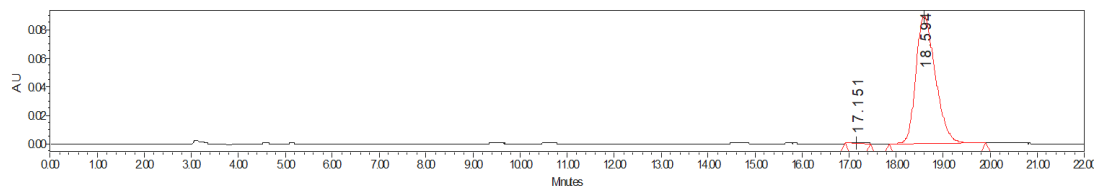

|   | Retention Time | Area    | % Area |
|---|----------------|---------|--------|
| 1 | 17.151         | 6784    | 0.26   |
| 2 | 18.594         | 2572513 | 99.74  |

**(4R)-6-chloro-4-phenylchroman-2-ol (2r)**

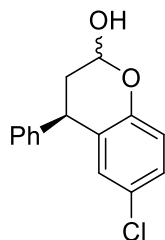

11 h, **L-PIPr**<sub>2</sub>/Fe(OTf)<sub>2</sub> (1/1, 1 mol% catalyst loading); colorless oil, 51.8 mg, 99% yield, 4.0:1 d.r.;  $[\alpha]^{23} = -13.0$  ( $c = 0.88$  in  $\text{CH}_2\text{Cl}_2$ ,  $\lambda = 436$  nm);  $^1\text{H}$  NMR (400 MHz,  $\text{CDCl}_3$ )  $\delta$  7.39 – 7.27 (m, 3H), 7.24 – 7.15 (m, 2H), 7.10

(dd,  $J = 8.7, 2.4$  Hz, 1H), 6.85 – 6.78 (m, 1H), 6.78 – 6.67 (m, 1H), 5.72 – 5.63 (m, 1H), 4.30 (dd,  $J = 11.4, 5.7$  Hz, 1H), 3.40 (d,  $J = 1.6$  Hz, 1H), 2.31 – 2.24 (m, 1H), 2.20 – 2.08 (m, 1H).  $^{13}\text{C}\{^1\text{H}\}$  NMR (100 MHz,  $\text{CDCl}_3$ )  $\delta$  150.4, 143.3, 129.1, 128.8, 128.7, 127.9, 127.1, 127.03, 125.8, 118.3, 91.3, 36.7, 35.7. IR (film):  $\nu$  ( $\text{cm}^{-1}$ ) 3397, 1476, 1405, 1260, 1230, 1176, 1120, 1094, 1052, 1014, 917, 896, 815, 759, 736, 699. HRMS (FTMS+c ESI) calcd for  $[\text{C}_{15}\text{H}_{13}^{35}\text{ClO}_2+\text{Na}^+]$ : 283.0496, found 283.0500; HRMS (FTMS+c ESI) calcd for  $[\text{C}_{15}\text{H}_{13}^{37}\text{ClO}_2+\text{Na}^+]$ : 285.0467, found 285.0471.

**(R)-6-chloro-4-phenylchroman-2-one (3r)**

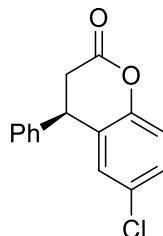

Colorless oil, 36.9 mg, 72% yield over two steps, 98% ee;  $[\alpha]^{22} = +52.3$  ( $c = 0.63$  in  $\text{CH}_2\text{Cl}_2$ ,  $\lambda = 436$  nm); HPLC (Daicel chiralcel ODH, *n*-hexane/*i*-PrOH 90/10, 1.0 mL/min, 230 nm)  $t_{\text{R}(\text{minor})} = 16.94$  min,  $t_{\text{R}(\text{major})} = 19.99$  min;  $^1\text{H}$  NMR (400 MHz,  $\text{CDCl}_3$ )  $\delta$  7.42 – 7.29 (m, 3H), 7.28 – 7.24 (m, 1H), 7.18 – 7.12 (m, 2H), 7.07 (d,  $J = 8.7$  Hz, 1H), 6.94 (dd,  $J = 2.5, 0.7$  Hz, 1H), 4.31 (t,  $J = 7.6$  Hz, 1H), 3.17 – 2.94 (m, 2H).  $^{13}\text{C}\{^1\text{H}\}$  NMR (100 MHz,  $\text{CDCl}_3$ )  $\delta$  166.9, 150.2, 139.4, 129.8, 129.3, 128.8, 128.1, 128.0, 127.5, 127.5, 118.5, 40.6, 36.5. IR (film):  $\nu$  ( $\text{cm}^{-1}$ ) 1774, 1478, 1413, 1263, 1218, 1174, 1136, 1085, 968, 924, 881, 822, 762, 699. HRMS (FTMS+c ESI) calcd for  $[\text{C}_{15}\text{H}_{11}^{35}\text{ClO}_2+\text{Na}^+]$ : 281.0340, found 281.0342; HRMS (FTMS+c ESI) calcd for  $[\text{C}_{15}\text{H}_{11}^{37}\text{ClO}_2+\text{Na}^+]$ : 283.0310, found 283.0318.

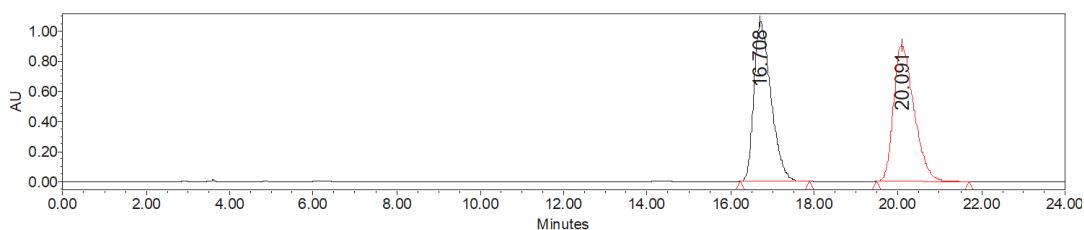

|   | Retention Time | Area     | % Area |
|---|----------------|----------|--------|
| 1 | 16.708         | 30343455 | 49.60  |
| 2 | 20.091         | 30833440 | 50.40  |

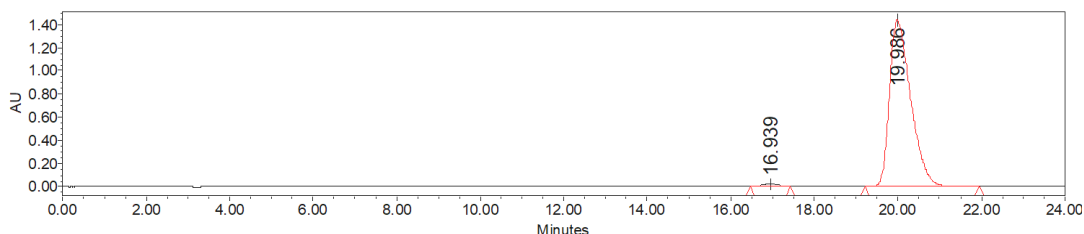

|   | Retention Time | Area     | % Area |
|---|----------------|----------|--------|
| 1 | 16.939         | 596487   | 1.16   |
| 2 | 19.986         | 50844763 | 98.84  |

**(4*R*)-6-bromo-4-phenylchroman-2-ol (2s)**

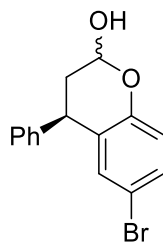

3 h, **L-PIPr<sub>2</sub>/Fe(OTf)<sub>2</sub>** (1/1, 1 mol% catalyst loading); colorless oil, 58.0 mg, 95% yield, 3.9:1 d.r.;  $[\alpha]^{20} = +61.8$  ( $c = 1.08$  in  $\text{CH}_2\text{Cl}_2$ ,  $\lambda = 436$  nm); <sup>1</sup>H NMR (400 MHz,  $\text{CDCl}_3$ )  $\delta$  7.39 – 7.27 (m, 3H), 7.26 – 7.16 (m, 3H), 6.93 – 6.82 (m, 1H), 6.81 – 6.72 (m, 1H), 5.67 (dd,  $J = 5.8, 3.0$  Hz, 1H), 4.31 (dd,  $J = 11.3, 5.7$  Hz, 1H), 3.43 (d,  $J = 2.1$  Hz, 1H), 2.32 – 2.21 (m, 1H), 2.19 – 2.07 (m, 1H). <sup>13</sup>C{<sup>1</sup>H} NMR (100 MHz,  $\text{CDCl}_3$ )  $\delta$  151.0, 143.2, 132.0, 130.8, 128.8, 128.7, 127.7, 127.0, 118.7, 113.2, 91.4, 36.7, 35.7. IR (film):  $\nu$  ( $\text{cm}^{-1}$ ) 3408, 1476, 1401, 1263, 1229, 1178, 1126, 1094, 1051, 1015, 918, 894, 815, 757, 701. HRMS (FTMS+c ESI) calcd for  $[\text{C}_{15}\text{H}_{13}^{79}\text{BrO}_2 + \text{Na}^+]$ : 326.9991, found 326.9996; HRMS (FTMS+c ESI) calcd for  $[\text{C}_{15}\text{H}_{13}^{81}\text{BrO}_2 + \text{Na}^+]$ : 328.9971, found 328.9976.

**(*R*)-6-bromo-4-phenylchroman-2-one (3s)**

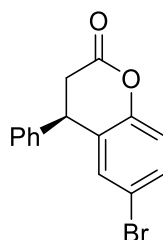

White solid, Mp: 128–131 °C, 45.5 mg, 76% yield over two steps, 99% ee;  $[\alpha]^{22} = +99.1$  ( $c = 0.71$  in  $\text{CH}_2\text{Cl}_2$ ,  $\lambda = 436$  nm); HPLC (Daicel chiralcel ODH, *n*-hexane/*i*-PrOH 90/10, 1.0 mL/min, 230 nm)  $t_{\text{R}(\text{minor})} = 18.40$  min,  $t_{\text{R}(\text{major})} = 24.48$  min; <sup>1</sup>H NMR (400 MHz,  $\text{CDCl}_3$ )  $\delta$  7.44 – 7.34 (m, 3H), 7.34 – 7.28 (m, 1H), 7.19 – 7.12 (m, 2H), 7.10 (dd,  $J = 2.3, 0.7$  Hz, 1H), 7.02 (d,  $J = 8.6$  Hz, 1H), 4.31 (t,  $J = 6.8$  Hz, 1H), 3.11 – 2.92 (m, 2H). <sup>13</sup>C{<sup>1</sup>H} NMR (100 MHz,  $\text{CDCl}_3$ )  $\delta$  166.8, 150.7, 139.4, 131.8, 131.0, 129.3, 128.0, 127.9, 127.4, 118.9, 117.3, 40.5, 36.6. IR (film):  $\nu$  ( $\text{cm}^{-1}$ ) 1773, 1475, 1408, 1268, 1220, 1173, 1135, 1075, 967, 921, 882, 819, 757, 700. HRMS (FTMS+c ESI) calcd for  $[\text{C}_{15}\text{H}_{11}^{79}\text{BrO}_2 + \text{Na}^+]$ : 324.9835, found 324.9834; HRMS (FTMS+c ESI) calcd for  $[\text{C}_{15}\text{H}_{11}^{81}\text{BrO}_2 + \text{Na}^+]$ : 326.9814, found 326.9815.

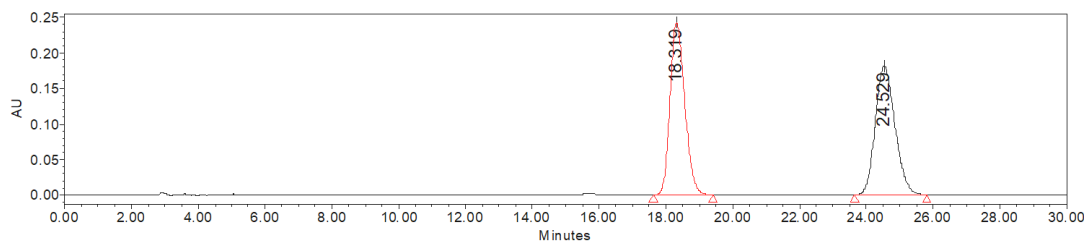

|   | Retention Time | Area    | % Area |
|---|----------------|---------|--------|
| 1 | 18.319         | 7393870 | 49.94  |
| 2 | 24.529         | 7410722 | 50.06  |

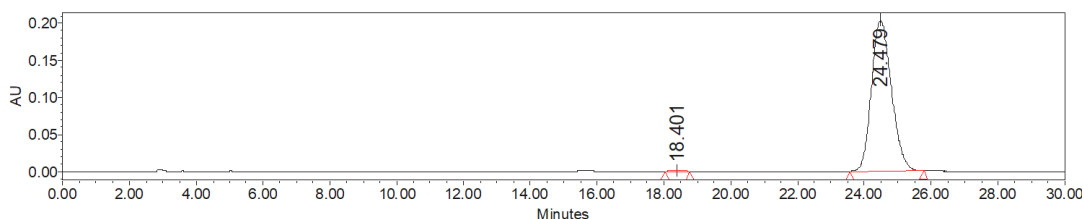

|   | Retention Time | Area    | % Area |
|---|----------------|---------|--------|
| 1 | 18.401         | 29679   | 0.35   |
| 2 | 24.479         | 8447951 | 99.65  |

**(4*R*)-5-fluoro-4-phenylchroman-2-ol (2t)**

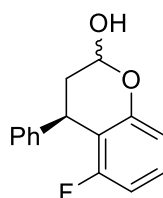

11 h, **L-PiPr<sub>2</sub>/Sc(OTf)<sub>3</sub>** (1/1, 5 mol% catalyst loading); white solid, Mp: 112–116 °C, 34.0 mg, 70% yield, 4.5:1 d.r.;  $[\alpha]^{18} = -152.6$  ( $c = 0.50$  in CH<sub>2</sub>Cl<sub>2</sub>,  $\lambda = 436$  nm); <sup>1</sup>H NMR (400 MHz, CDCl<sub>3</sub>)  $\delta$  7.36 – 7.25 (m, 2H), 7.25 – 7.05 (m, 4H), 6.82 – 6.68 (m, 1H), 6.68 – 6.48 (m, 1H), 5.38 (q,  $J = 5.1$  Hz, 1H), 4.42 (t,  $J = 5.7$  Hz, 1H), 3.52 – 3.35 (m, 1H), 2.32 – 2.02 (m, 2H). <sup>13</sup>C{<sup>1</sup>H} NMR (100 MHz, CDCl<sub>3</sub>)  $\delta$  161.0 (d,  $J = 245.6$  Hz), 154.4 (d,  $J = 7.0$  Hz), 144.2, 128.7, 128.6, 127.4, 126.6, 112.6 (d,  $J = 3.1$  Hz), 111.9 (d,  $J = 19.7$  Hz), 107.7 (d,  $J = 21.4$  Hz), 91.5, 36.9, 34.5. <sup>19</sup>F{<sup>1</sup>H} NMR (376 MHz, CDCl<sub>3</sub>)  $\delta$  -113.33. IR (film):  $\nu$  (cm<sup>-1</sup>) 3400, 1622, 1585, 1465, 1310, 1260, 1130, 1048, 982, 884, 757, 702. HRMS (FTMS+c ESI) calcd for [C<sub>15</sub>H<sub>13</sub>FO<sub>2</sub>+Na<sup>+</sup>]: 267.0792, found 267.0795.

**(*R*)-5-fluoro-4-phenylchroman-2-one (3t)**

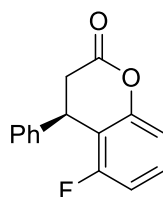

White solid, Mp: 108–114 °C, 30.1 mg, 62% yield over two steps, 89% ee;  $[\alpha]^{20} = -170.8$  ( $c = 0.58$  in CH<sub>2</sub>Cl<sub>2</sub>,  $\lambda = 436$  nm); HPLC (Daicel chiralcel ODH, *n*-hexane/*i*-PrOH 90/10, 1.0 mL/min, 230 nm)  $t_{R(\text{minor})} = 9.37$  min,  $t_{R(\text{major})} = 10.84$  min; <sup>1</sup>H NMR (400 MHz, CDCl<sub>3</sub>)  $\delta$  7.34 – 7.21 (m, 4H), 7.16 – 7.08 (m, 2H), 7.01 – 6.94 (m, 1H), 6.93 – 6.85 (m, 1H), 4.64 (dd,  $J = 6.1, 2.8$  Hz, 1H), 3.14 – 3.00 (m, 2H). <sup>13</sup>C{<sup>1</sup>H} NMR (100 MHz, CDCl<sub>3</sub>)  $\delta$  166.5, 159.6 (d,  $J = 246.7$  Hz), 152.6 (d,  $J = 6.5$  Hz), 140.0, 129.4 (d,  $J = 9.5$  Hz), 129.1, 127.6, 126.6, 113.5 (d,  $J = 21.8$  Hz), 113.0 (d,  $J = 3.4$  Hz), 111.6 (d,  $J = 21.3$  Hz), 36.3, 34.7. <sup>19</sup>F{<sup>1</sup>H} NMR (376 MHz, CDCl<sub>3</sub>)  $\delta$  -116.47. IR (film):  $\nu$  (cm<sup>-1</sup>) 1772, 1624, 1594, 1467, 1342, 1253, 1182, 1131, 1030, 966, 880, 793, 745, 698. HRMS (FTMS+c ESI) calcd for [C<sub>15</sub>H<sub>11</sub>FO<sub>2</sub>+Na<sup>+</sup>]: 265.0635, found 265.0639.

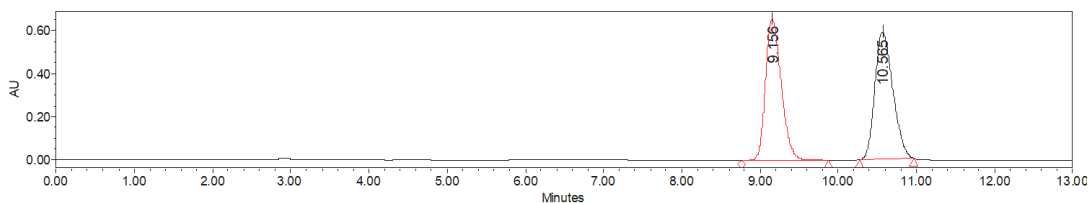

|   | Retention Time | Area    | % Area |
|---|----------------|---------|--------|
| 1 | 9.156          | 9098559 | 49.11  |
| 2 | 10.565         | 9429035 | 50.89  |

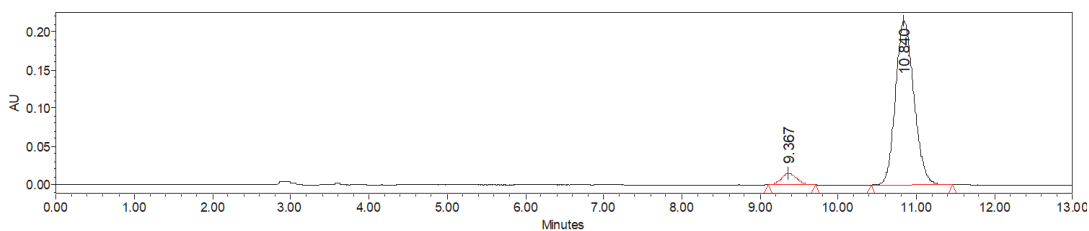

|   | Retention Time | Area    | % Area |
|---|----------------|---------|--------|
| 1 | 9.367          | 203344  | 5.49   |
| 2 | 10.840         | 3498607 | 94.51  |

**(1*R*)-1-phenyl-2,3-dihydro-1H-benzo[*f*]chromen-3-ol (2u)**

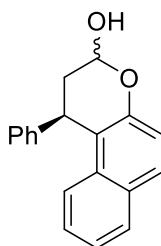

11 h, **L-RaPr<sub>2</sub>/Fe(OTf)<sub>2</sub>** (1/1, 10 mol% catalyst loading) in CH<sub>2</sub>ClCH<sub>2</sub>Cl; white solid, Mp: 160–164 °C, 33.3 mg, 60% yield, 4.9:1 d.r.; [α]<sup>19</sup> = –225.2 (c = 0.44 in CH<sub>2</sub>Cl<sub>2</sub>, λ = 436 nm); <sup>1</sup>H NMR (400 MHz, CDCl<sub>3</sub>) δ 7.82 – 7.67 (m, 2H), 7.49 – 7.39 (m, 1H), 7.32 – 7.07 (m, 8H), 5.50 – 5.27 (m, 1H), 4.85 – 4.56 (m, 1H), 3.22 (d, J = 6.5 Hz, 1H), 2.47 – 2.17 (m, 2H). <sup>13</sup>C{<sup>1</sup>H} NMR (100 MHz, CDCl<sub>3</sub>) δ 151.8, 145.1, 132.4, 129.5, 129.4, 128.7, 128.4, 128.0, 126.5, 126.5, 123.4, 123.4, 118.7, 113.9, 91.4, 37.9, 37.7. IR (film): ν (cm<sup>-1</sup>) 3386, 1622, 1598, 1454, 1398, 1344, 1230, 1121, 1063, 1020, 894, 821, 745, 698. HRMS (FTMS+c ESI) calcd for [C<sub>19</sub>H<sub>16</sub>O<sub>2</sub>+Na<sup>+</sup>]: 299.1043, found 299.1039.

**(*R*)-1-phenyl-1,2-dihydro-3H-benzo[*f*]chromen-3-one (3u)**

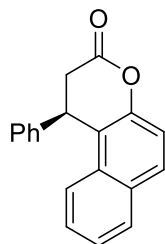

Pale yellow solid, Mp: 150–154 °C, 32.8 mg, 60% yield over two steps, 95% ee;  $[\alpha]^{20} = -147.9$  ( $c = 0.33$  in  $\text{CH}_2\text{Cl}_2$ ,  $\lambda = 436$  nm); HPLC (Daicel chiralcel IC, *n*-hexane/*i*-PrOH 80/20, 1.0 mL/min, 230 nm)  $t_{R(\text{major})} = 11.56$  min,  $t_{R(\text{minor})} = 13.10$  min;  $^1\text{H NMR}$  (400 MHz,  $\text{CDCl}_3$ )  $\delta$  8.01 – 7.71 (m, 3H), 7.51 – 7.40 (m, 2H), 7.39 – 7.33 (m, 1H), 7.31 – 7.05 (m, 5H), 4.94 (dd,  $J = 6.5, 2.0$  Hz, 1H), 3.31 – 3.07 (m, 2H).  $^{13}\text{C}\{^1\text{H}\}$  NMR (100 MHz,  $\text{CDCl}_3$ )  $\delta$  167.1, 149.7, 140.5, 131.0, 130.9, 129.9, 129.2, 128.7, 127.5, 127.4, 126.9, 125.2, 123.0, 117.5, 117.5, 37.6, 37.4. IR (film):  $\nu$  ( $\text{cm}^{-1}$ ) 1776, 1513, 1458, 1250, 1215, 1179, 1134, 969, 885, 816, 749, 701. HRMS (FTMS+c ESI) calcd for  $[\text{C}_{19}\text{H}_{14}\text{O}_2 + \text{Na}^+]$ : 297.0886, found 297.0890.

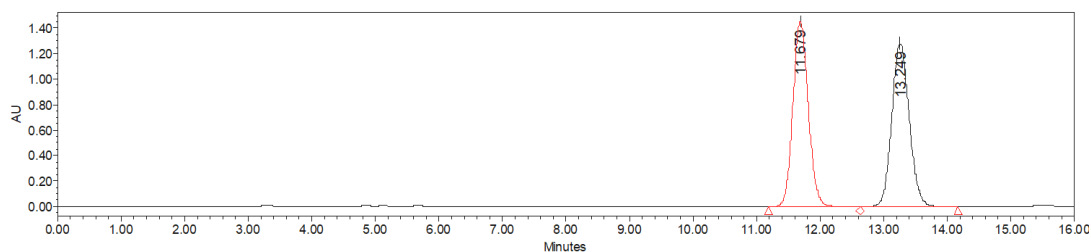

|   | Retention Time | Area     | % Area |
|---|----------------|----------|--------|
| 1 | 11.679         | 24324759 | 49.95  |
| 2 | 13.249         | 24374078 | 50.05  |

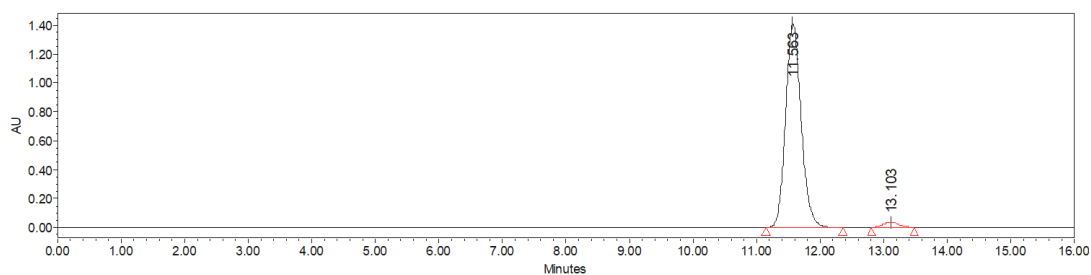

|   | Retention Time | Area     | % Area |
|---|----------------|----------|--------|
| 1 | 11.563         | 23951489 | 97.52  |
| 2 | 13.103         | 610085   | 2.48   |

**(1R)-1-(3-fluorophenyl)-2,3-dihydro-1H-benzo[f]chromen-3-ol (2v)**



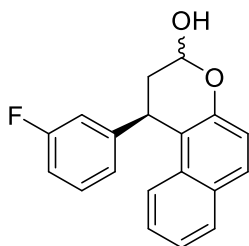

15 h, **L-RaPr<sub>2</sub>/Fe(OTf)<sub>2</sub>** (1/1, 10 mol% catalyst loading) in CHCl<sub>3</sub>; colorless oil, 46.2 mg, 79% yield, 6.1:1 d.r.;  $[\alpha]^{18} = -194.7$  ( $c = 0.66$  in CH<sub>2</sub>Cl<sub>2</sub>,  $\lambda = 436$  nm); <sup>1</sup>H NMR (400 MHz, CDCl<sub>3</sub>)  $\delta$  7.82 – 7.68 (m, 2H), 7.45 – 7.34 (m, 1H), 7.30 – 7.11 (m, 4H), 6.95 – 6.66 (m, 3H), 5.75 – 5.20 (m, 1H), 4.85 – 4.55 (m, 1H), 3.44 (d,  $J = 6.7$  Hz, 1H), 2.43 – 2.22 (m, 2H). <sup>13</sup>C{<sup>1</sup>H} NMR (100 MHz, CDCl<sub>3</sub>)  $\delta$  163.0 (d,  $J = 244.9$  Hz), 151.7, 147.8 (d,  $J = 6.5$  Hz), 132.2, 130.2 (d,  $J = 8.2$  Hz), 129.6, 129.5, 128.5, 126.7 (d,  $J = 2.8$  Hz), 123.6, 123.5, 123.2, 118.7, 115.0 (d,  $J = 21.6$  Hz), 113.5 (d,  $J = 21.0$  Hz), 113.2, 91.3, 37.6, 37.4. <sup>19</sup>F{<sup>1</sup>H} NMR (376 MHz, CDCl<sub>3</sub>)  $\delta$  -112.57. IR (film):  $\nu$  (cm<sup>-1</sup>) 3403, 1618, 1591, 1483, 1442, 1265, 1229, 1130, 1057, 993, 816, 745, 700. HRMS (FTMS+c ESI) calcd for [C<sub>19</sub>H<sub>15</sub>FO<sub>2</sub>+Na<sup>+</sup>]: 317.0948, found 317.0958.

**(R)-1-(3-fluorophenyl)-1,2-dihydro-3H-benzo[f]chromen-3-one (3v)**

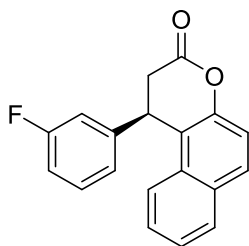

Yellow oil, 39.7 mg, 68% yield over two steps, 95% ee;  $[\alpha]^{19} = -146.7$  ( $c = 0.67$  in CH<sub>2</sub>Cl<sub>2</sub>,  $\lambda = 436$  nm); HPLC (Daicel chiralcel IA, *n*-hexane/*i*-PrOH 95/5, 1.0 mL/min, 230 nm)  $t_{R(\text{minor})} = 11.80$  min,  $t_{R(\text{major})} = 12.96$  min; <sup>1</sup>H NMR (400 MHz, CDCl<sub>3</sub>)  $\delta$  7.96 – 7.82 (m, 2H), 7.81 – 7.71 (m, 1H), 7.55 – 7.39 (m, 2H), 7.39 – 7.29 (m, 1H), 7.27 – 7.19 (m, 1H), 7.04 – 6.86 (m, 2H), 6.86 – 6.69 (m, 1H), 5.04 – 4.78 (m, 1H), 3.36 – 2.96 (m, 2H). <sup>13</sup>C{<sup>1</sup>H} NMR (100 MHz, CDCl<sub>3</sub>)  $\delta$  166.7, 163.2 (d,  $J = 245.8$  Hz), 149.8, 143.0 (d,  $J = 6.7$  Hz), 131.08, 130.87, 130.8 (d,  $J = 2.5$  Hz), 130.23, 128.82, 127.59, 125.36, 122.79, 122.6 (d,  $J = 2.9$  Hz), 117.53, 116.84, 114.6 (d,  $J = 21.0$  Hz), 114.1 (d,  $J = 21.9$  Hz), 37.27, 37.24. <sup>19</sup>F{<sup>1</sup>H} NMR (376 MHz, CDCl<sub>3</sub>)  $\delta$  -111.67. IR (film):  $\nu$  (cm<sup>-1</sup>) 1773, 1589, 1486, 1444, 1252, 1217, 1158, 1123, 977, 907, 816, 784, 749. HRMS (FTMS+c ESI) calcd for [C<sub>19</sub>H<sub>13</sub>FO<sub>2</sub>+Na<sup>+</sup>]: 315.0792, found 315.0794.

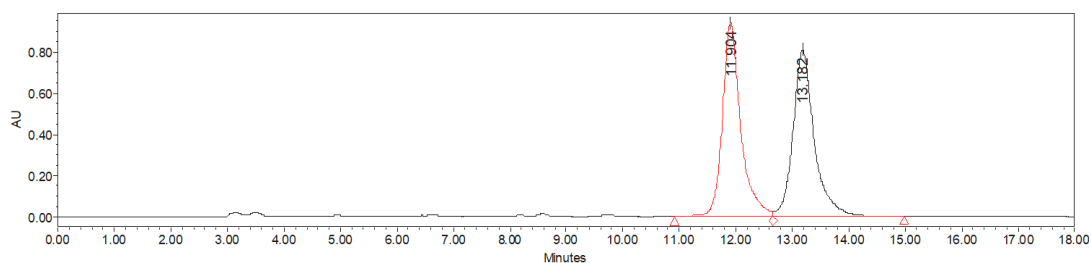

|   | Retention Time | Area     | % Area |
|---|----------------|----------|--------|
| 1 | 11.904         | 21165962 | 50.02  |
| 2 | 13.182         | 21151842 | 49.98  |

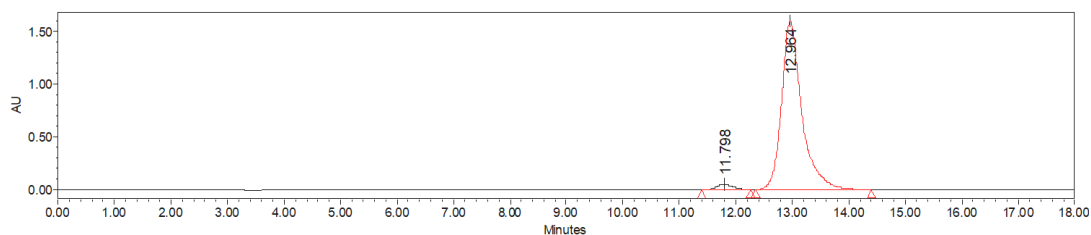

|   | Retention Time | Area     | % Area |
|---|----------------|----------|--------|
| 1 | 11.798         | 958880   | 2.36   |
| 2 | 12.964         | 39629076 | 97.64  |

**(R)-3-(2-hydroxynaphthalen-1-yl)-3-phenyl-1-(piperidin-1-yl)propan-1-one (4u)**

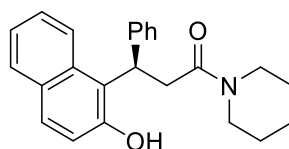

White solid, Mp: 161–164 °C, 26.4 mg, 99% yield, 95% ee;  $[\alpha]^{19} = +673.0$  ( $c = 0.23$  in  $\text{CH}_2\text{Cl}_2$ ,  $\lambda = 436$  nm); HPLC (Daicel chiralcel IA, *n*-hexane/*i*-PrOH 80/20, 1.0 mL/min, 230 nm)  $t_{R(\text{minor})} = 6.85$  min,  $t_{R(\text{major})} = 7.79$  min;  $^1\text{H}$  NMR (400 MHz,  $\text{CDCl}_3$ )  $\delta$  9.30 (s, 1H), 7.76 – 7.62 (m, 2H), 7.61 – 7.46 (m, 1H), 7.31 – 7.09 (m, 8H), 5.57 (dd,  $J = 9.9, 3.7$  Hz, 1H), 3.66 – 3.37 (m, 5H), 3.36 – 3.27 (m, 1H), 1.65 – 1.24 (m, 5H), 1.21 – 1.09 (m, 1H).  $^{13}\text{C}\{^1\text{H}\}$  NMR (100 MHz,  $\text{CDCl}_3$ )  $\delta$  171.2, 153.7, 143.3, 132.0, 130.3, 129.1, 128.9, 128.3, 127.0, 125.7, 125.4, 124.0, 122.5, 122.4, 121.0, 46.8, 43.4, 36.6, 34.9, 26.0, 25.4, 24.2. IR (film):  $\nu$  ( $\text{cm}^{-1}$ ) 3058, 2937, 1602, 1511, 1472, 1439, 1267, 1017, 816, 746, 700. HRMS (FTMS+c ESI) calcd for  $[\text{C}_{24}\text{H}_{25}\text{NO}_2 + \text{Na}^+]$ : 382.1778, found 382.1769.

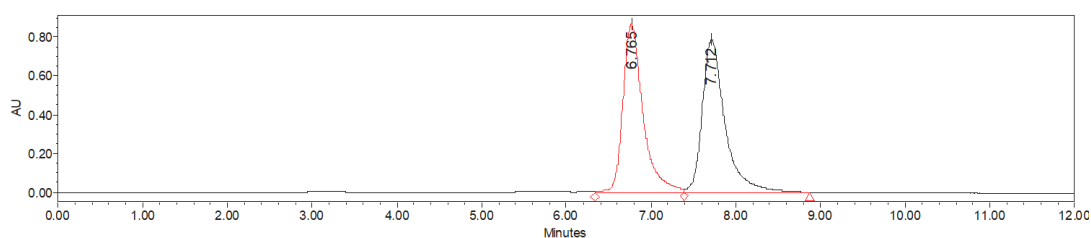

|   | Retention Time | Area     | % Area |
|---|----------------|----------|--------|
| 1 | 6.765          | 14335298 | 49.58  |
| 2 | 7.712          | 14579775 | 50.42  |

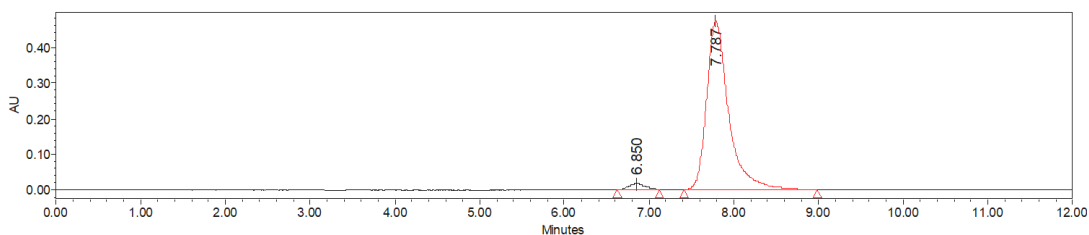

|   | Retention Time | Area    | % Area |
|---|----------------|---------|--------|
| 1 | 6.850          | 212540  | 2.44   |
| 2 | 7.787          | 8481699 | 97.56  |

**(R)-3-(3-fluorophenyl)-3-(2-hydroxynaphthalen-1-yl)-1-(piperidin-1-yl)propan-1-one (4v)**

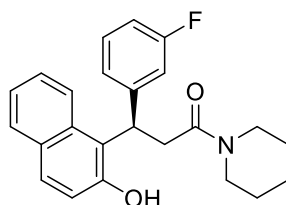

White solid, Mp: 162–166 °C, 22.4 mg, 94% yield, 95% ee;  $[\alpha]^{19} = +671.9$  ( $c = 0.16$  in  $\text{CH}_2\text{Cl}_2$ ,  $\lambda = 436$  nm); HPLC (Daicel chiralcel IA, *n*-hexane/*i*-PrOH 95/5, 1.0 mL/min, 230 nm)  $t_{R(\text{minor})} = 24.82$  min,  $t_{R(\text{major})} = 28.25$  min;  $^1\text{H}$  NMR (400 MHz,  $\text{CDCl}_3$ )  $\delta$  9.33 (s, 1H), 7.82 – 7.59 (m, 2H), 7.56 – 7.39 (m, 1H), 7.30 – 7.11 (m, 4H), 7.00 – 6.87 (m, 2H), 6.87 – 6.75 (m, 2H), 5.54 (dd,  $J = 10.2, 2.3$  Hz, 1H), 3.72 – 3.09 (m, 6H), 1.69 – 1.37 (m, 4H), 1.37 – 1.27 (m, 1H), 1.23 – 1.11 (m, 1H).  $^{13}\text{C}\{^1\text{H}\}$  NMR (100 MHz,  $\text{CDCl}_3$ )  $\delta$  170.8, 162.9 (d,  $J = 243.5$  Hz), 153.7, 146.2 (d,  $J = 6.7$  Hz), 131.9, 130.4, 129.6 (d,  $J = 8.3$  Hz), 129.3, 129.0, 125.6, 123.8, 122.7 (d,  $J = 2.6$  Hz), 122.6, 121.8, 121.0, 114.0 (d,  $J = 22.1$  Hz), 112.6 (d,  $J = 21.0$  Hz), 46.8, 43.5, 36.5, 35.0, 26.1, 25.4, 24.2.  $^{19}\text{F}\{^1\text{H}\}$  NMR (376 MHz,  $\text{CDCl}_3$ )  $\delta$  –113.22. IR (film):  $\nu(\text{cm}^{-1})$  3062, 2938, 1608, 1512, 1480, 1439, 1267, 1016, 818, 742, 697. HRMS (FTMS+c ESI) calcd for  $[\text{C}_{24}\text{H}_{24}\text{FNO}_2 + \text{Na}^+]$ : 400.1683, found 400.1678.

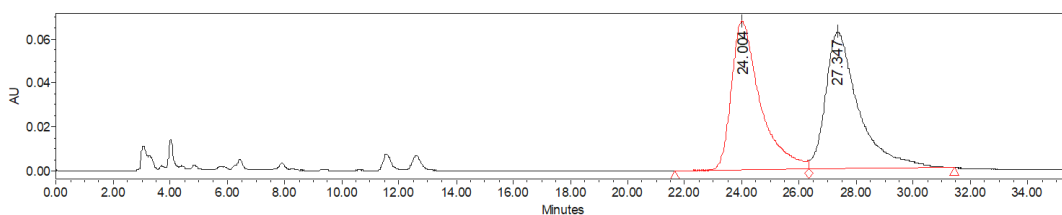

|   | Retention Time | Area    | % Area |
|---|----------------|---------|--------|
| 1 | 24.004         | 4747008 | 48.72  |
| 2 | 27.347         | 4995825 | 51.28  |

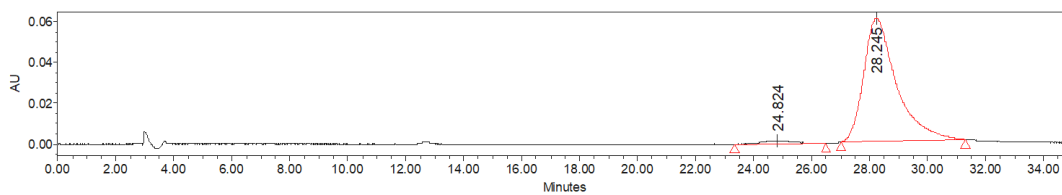

|   | Retention Time | Area    | % Area |
|---|----------------|---------|--------|
| 1 | 24.824         | 108811  | 2.24   |
| 2 | 28.245         | 4744373 | 97.76  |

**(R)-tolterodine**

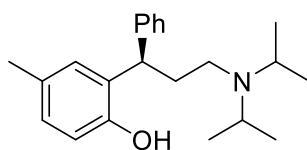

Colorless oil, 35.1 mg, 72% yield;  $[\alpha]_D^{21} = +30.2$  ( $c = 0.38$  in  $\text{CH}_3\text{OH}$ ,  $\lambda = 589$  nm);  $^1\text{H NMR}$  (400 MHz,  $\text{CDCl}_3$ )  $\delta$  7.42 – 7.27 (m, 4H), 7.25 – 7.17 (m, 1H), 6.90 – 6.75 (m, 2H), 6.63 – 6.46 (m, 1H), 4.62 – 4.40 (m, 1H), 3.36 – 3.08 (m, 2H), 2.79 – 2.67 (m, 1H), 2.45 – 2.27 (m, 2H), 2.16 – 1.98 (m, 4H), 1.14 (d,  $J = 6.7$  Hz, 6H), 1.08 (d,  $J = 6.7$  Hz, 6H).  $^{13}\text{C}\{^1\text{H}\}$  NMR (100 MHz,  $\text{CDCl}_3$ )  $\delta$  153.2, 144.8, 132.4, 129.3, 128.6, 128.5, 128.3, 127.7, 126.1, 118.2, 47.8, 42.0, 39.3, 33.2, 20.7, 20.0, 19.5. IR (film):  $\nu$  ( $\text{cm}^{-1}$ ) 2967, 1603, 1492, 1456, 1388, 1255, 1161, 1112, 1033, 815, 755, 701. HRMS (FTMS+c ESI) calcd for  $[\text{C}_{22}\text{H}_{31}\text{NO} + \text{Na}^+]$ : 348.2298, found 348.2290.

## 11. Copies of NMR spectra for the substrates and the products

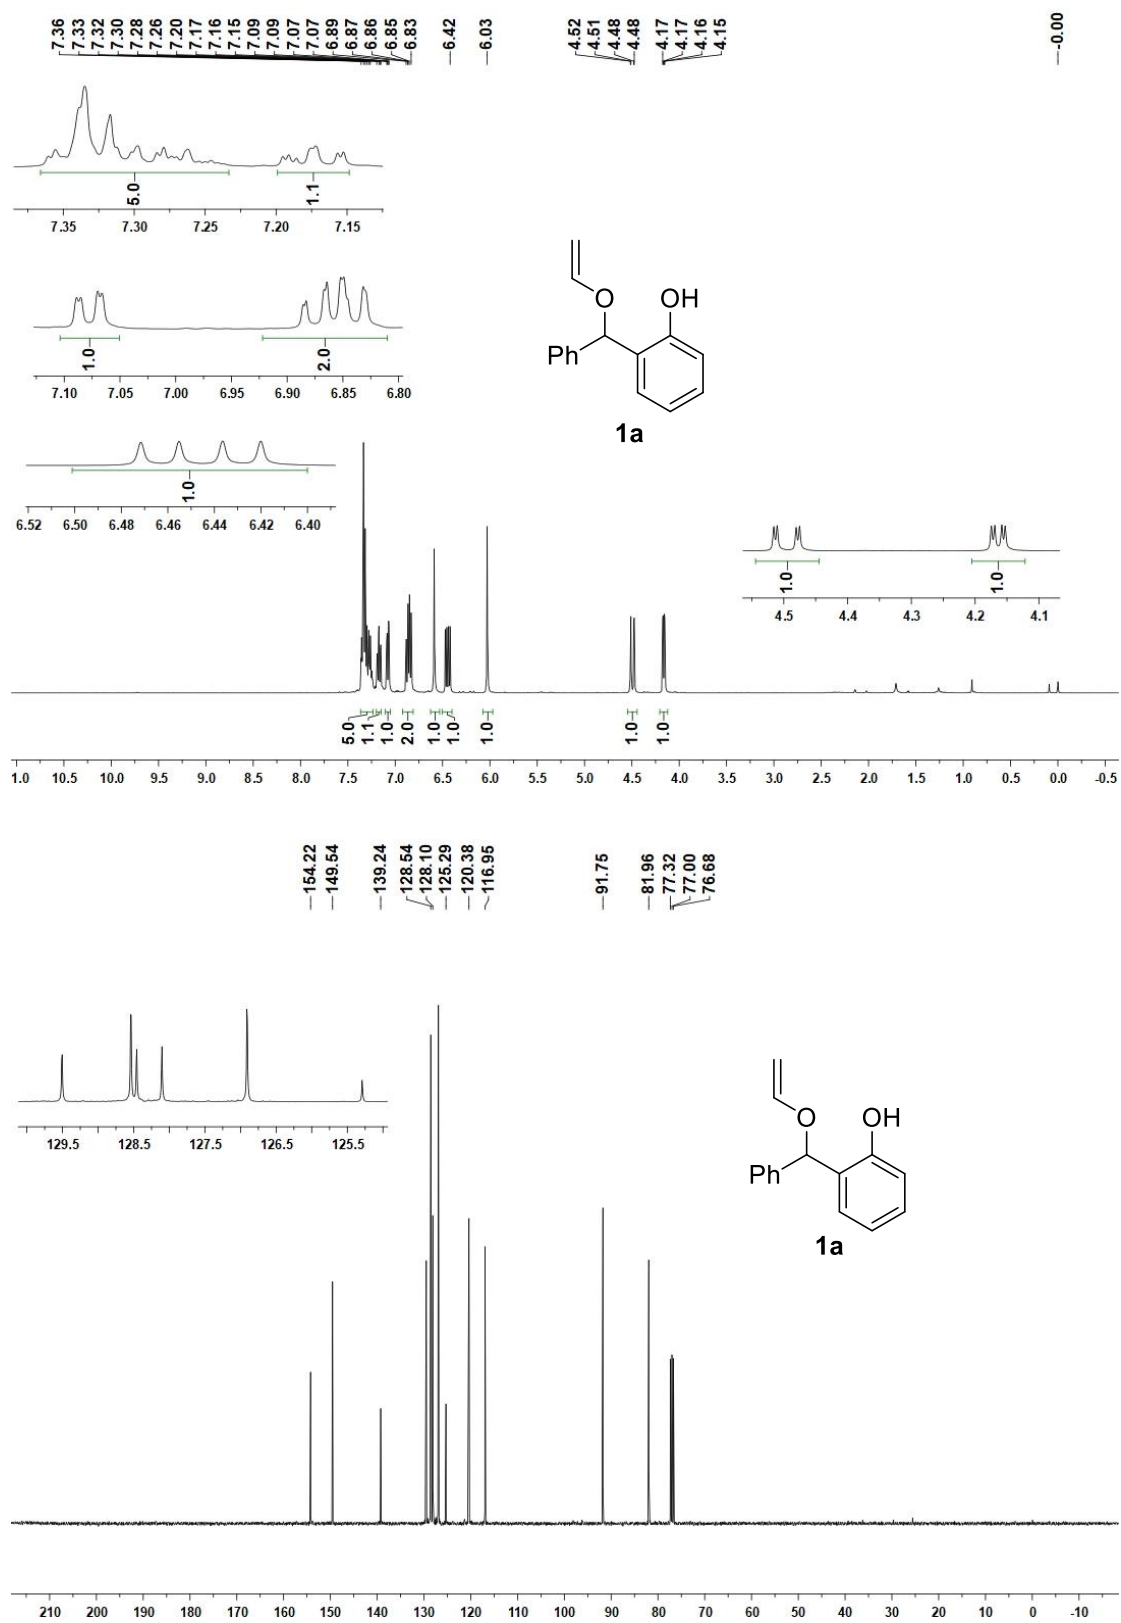

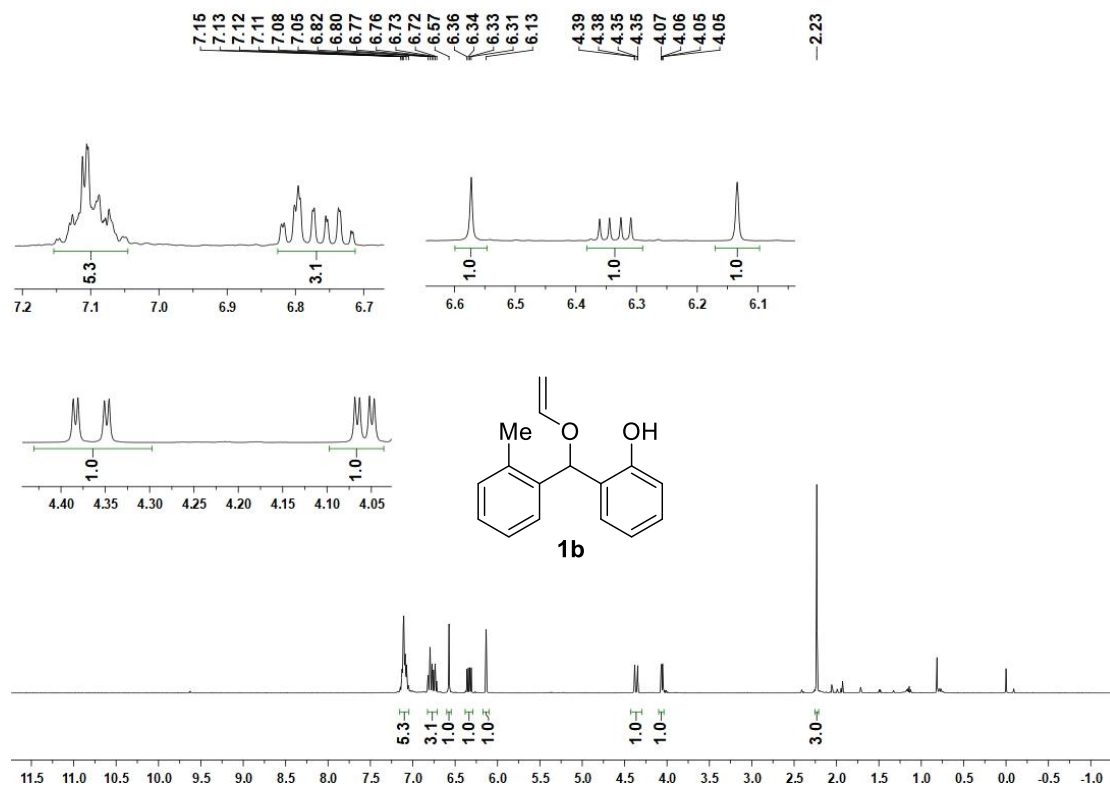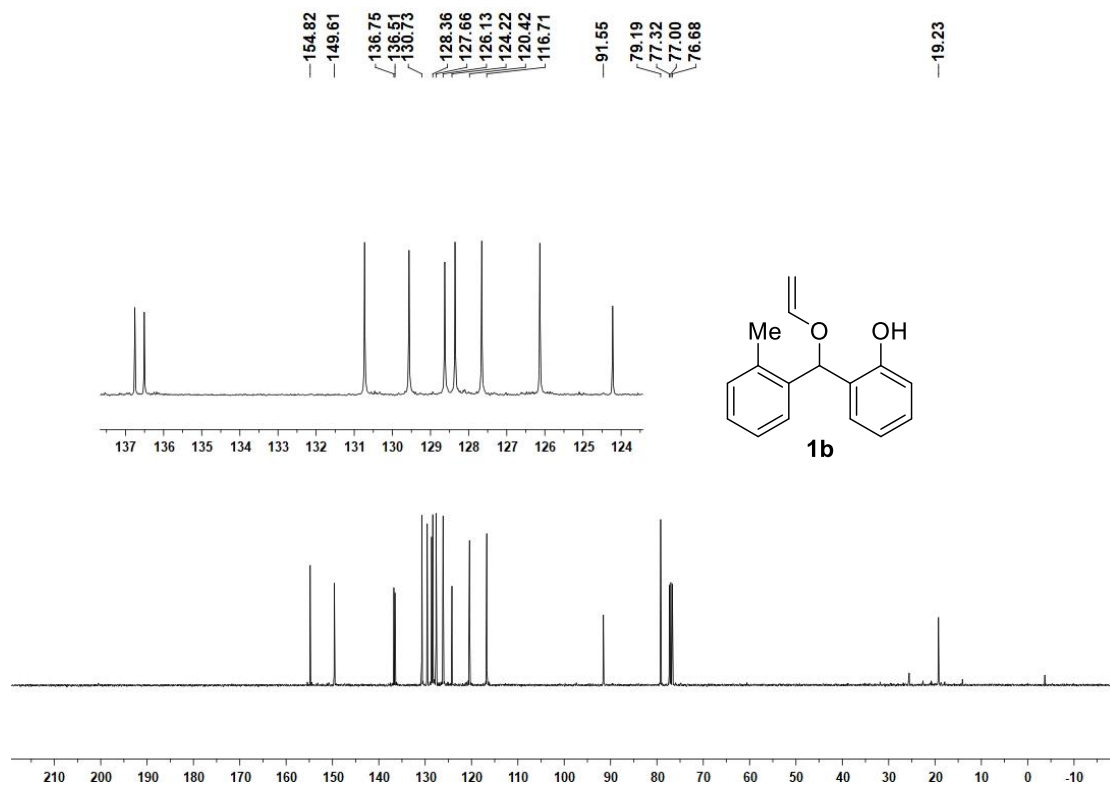

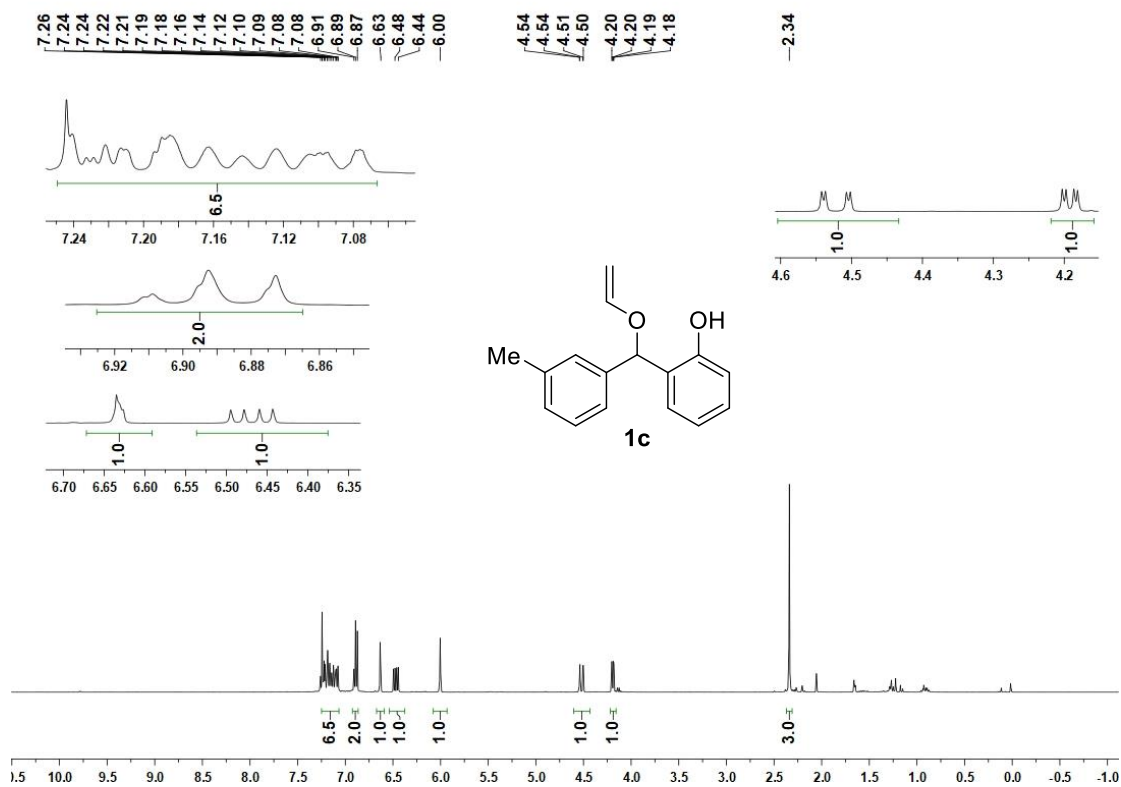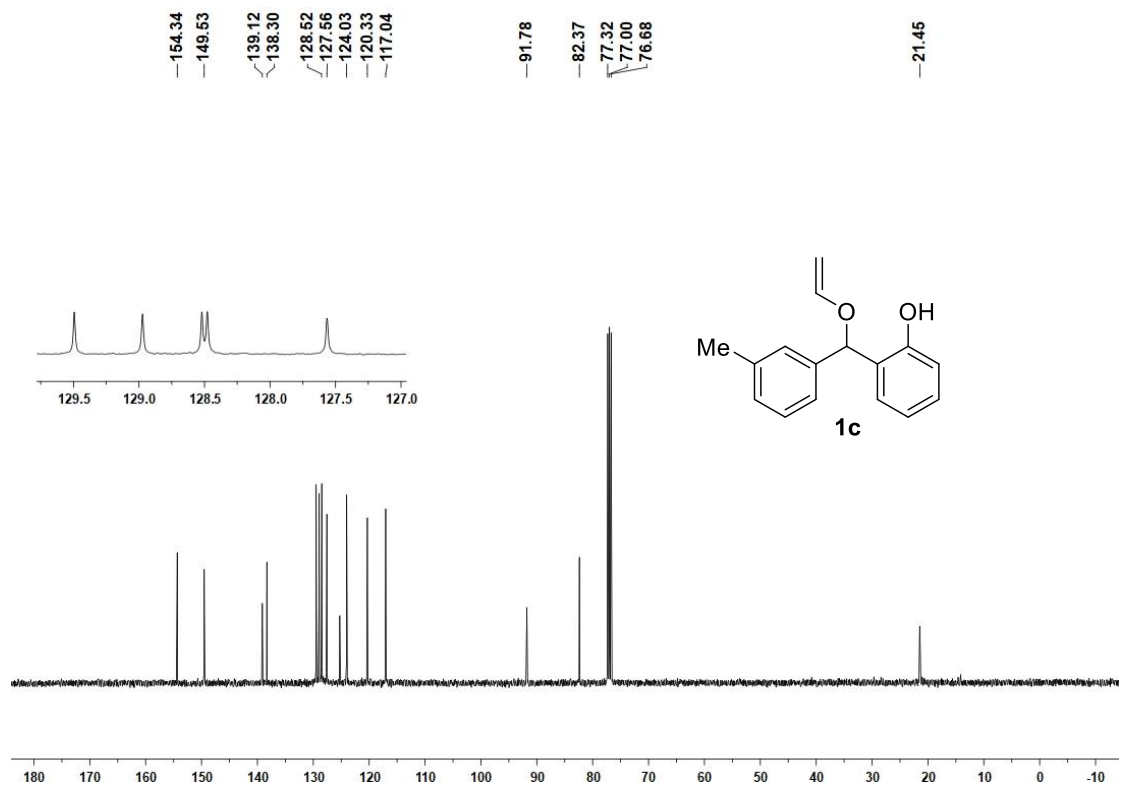

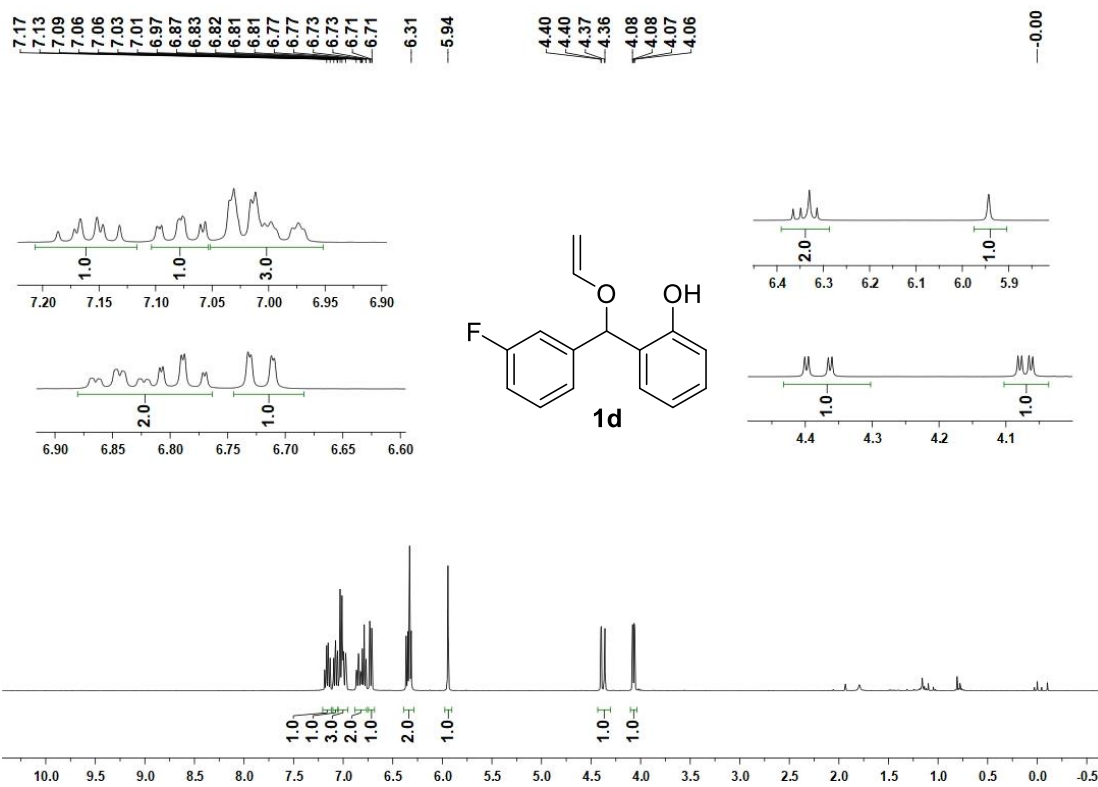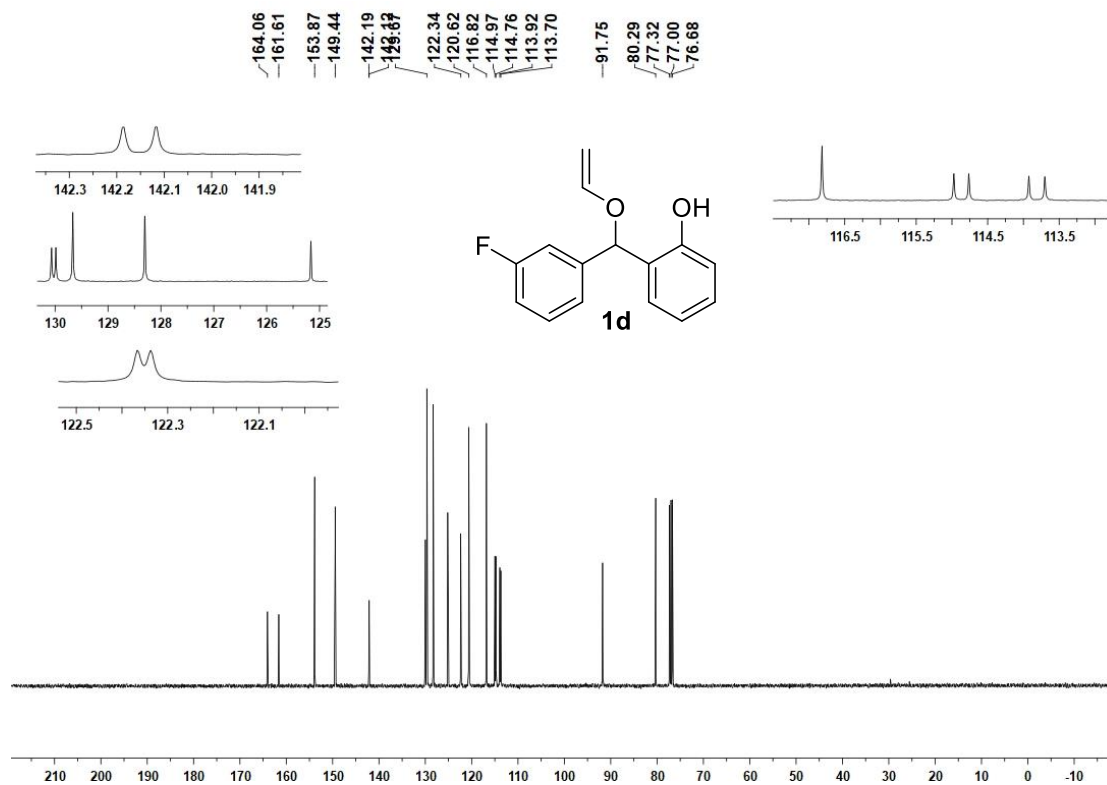



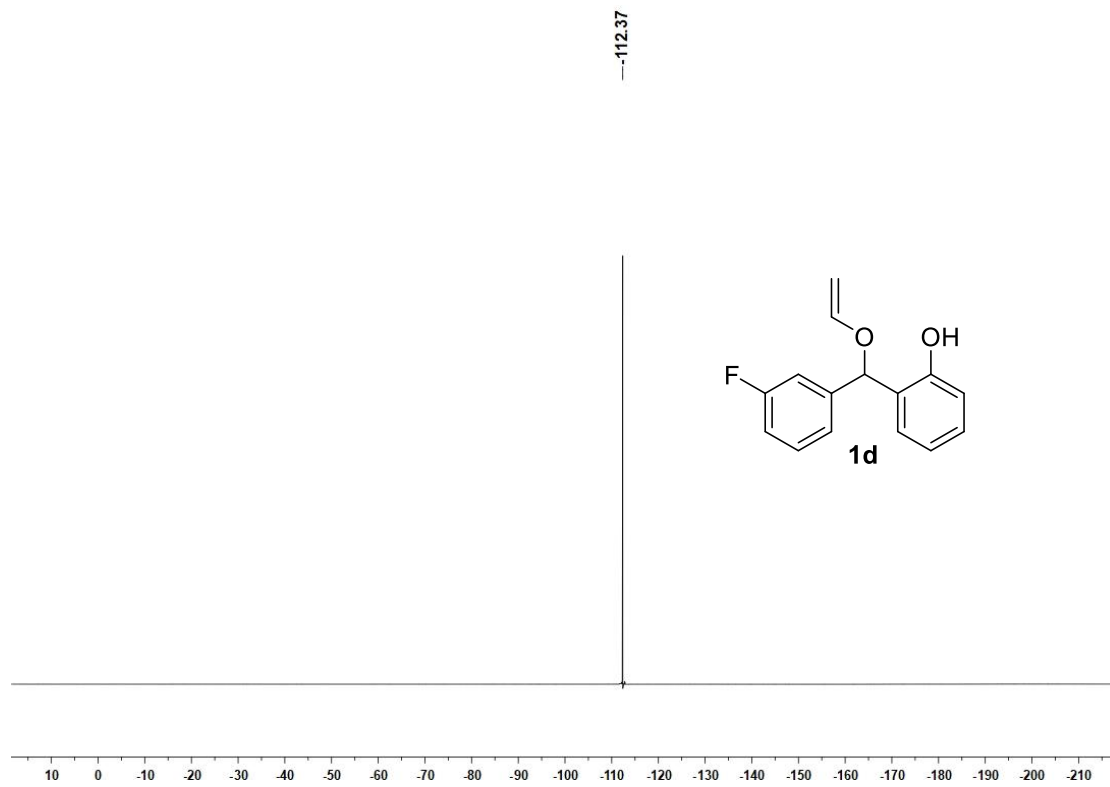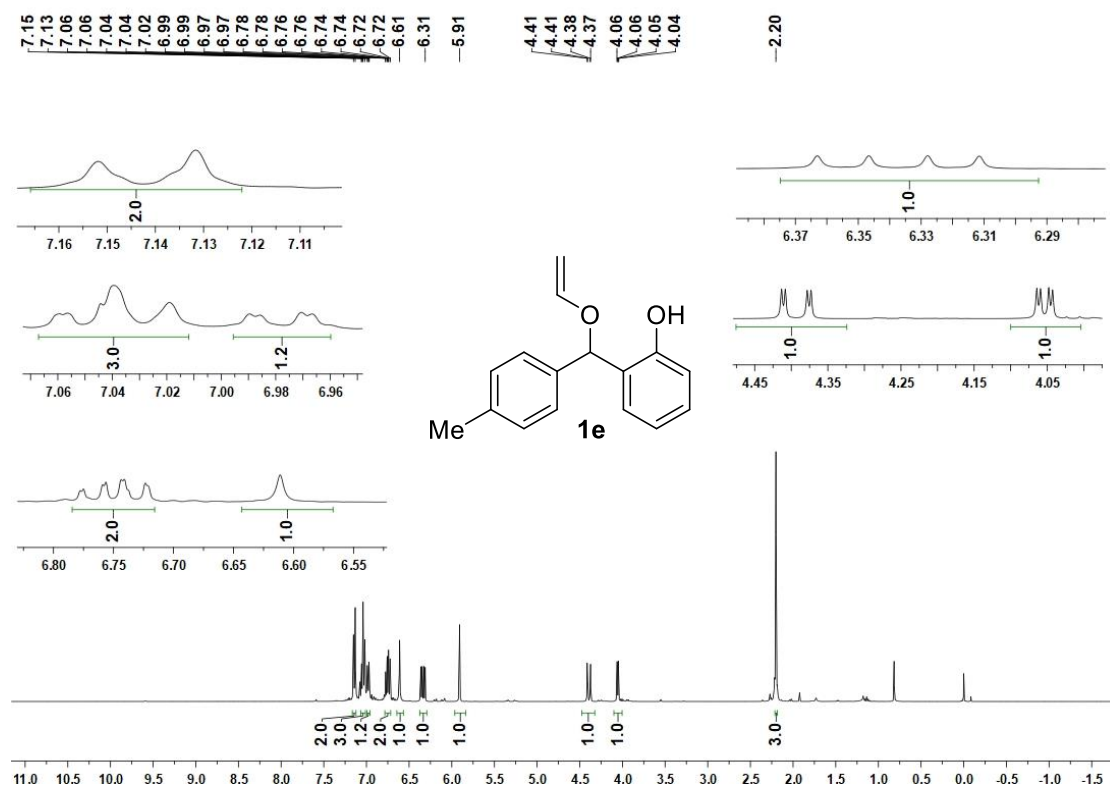

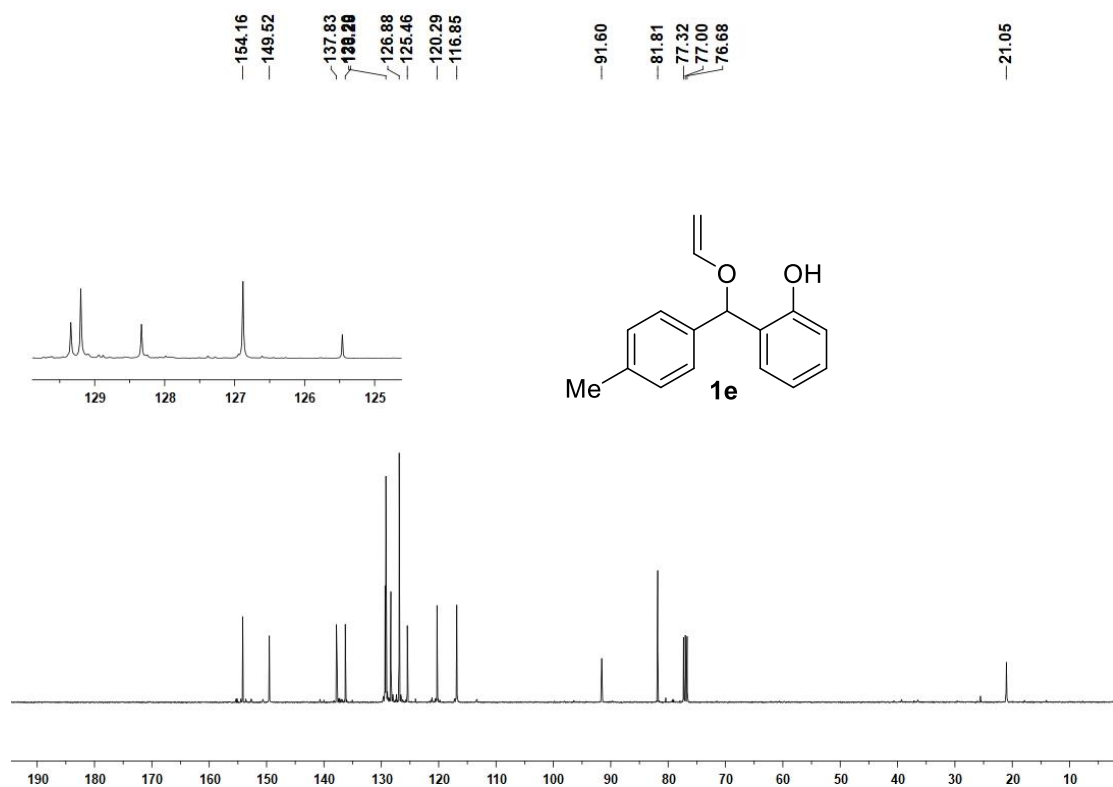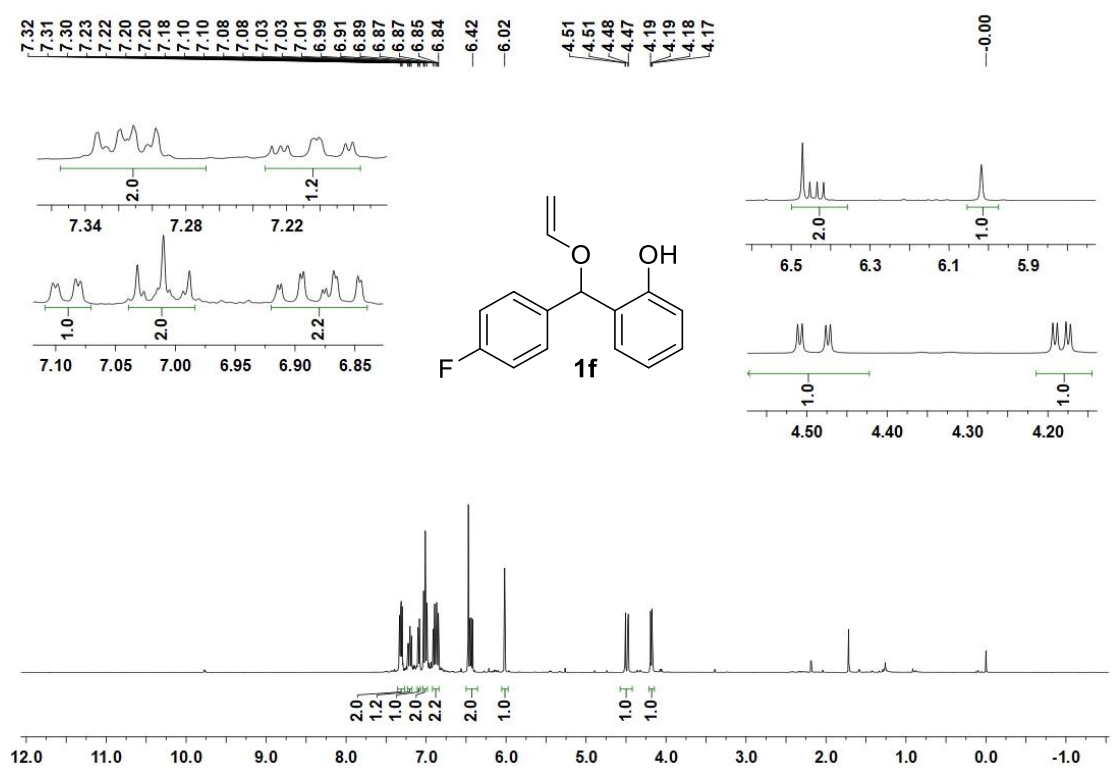

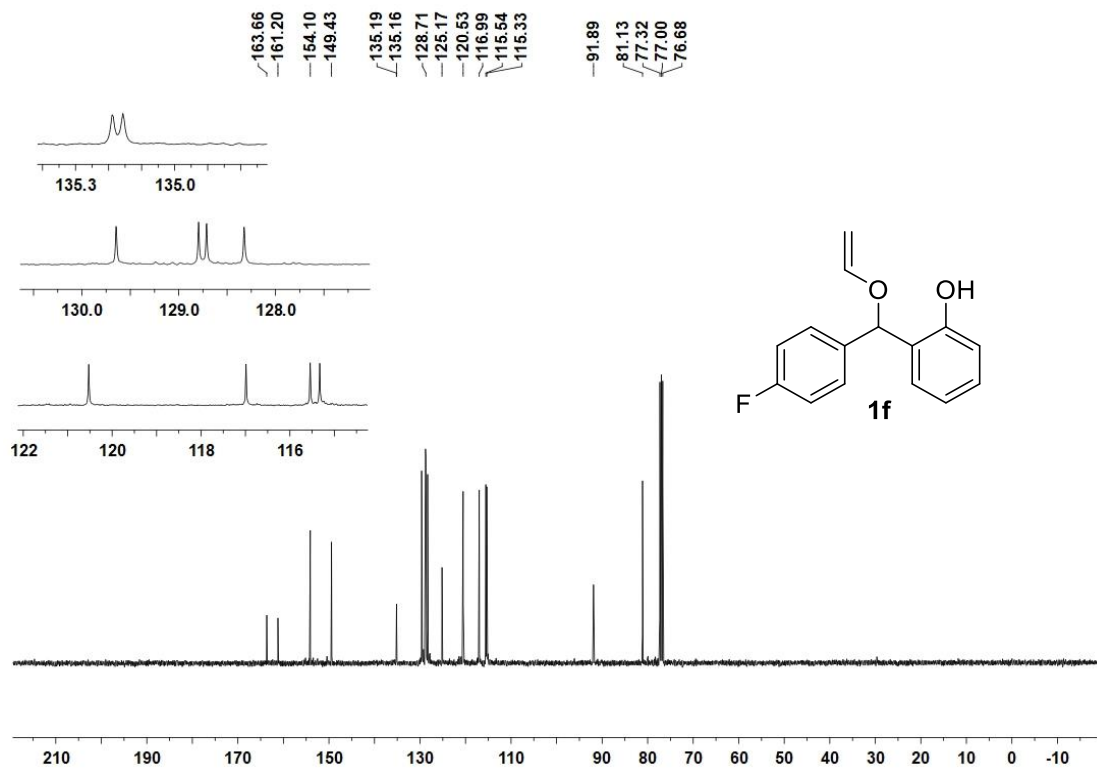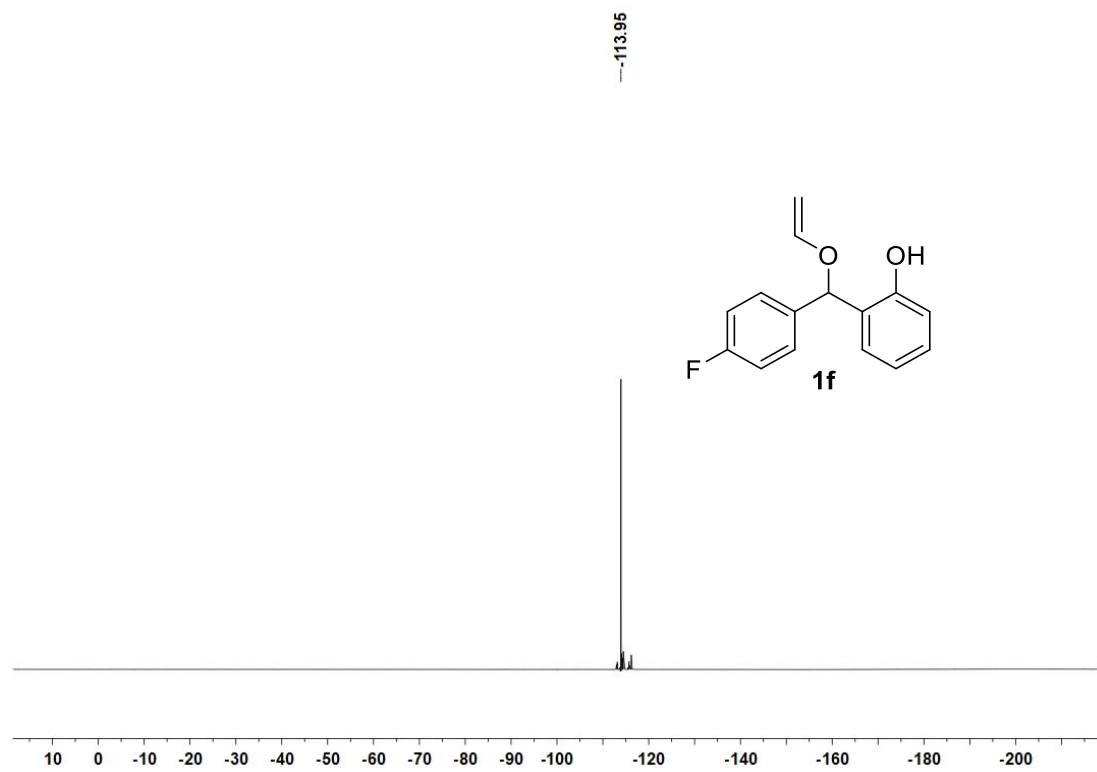

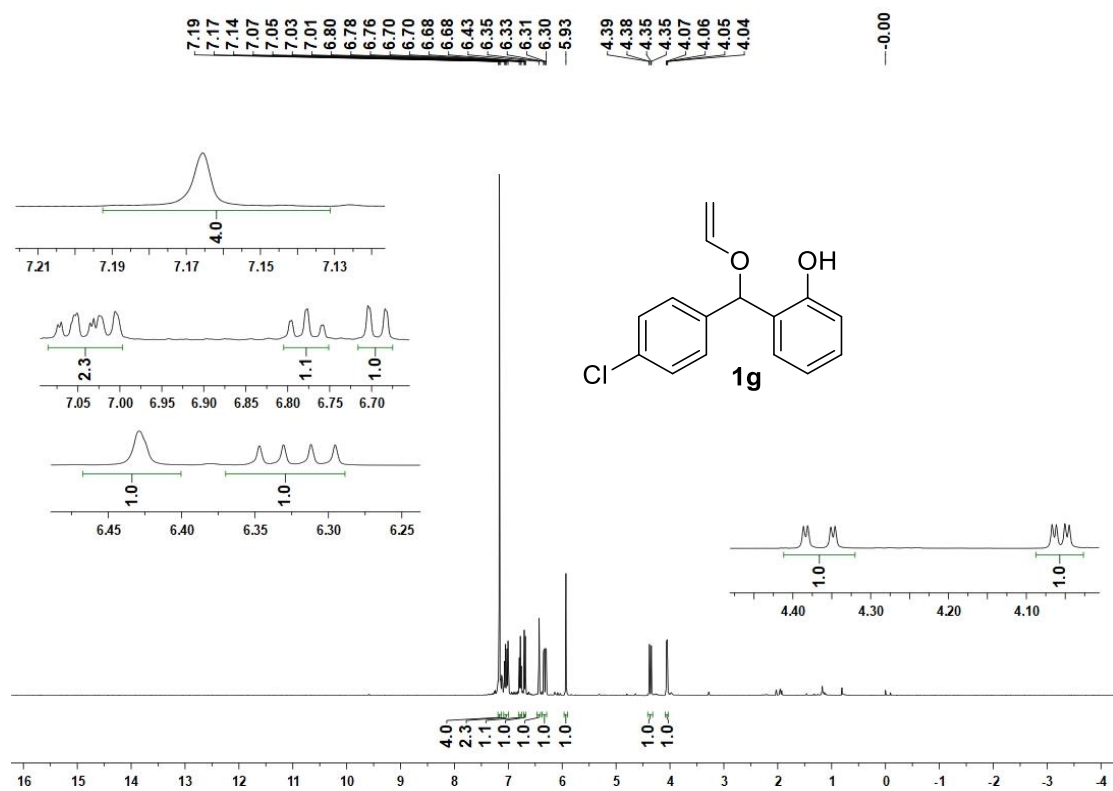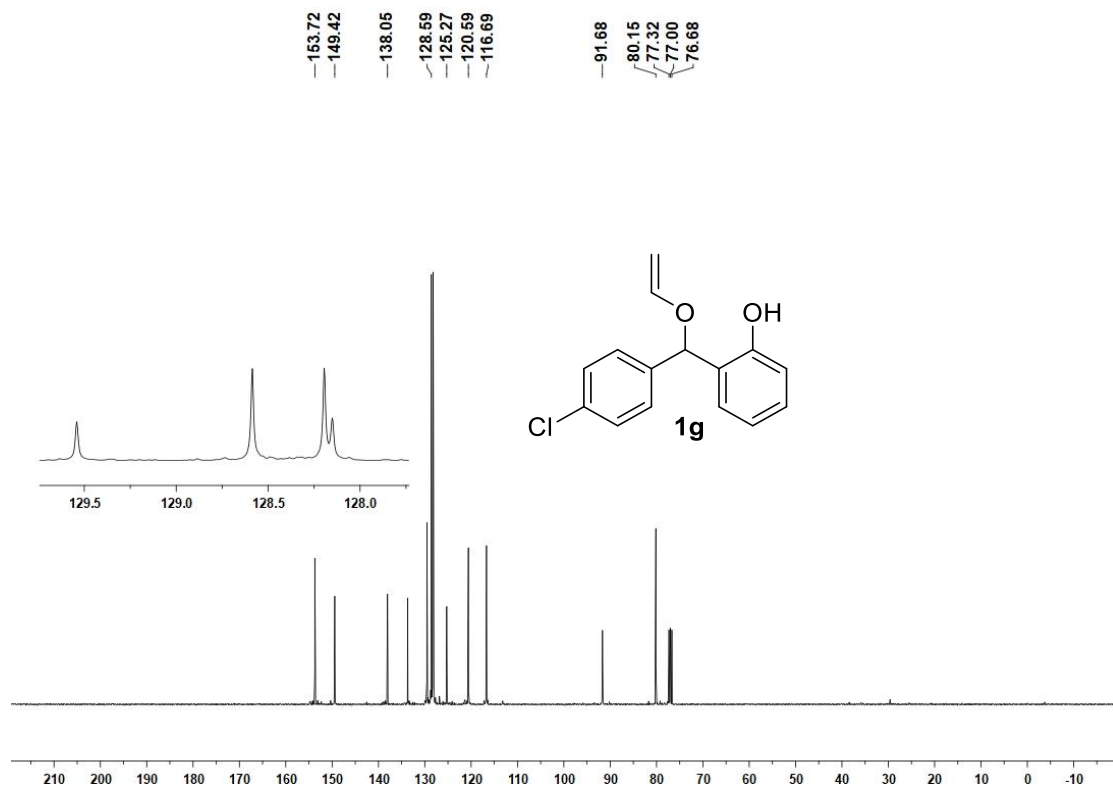

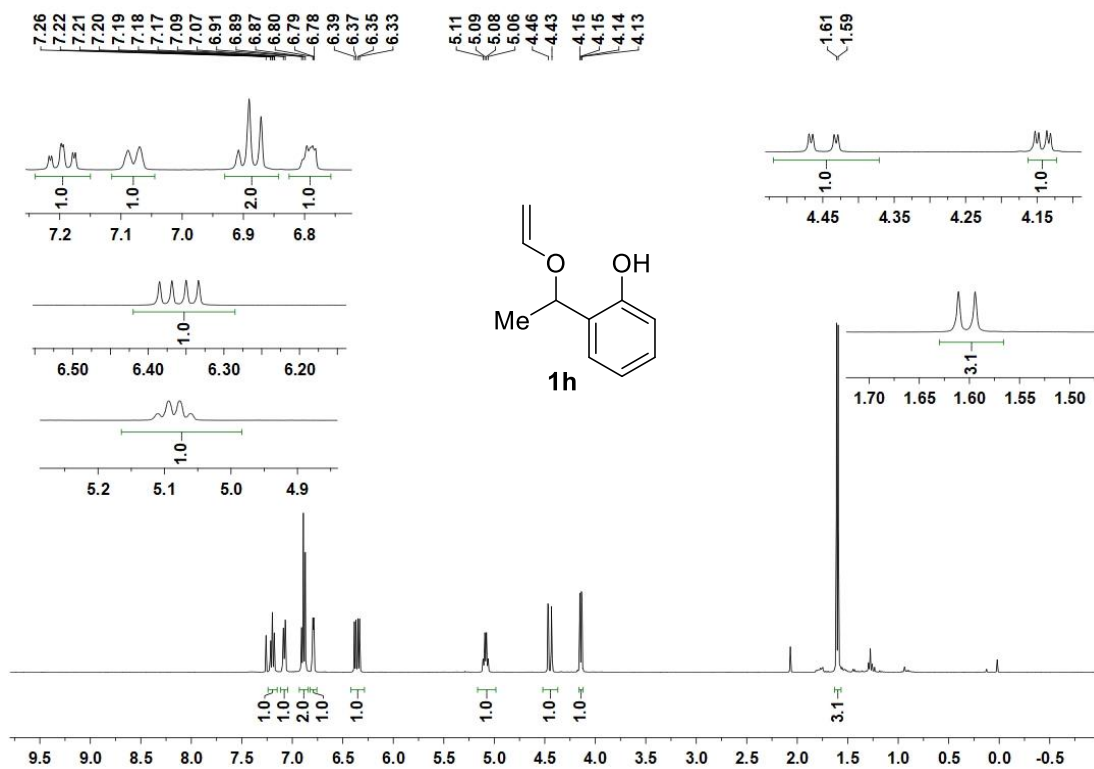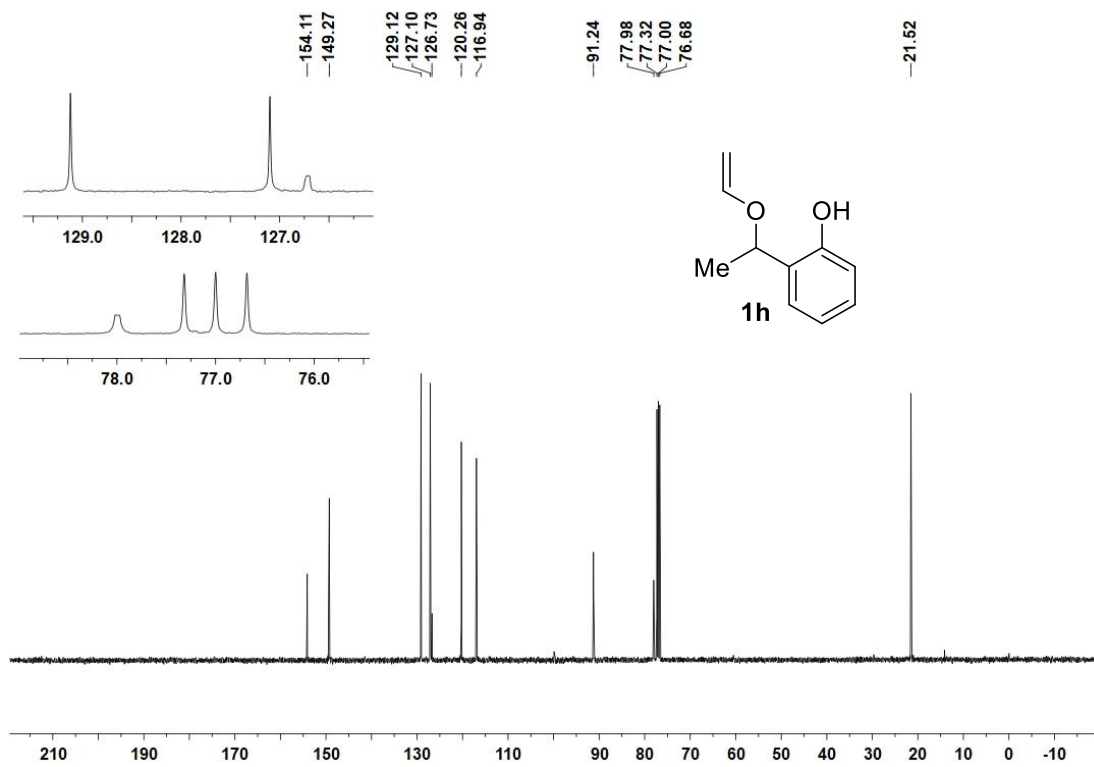

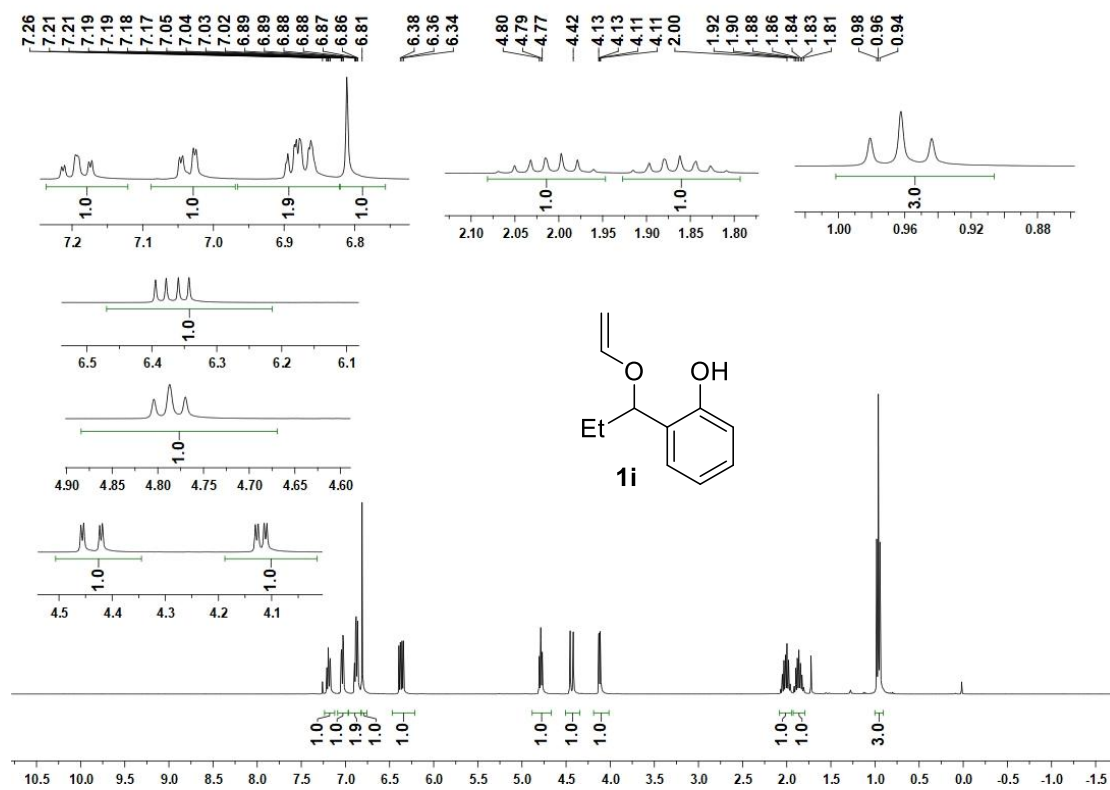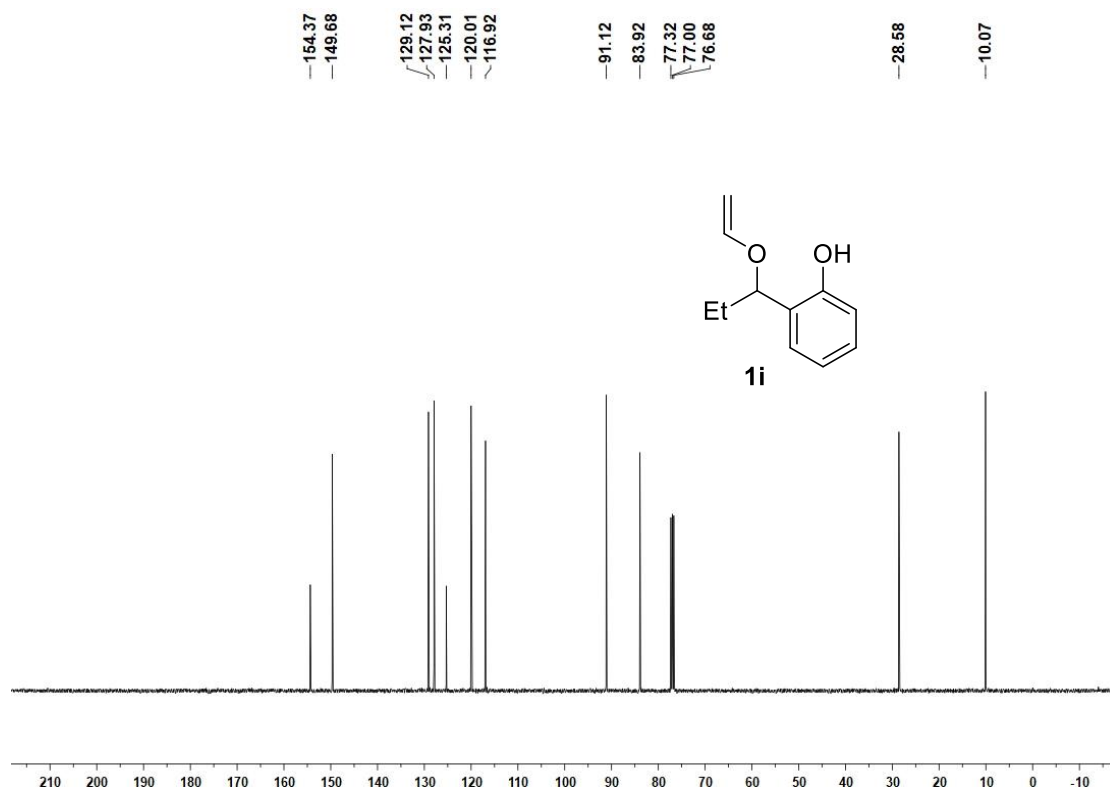

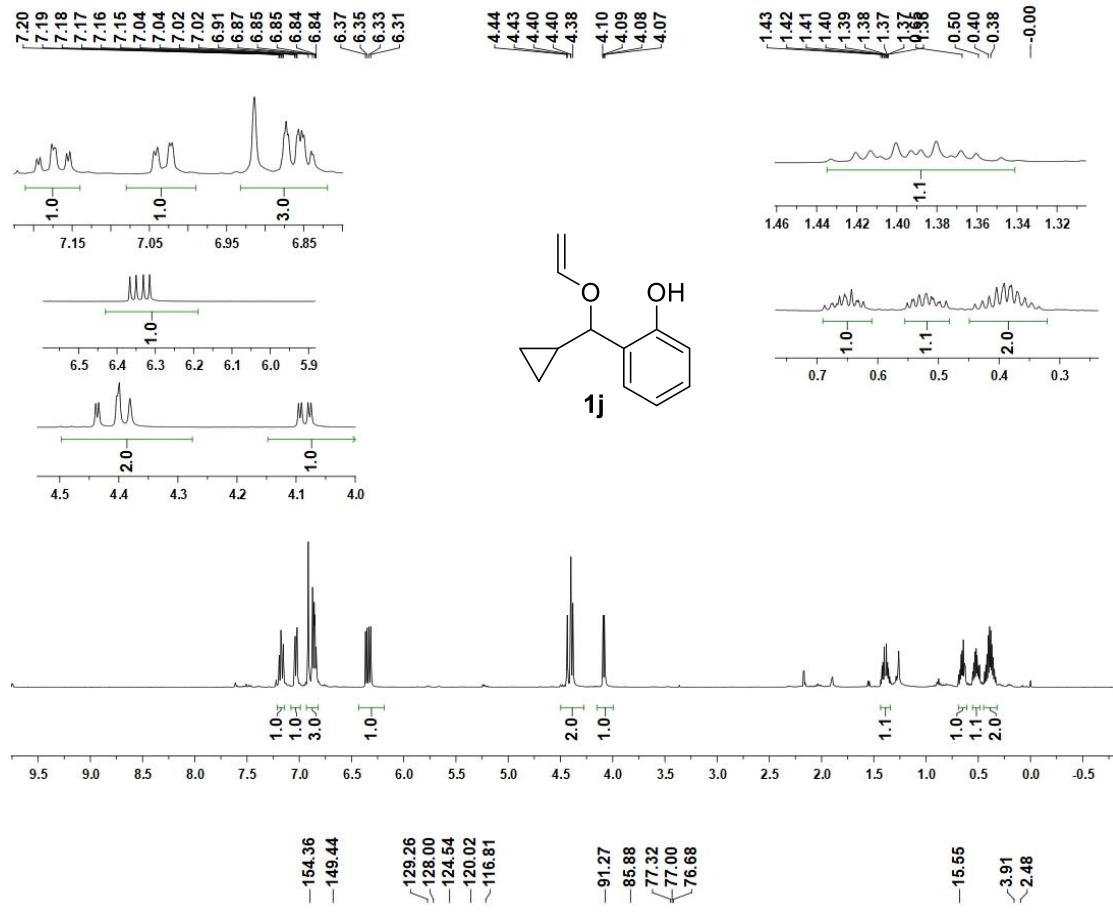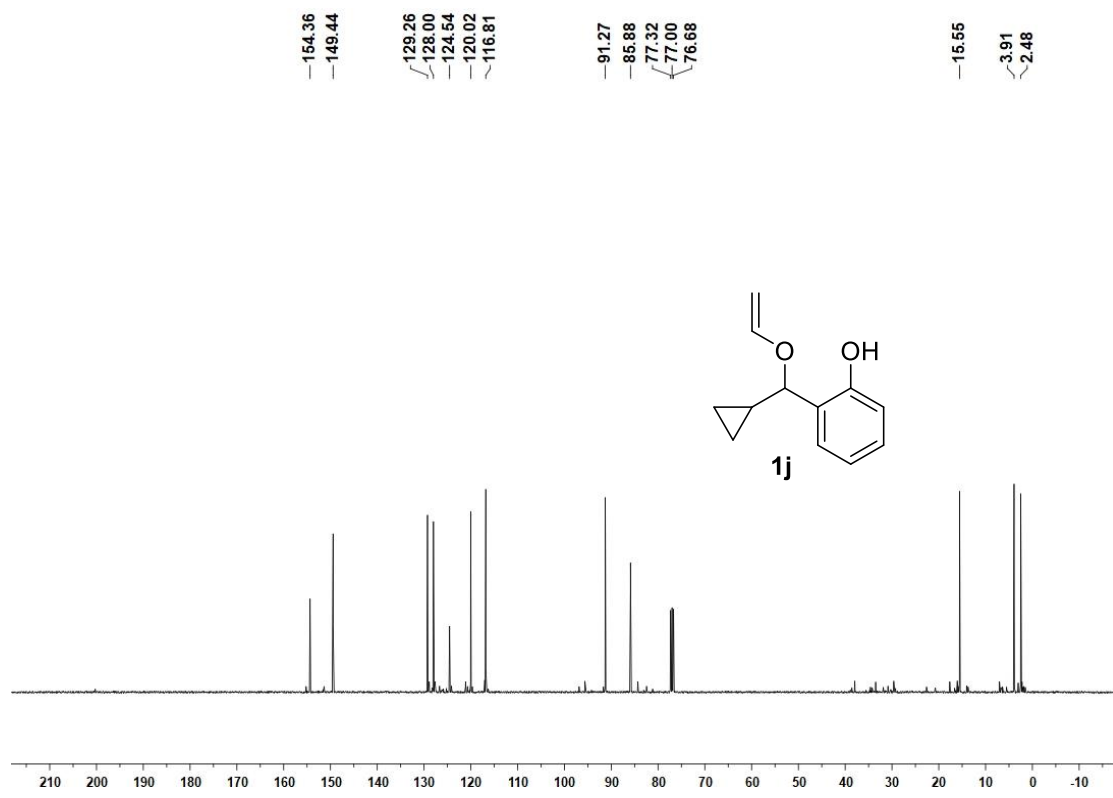

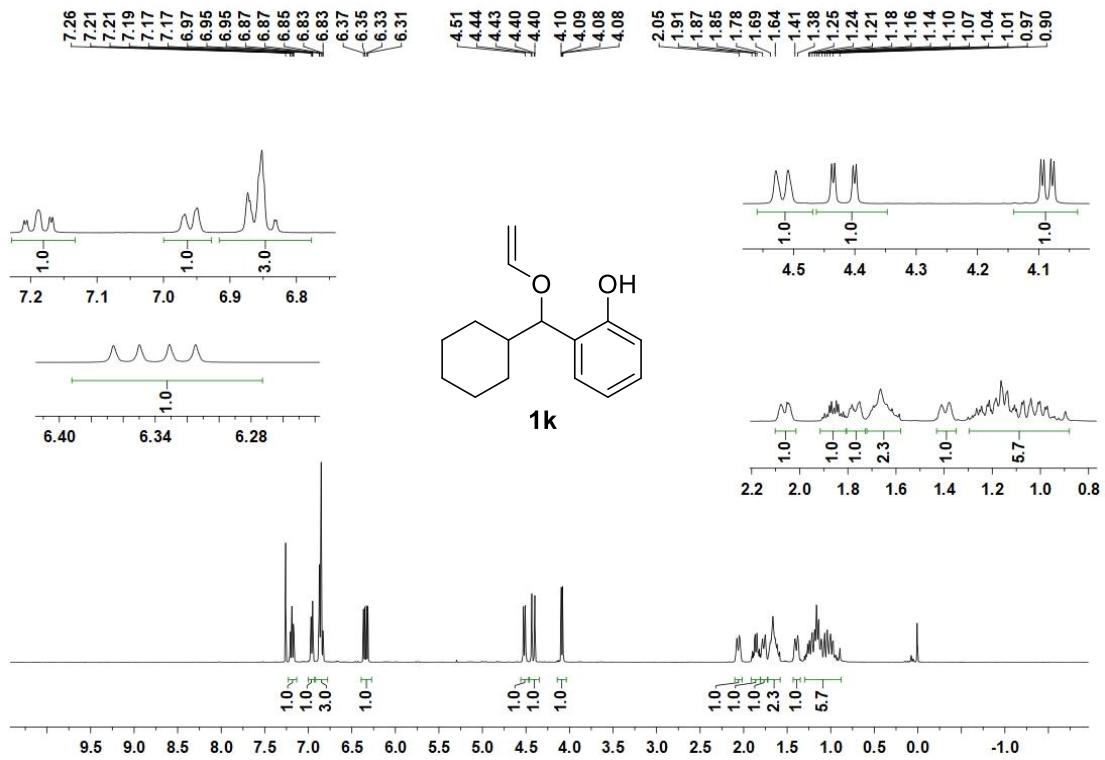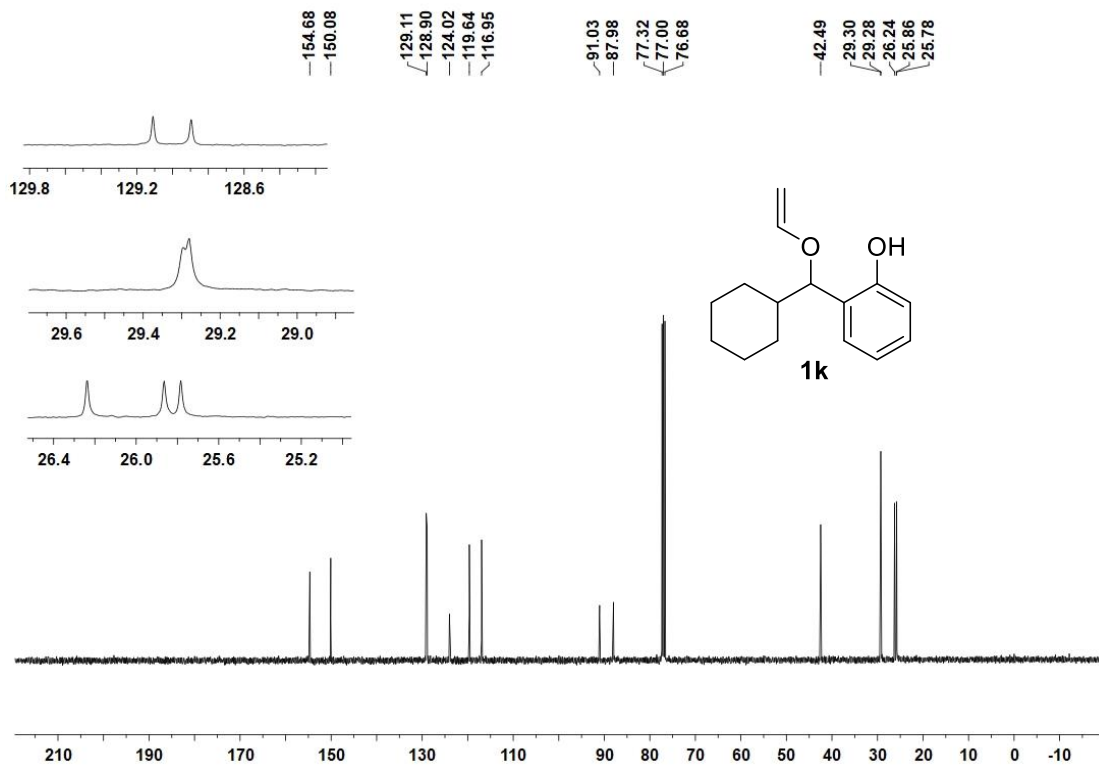



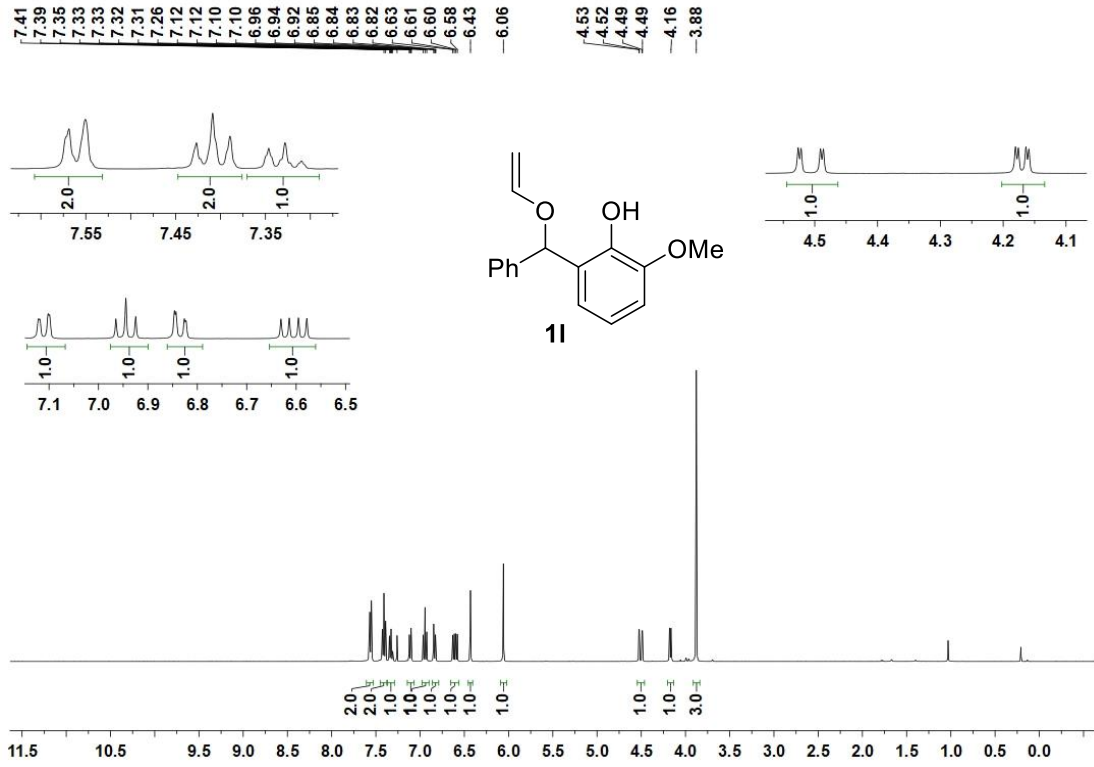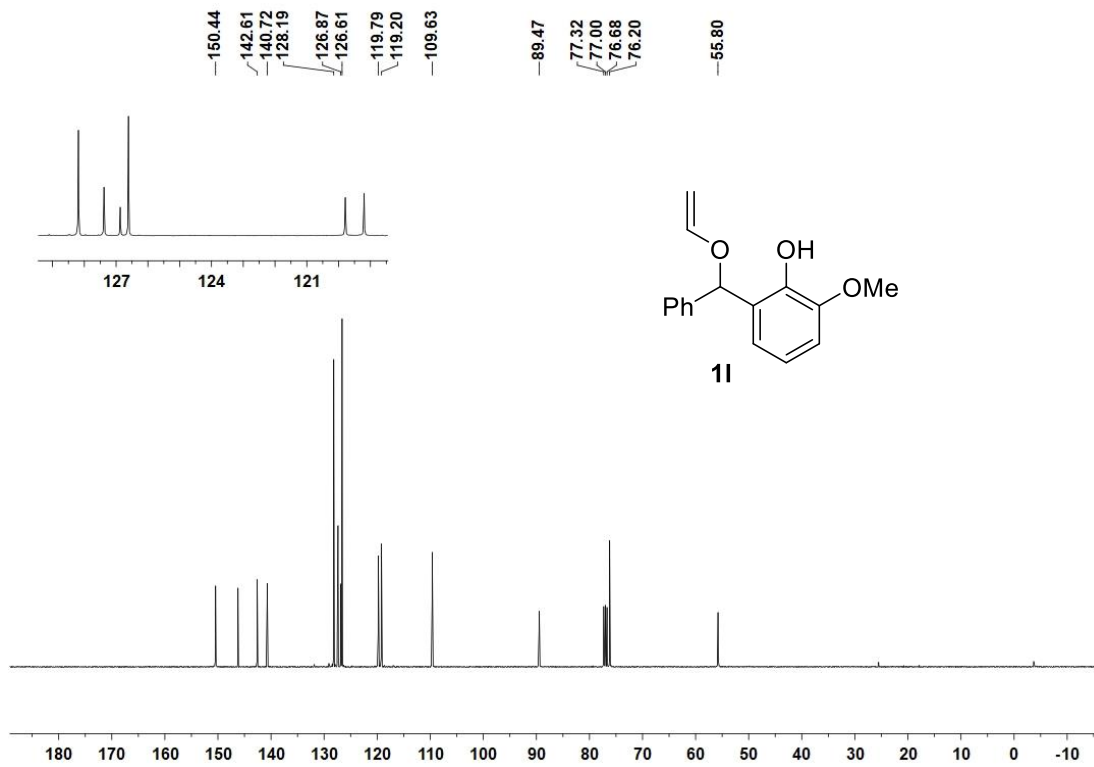

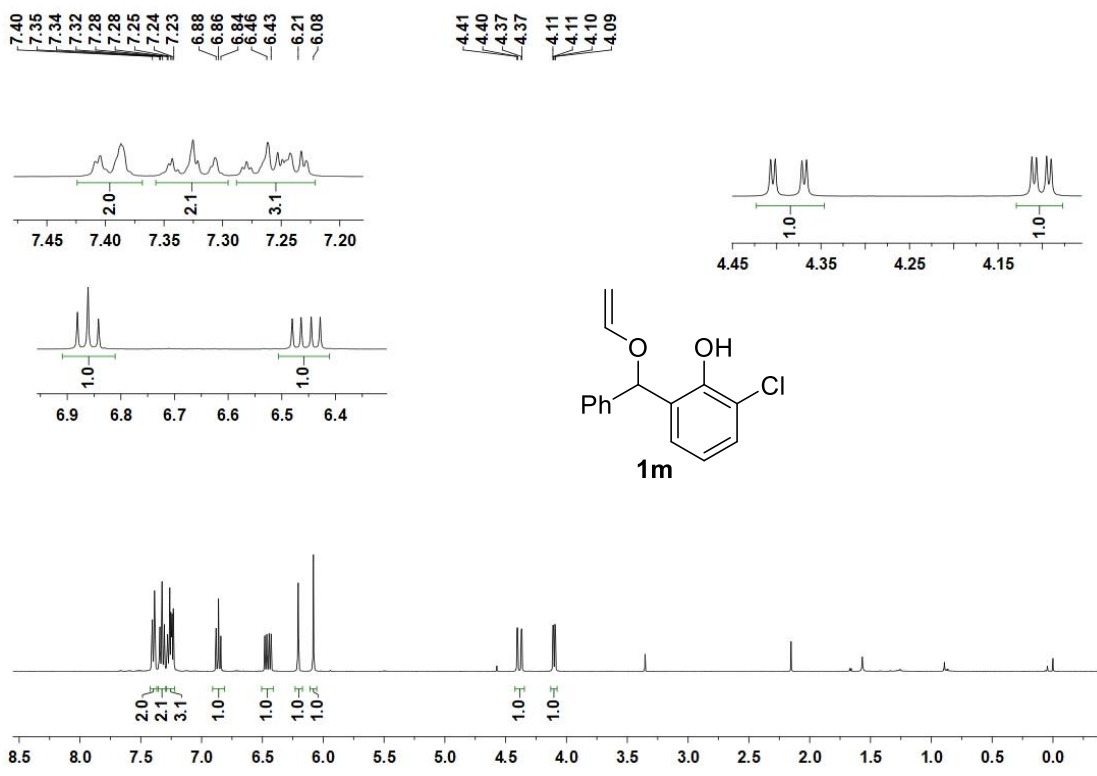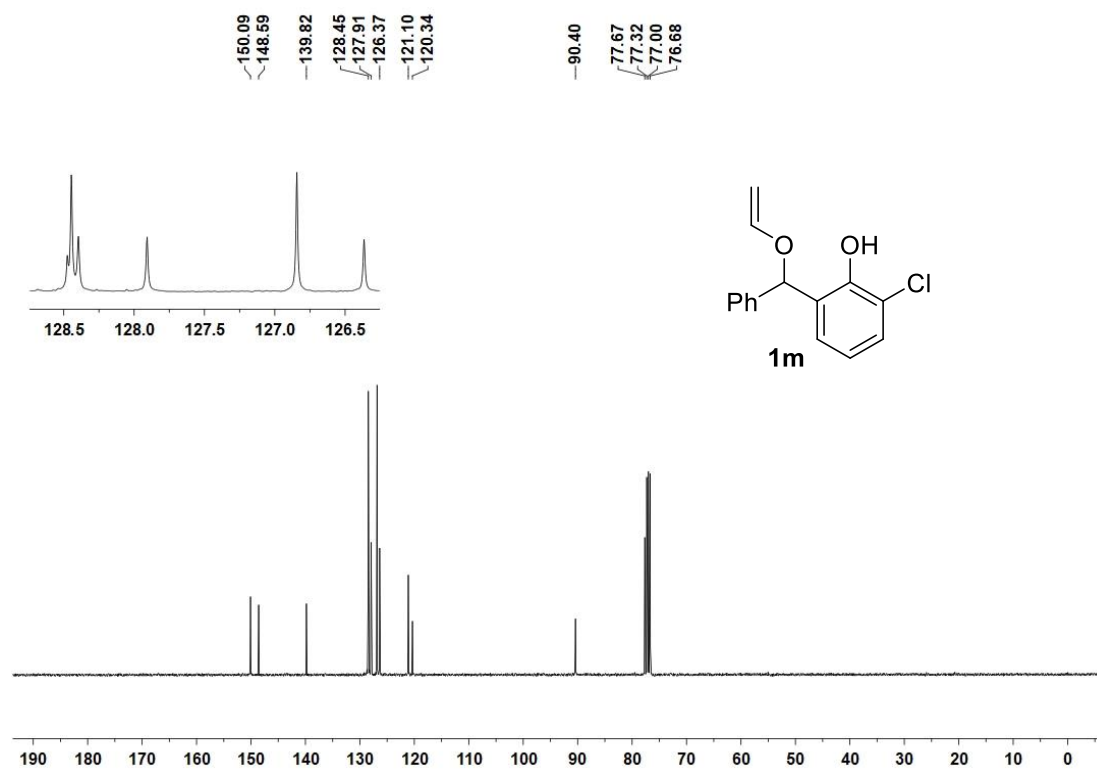

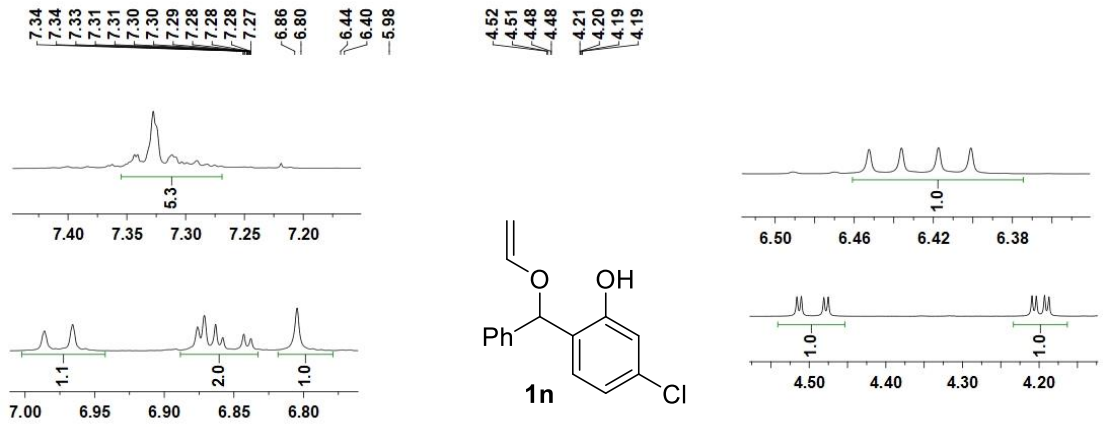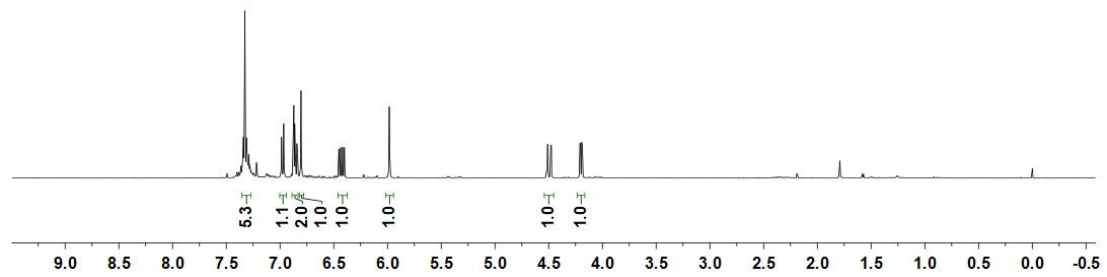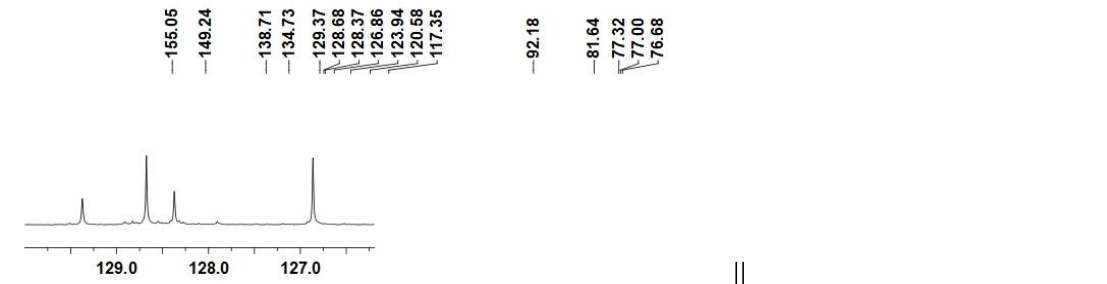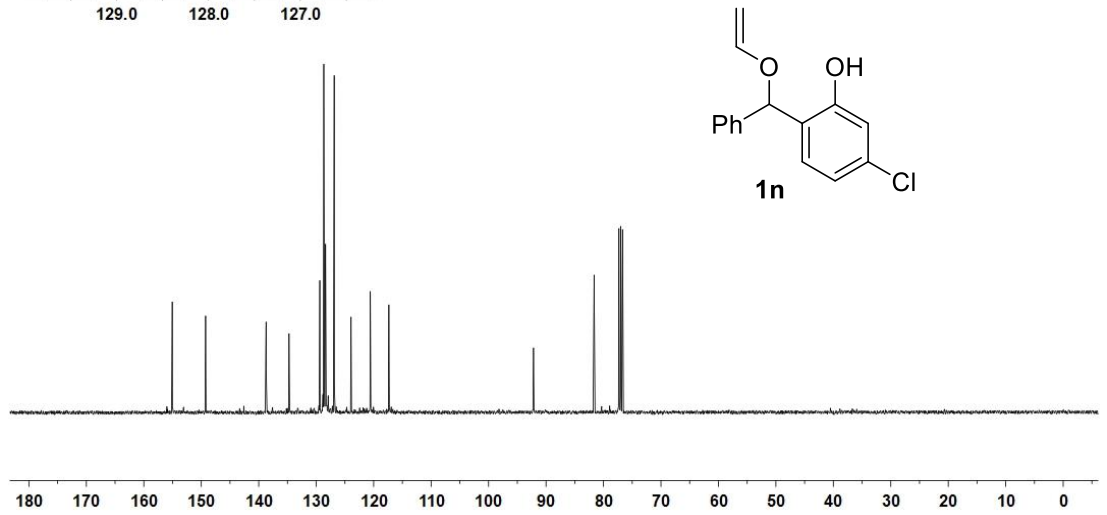

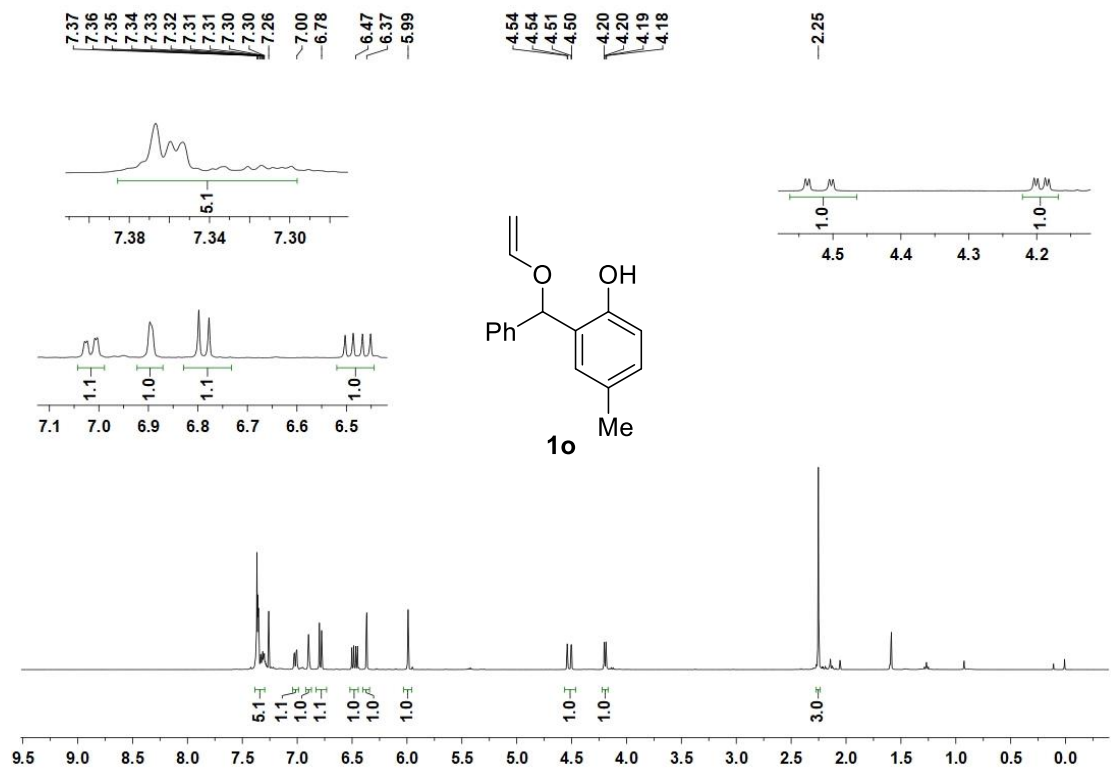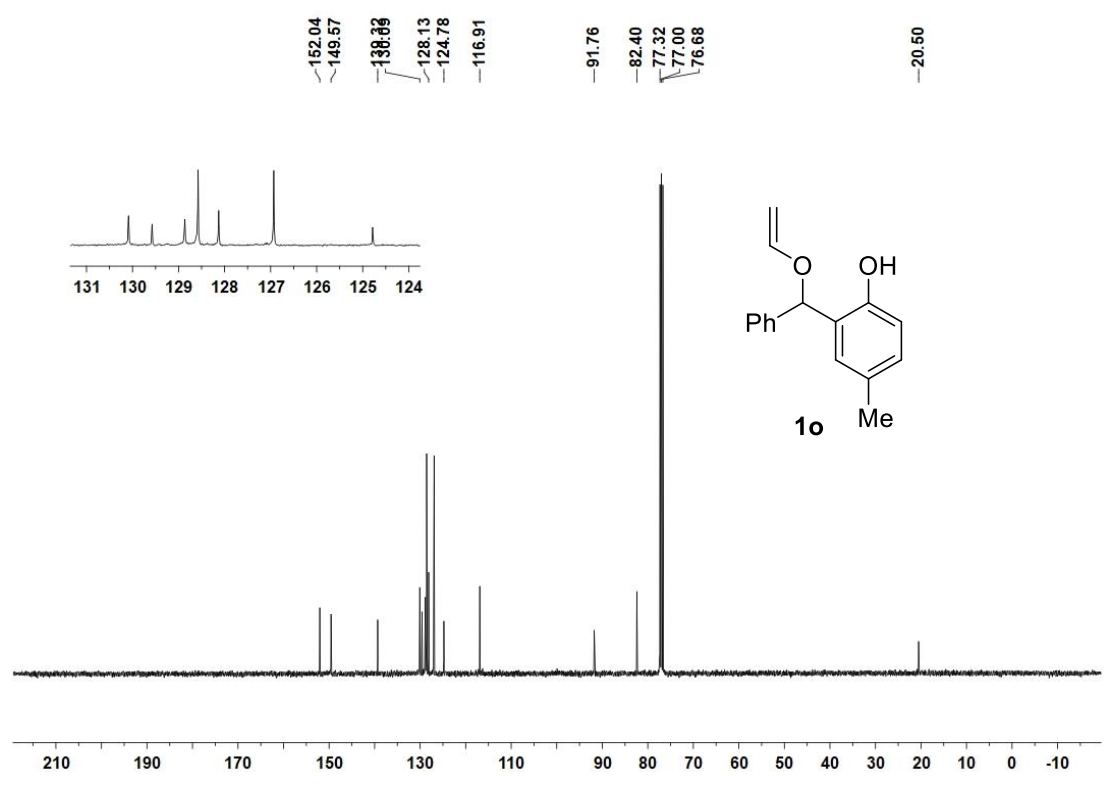

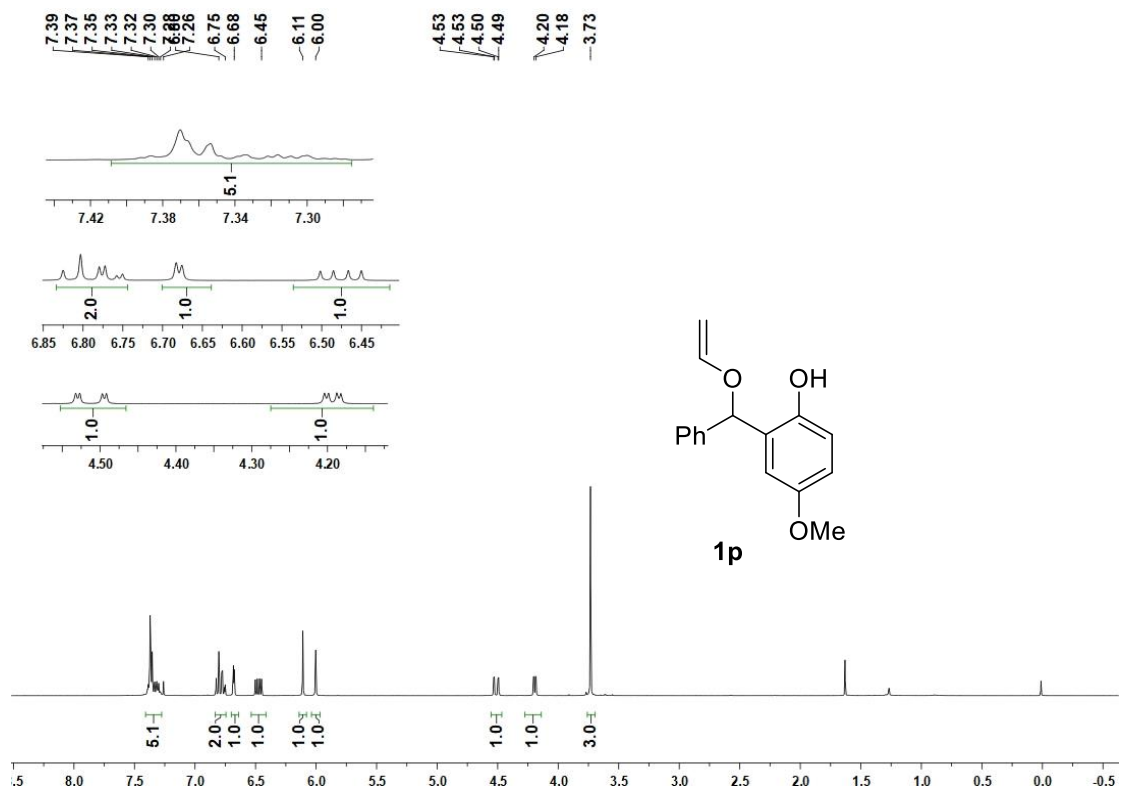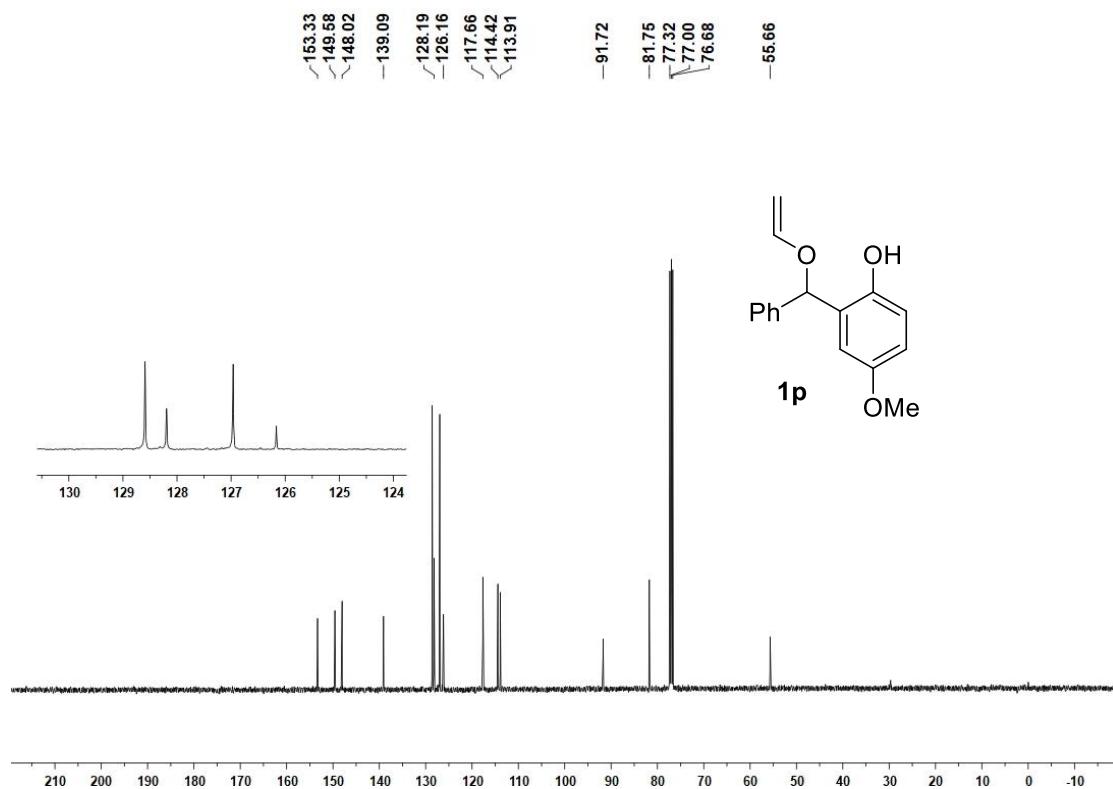

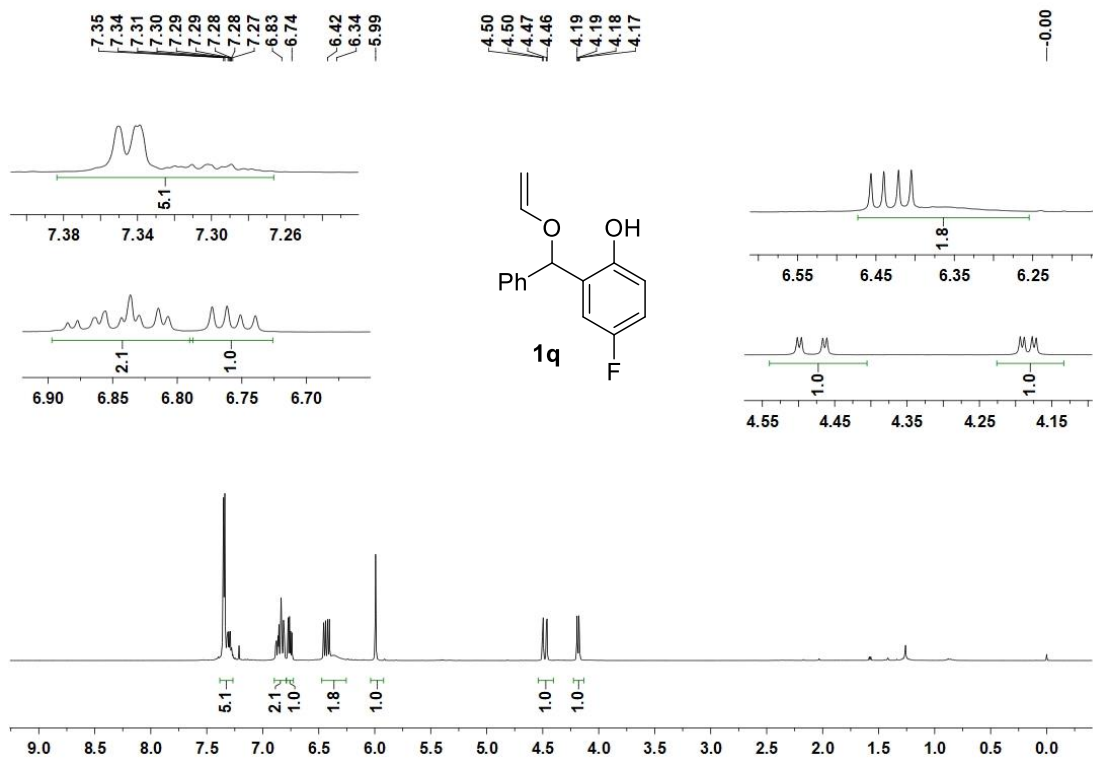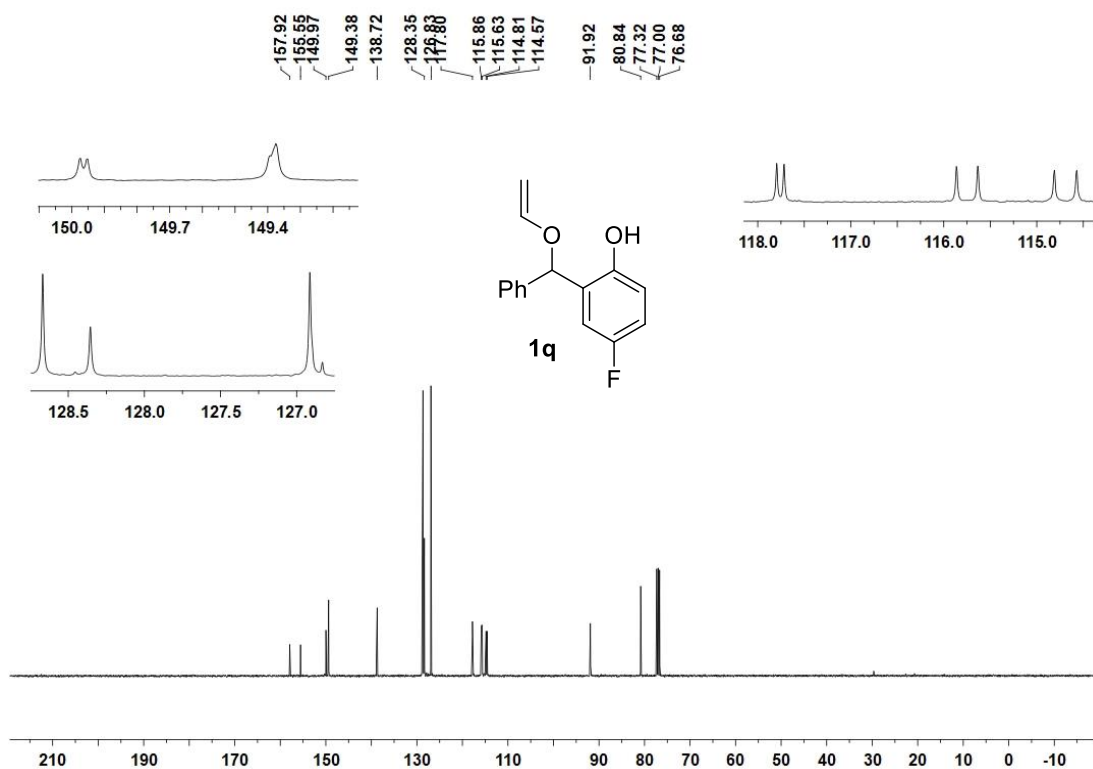

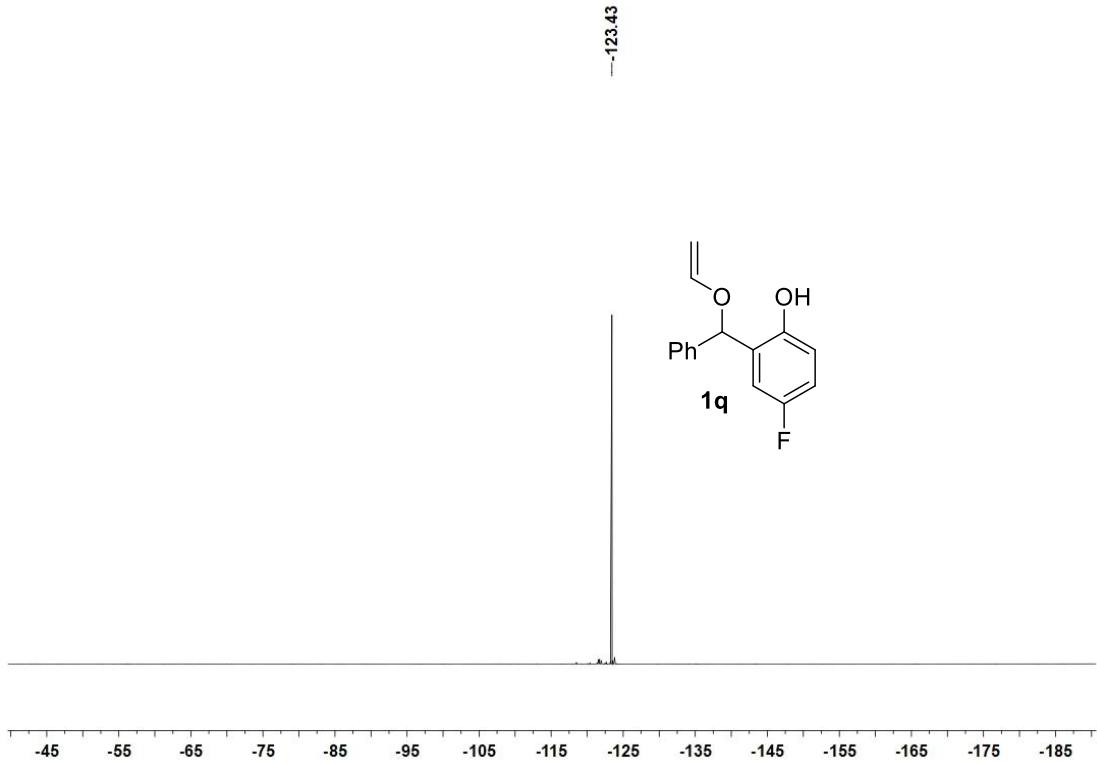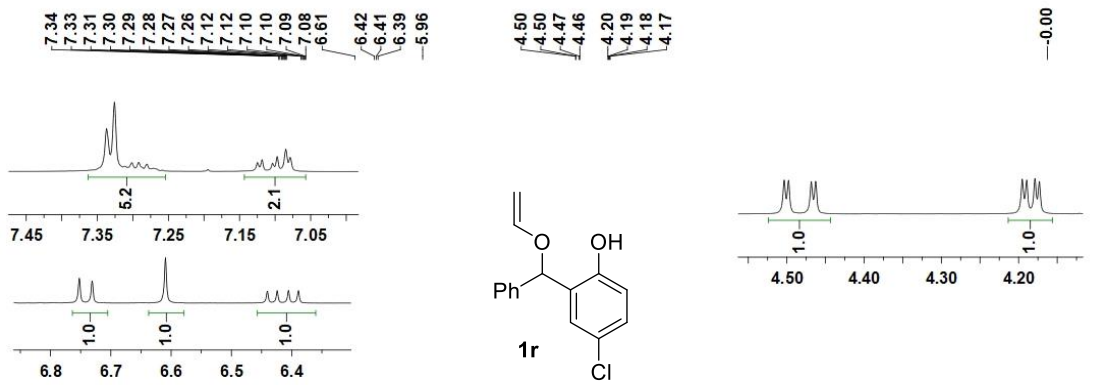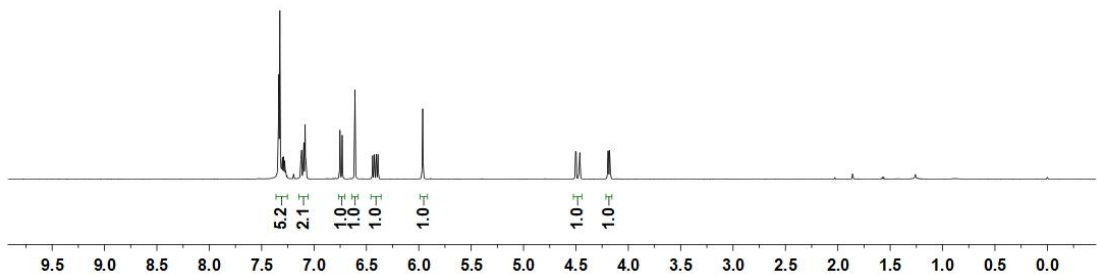

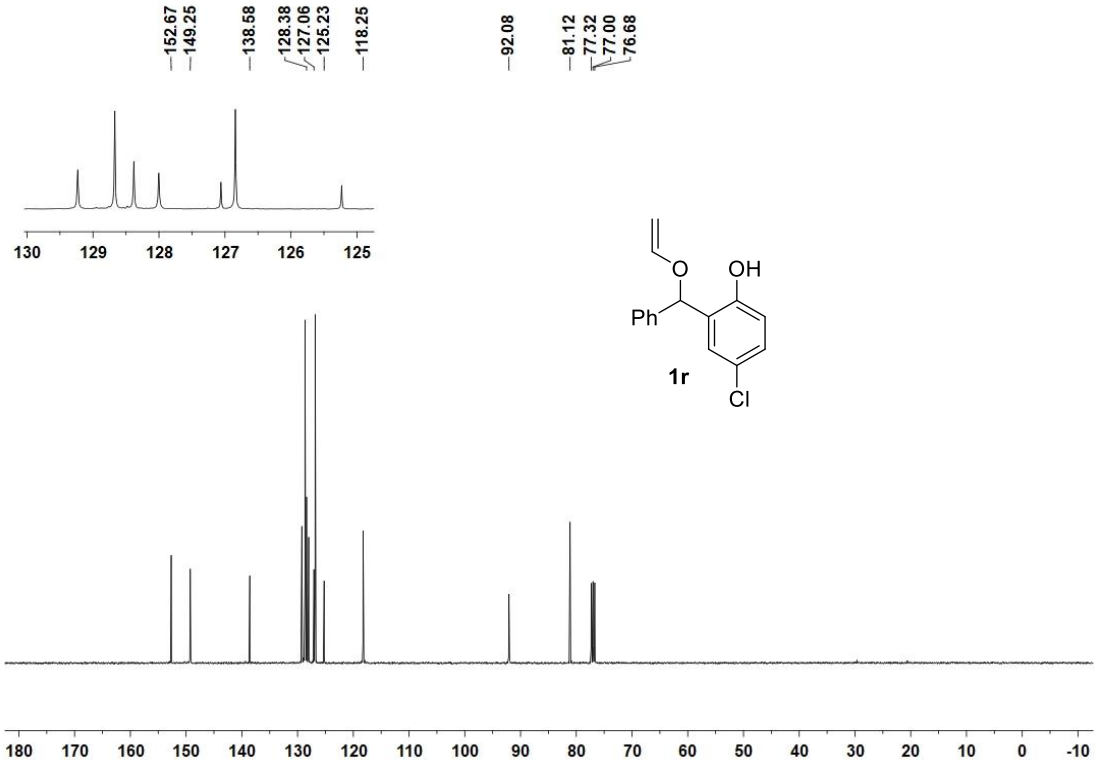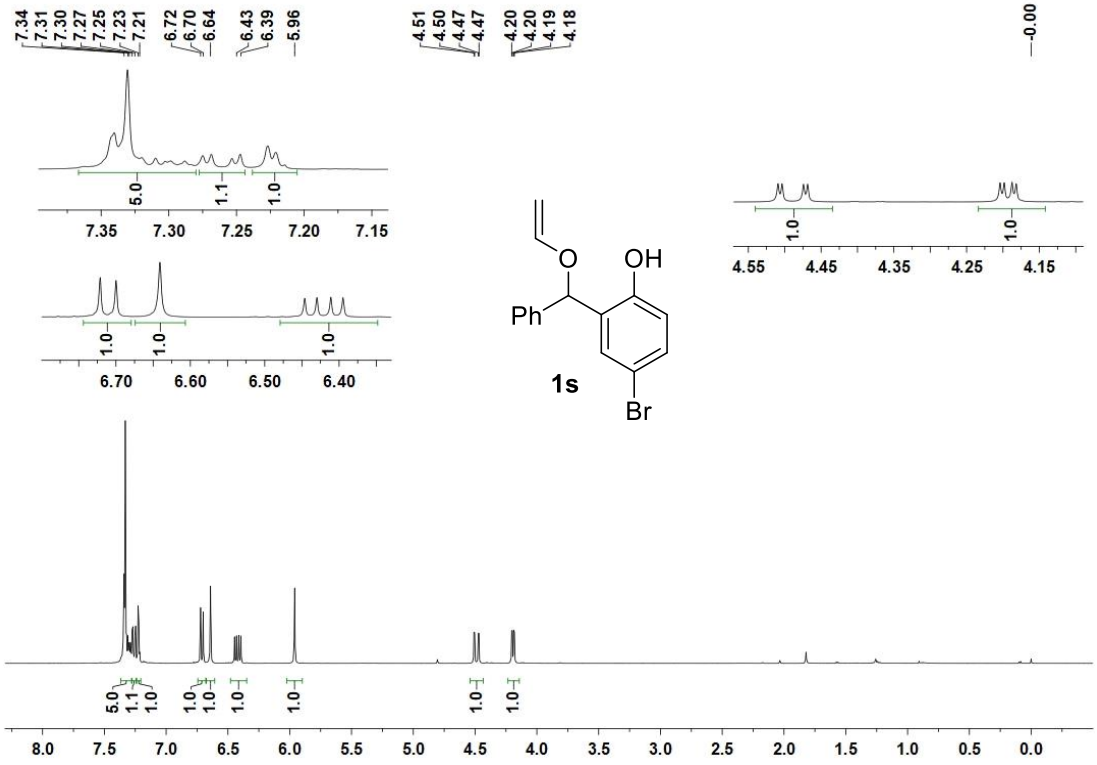



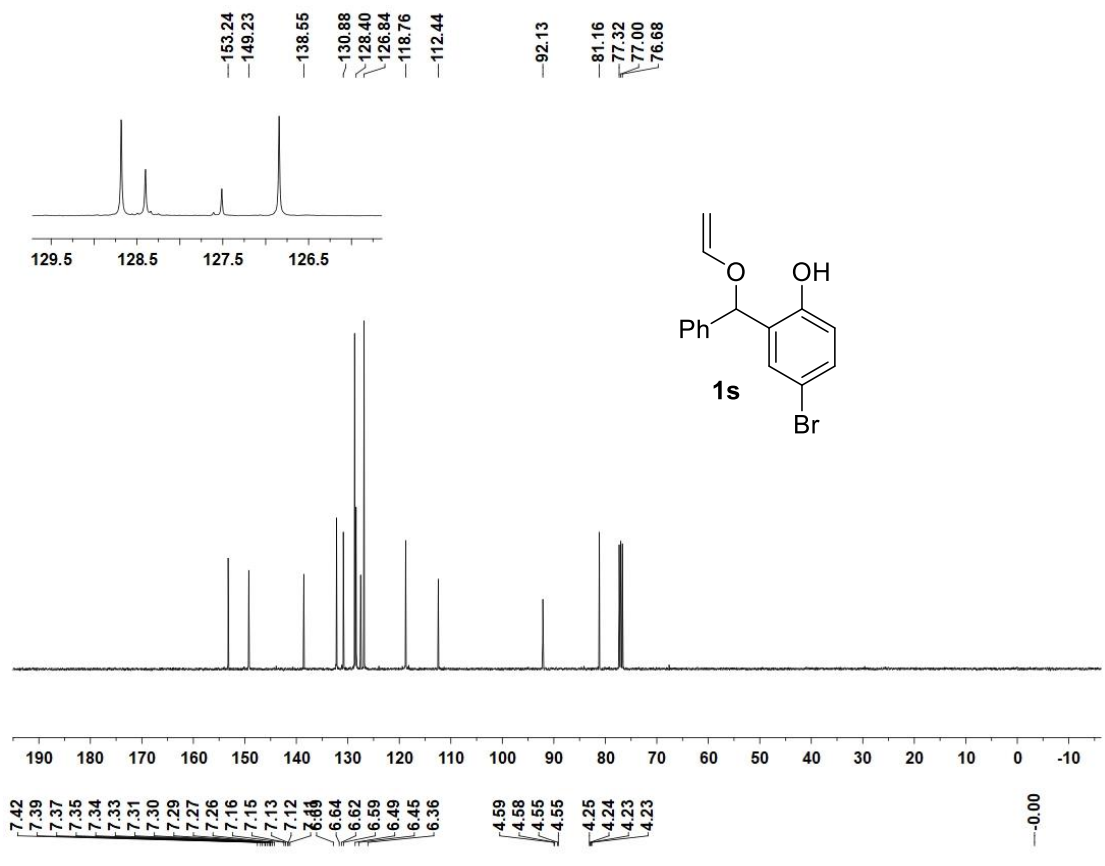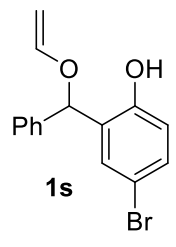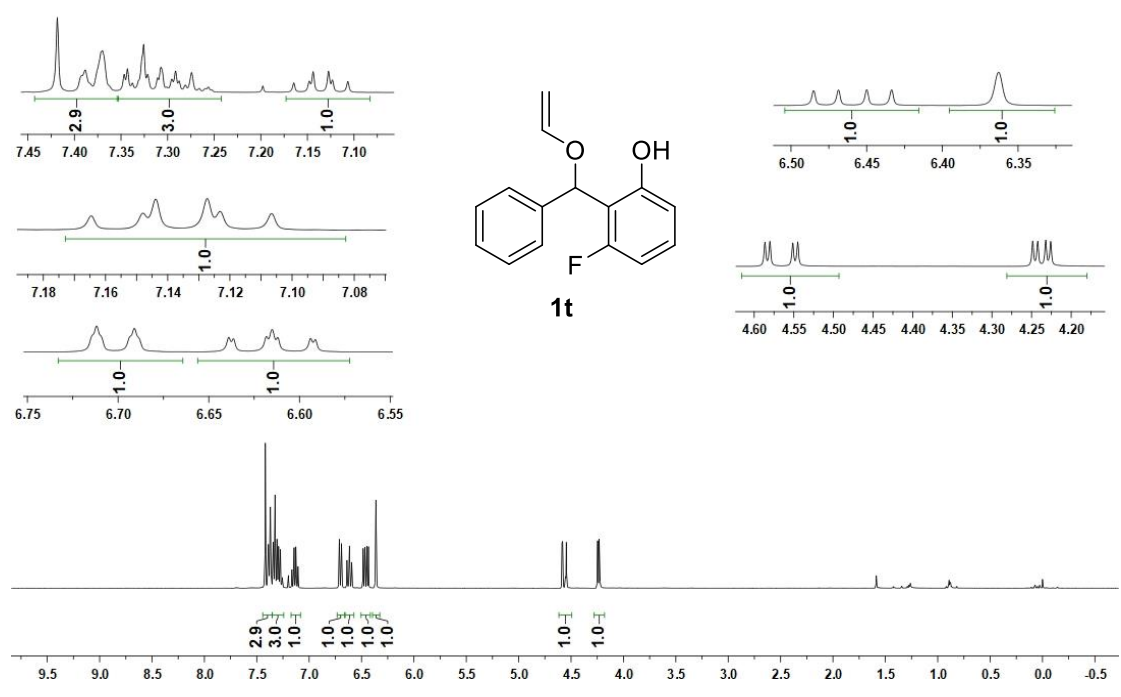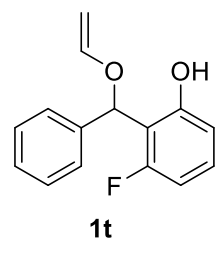

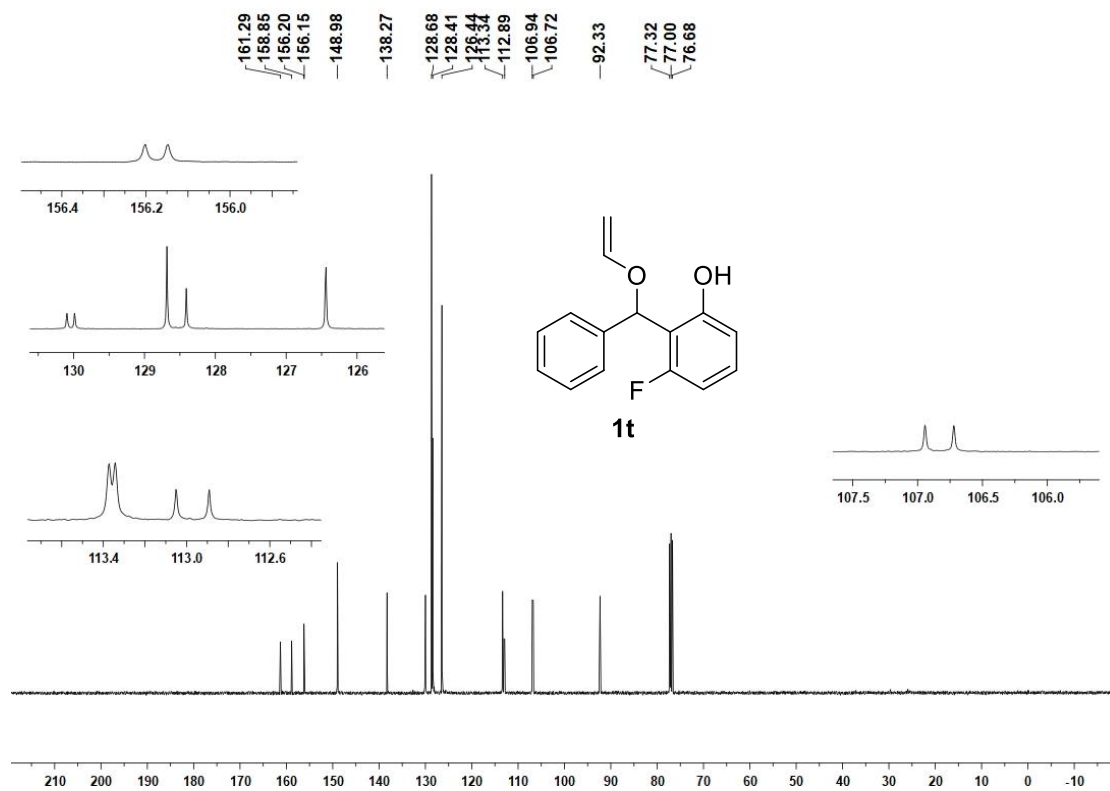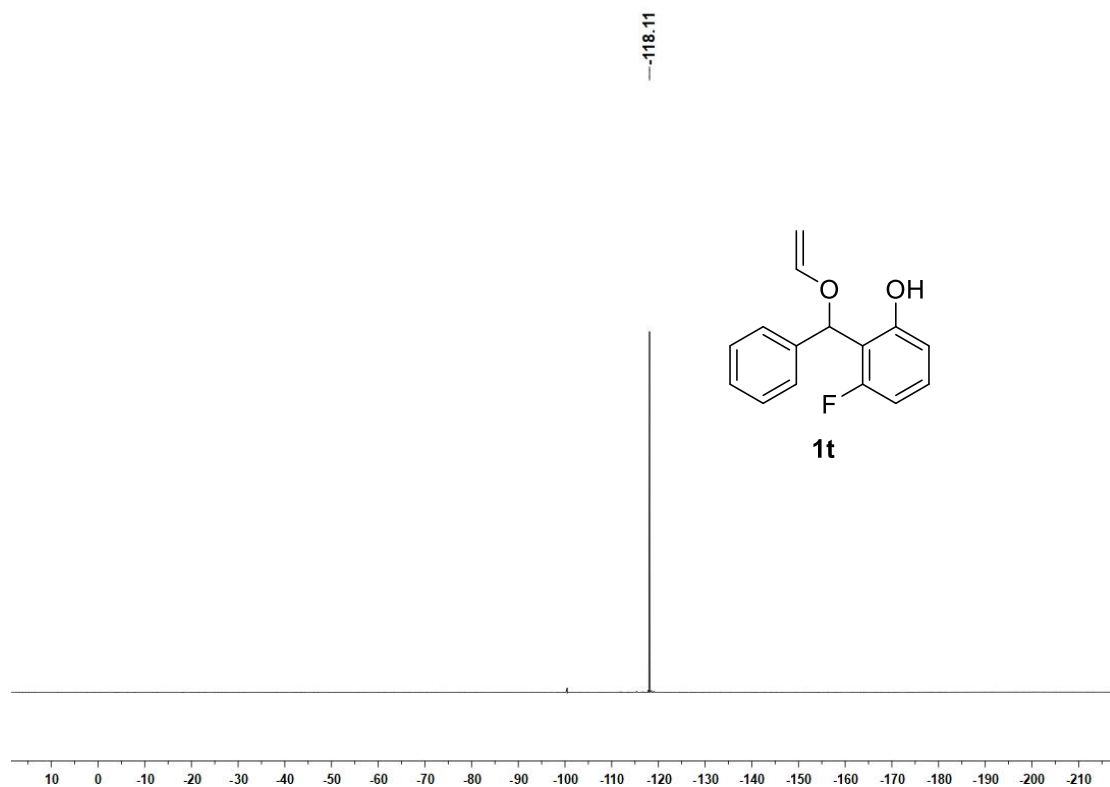

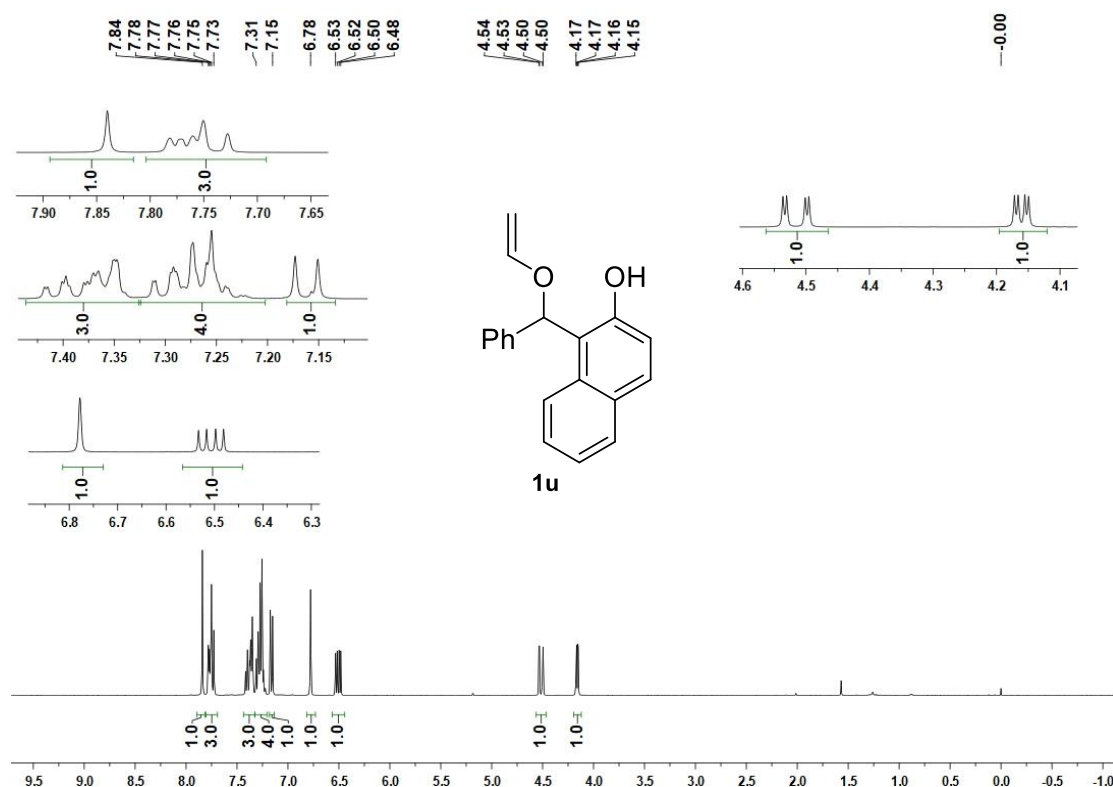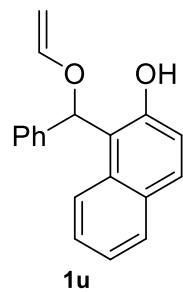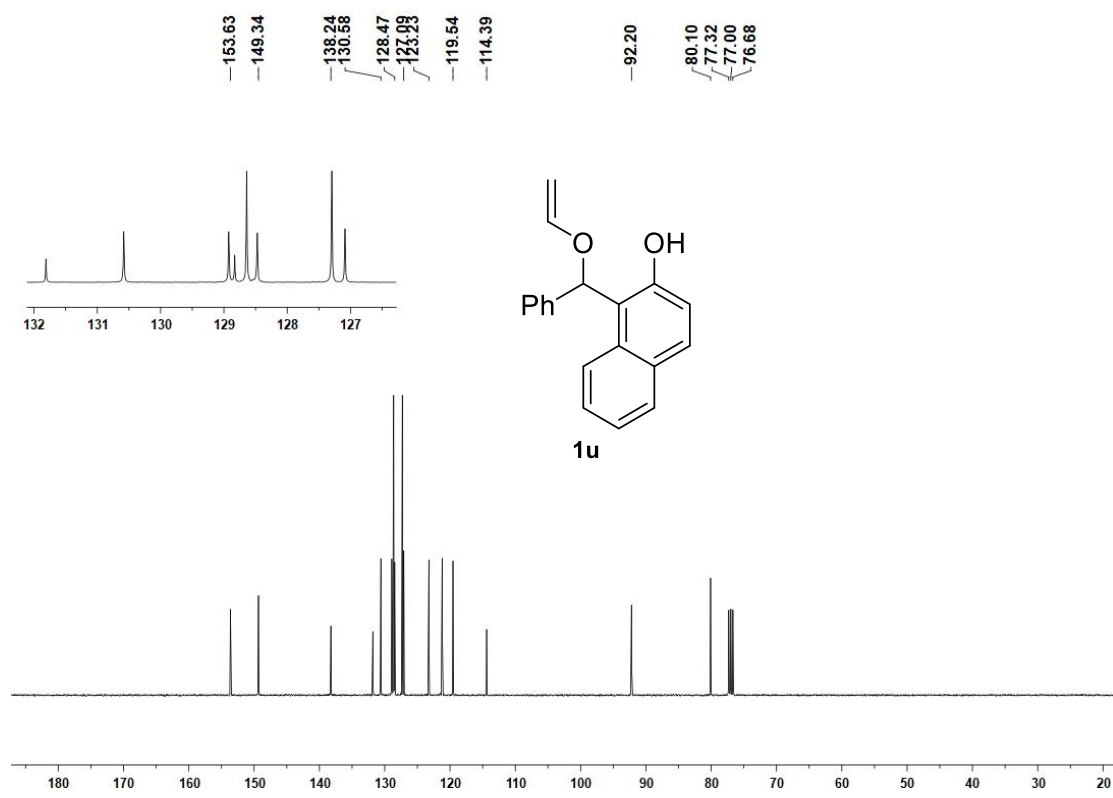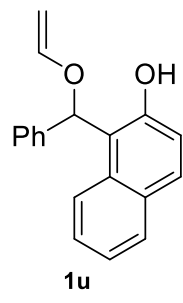

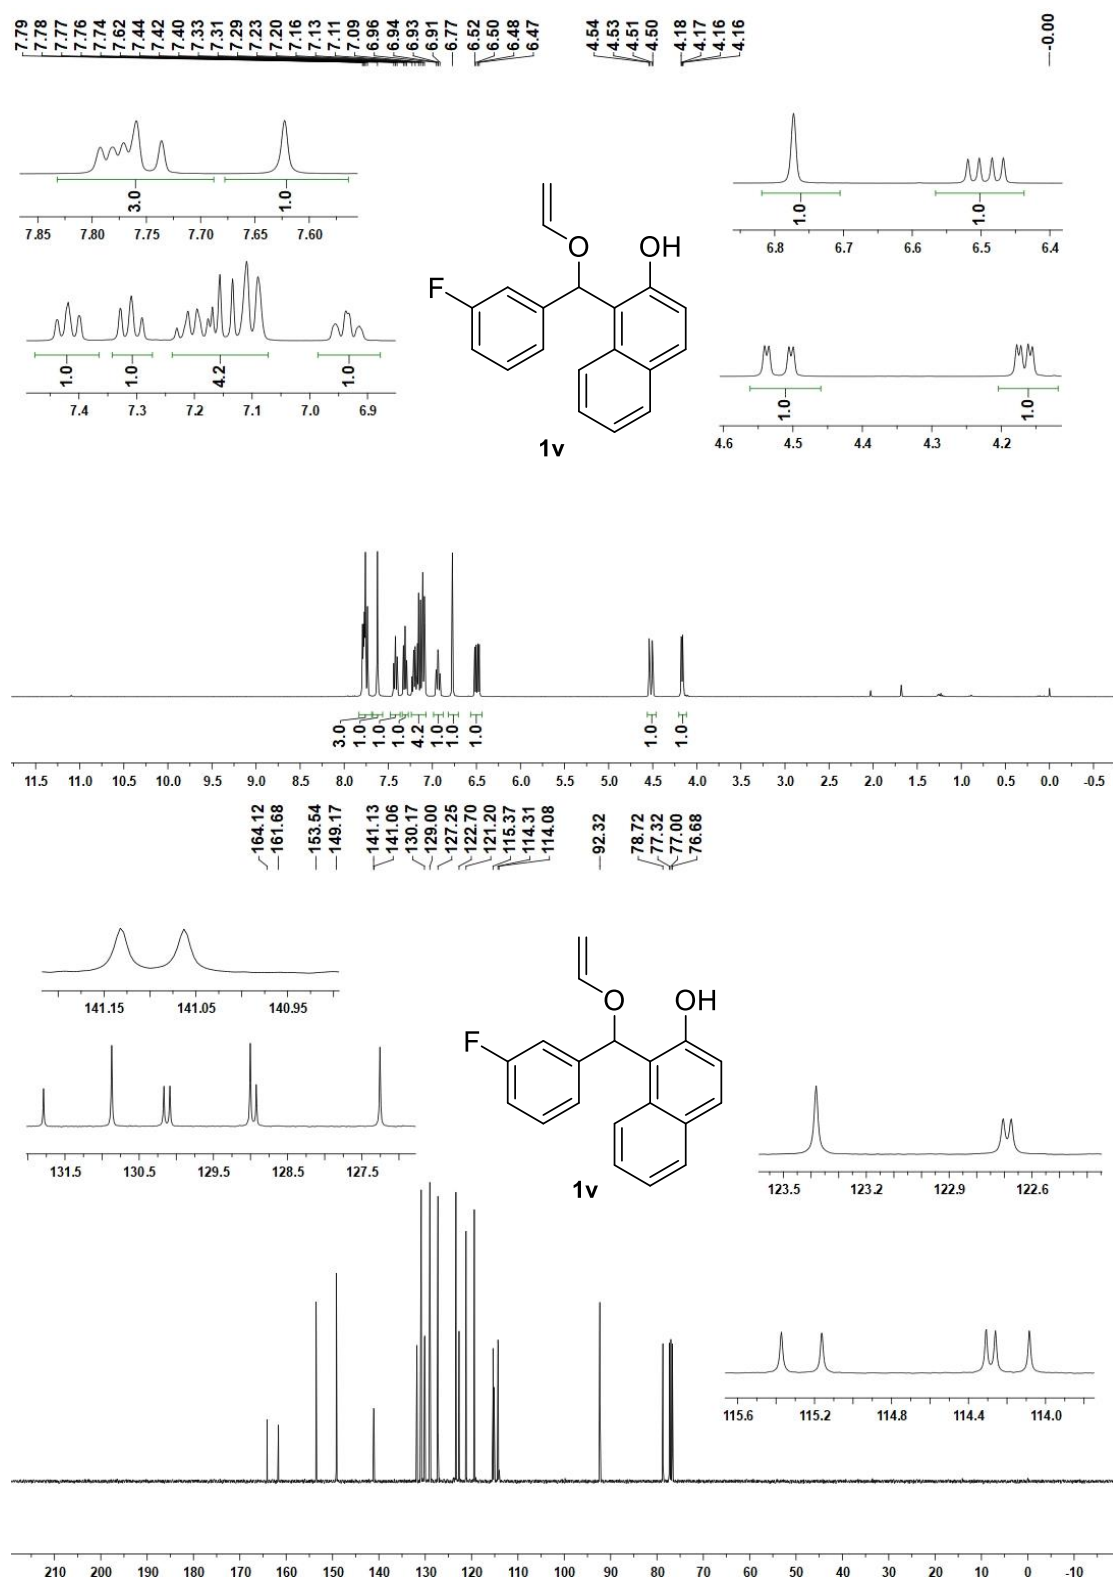

--112.18

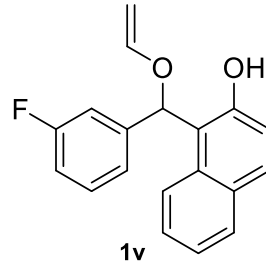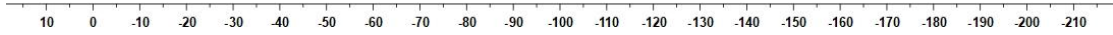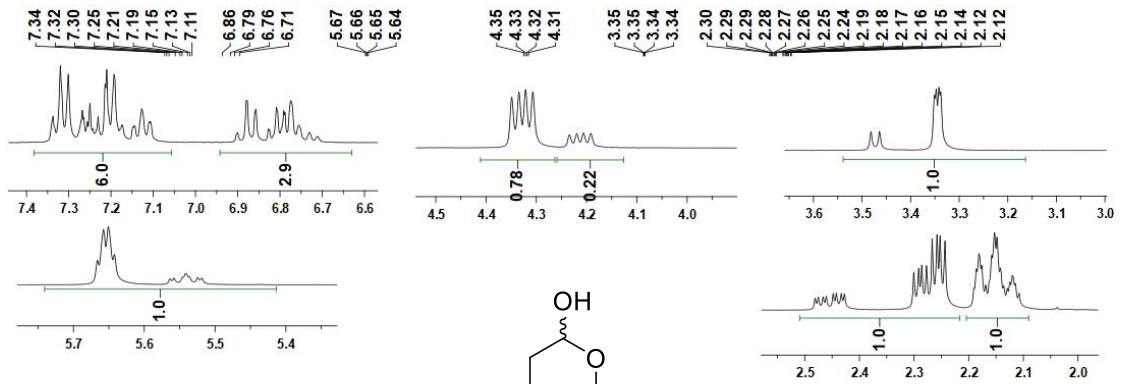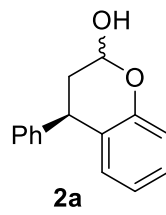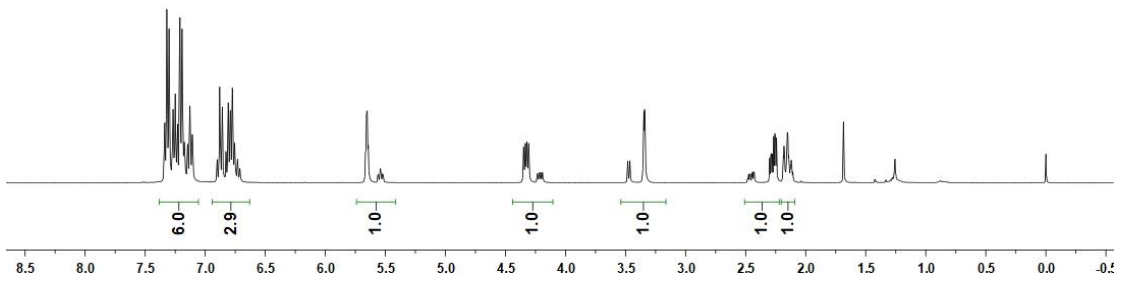

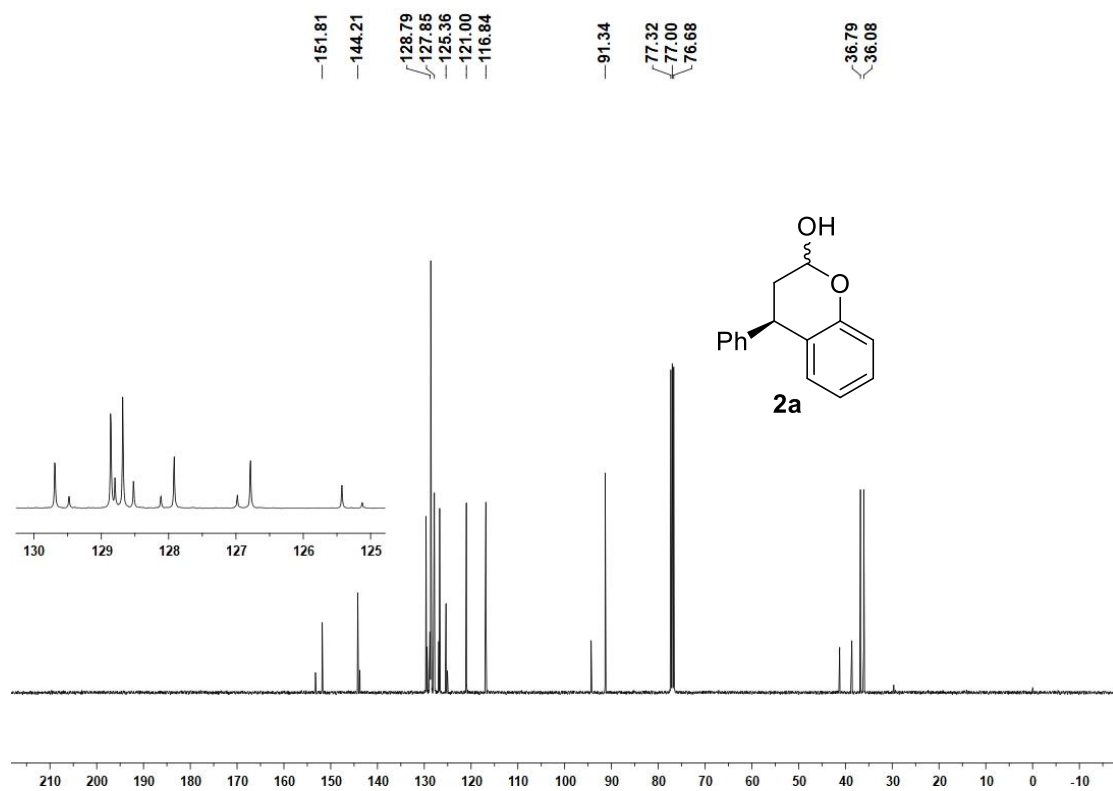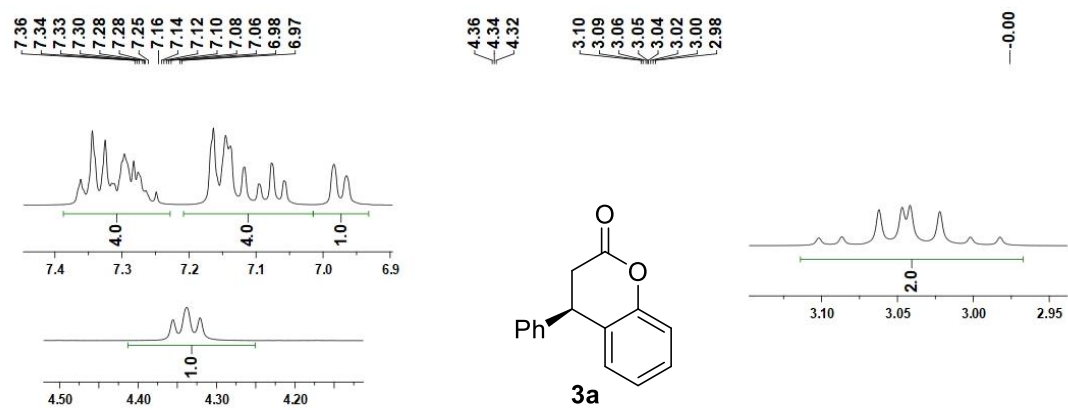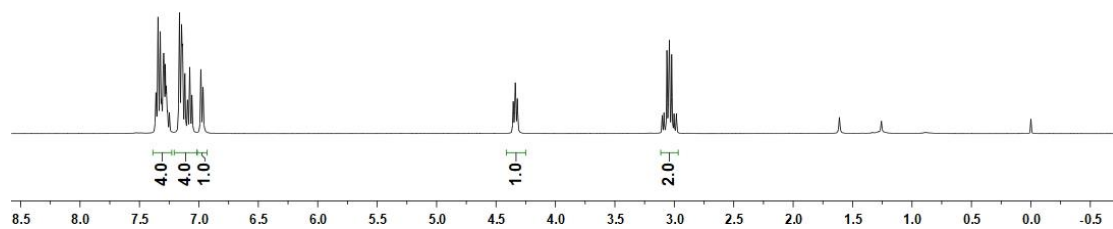

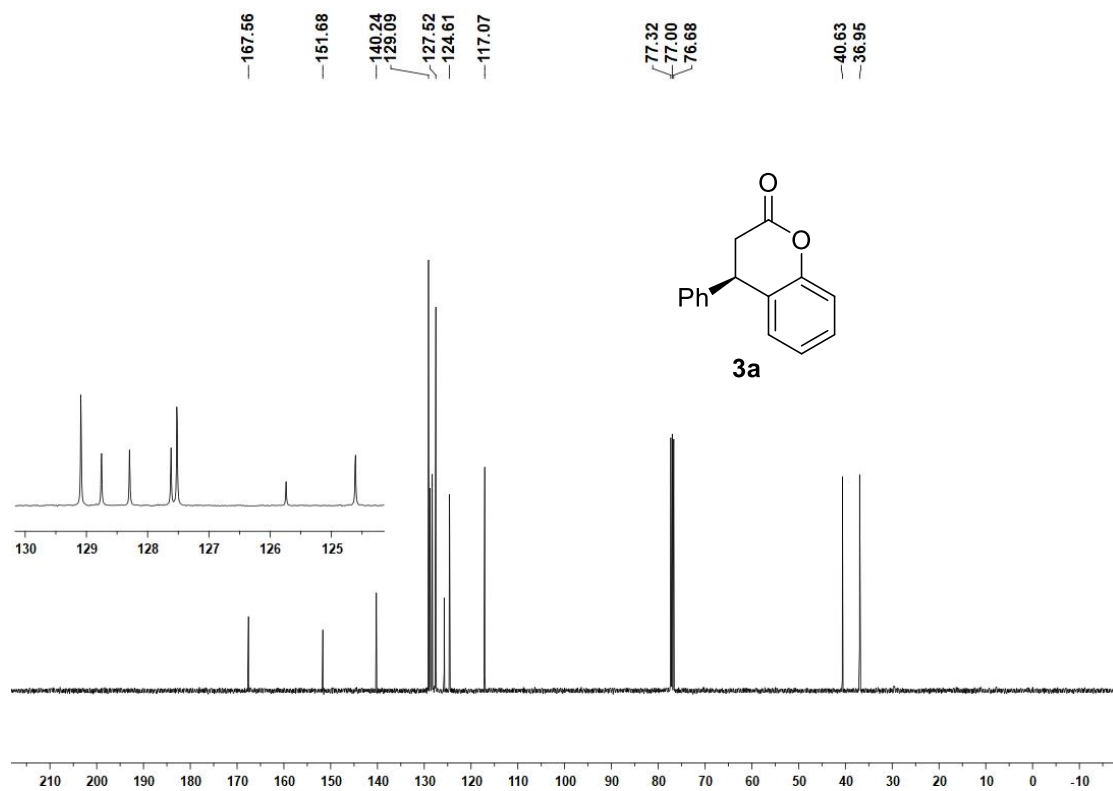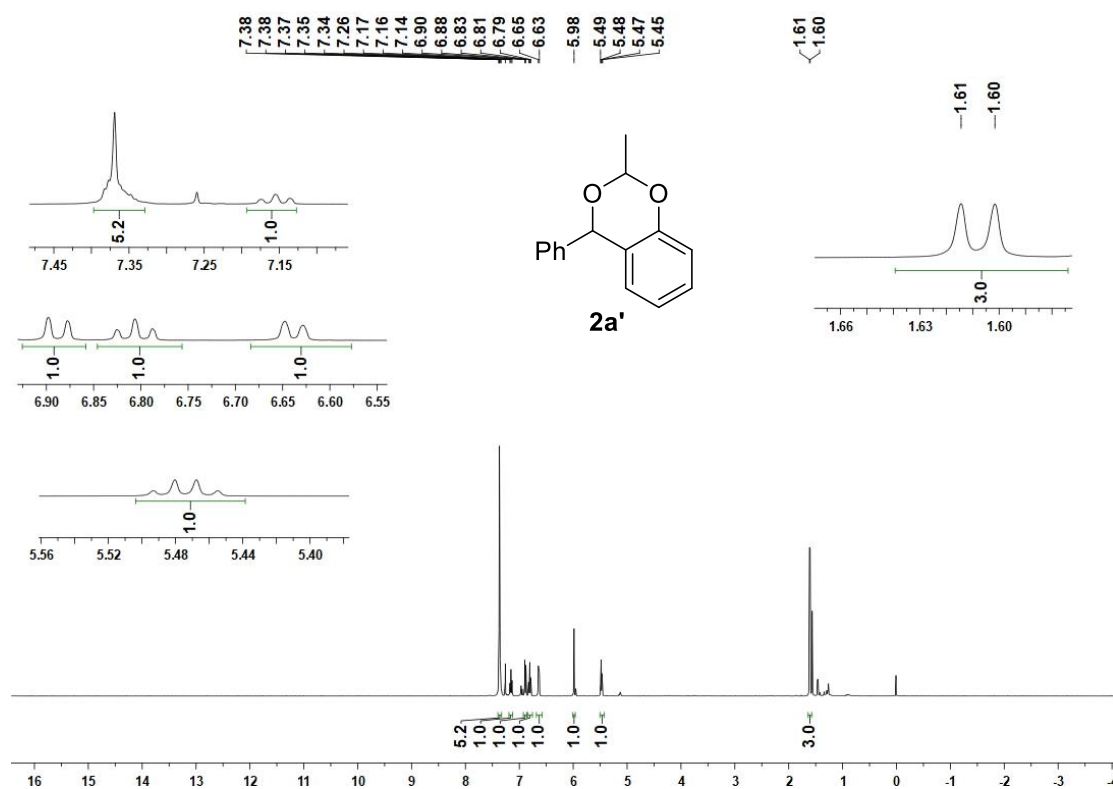

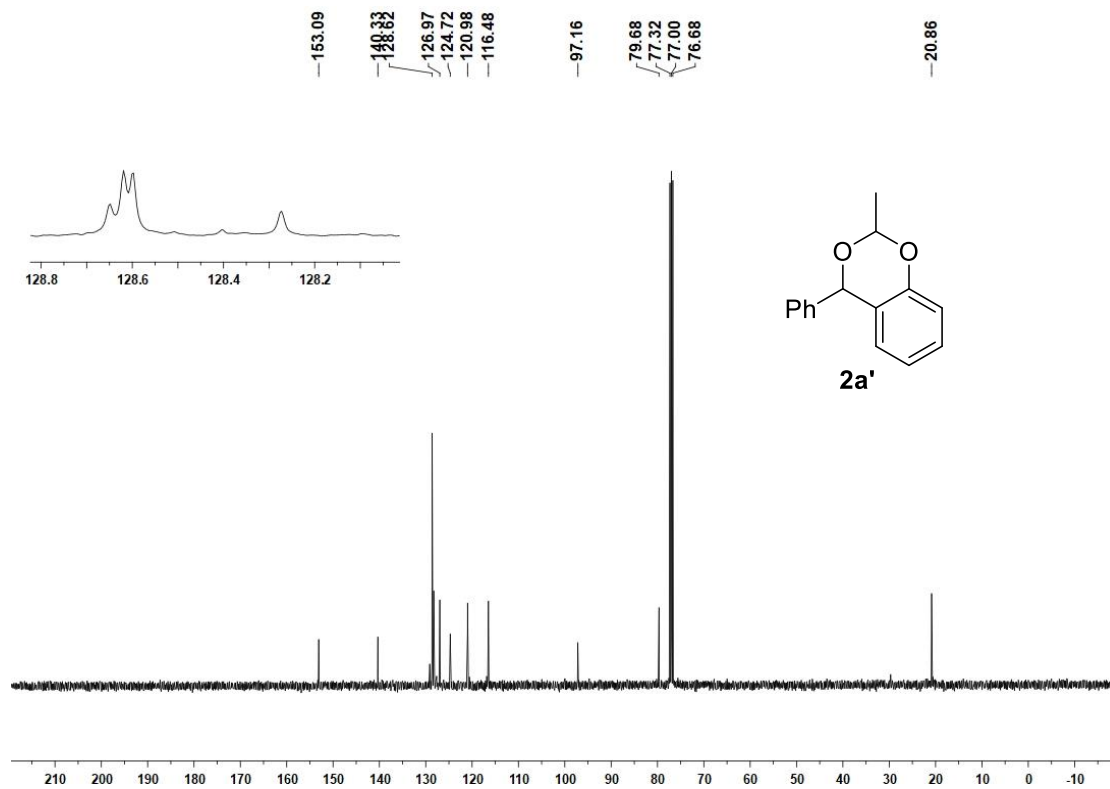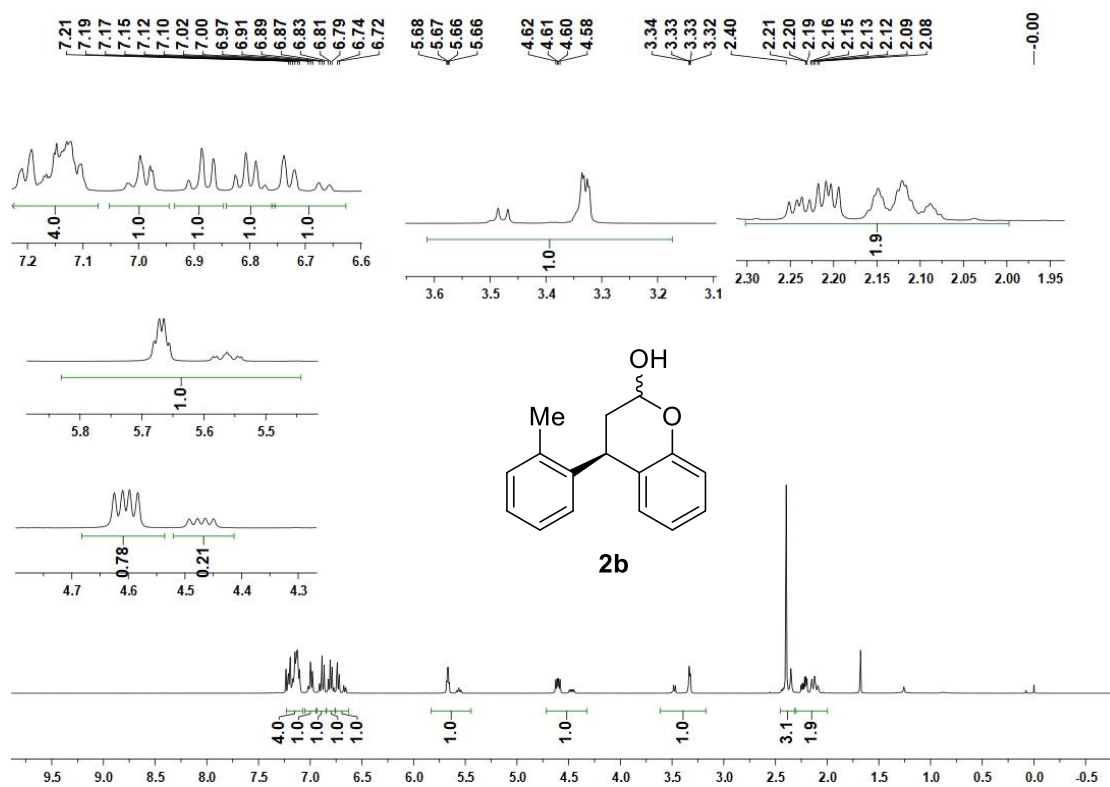



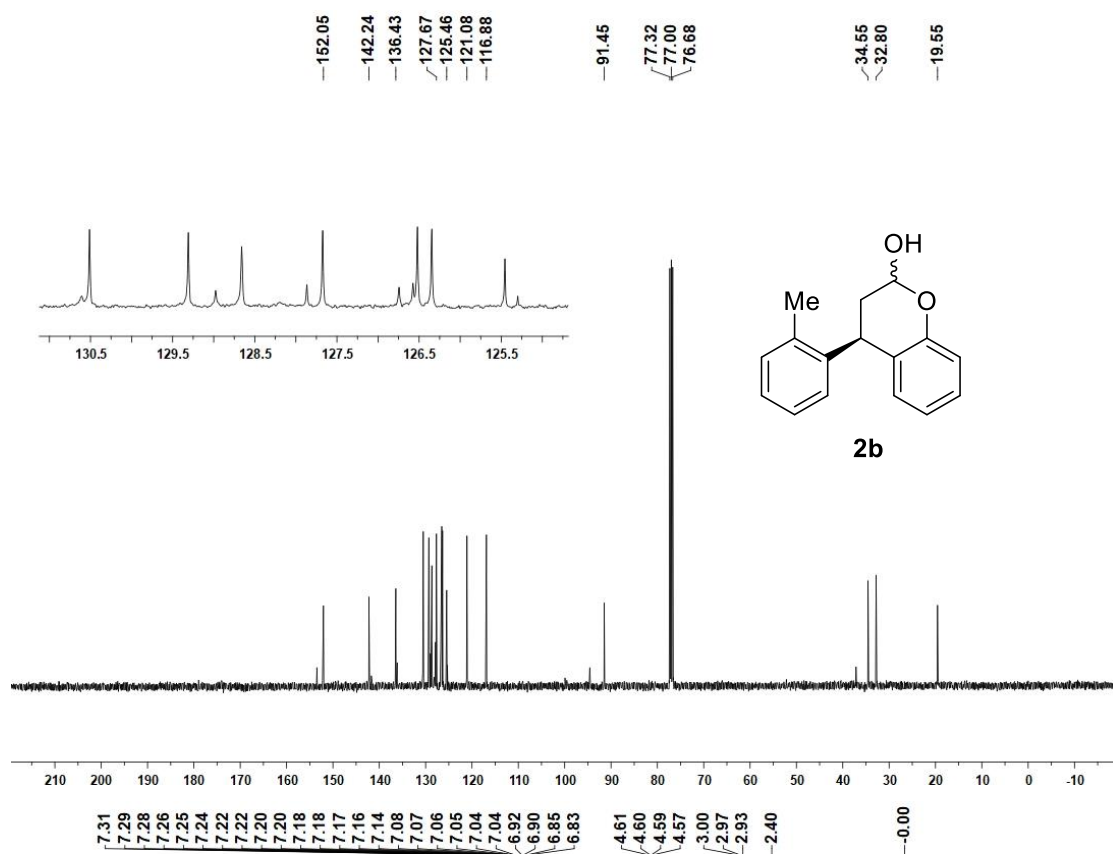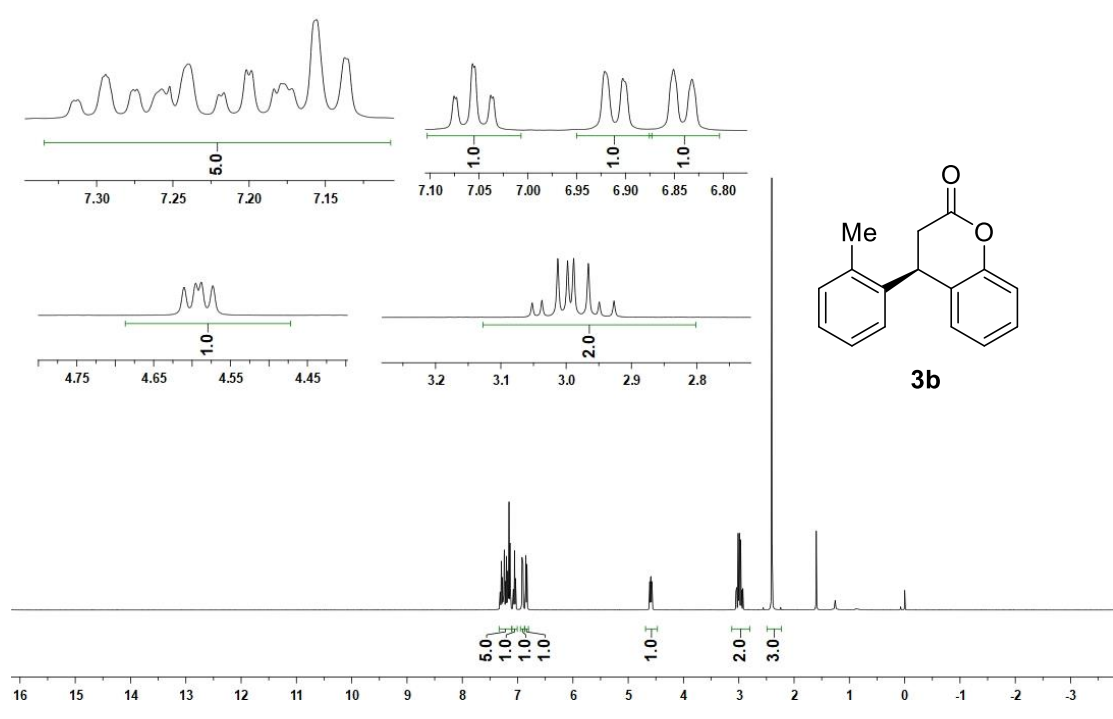

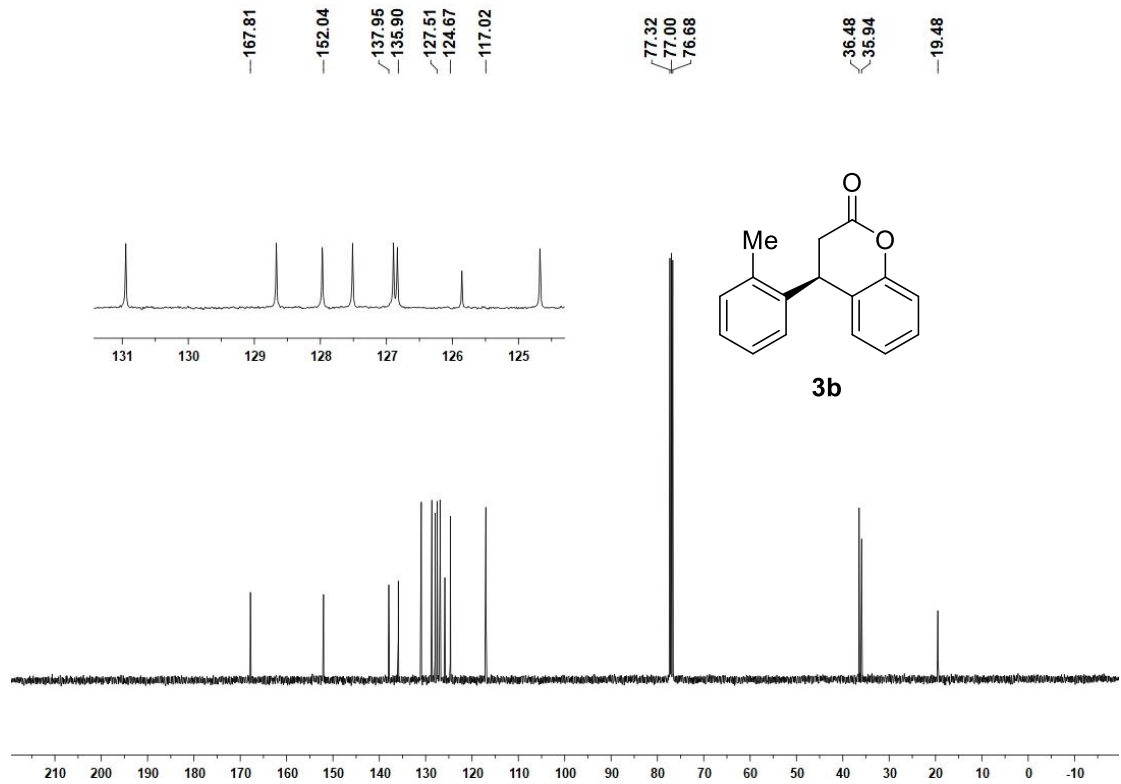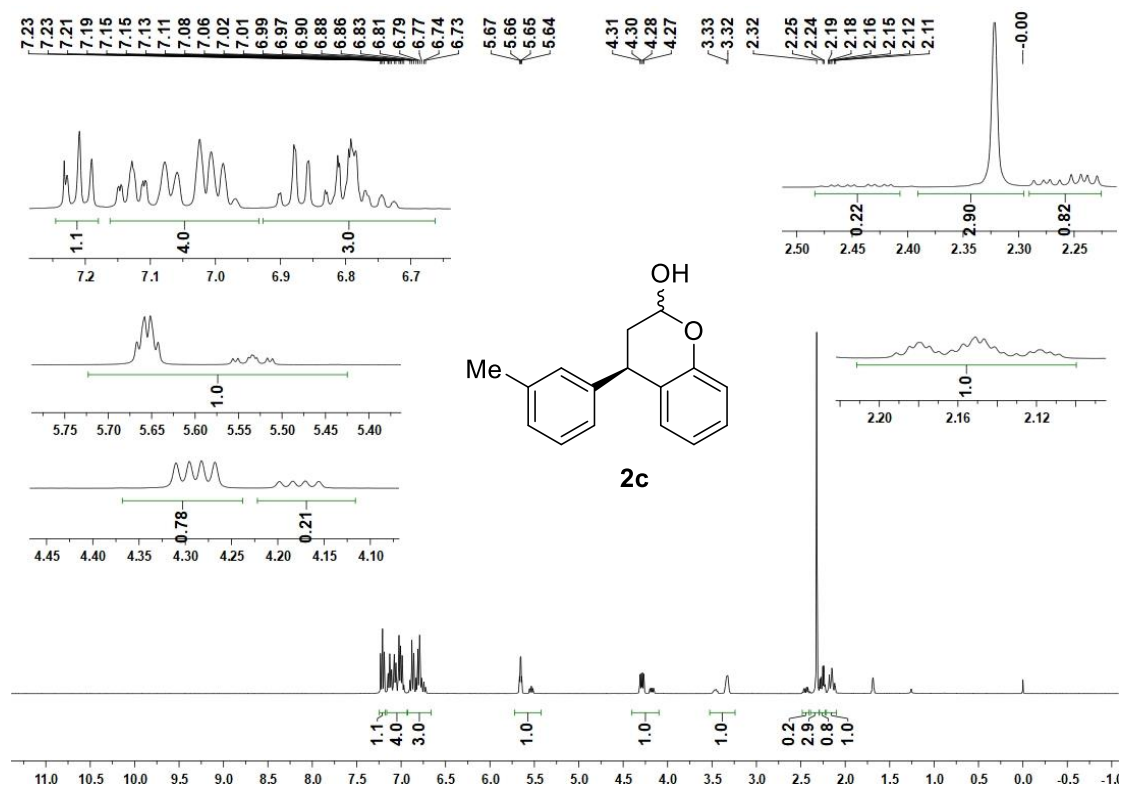

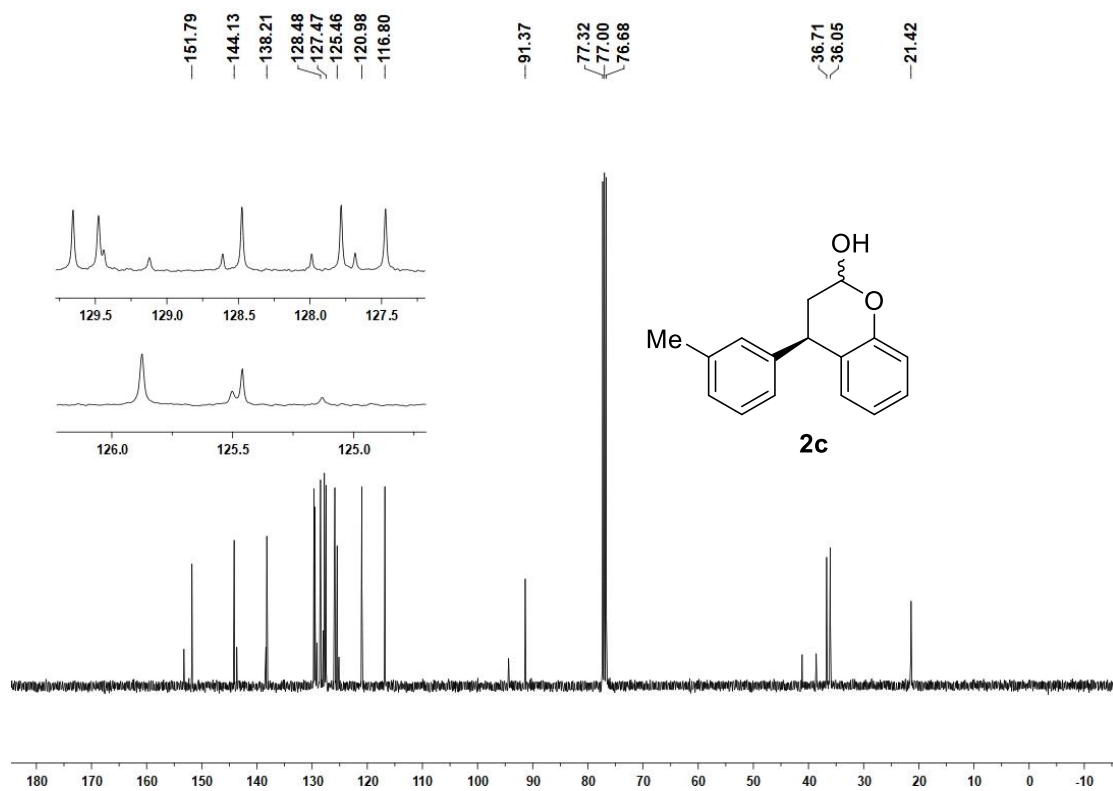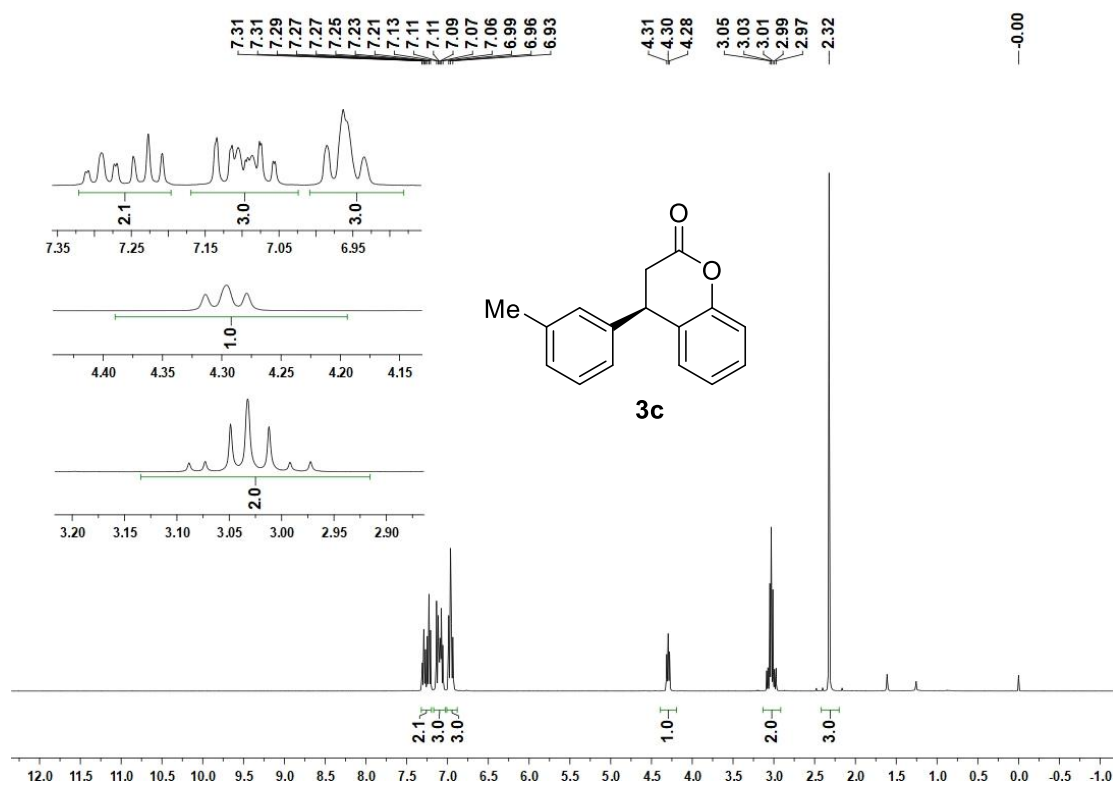

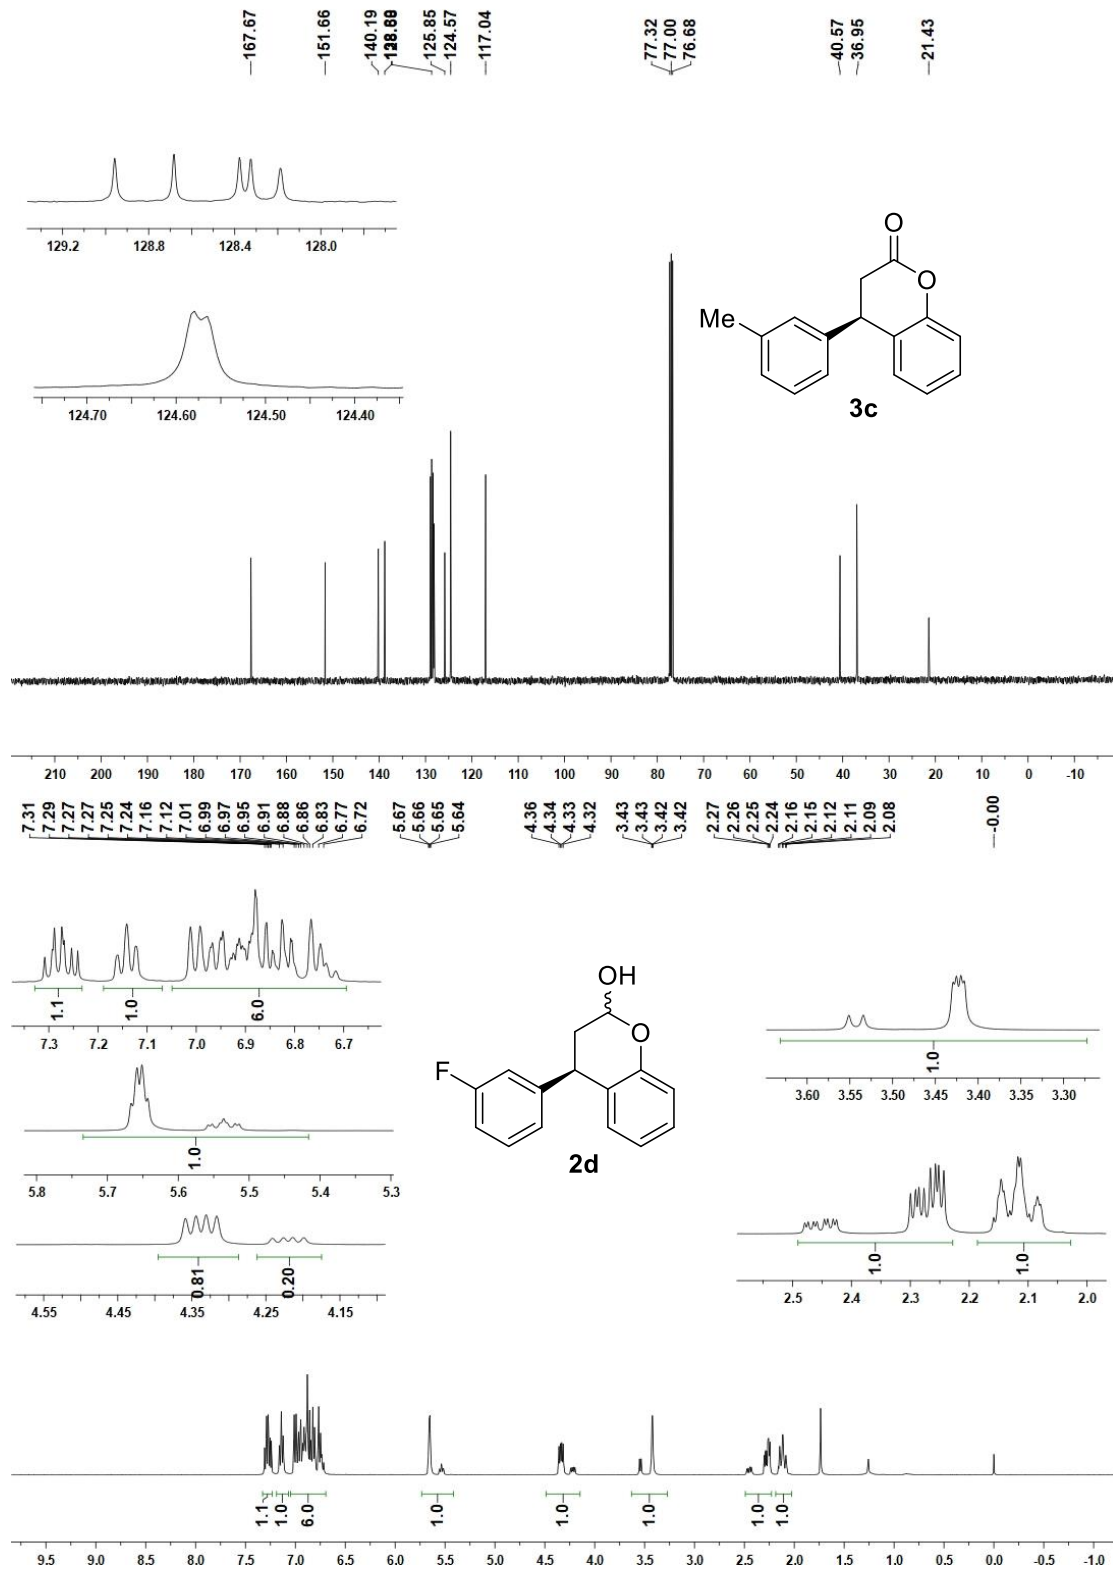

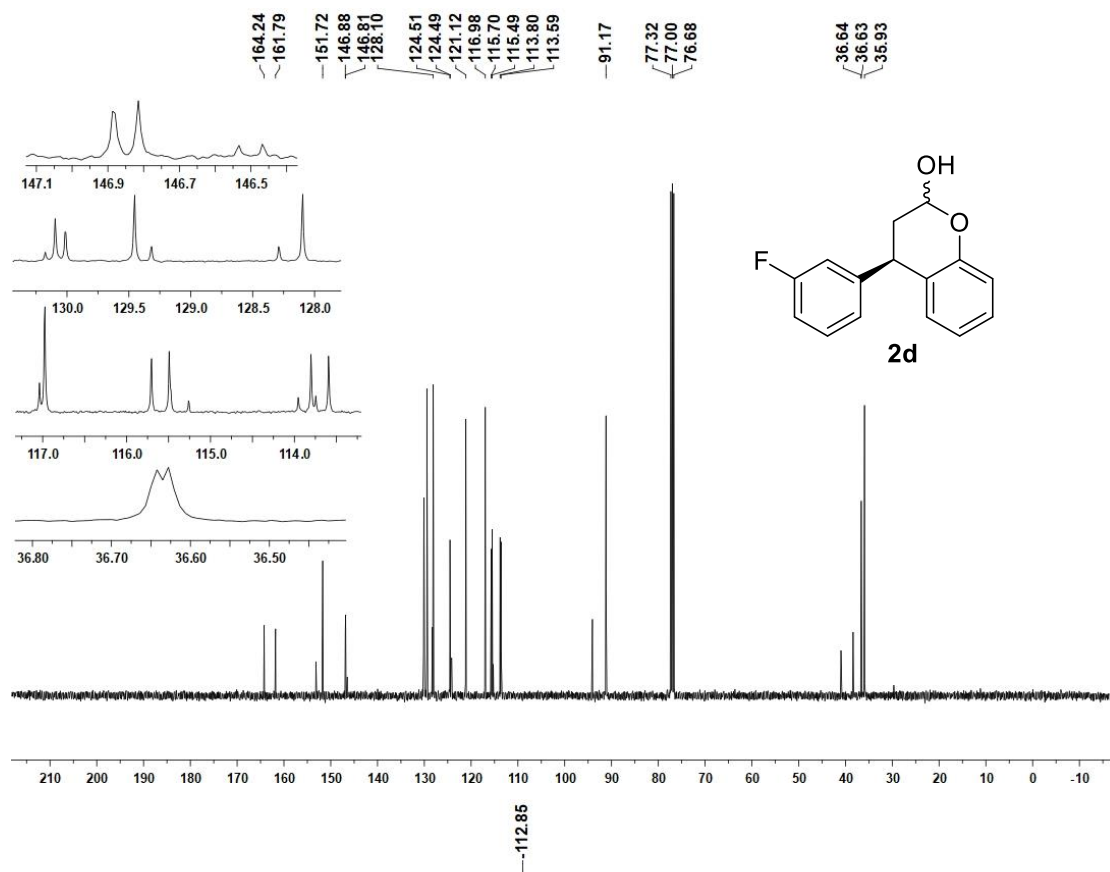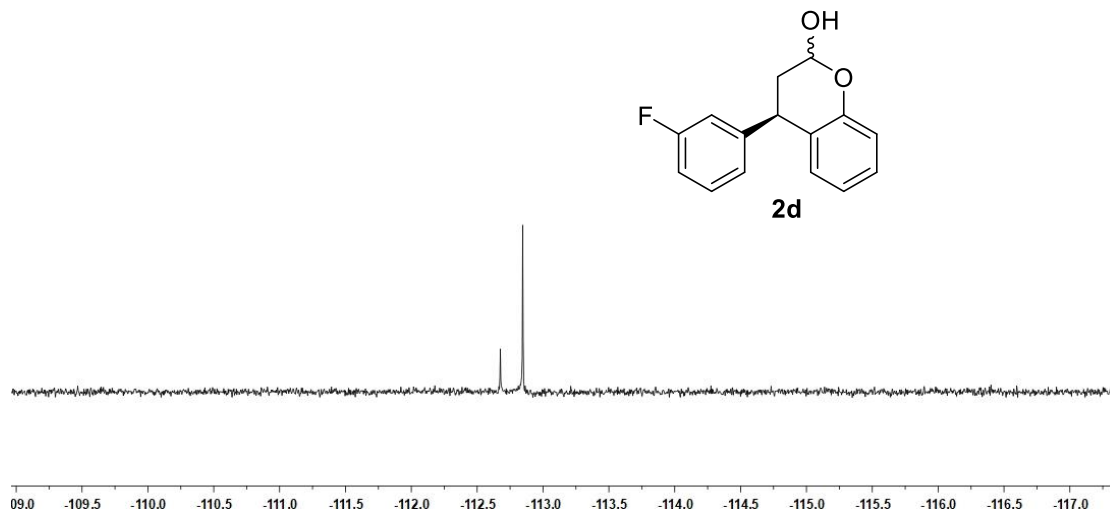

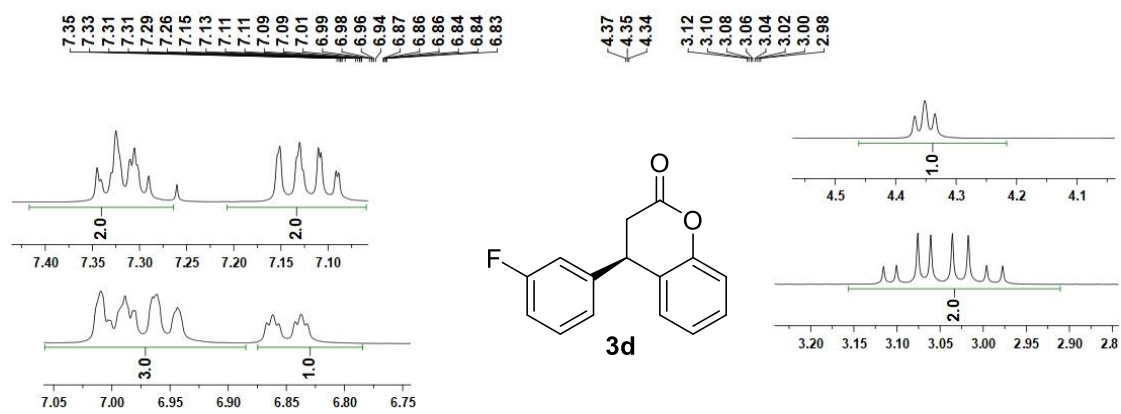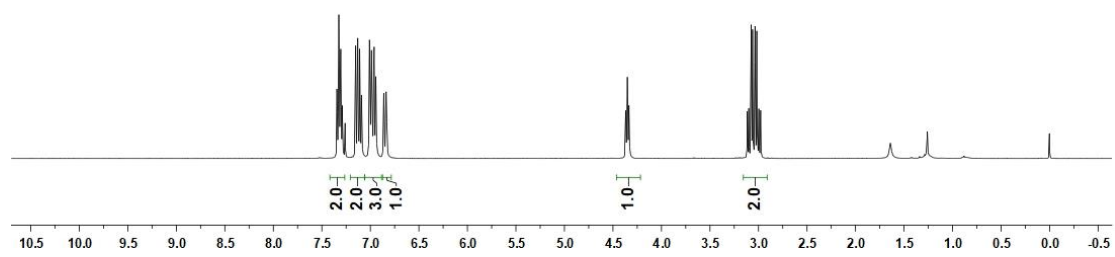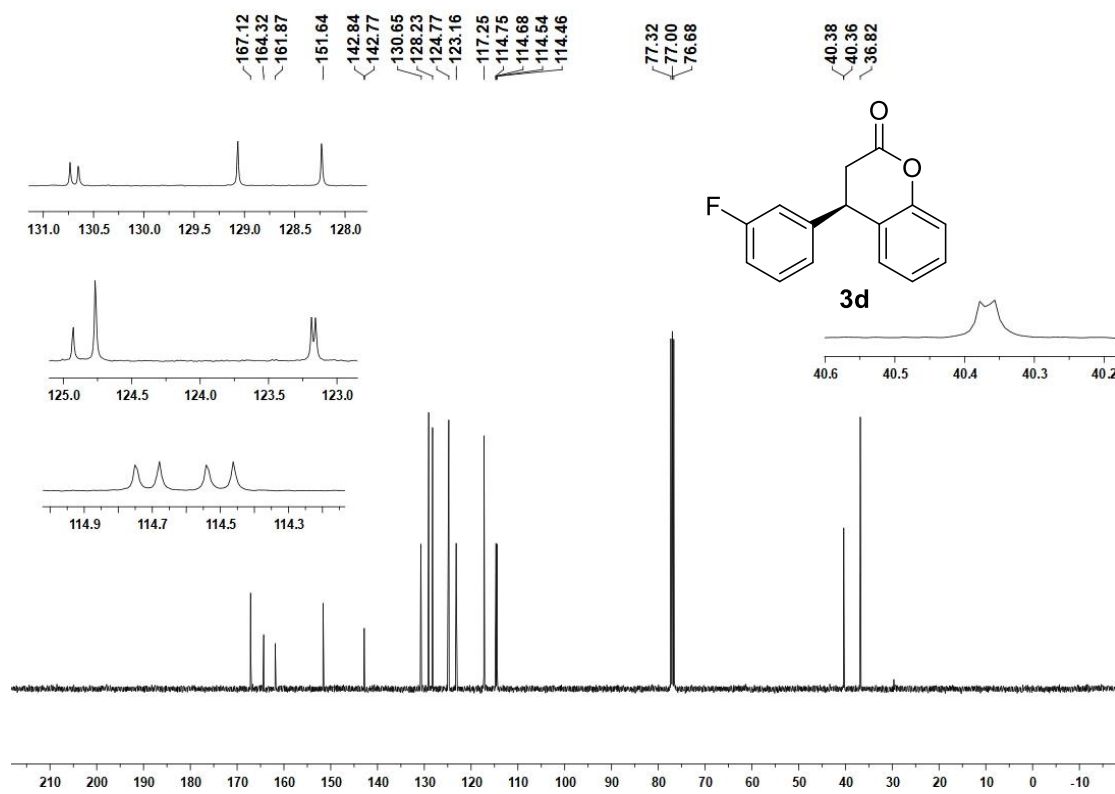

--111.73

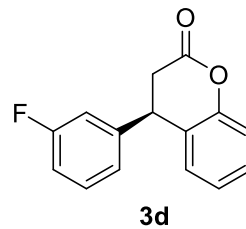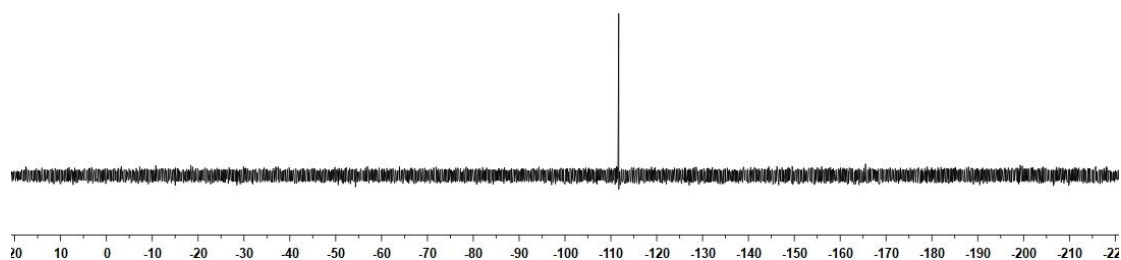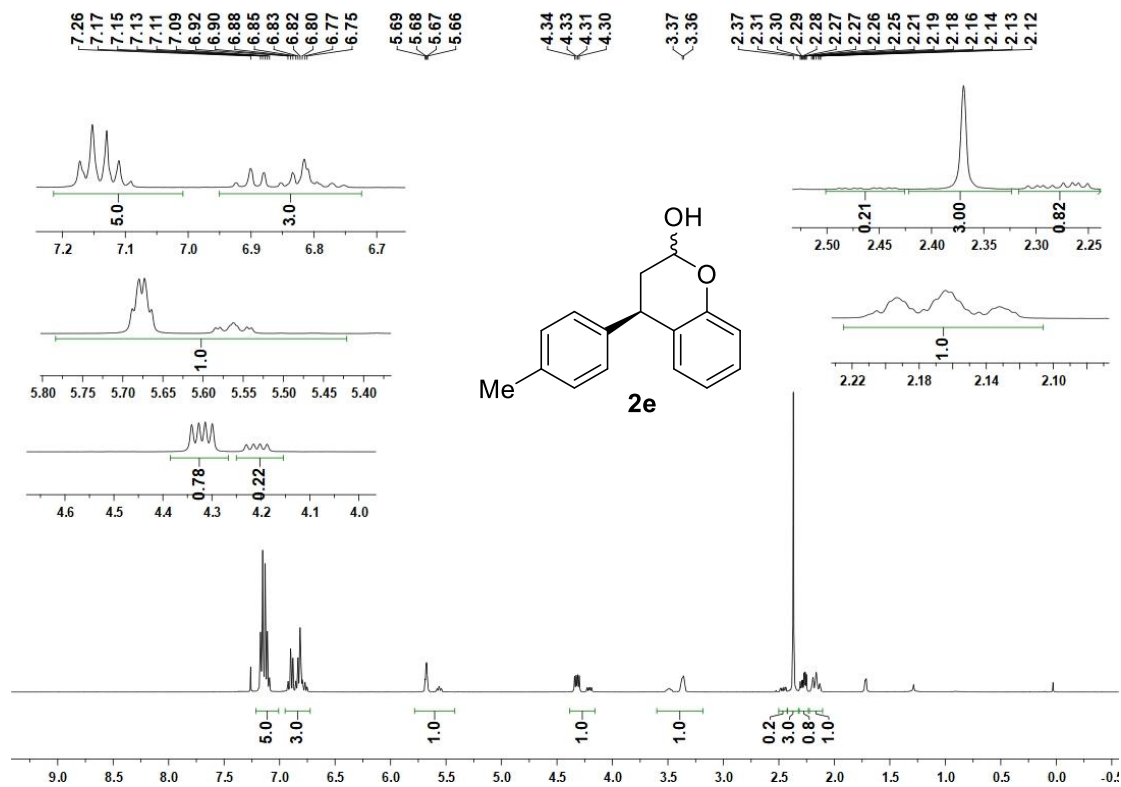

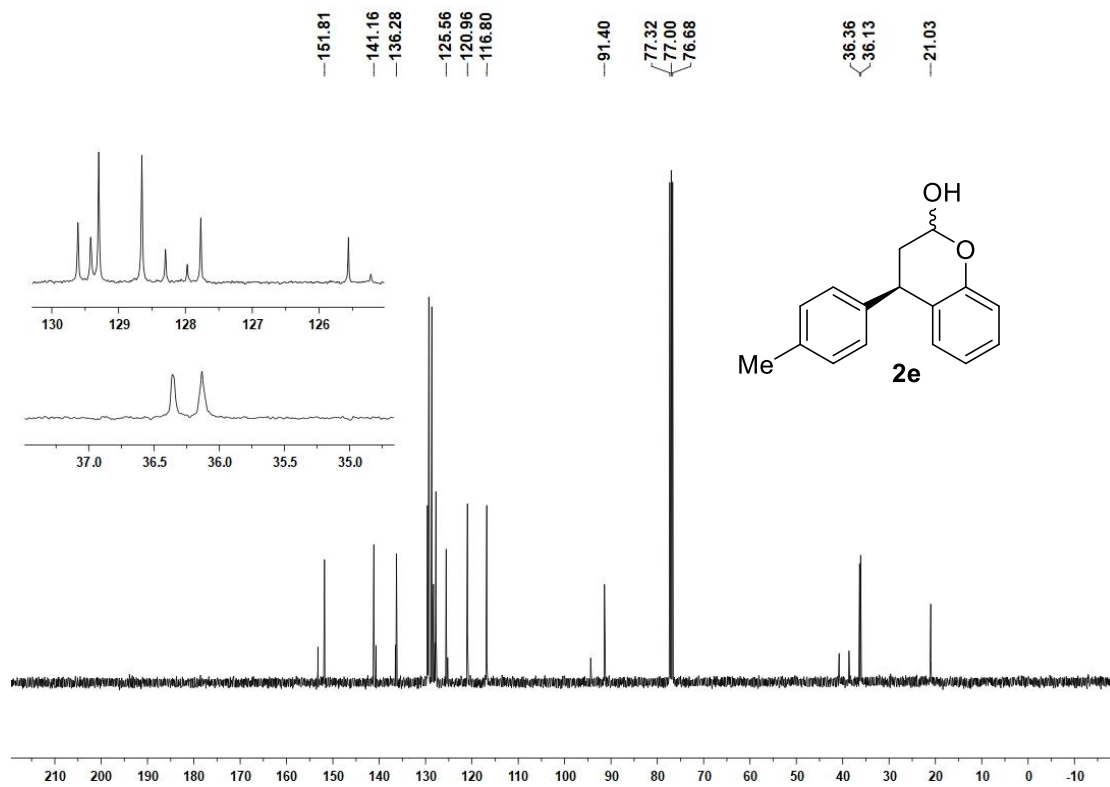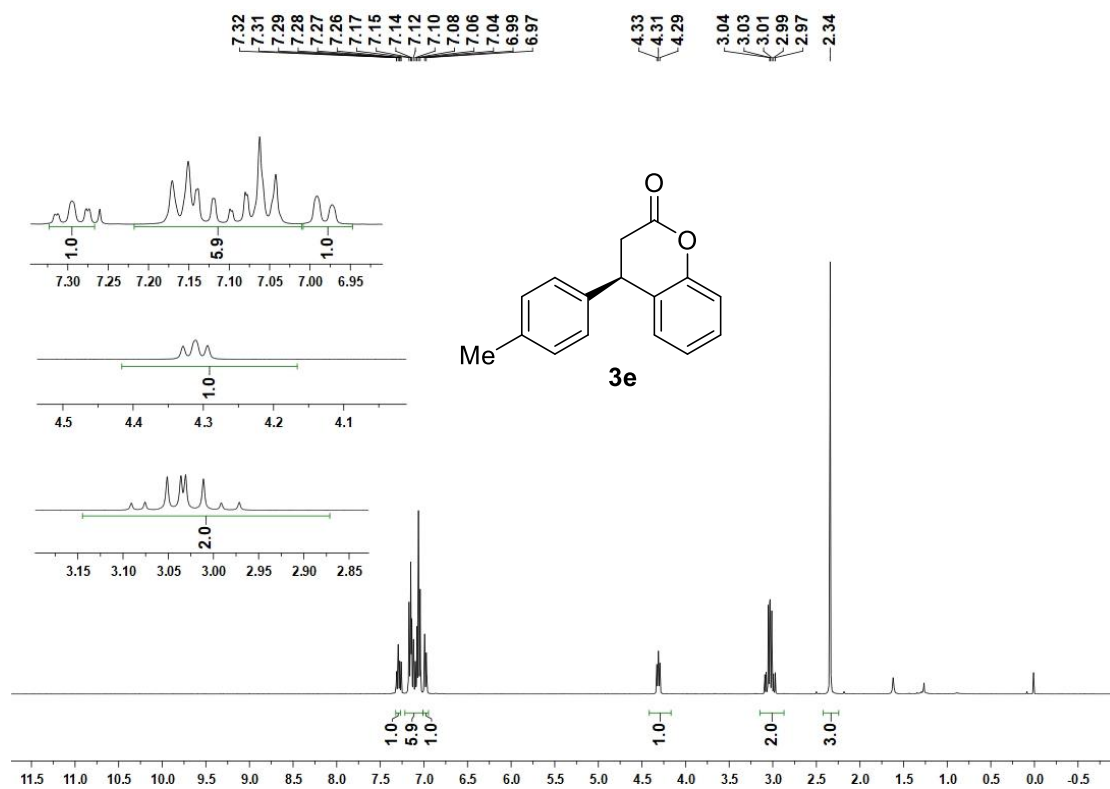



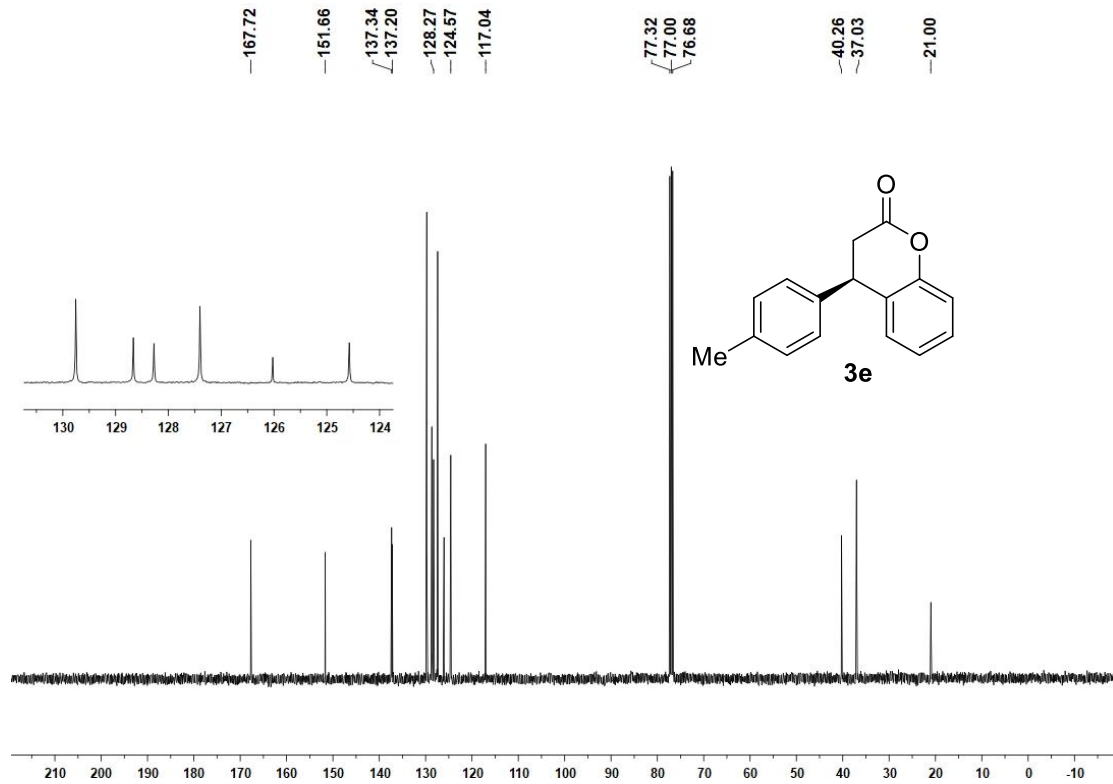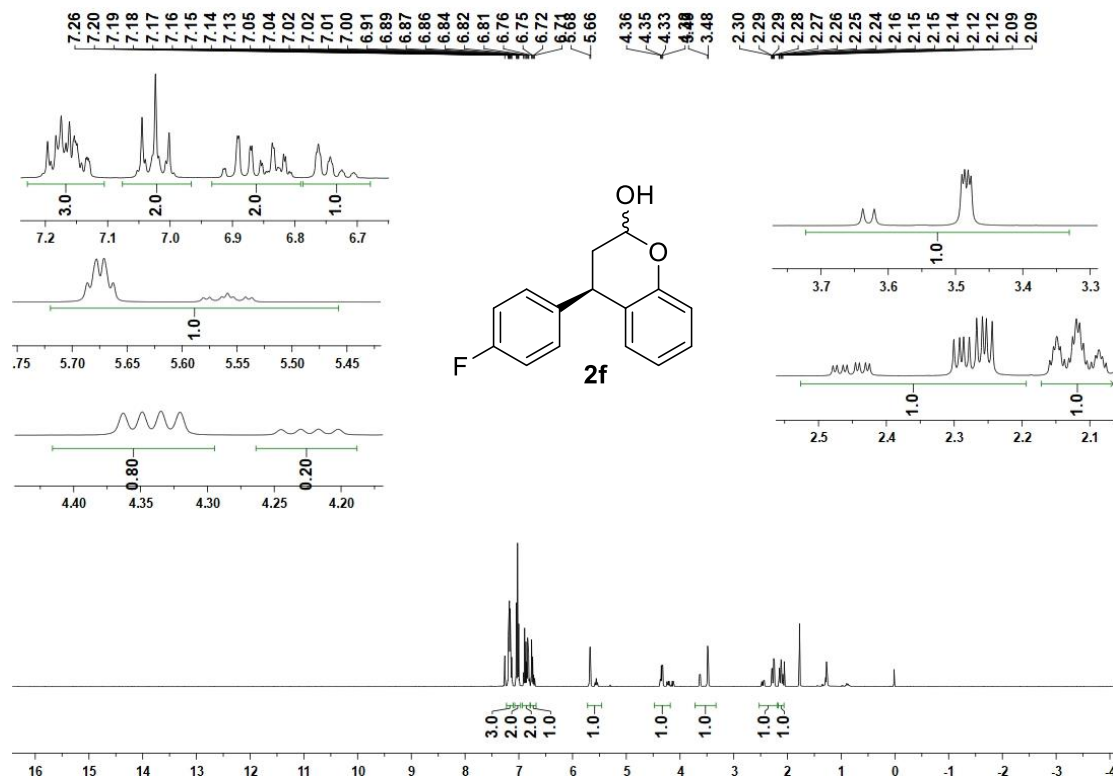

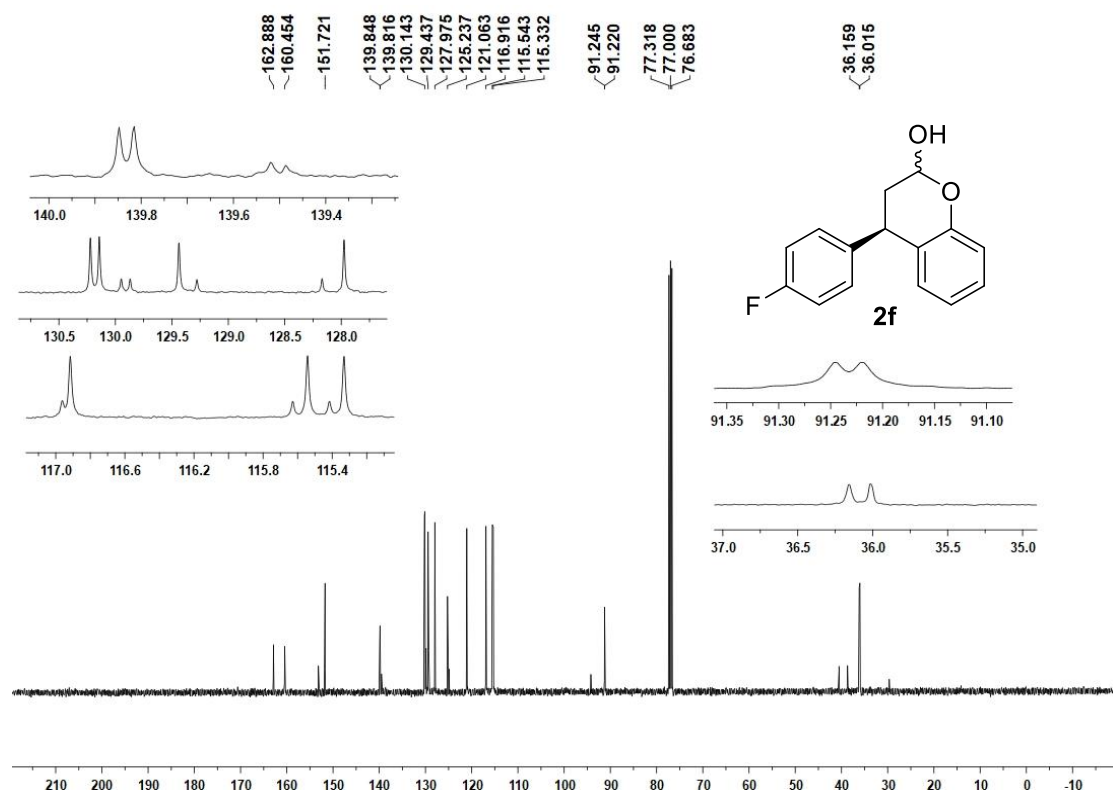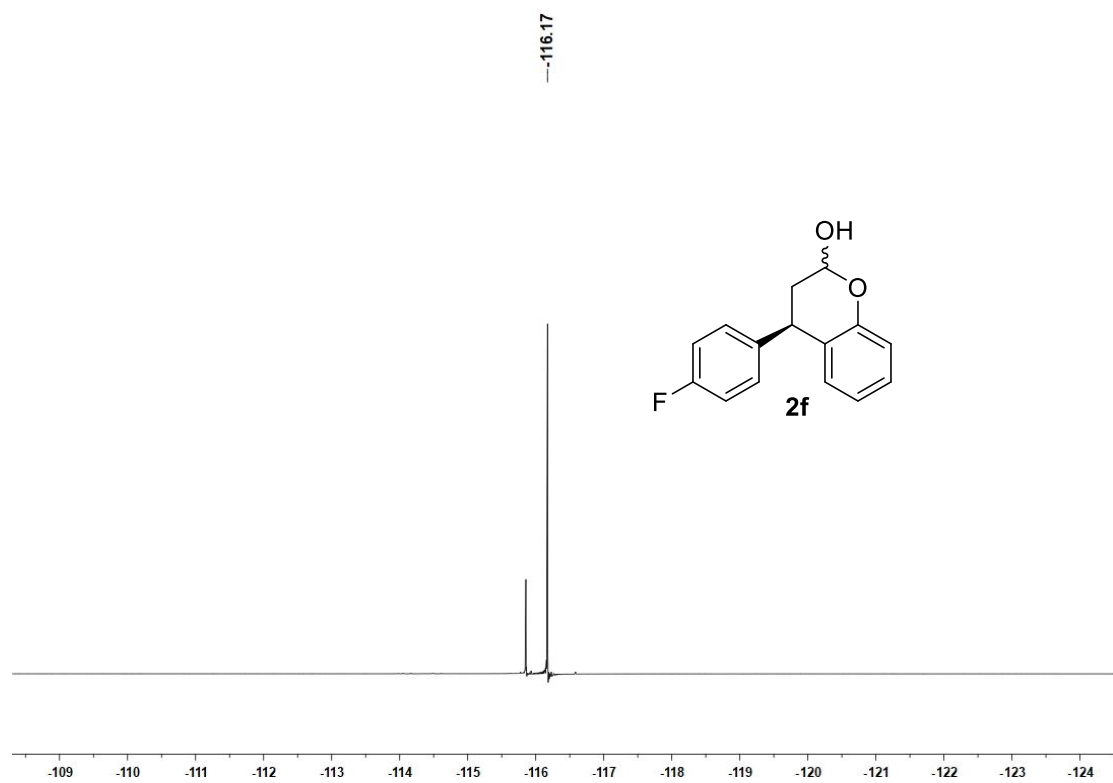

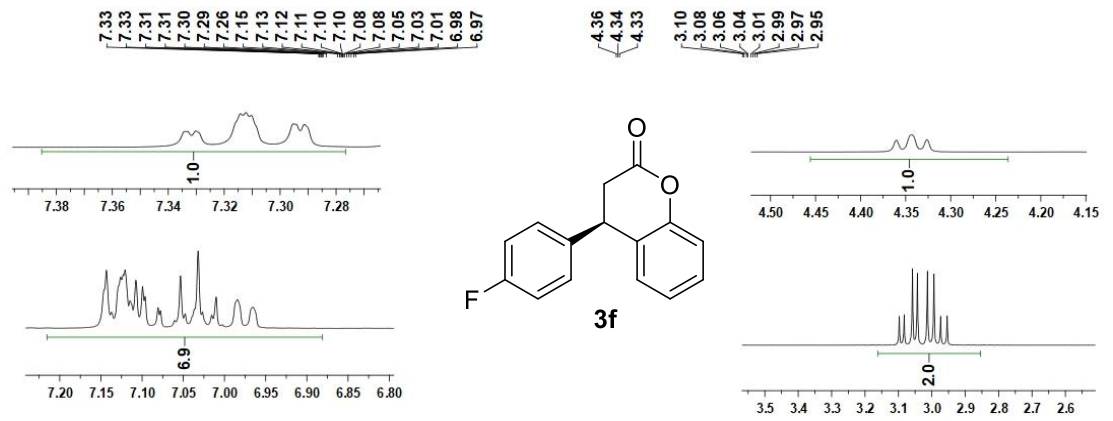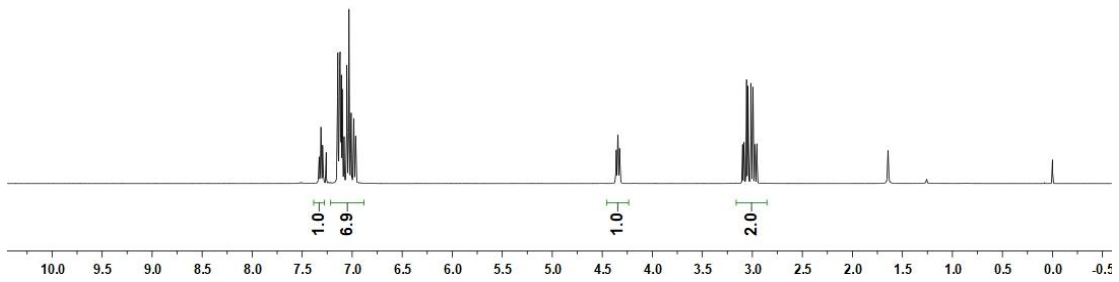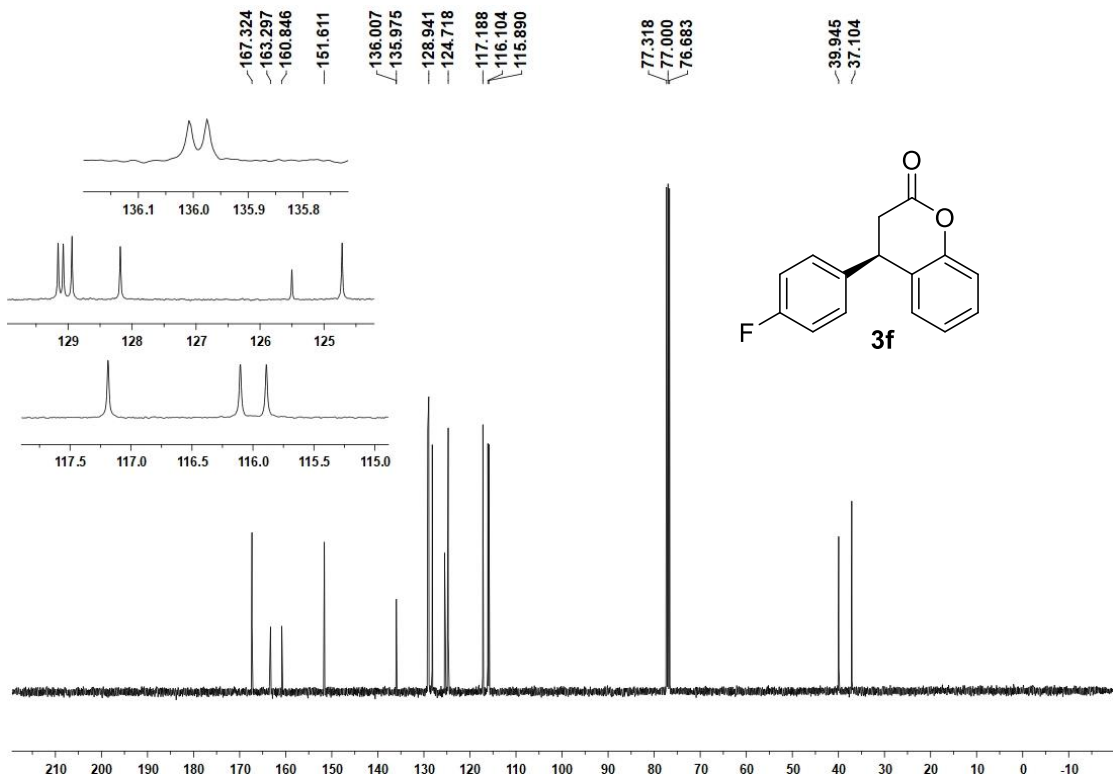

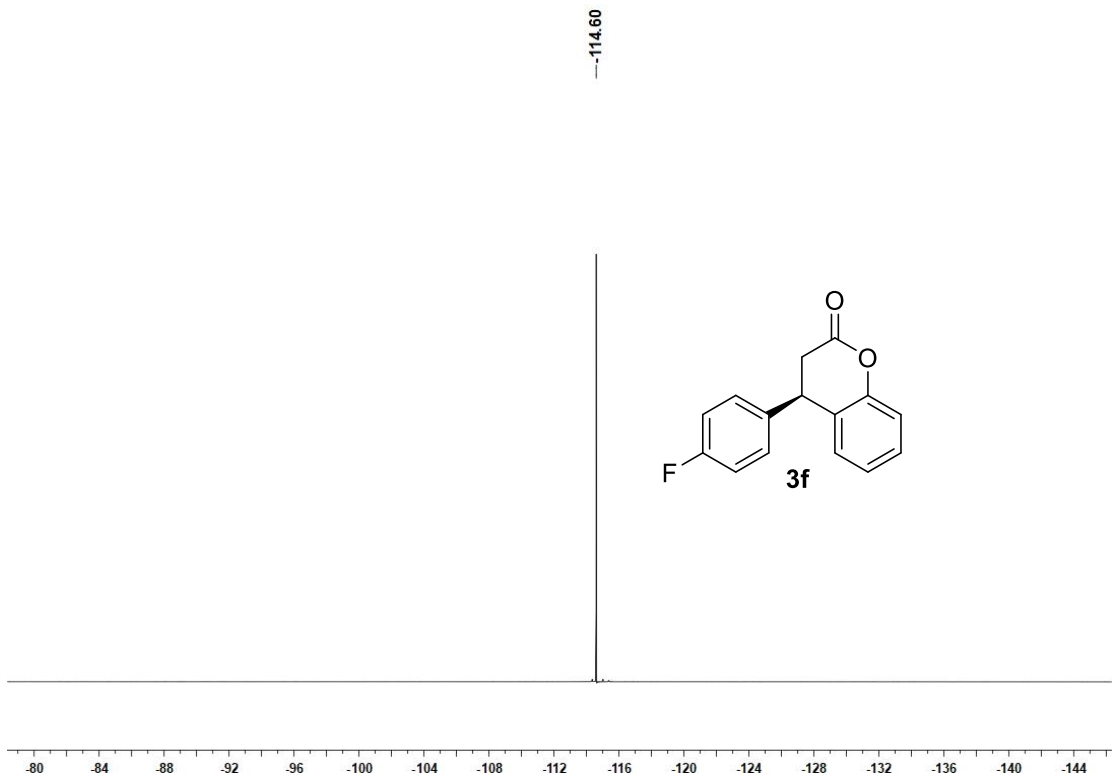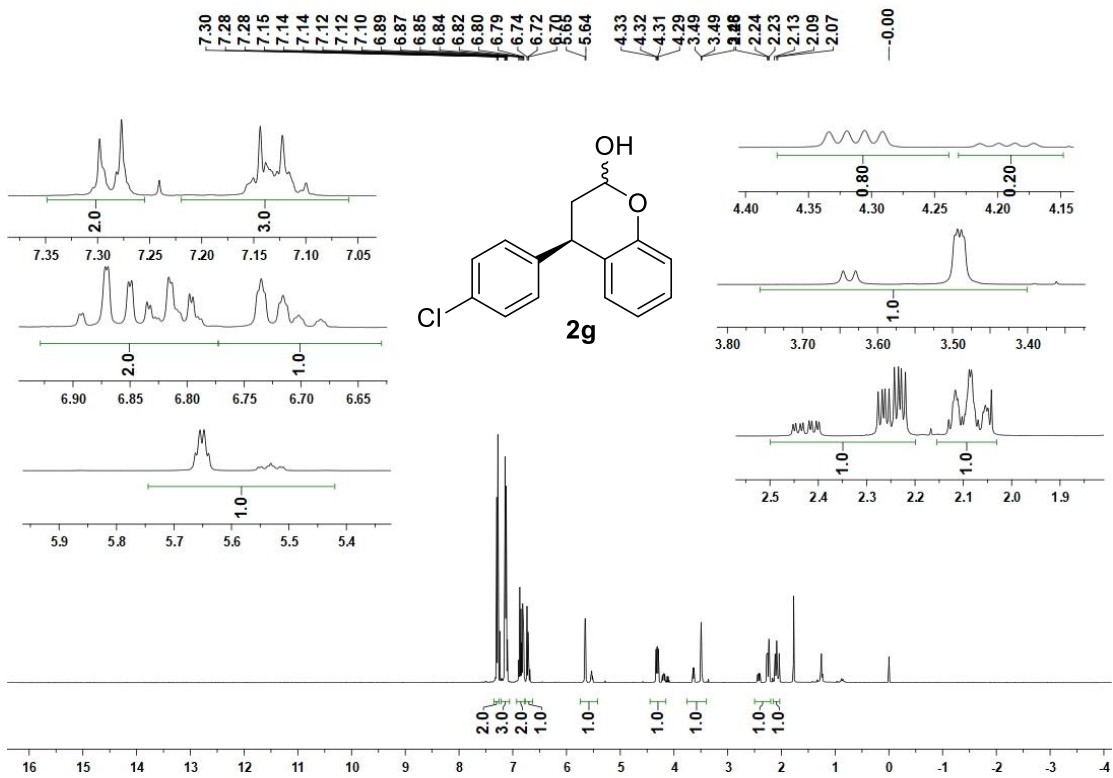

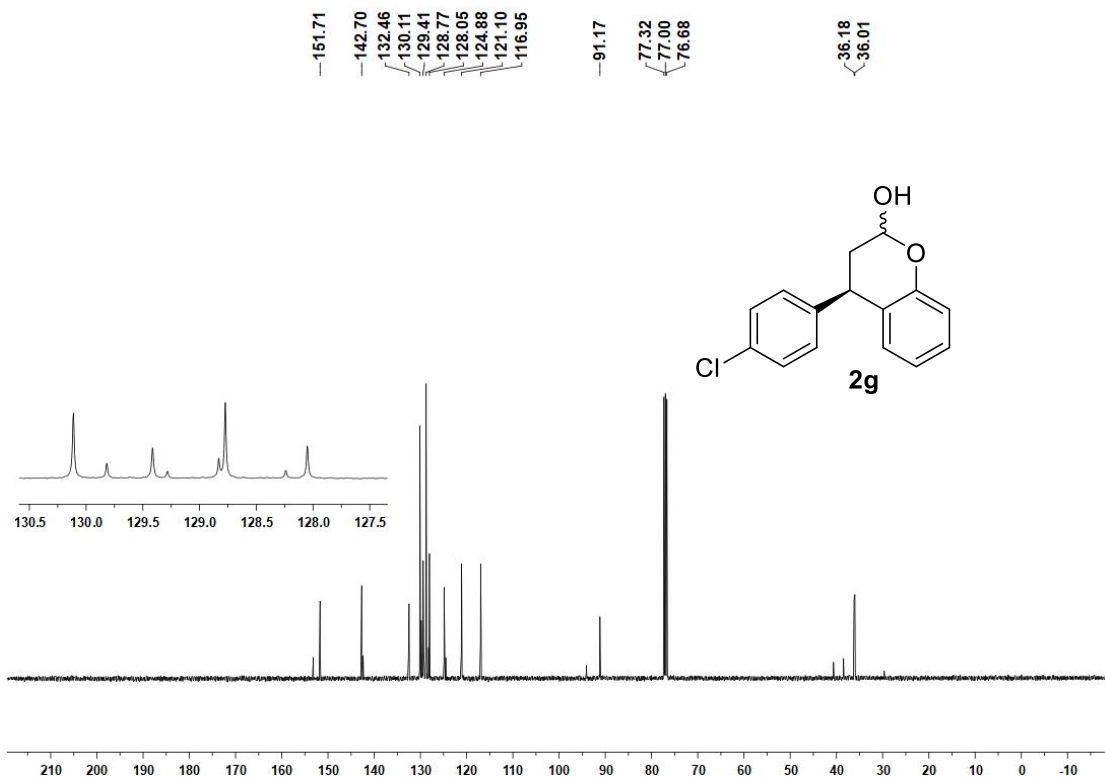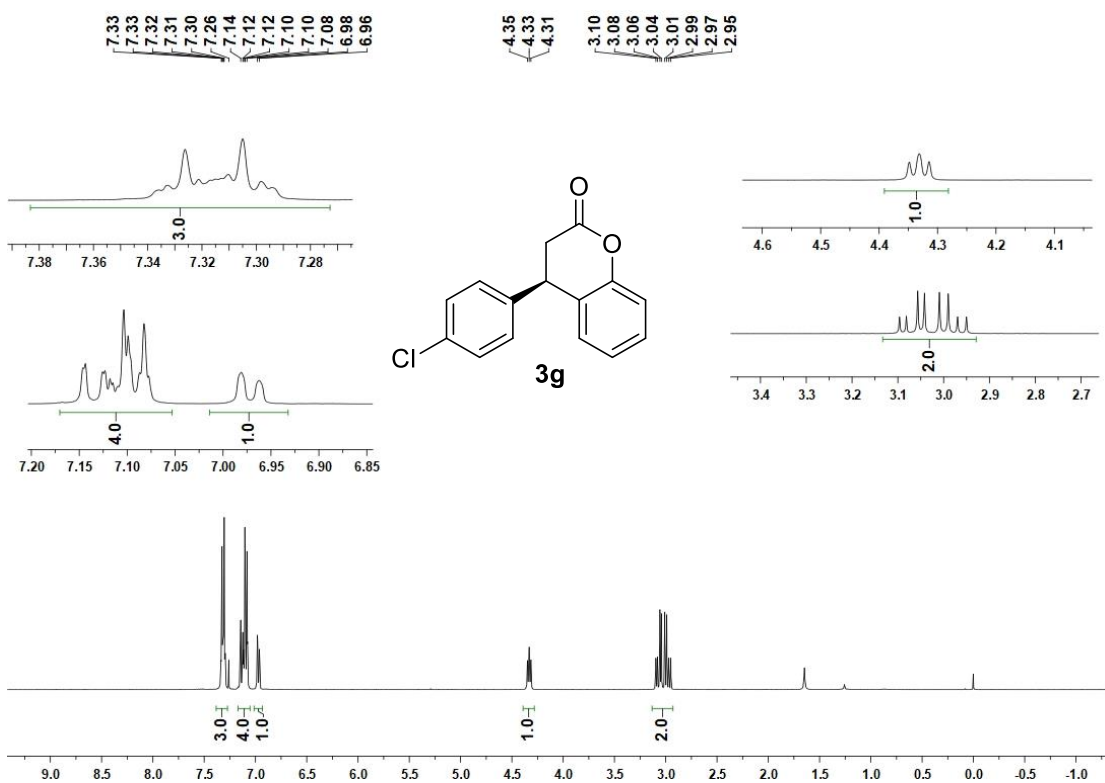

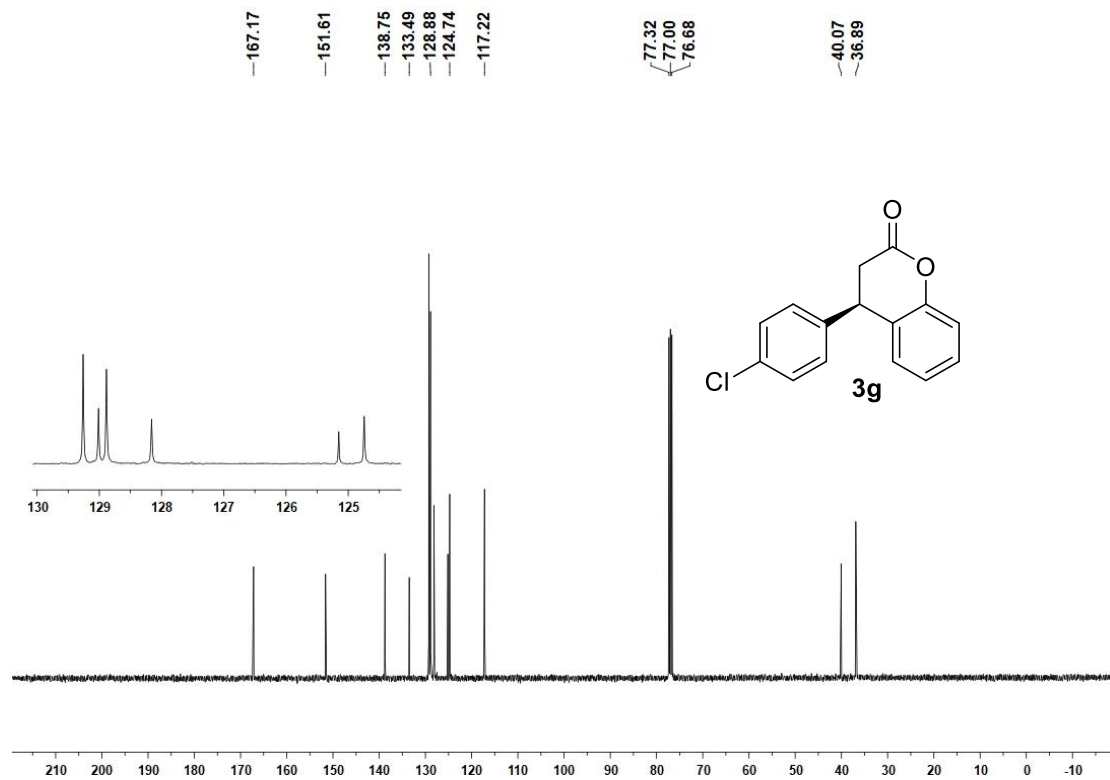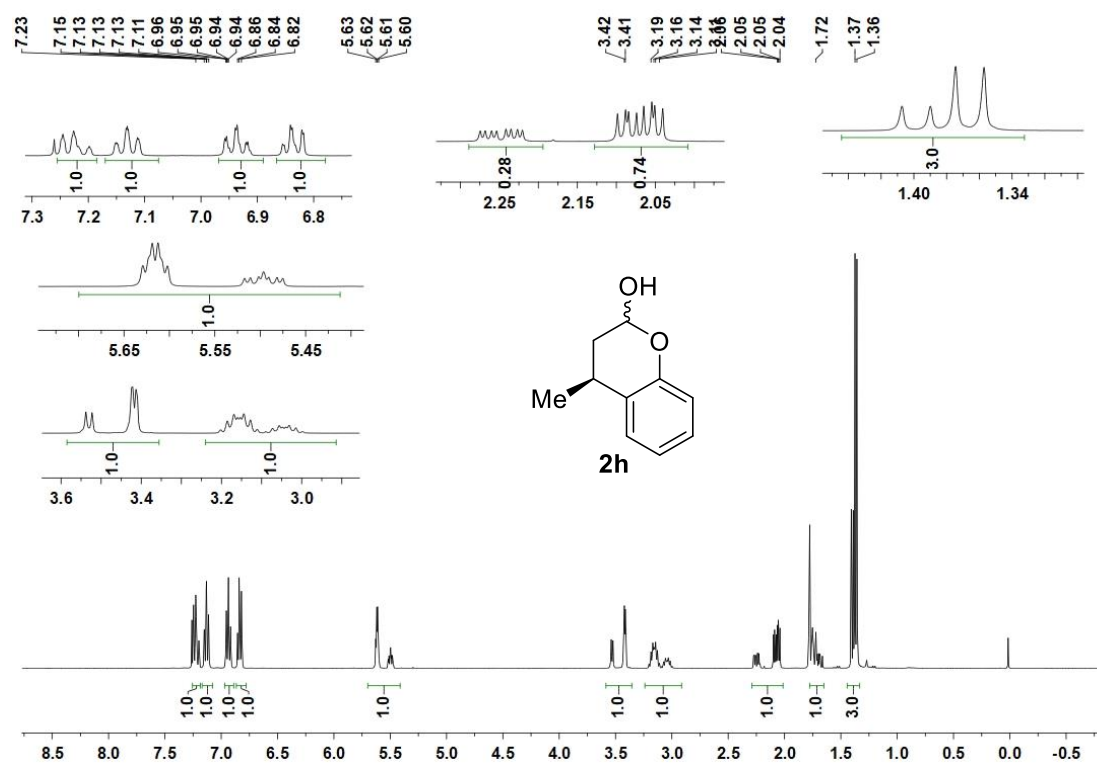

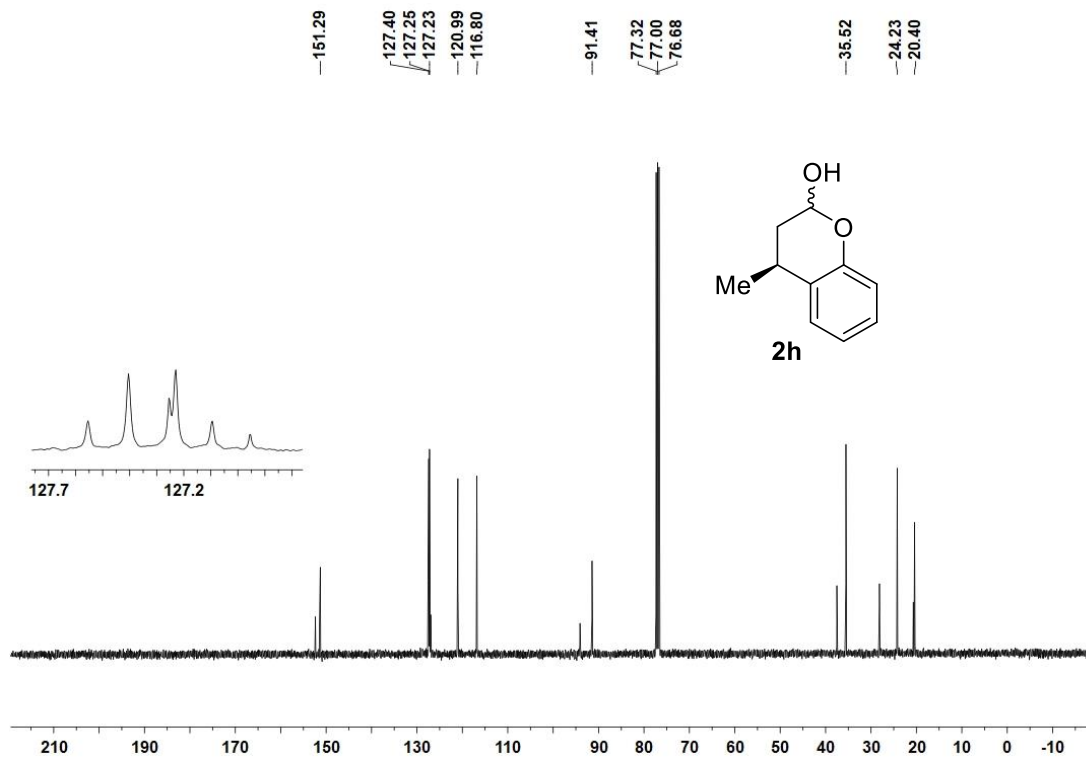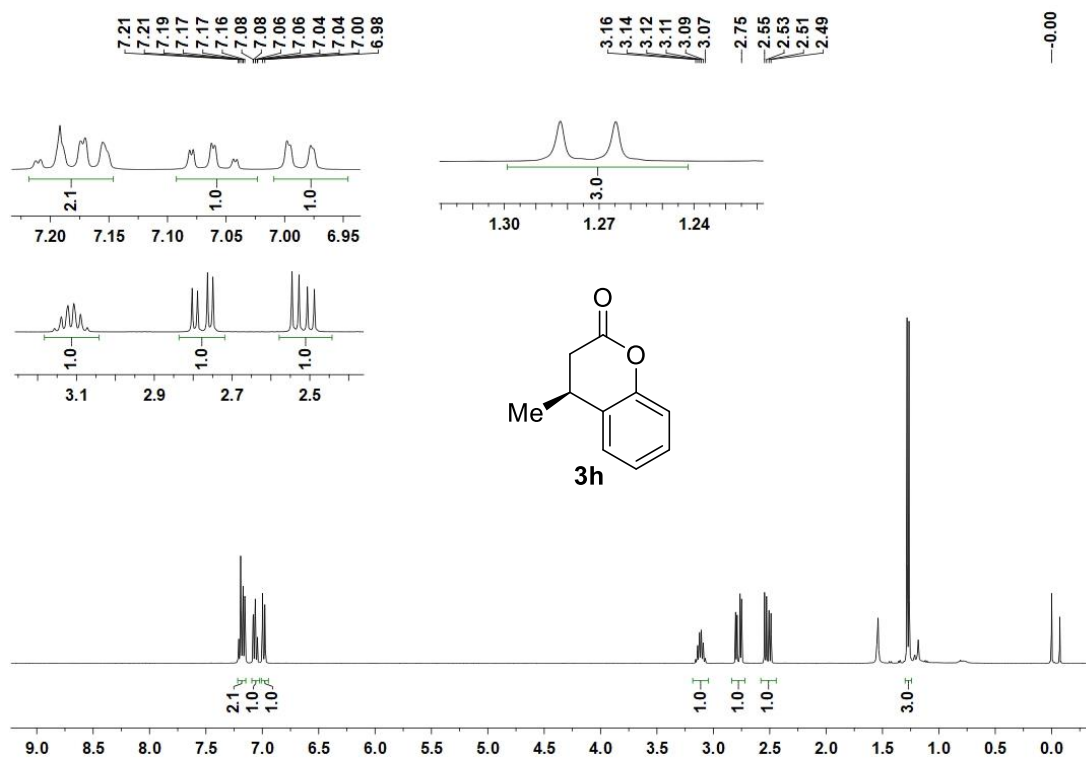

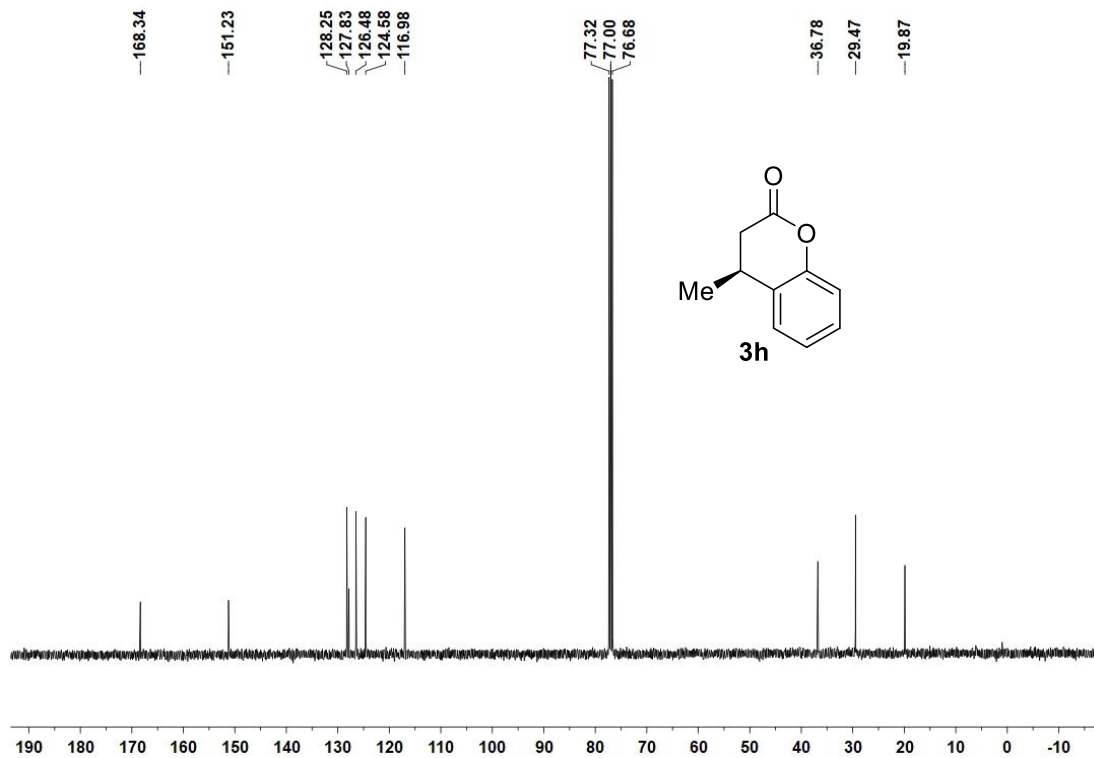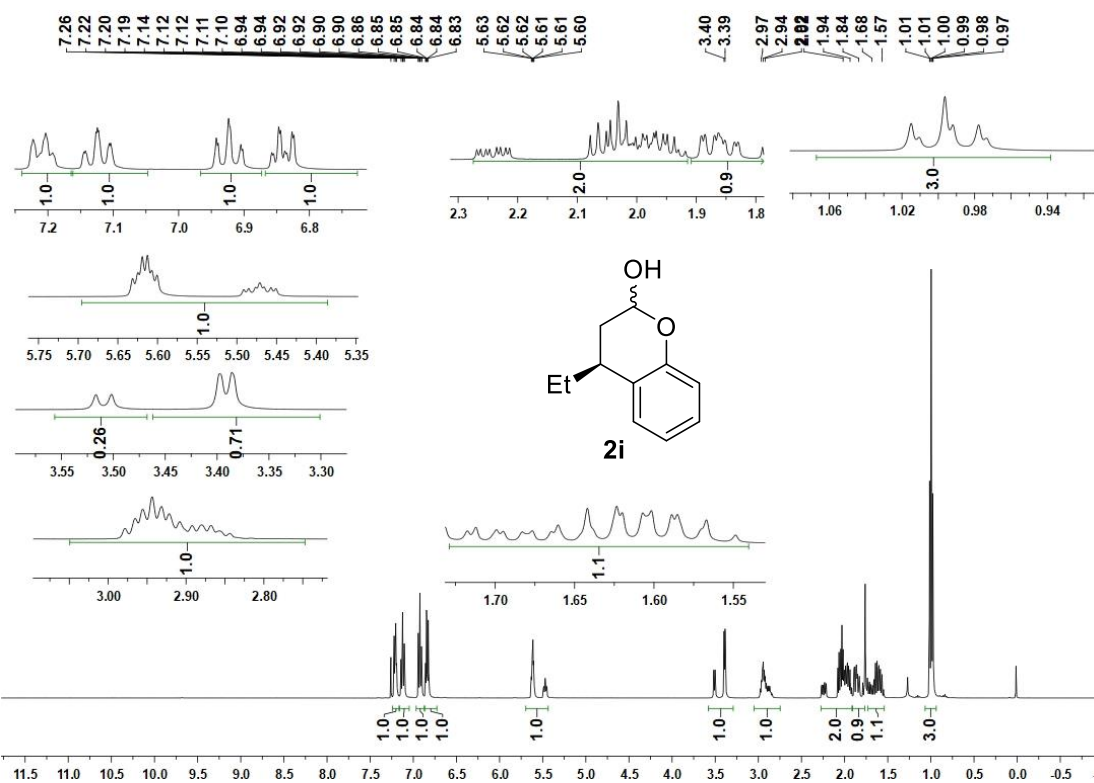



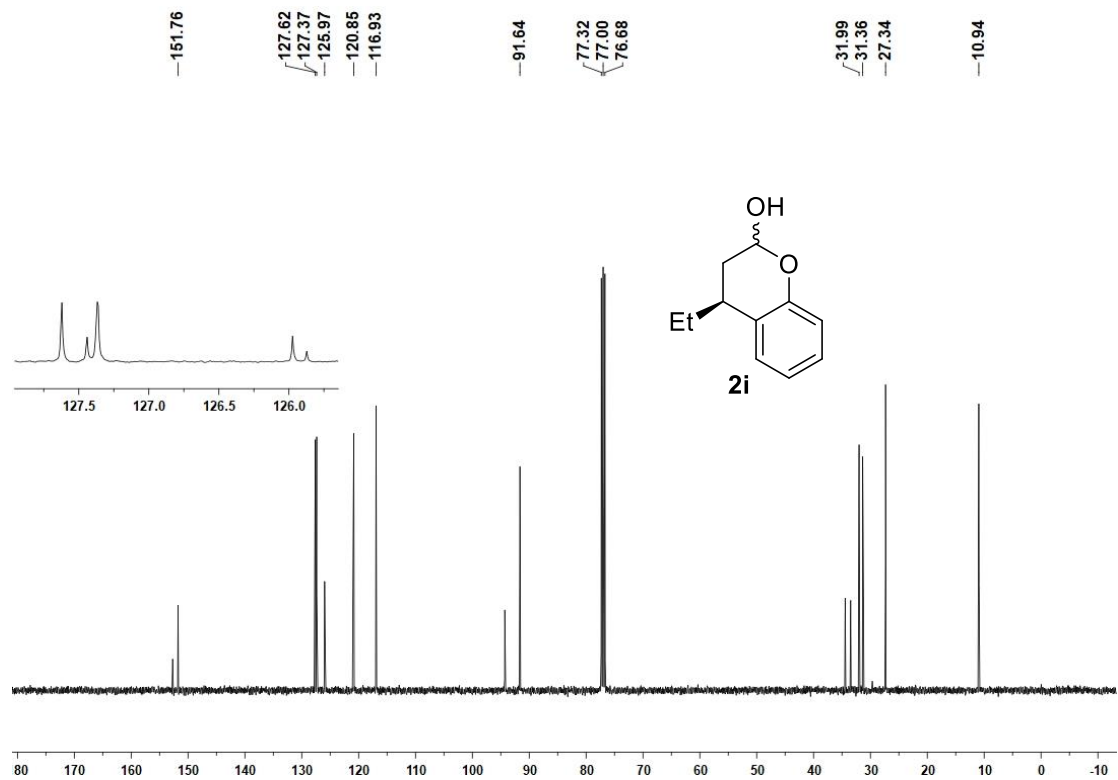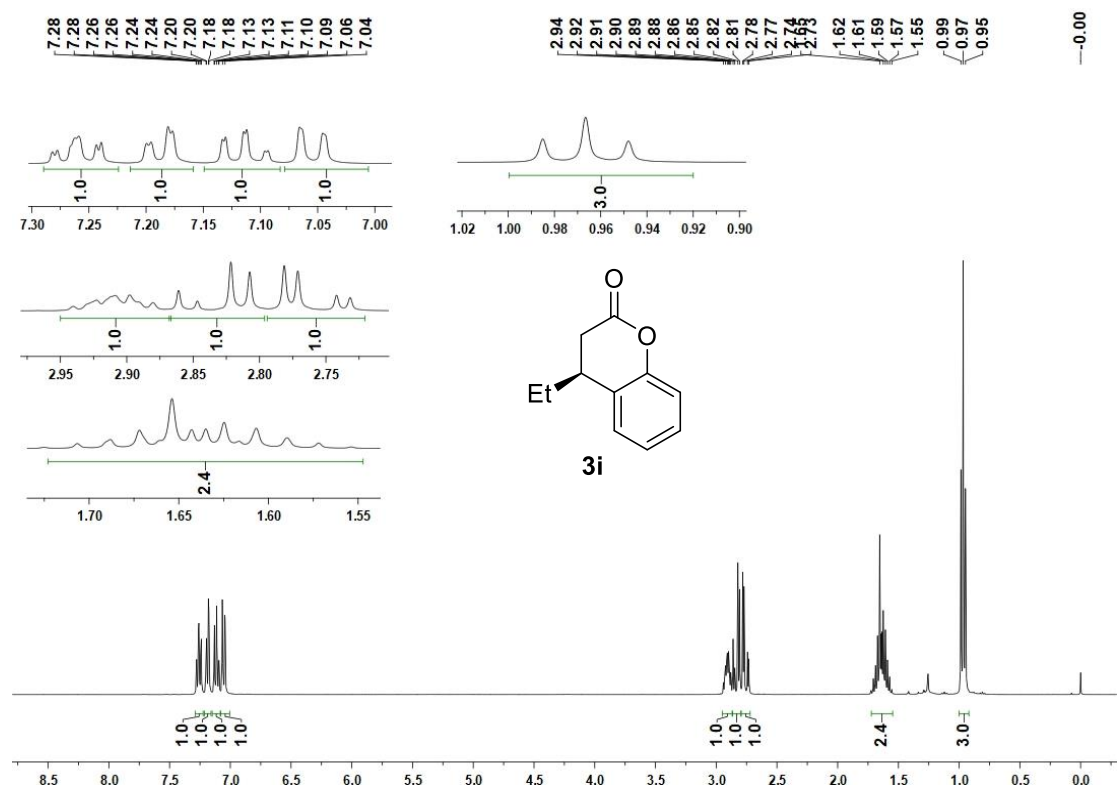

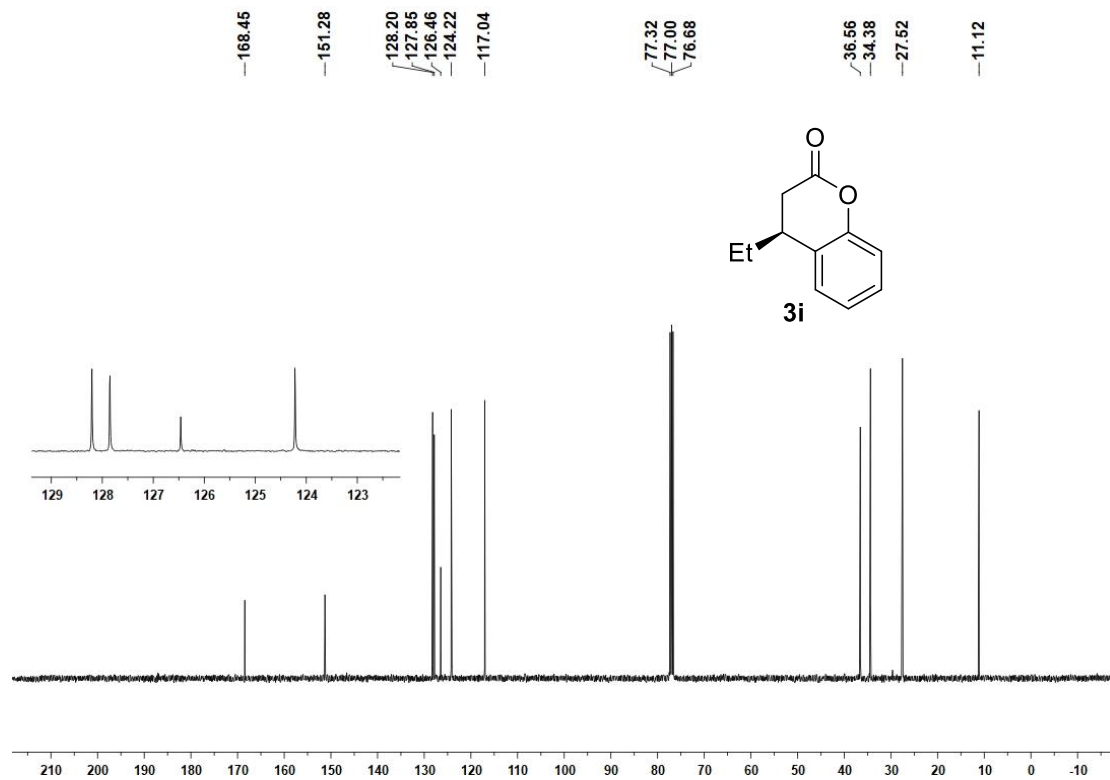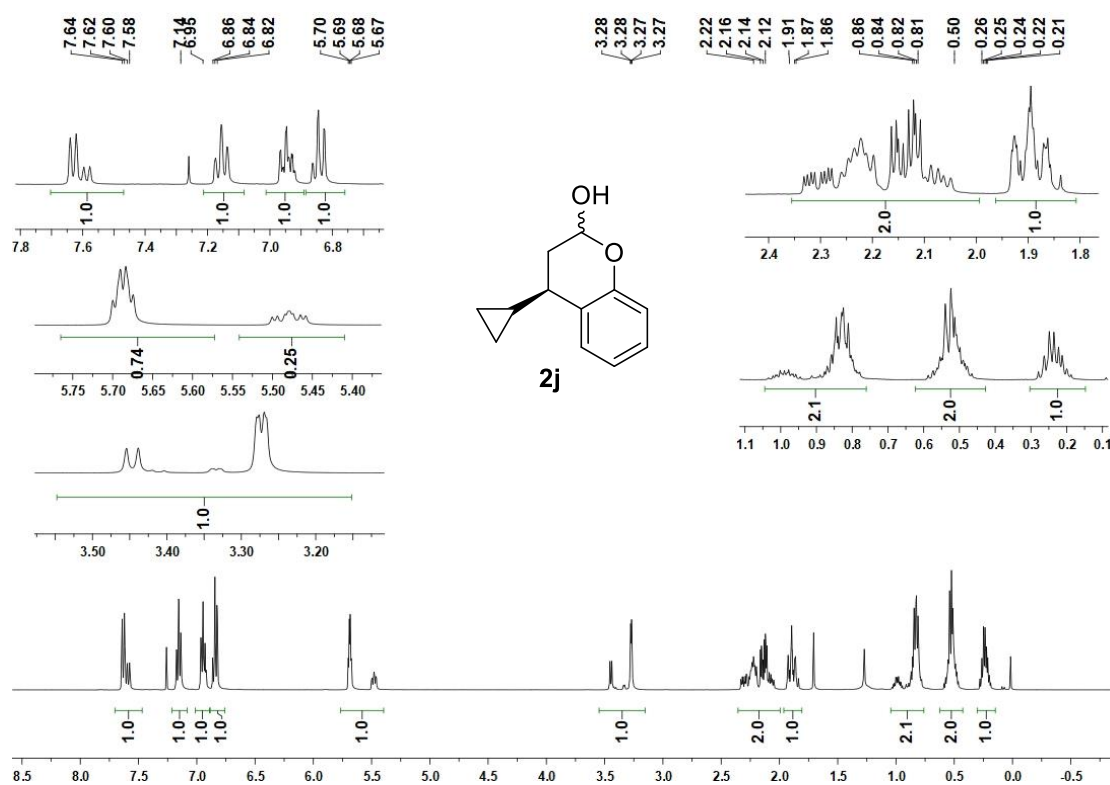

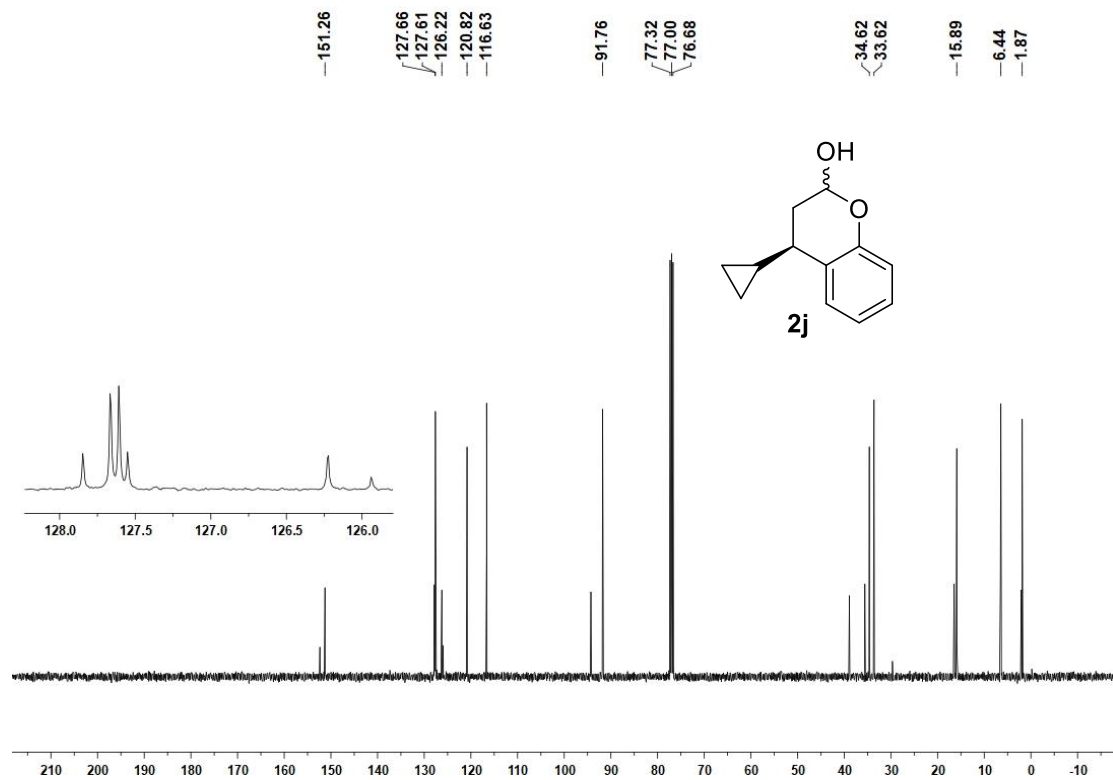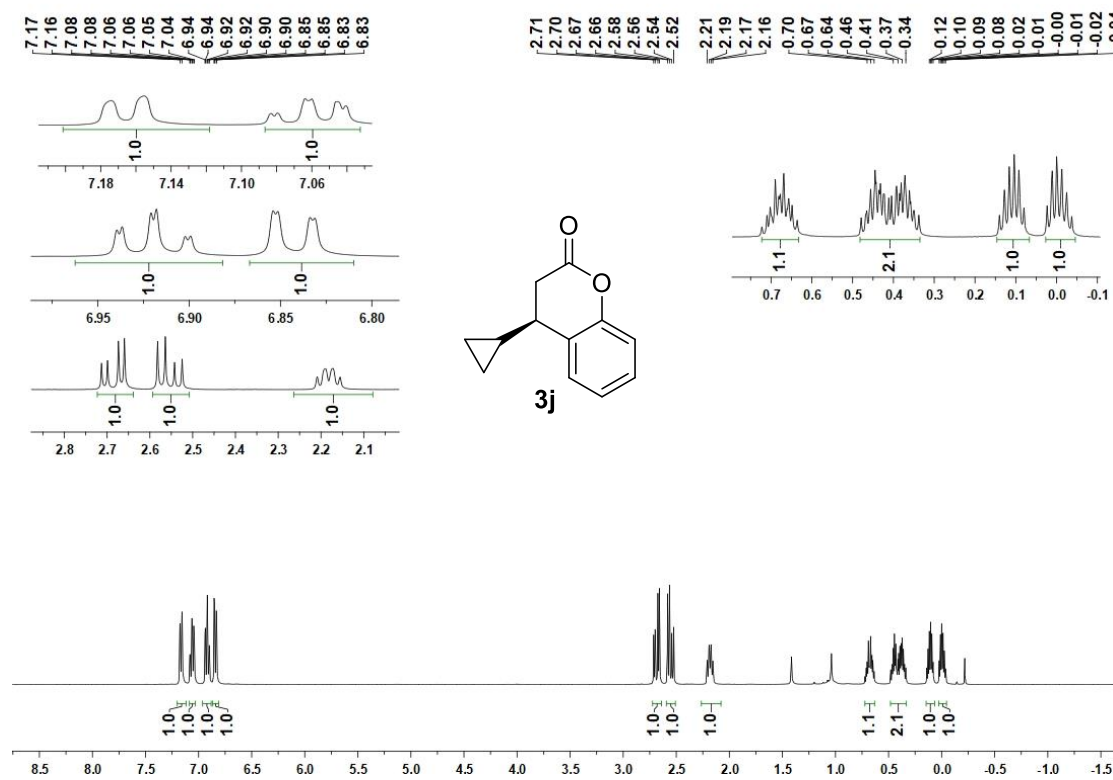

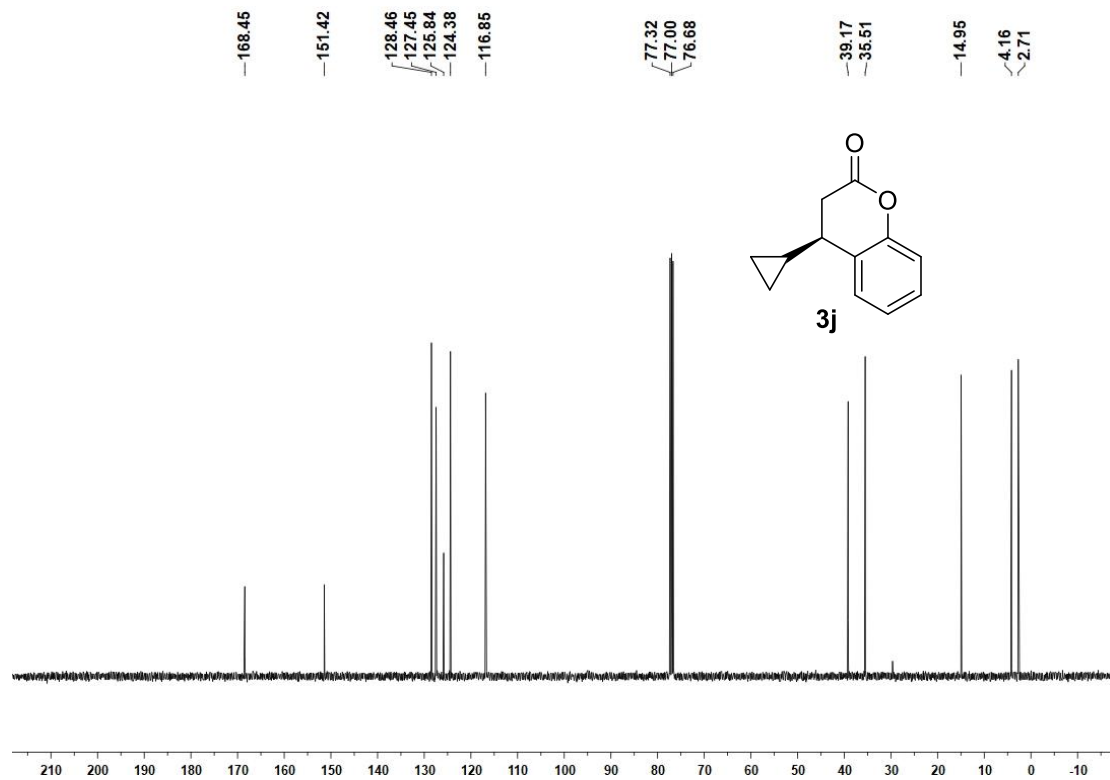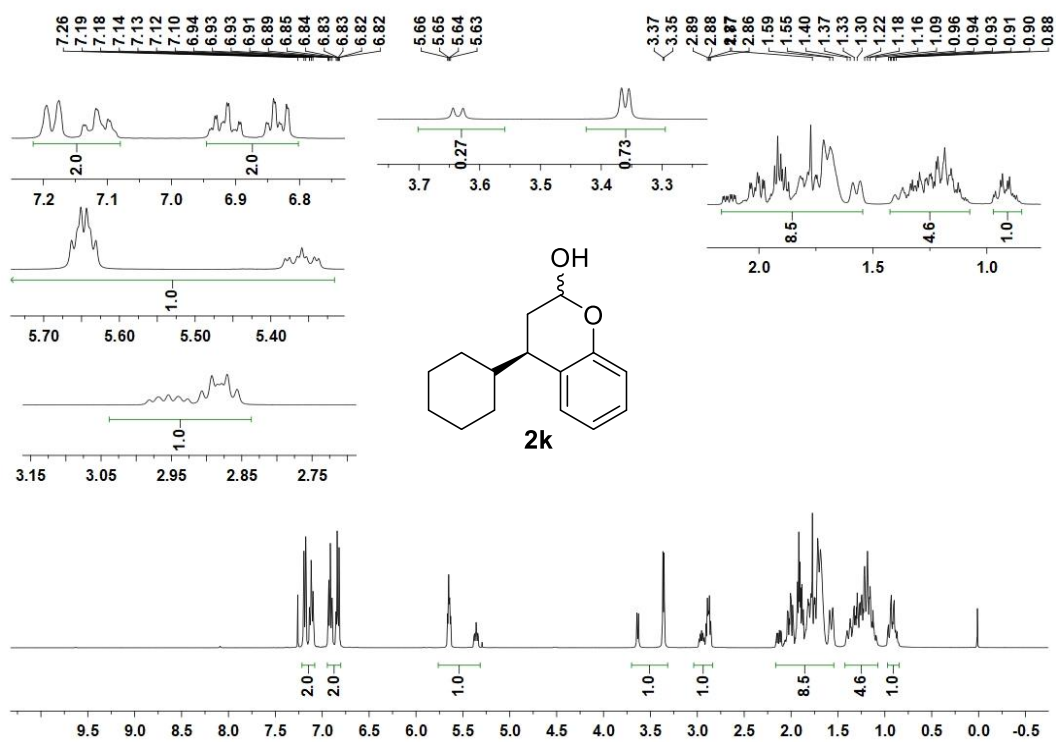

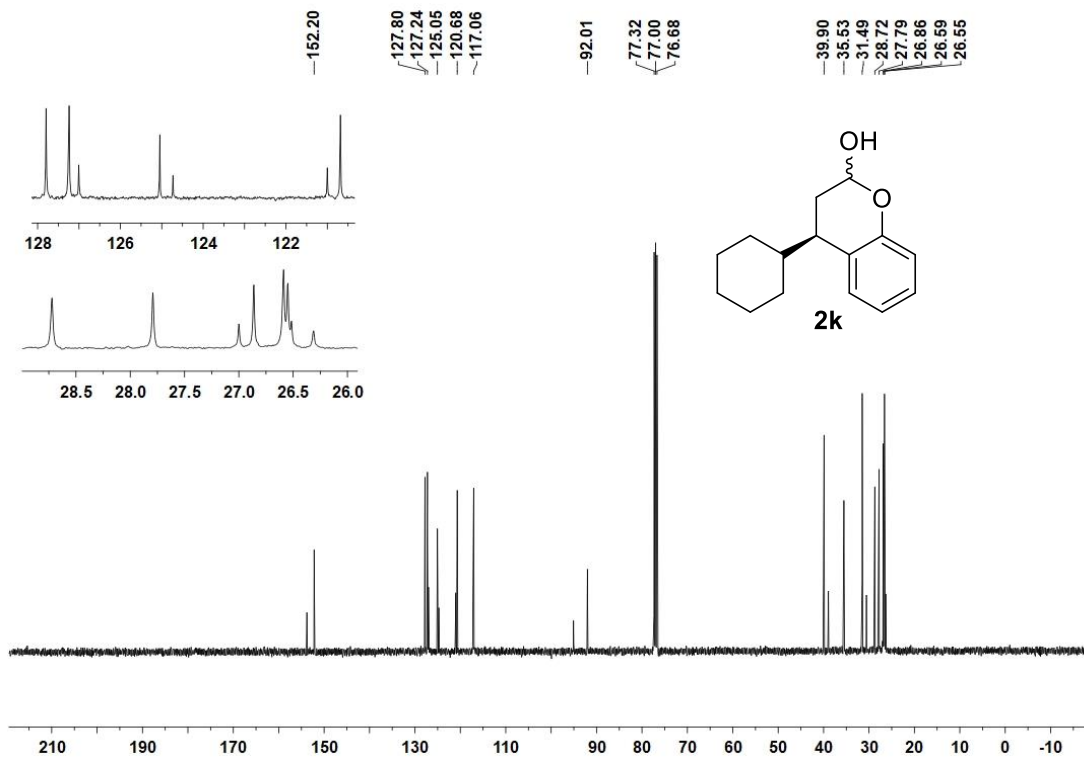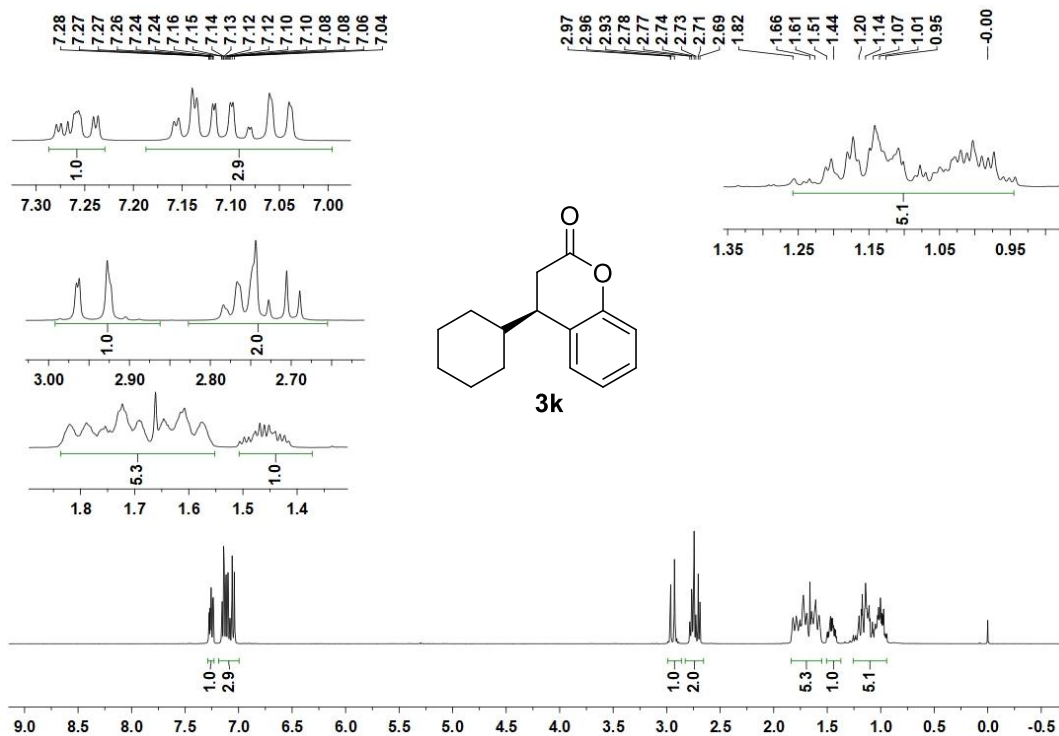

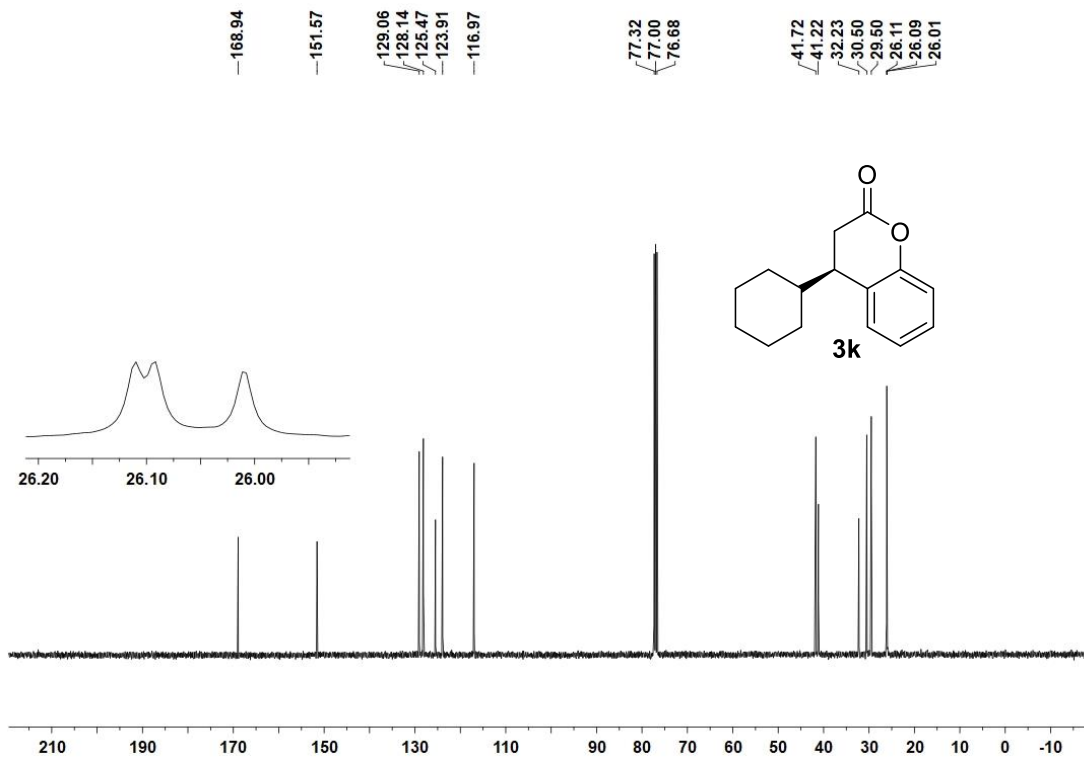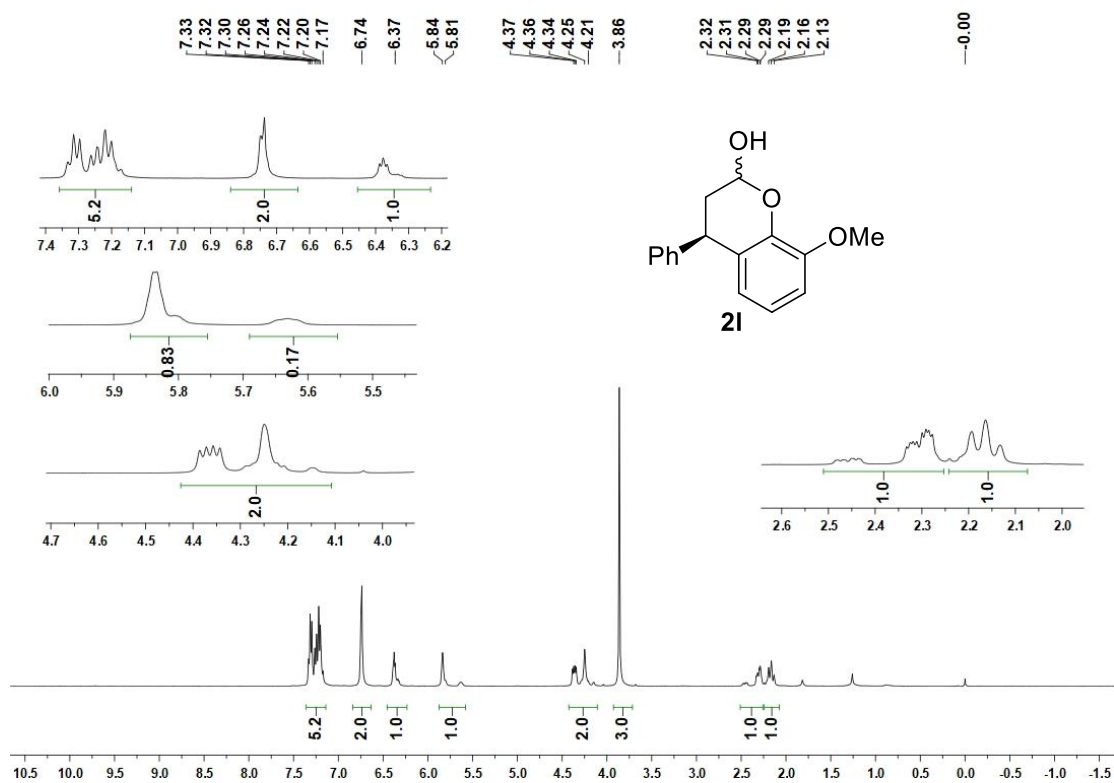

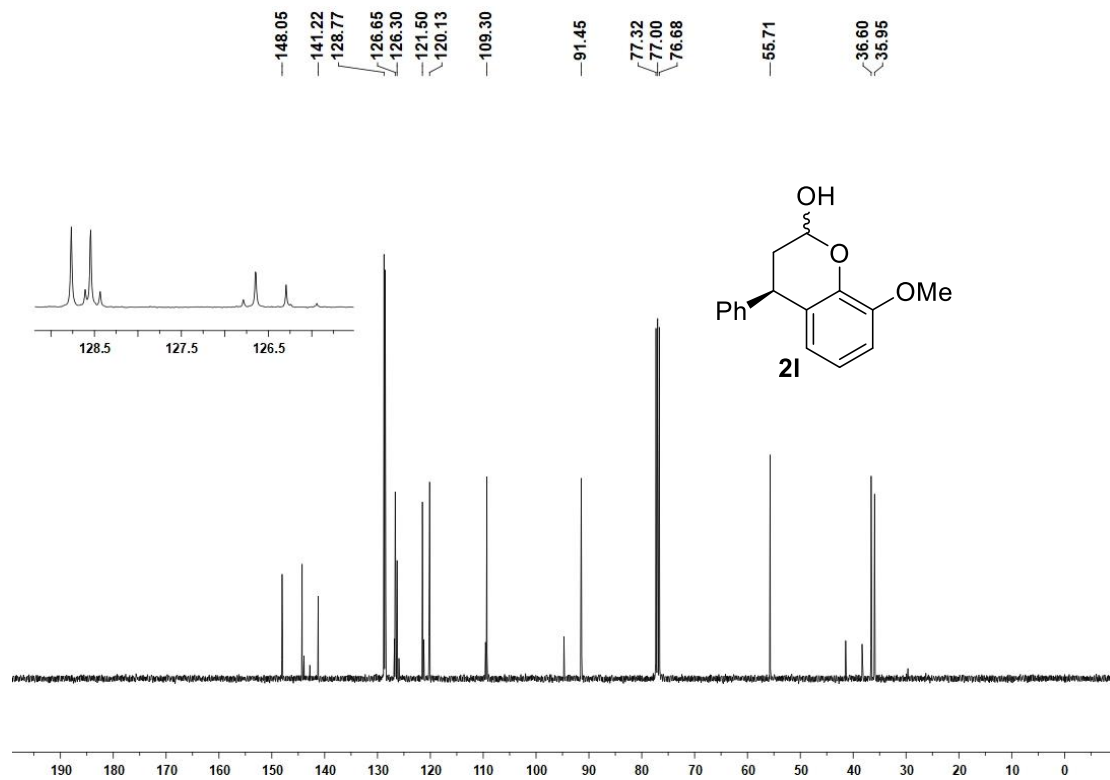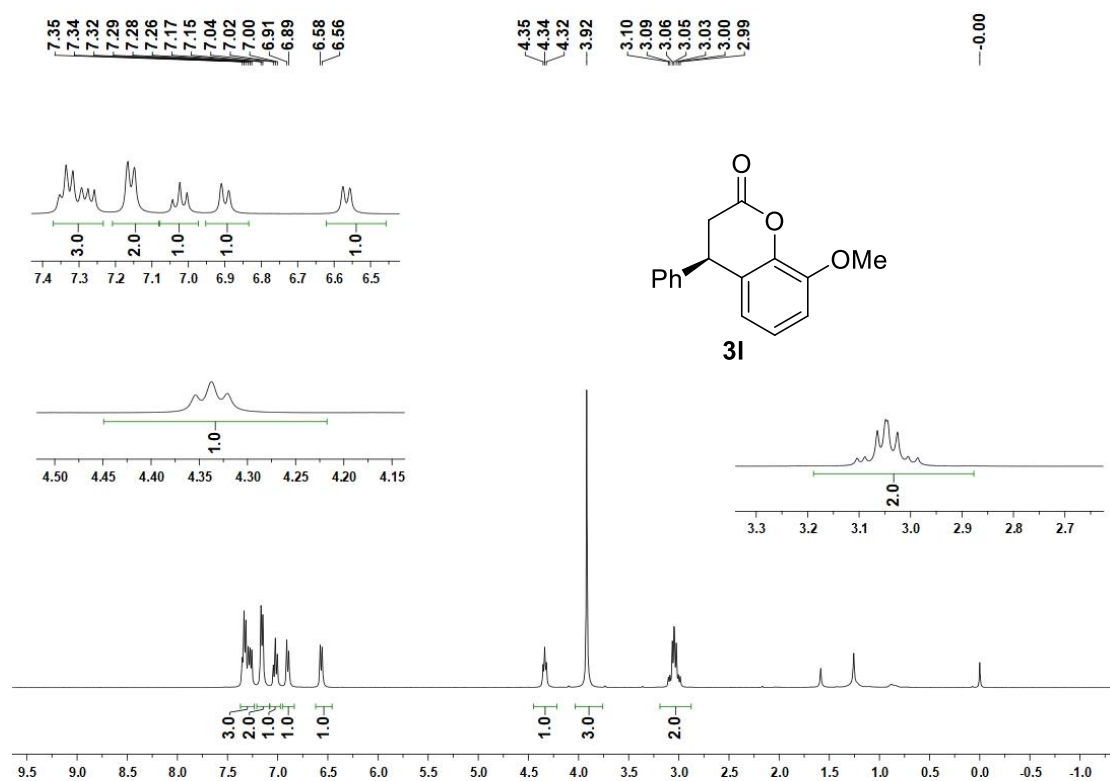

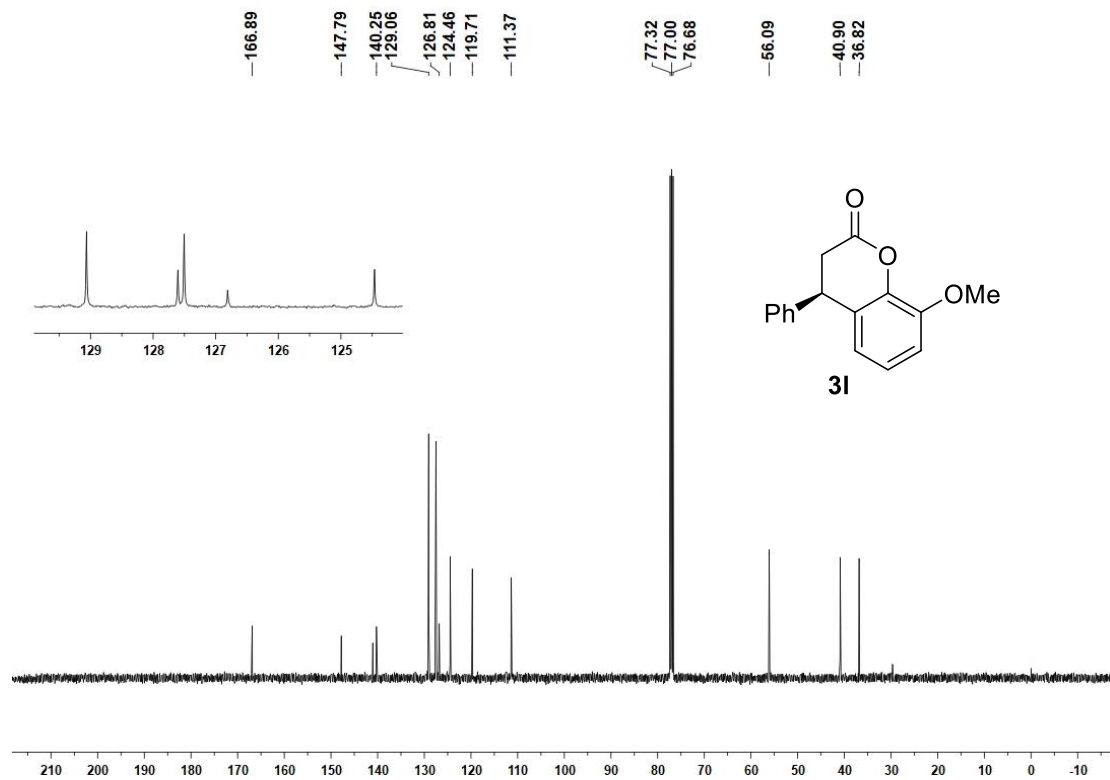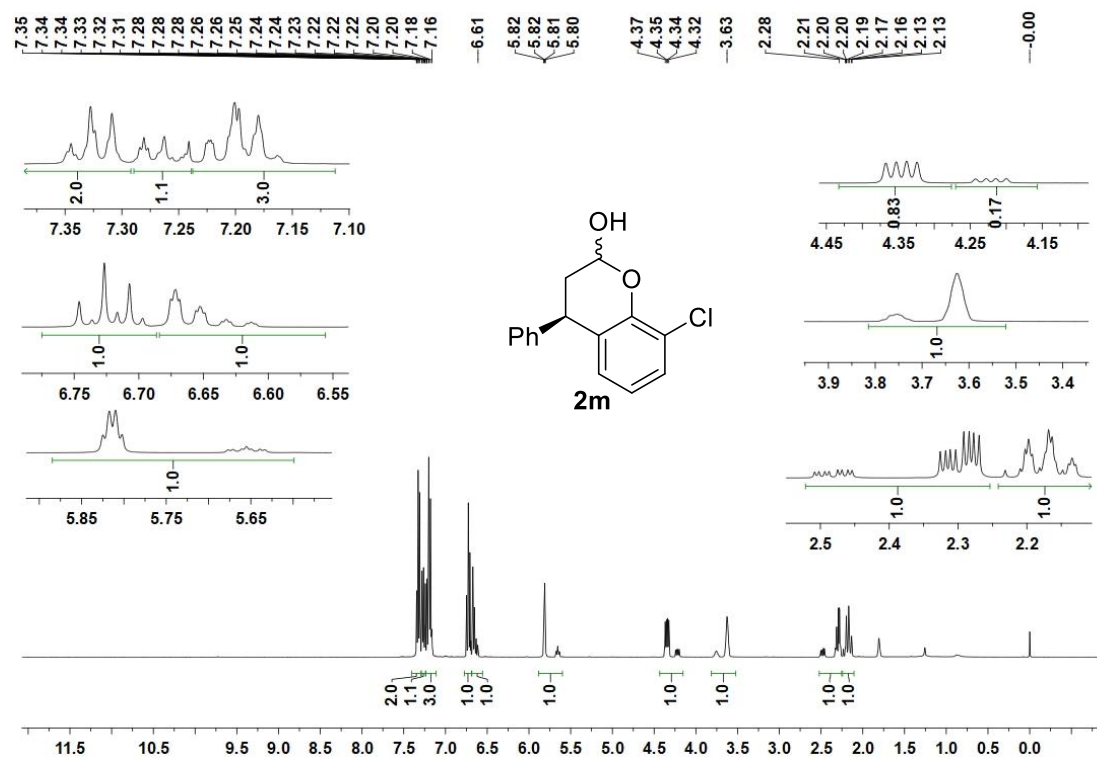



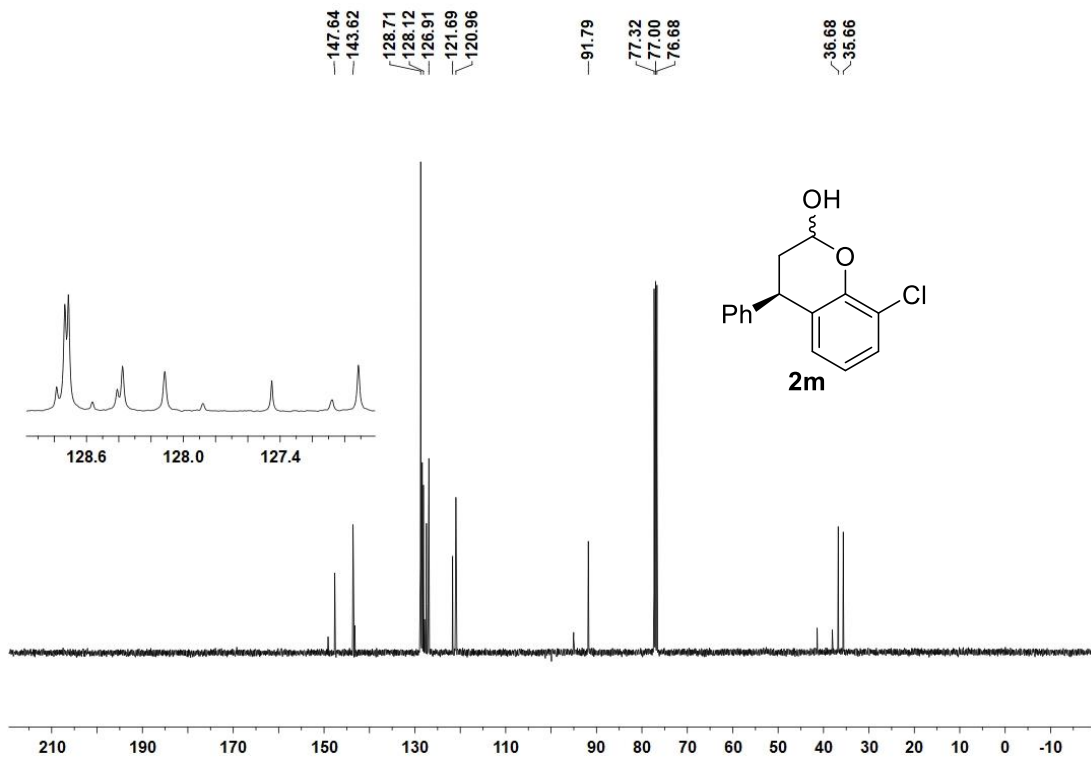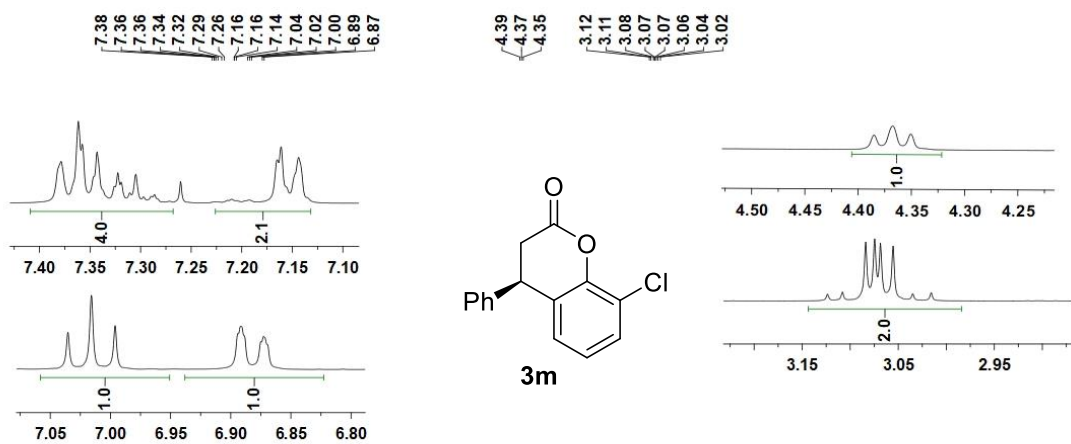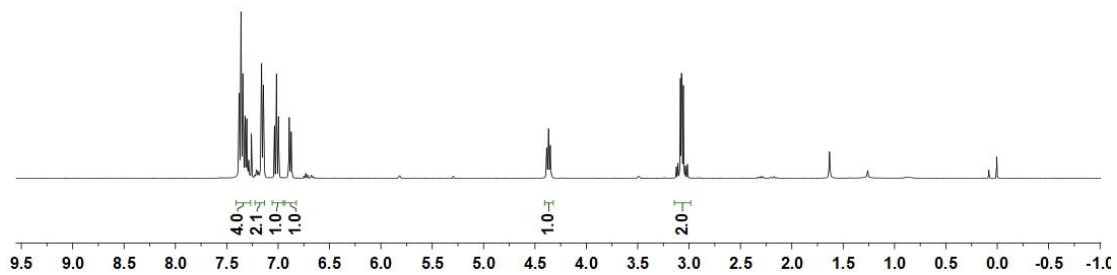

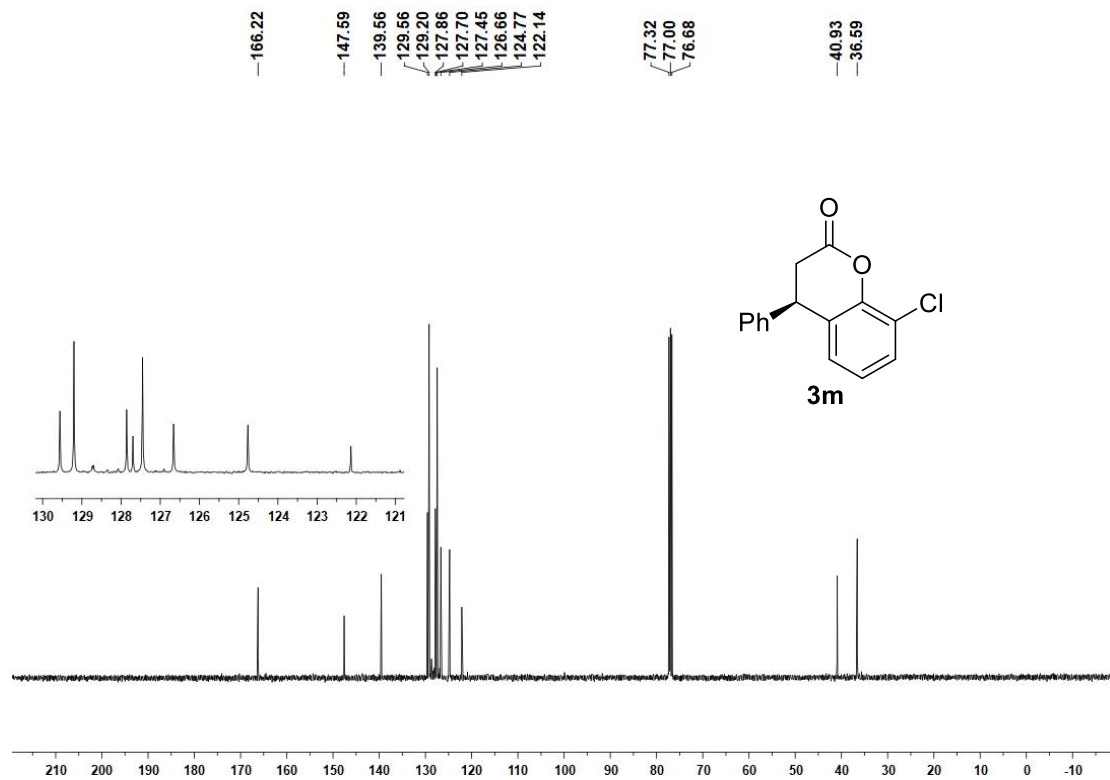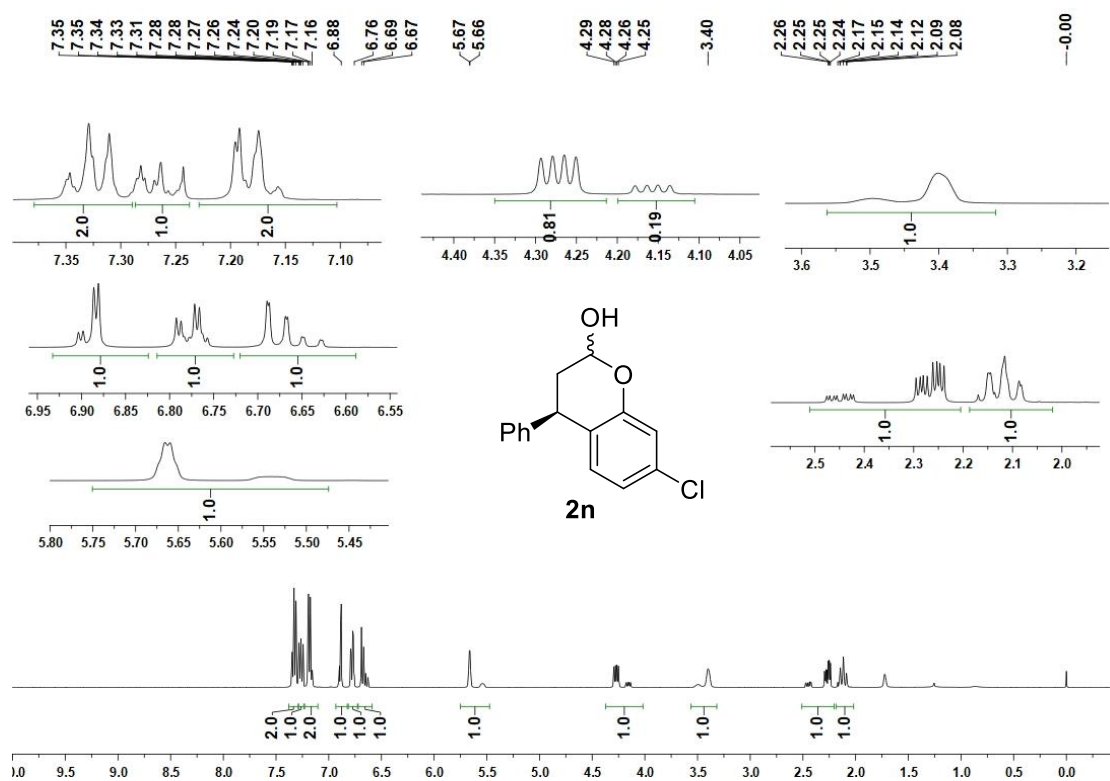

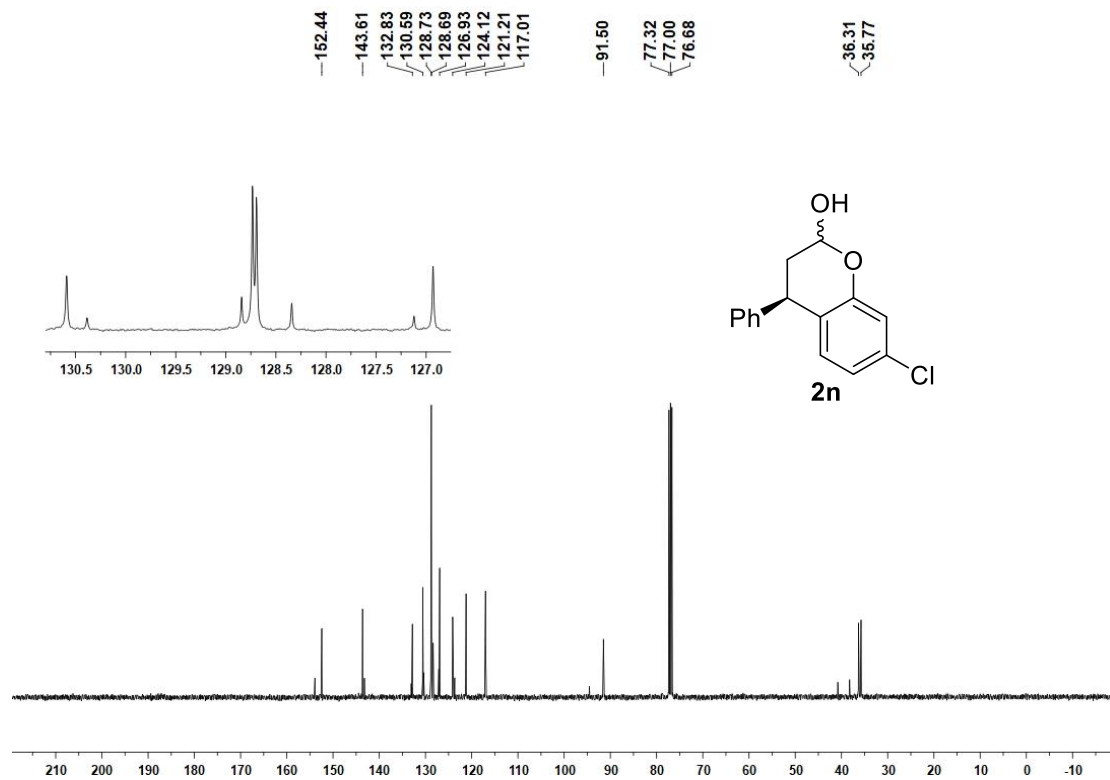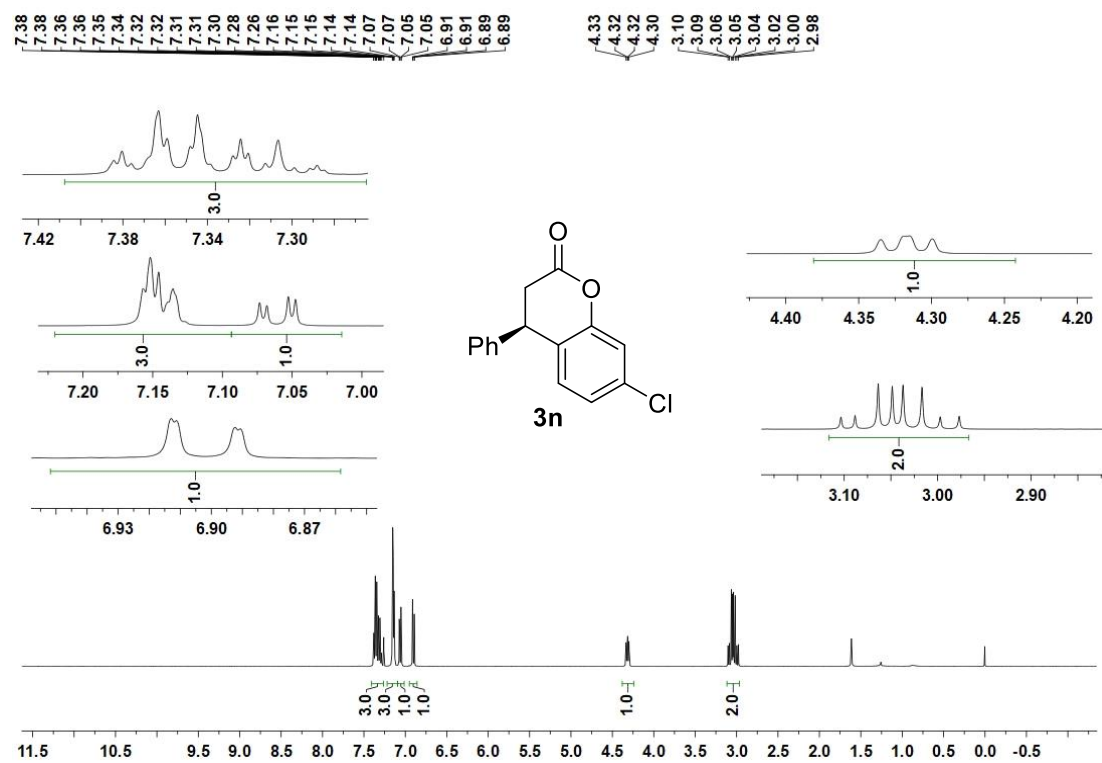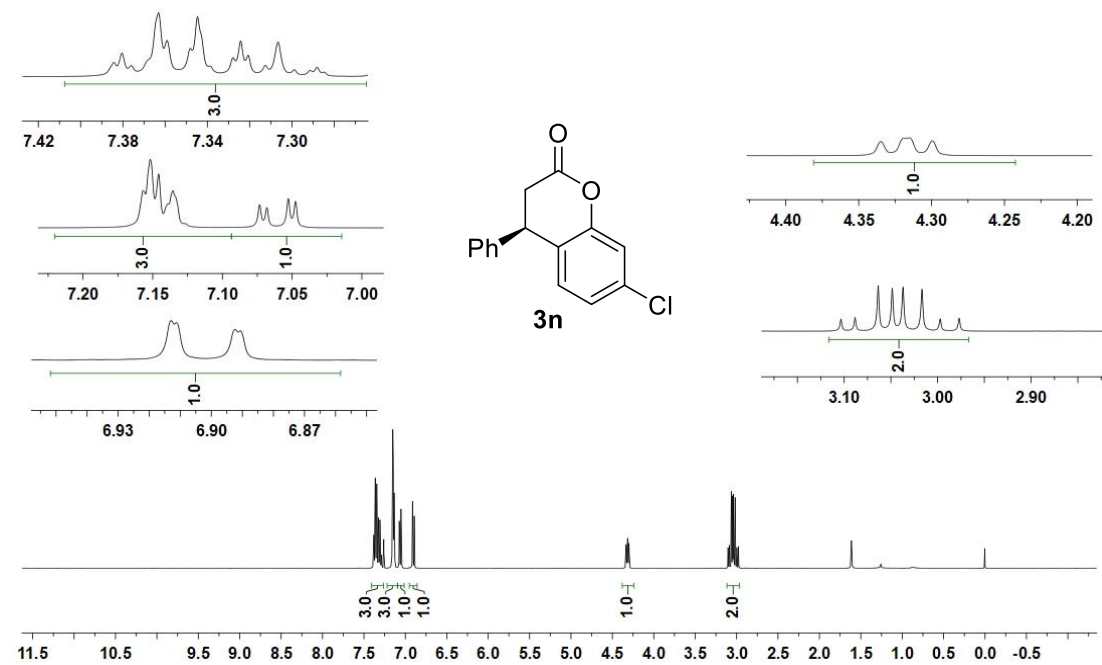

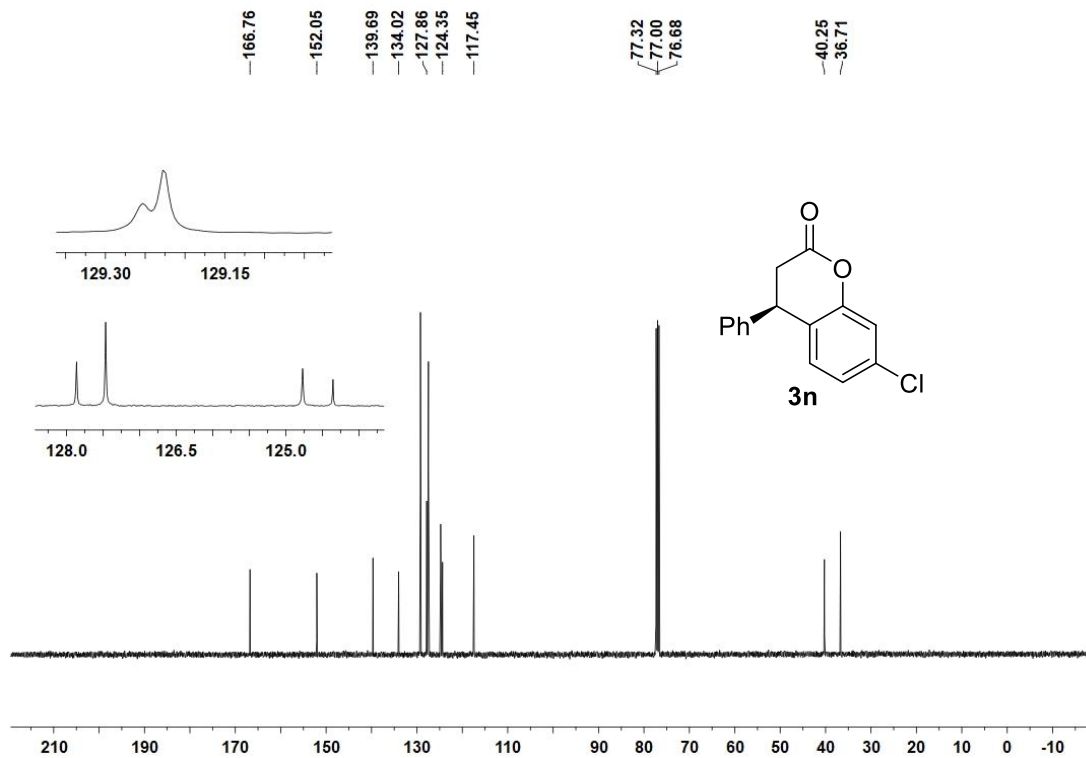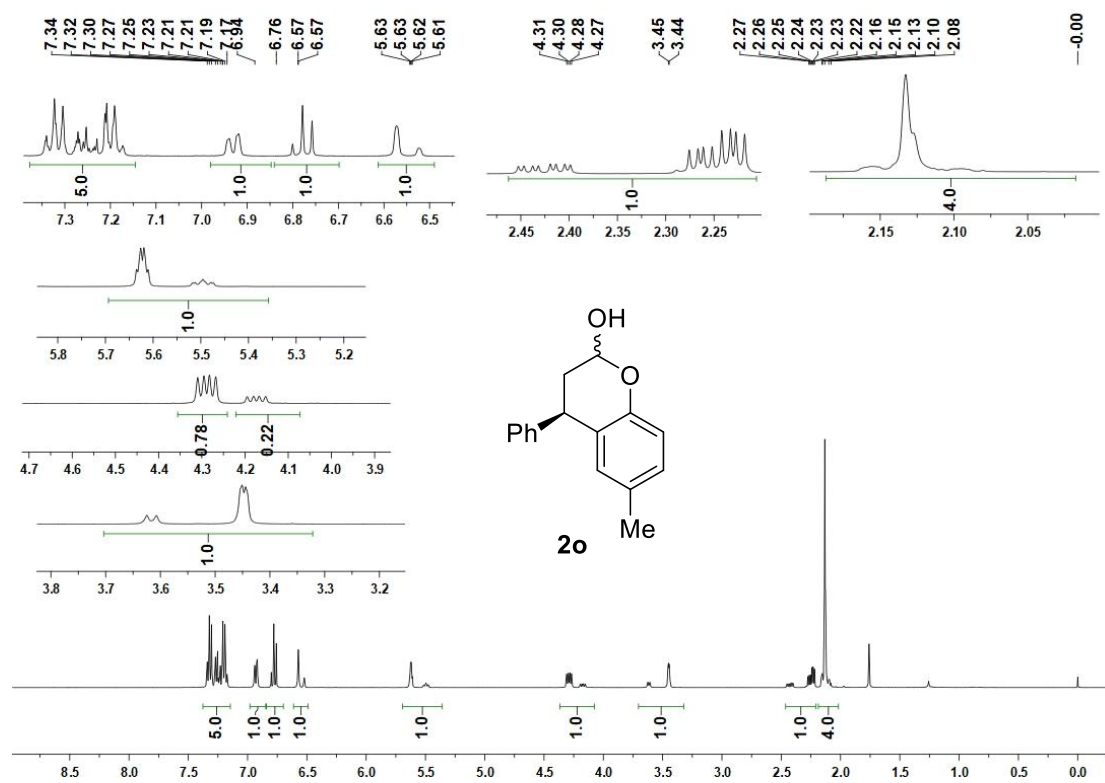

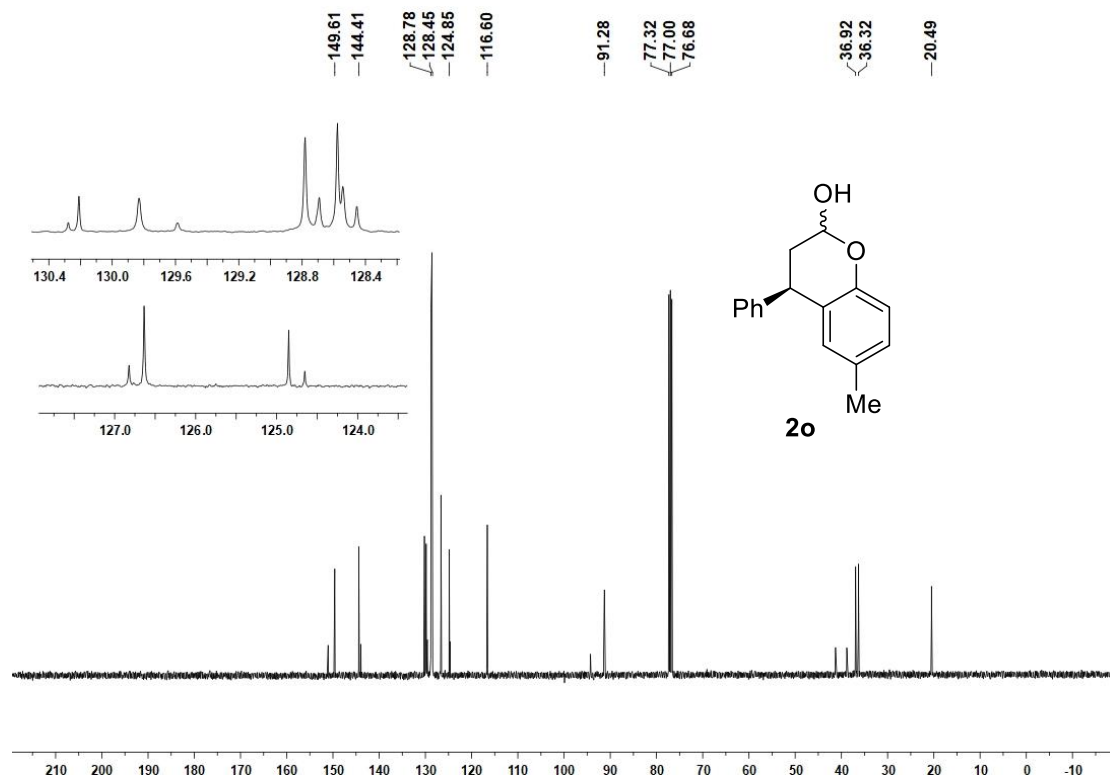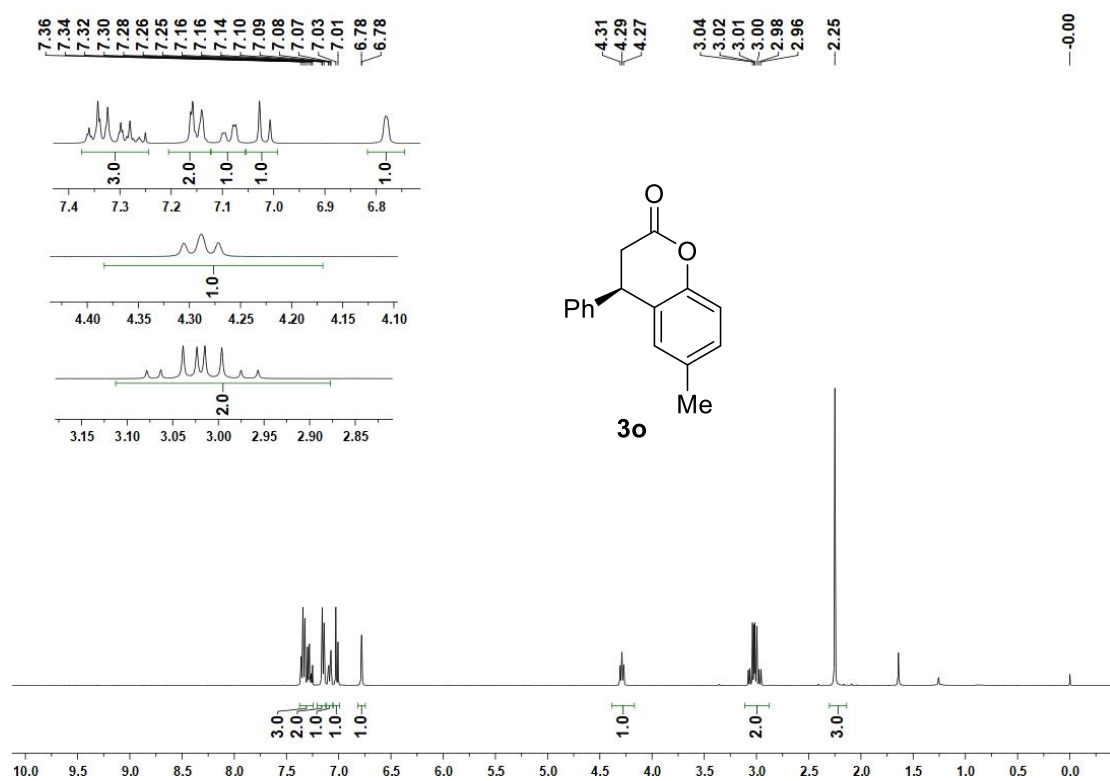

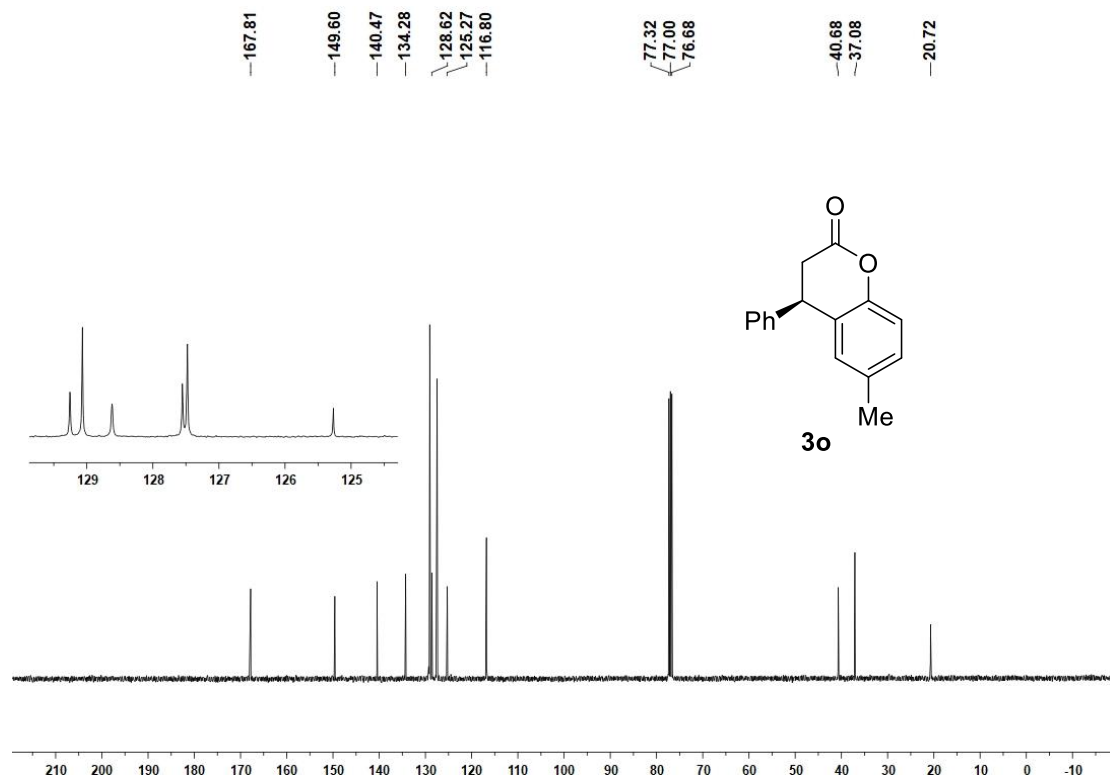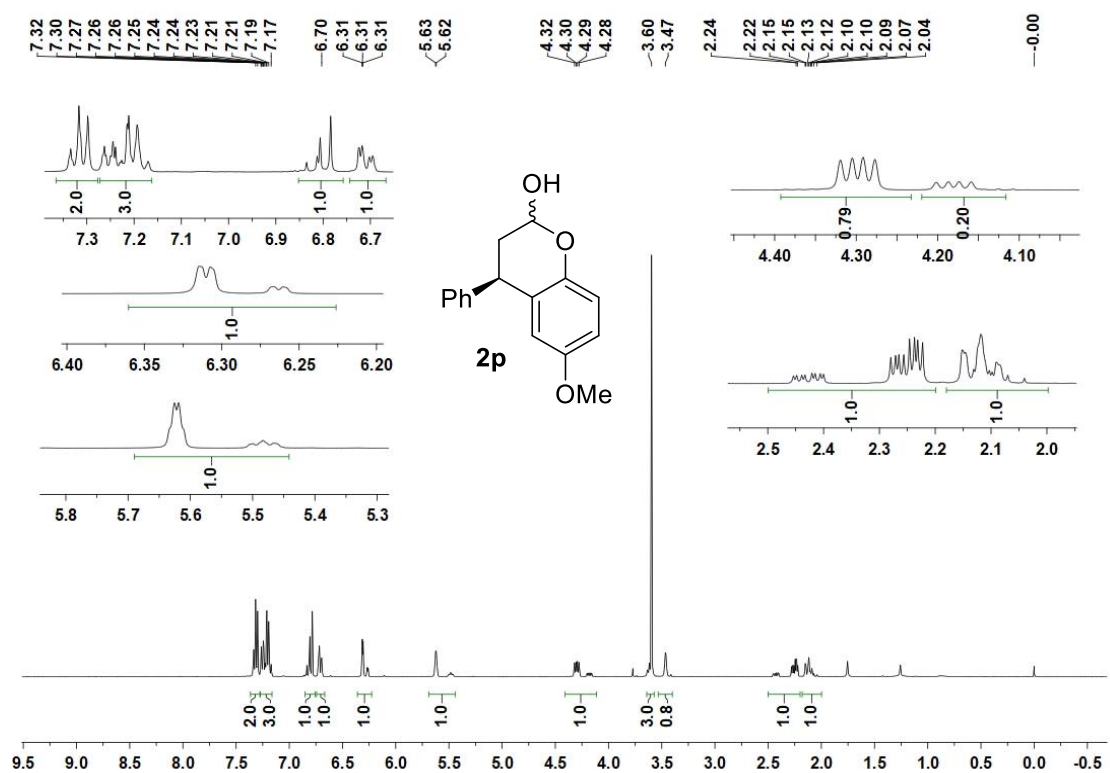

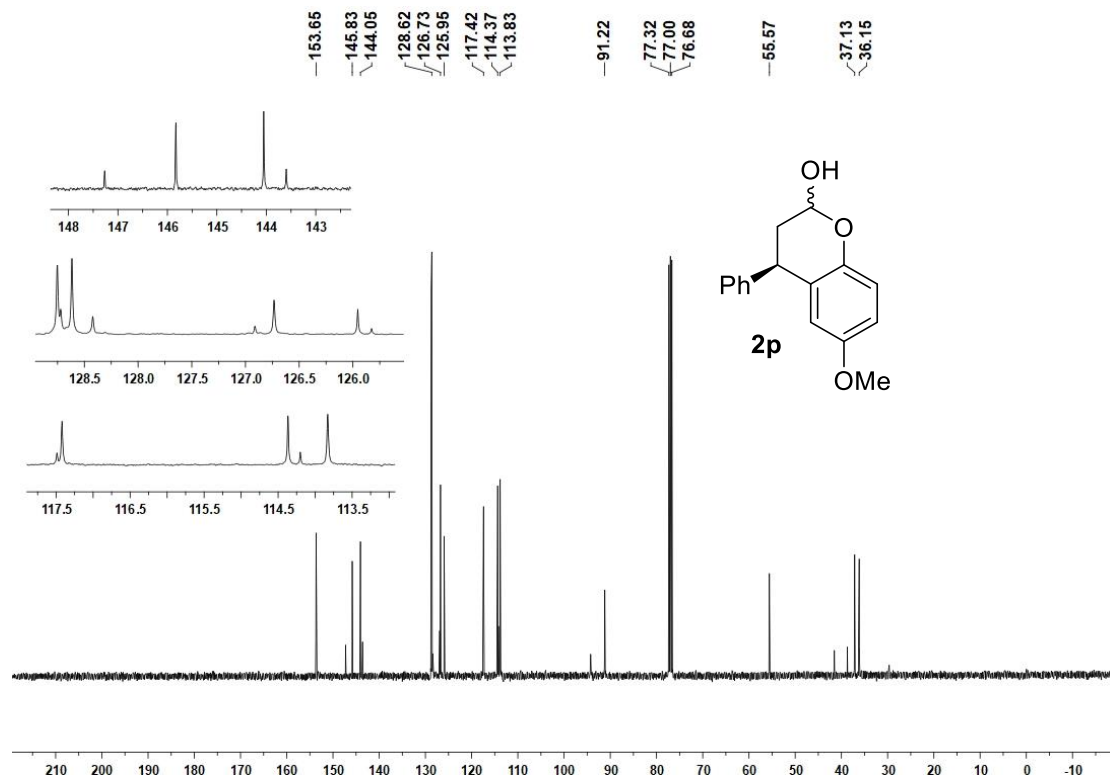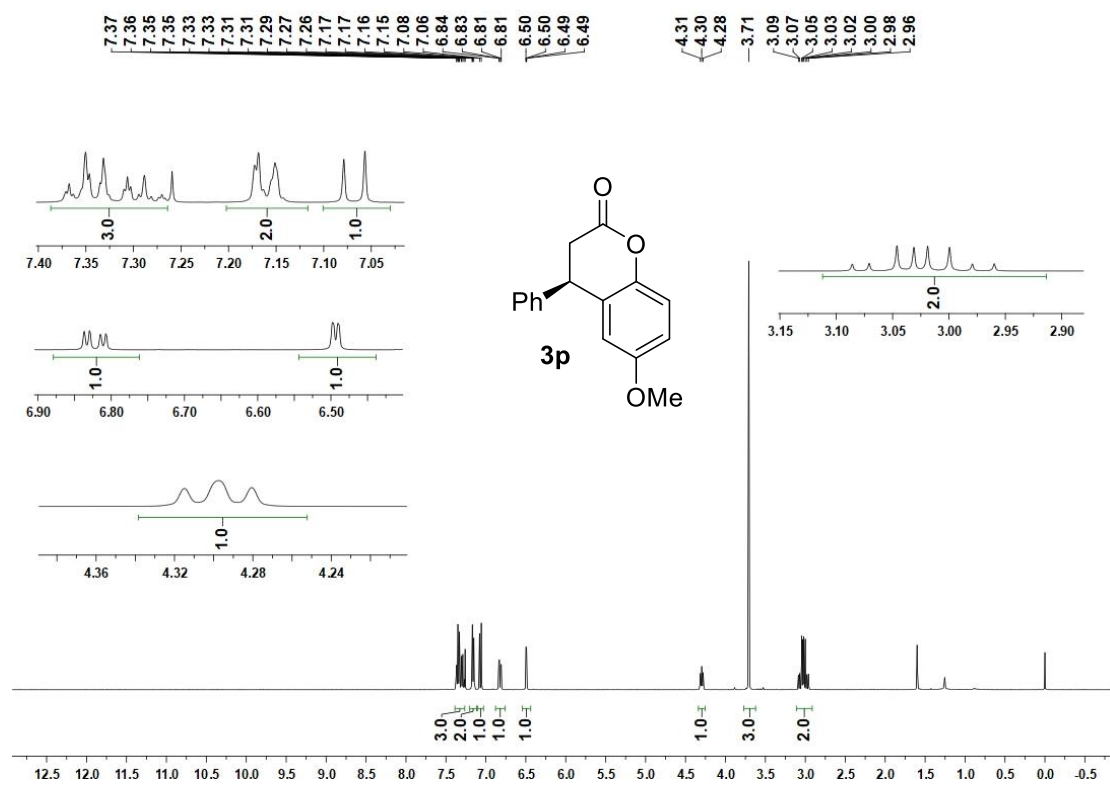

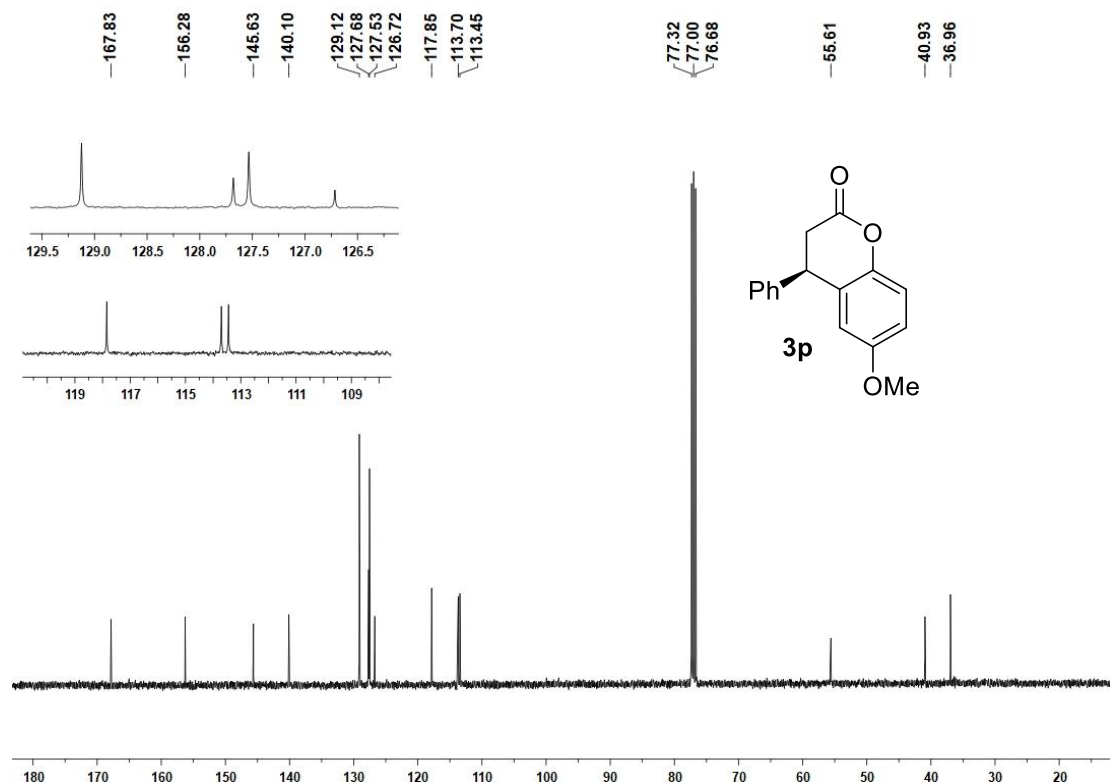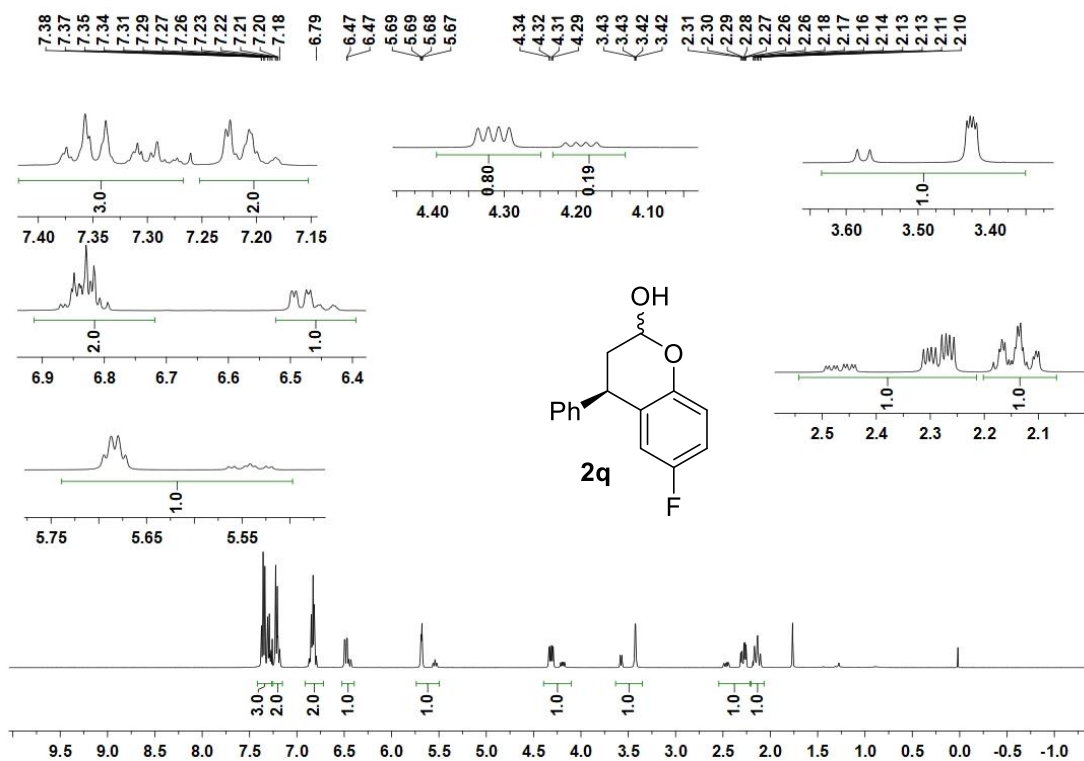



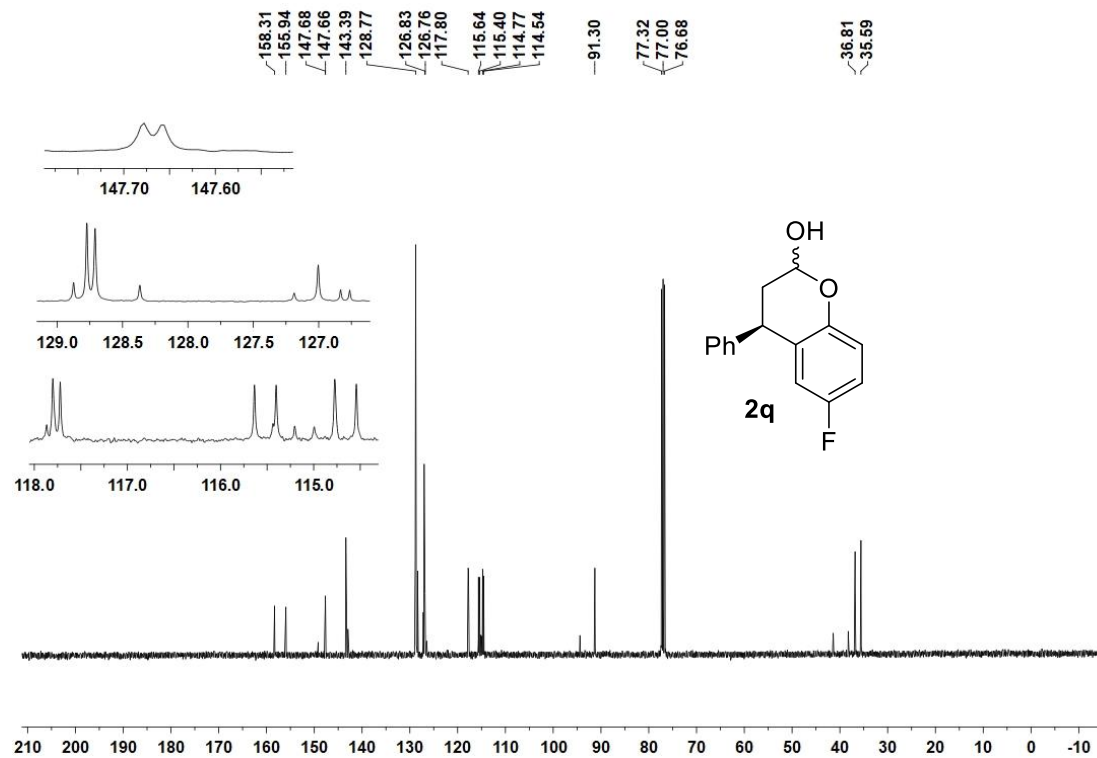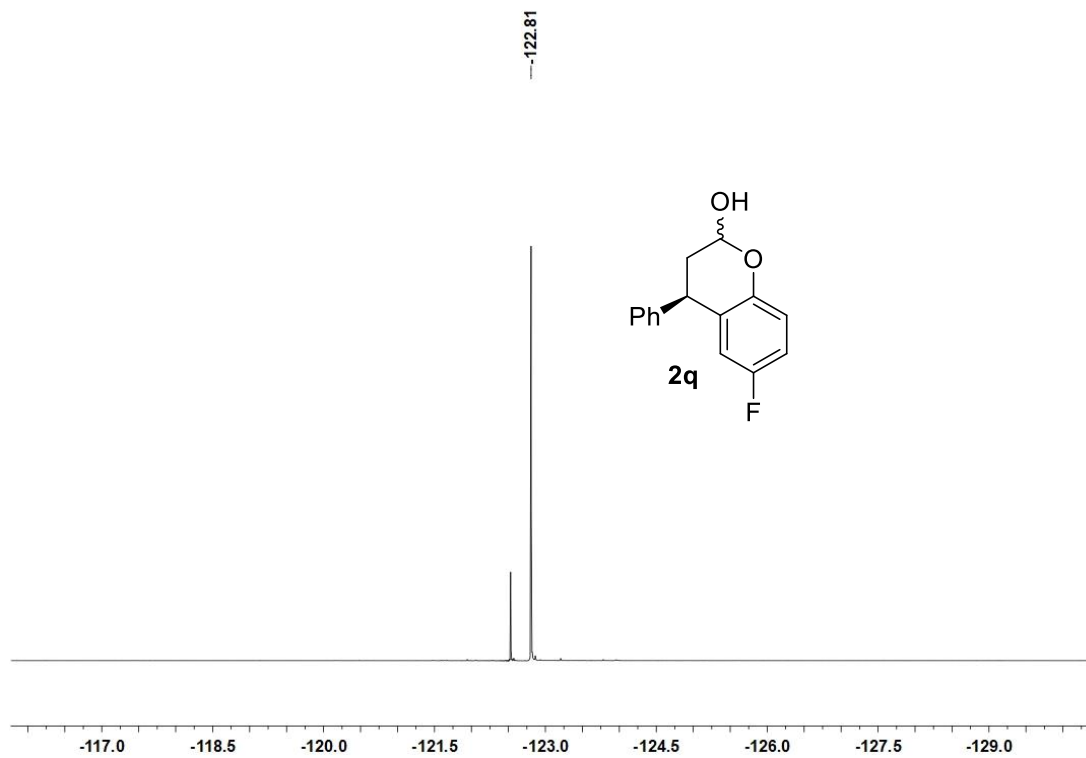

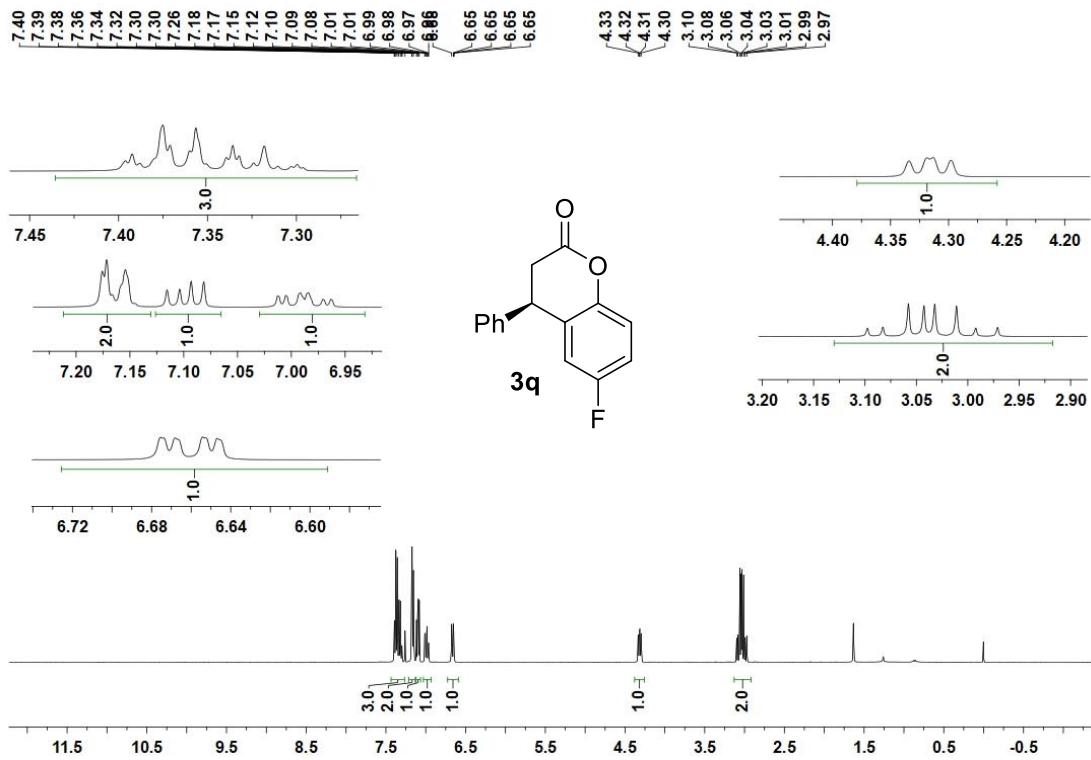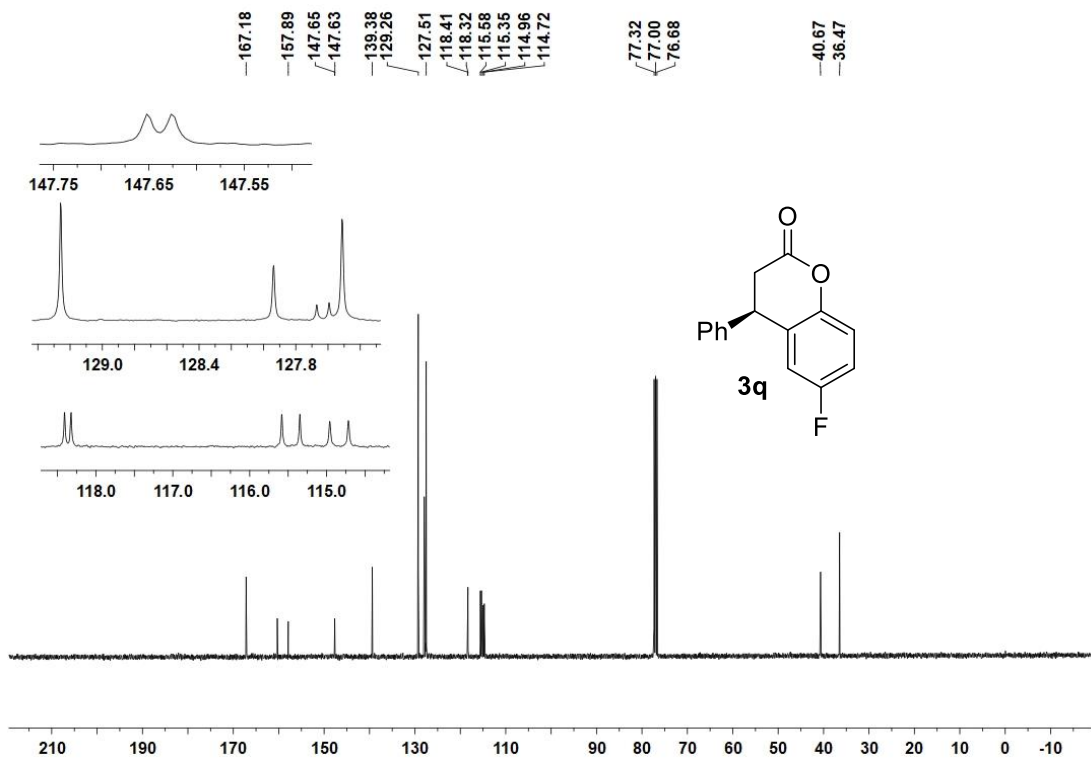

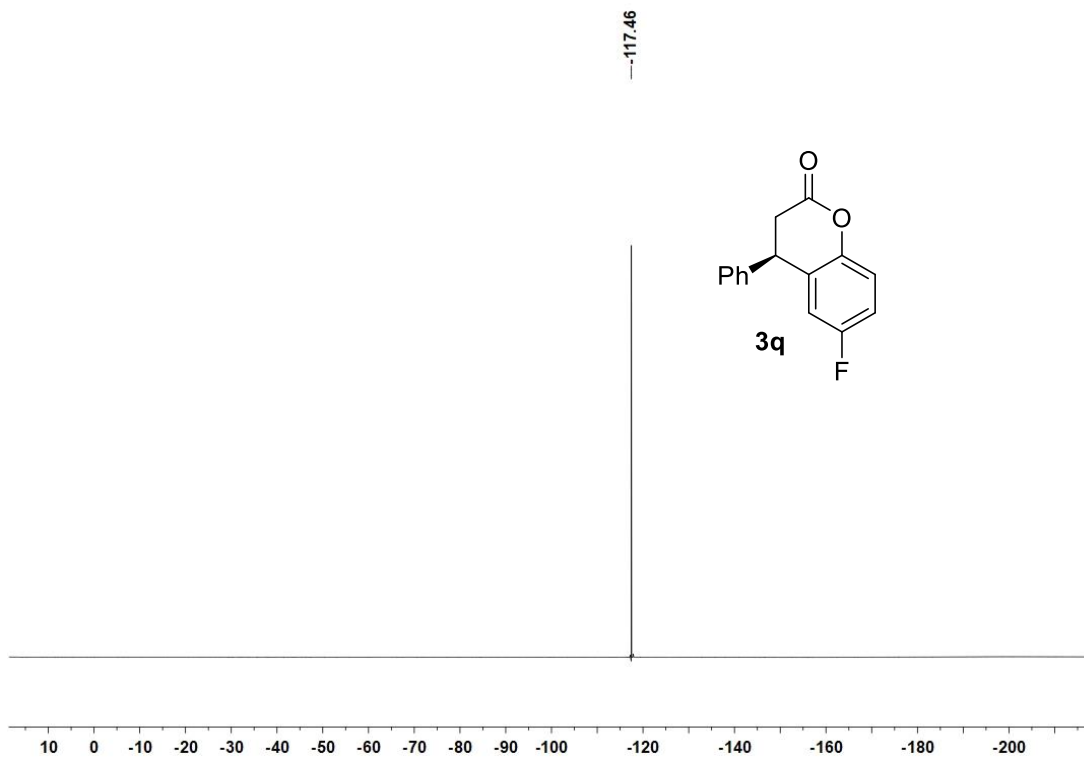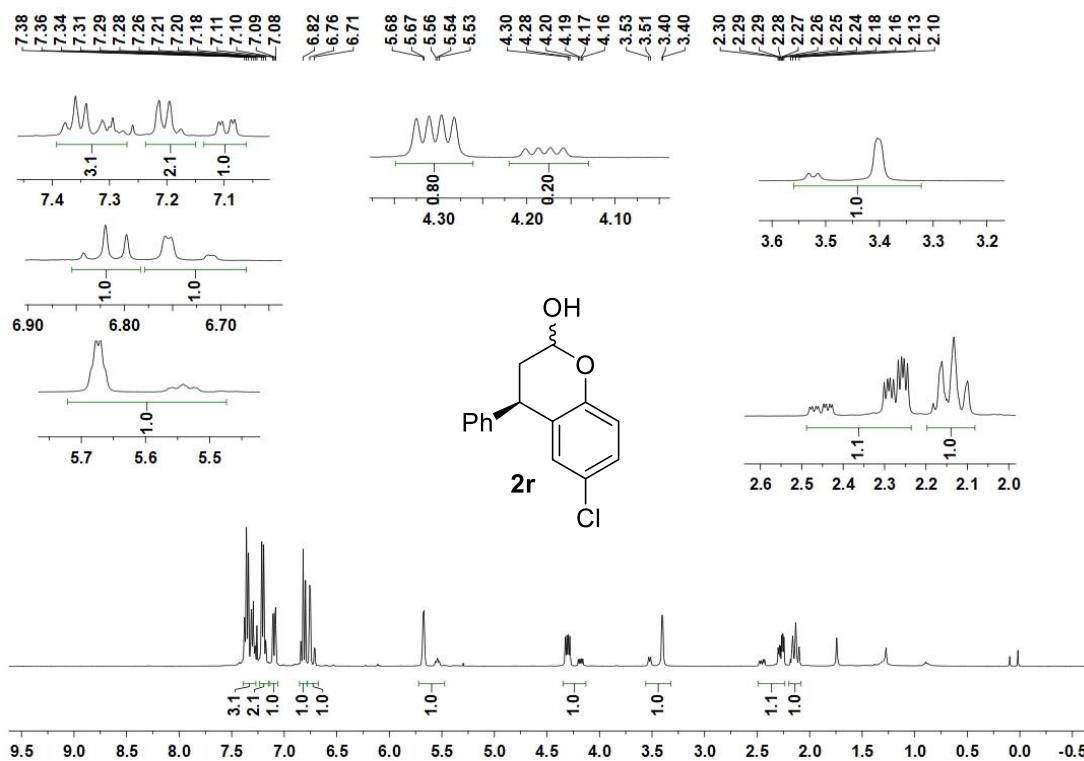

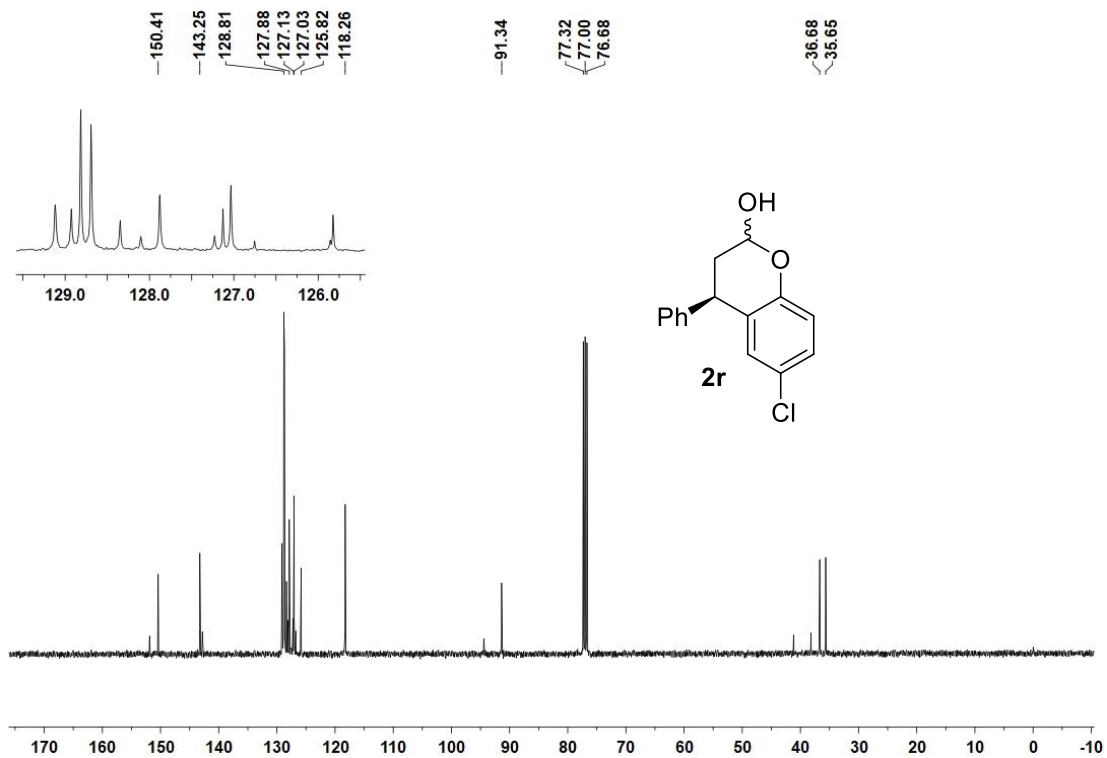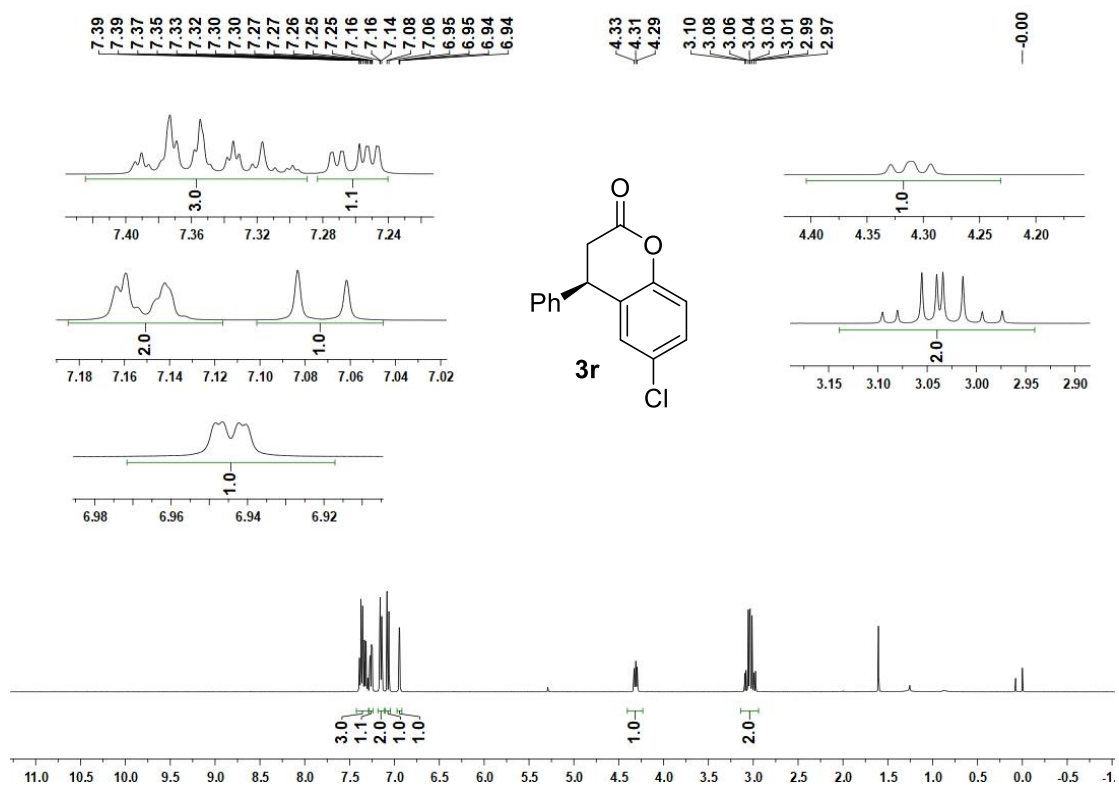

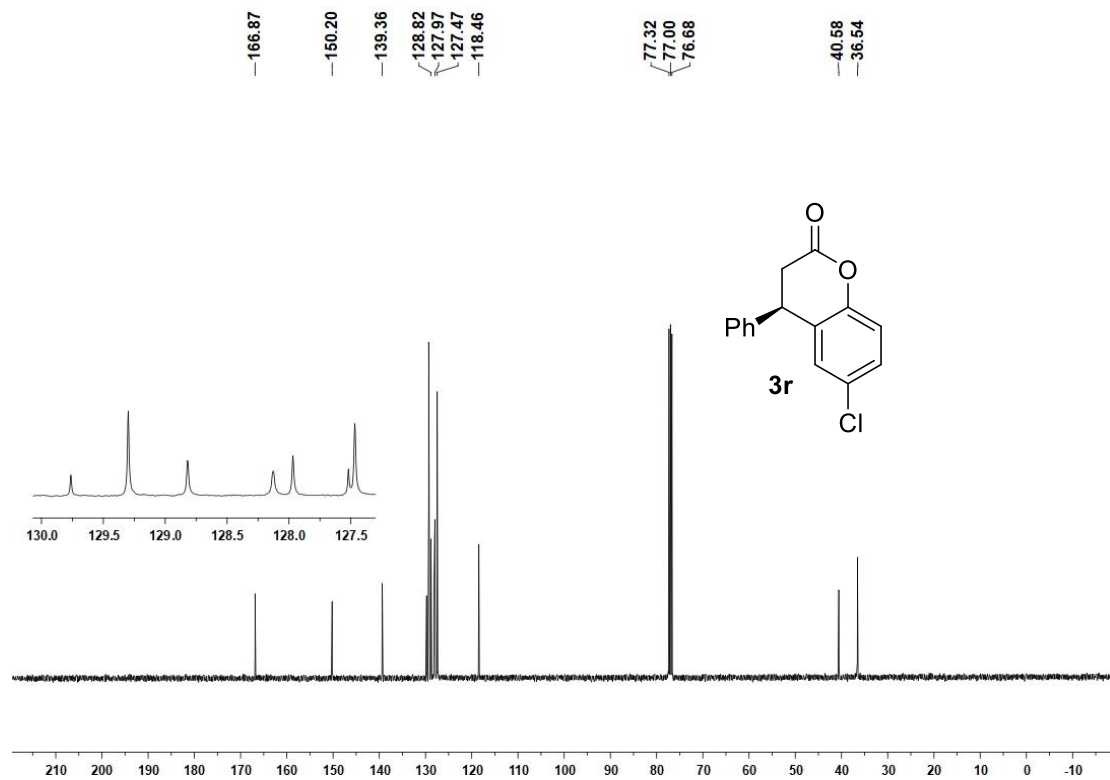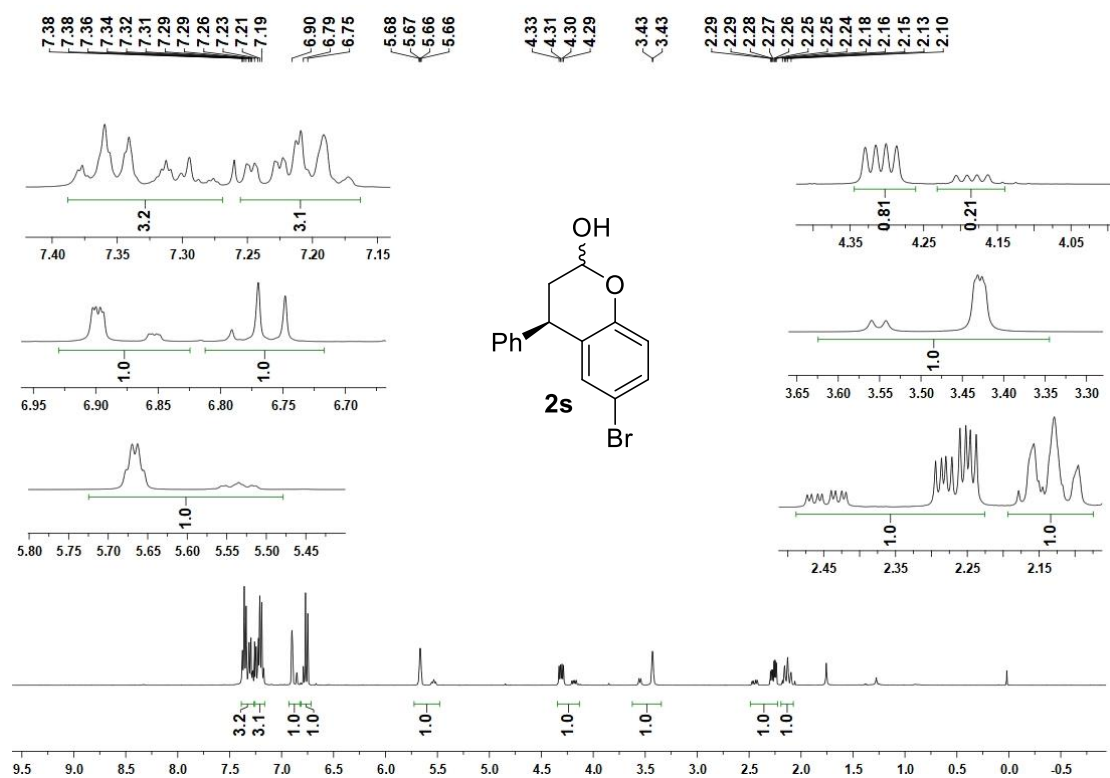

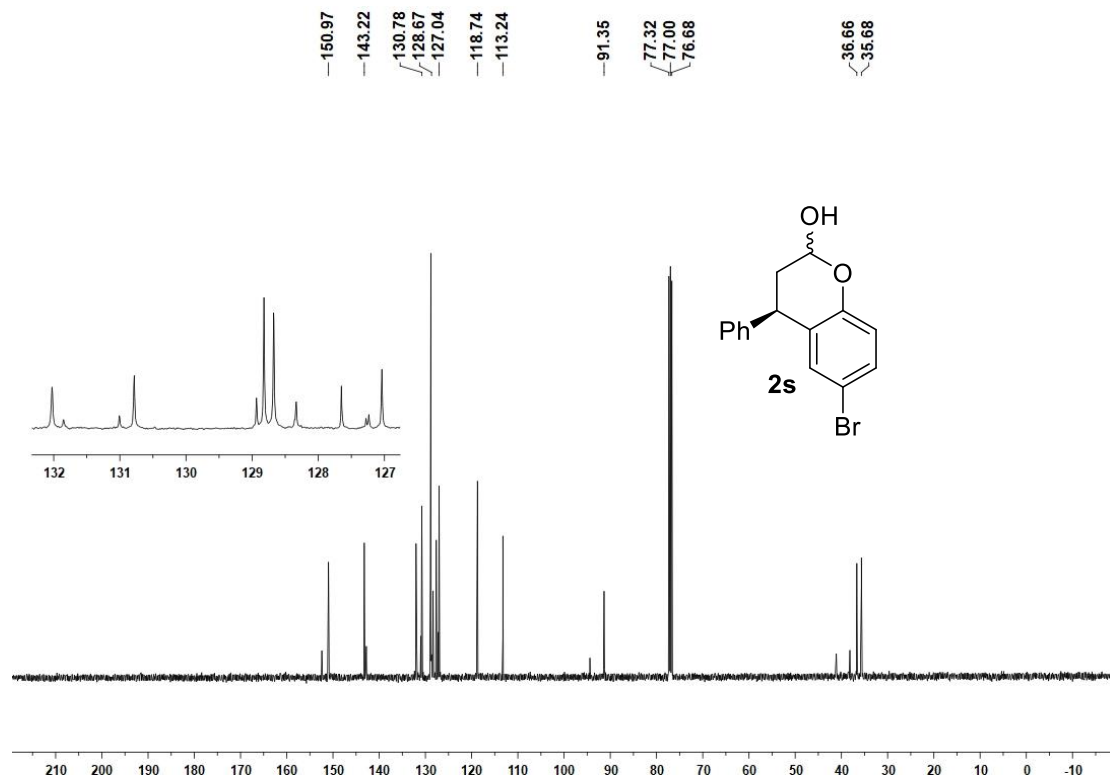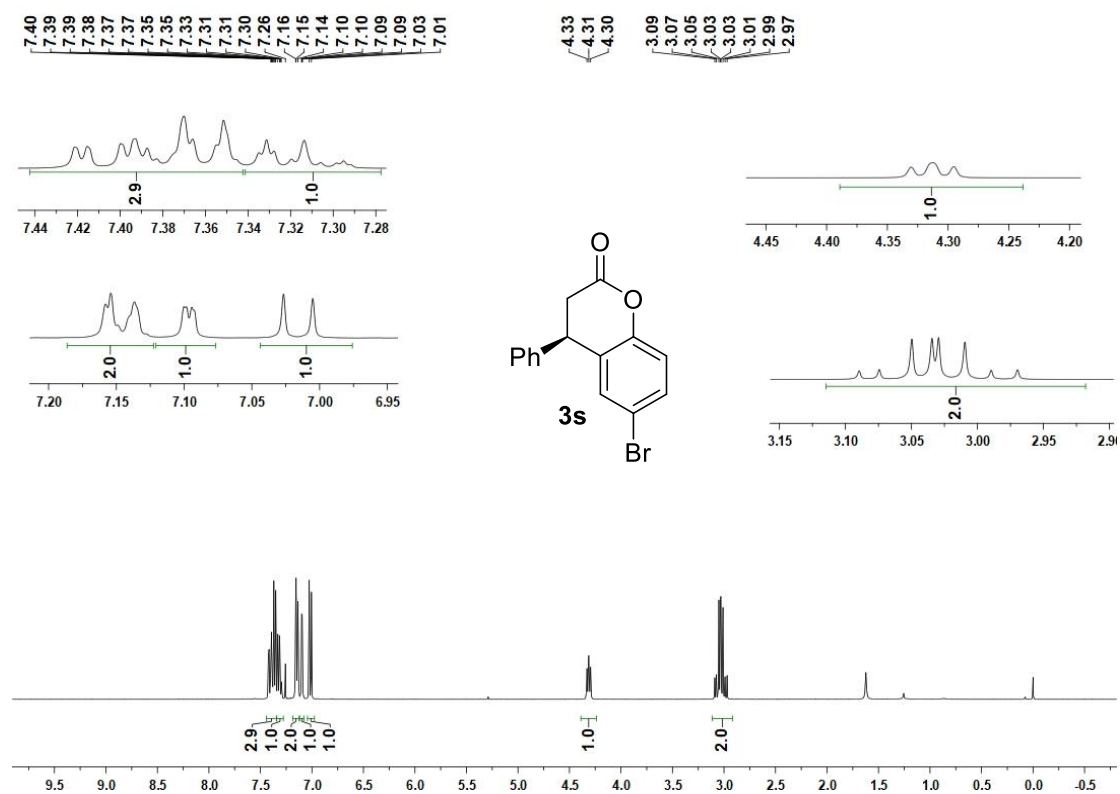

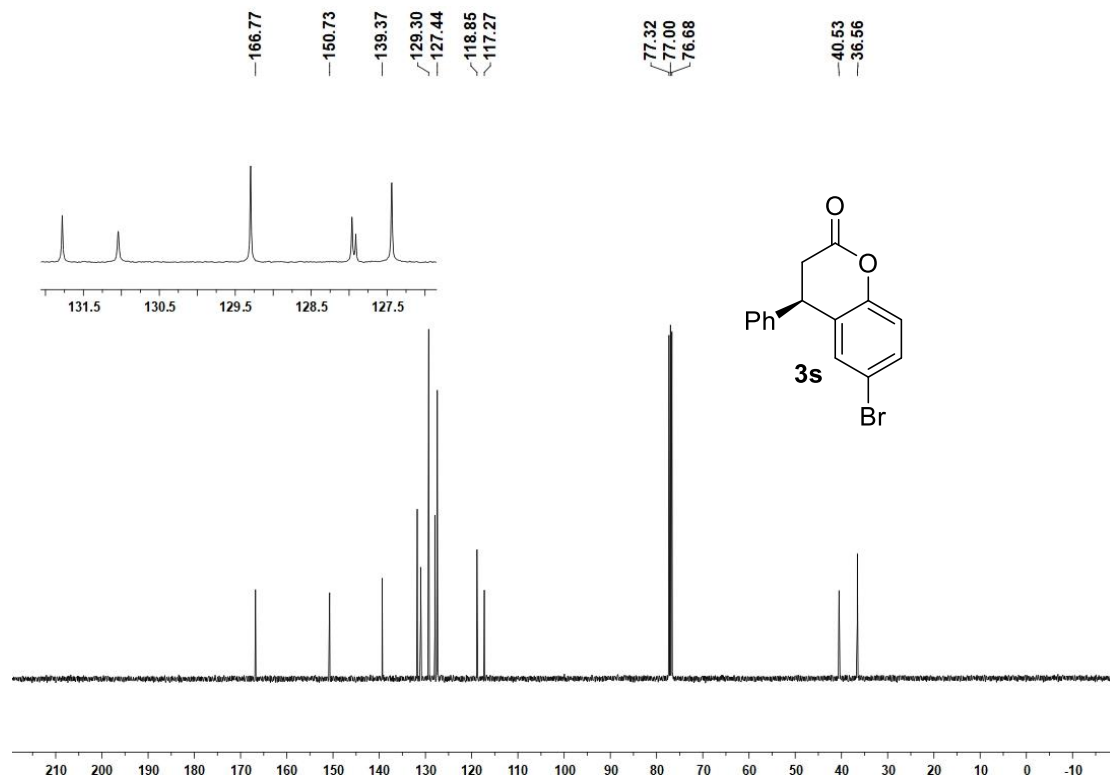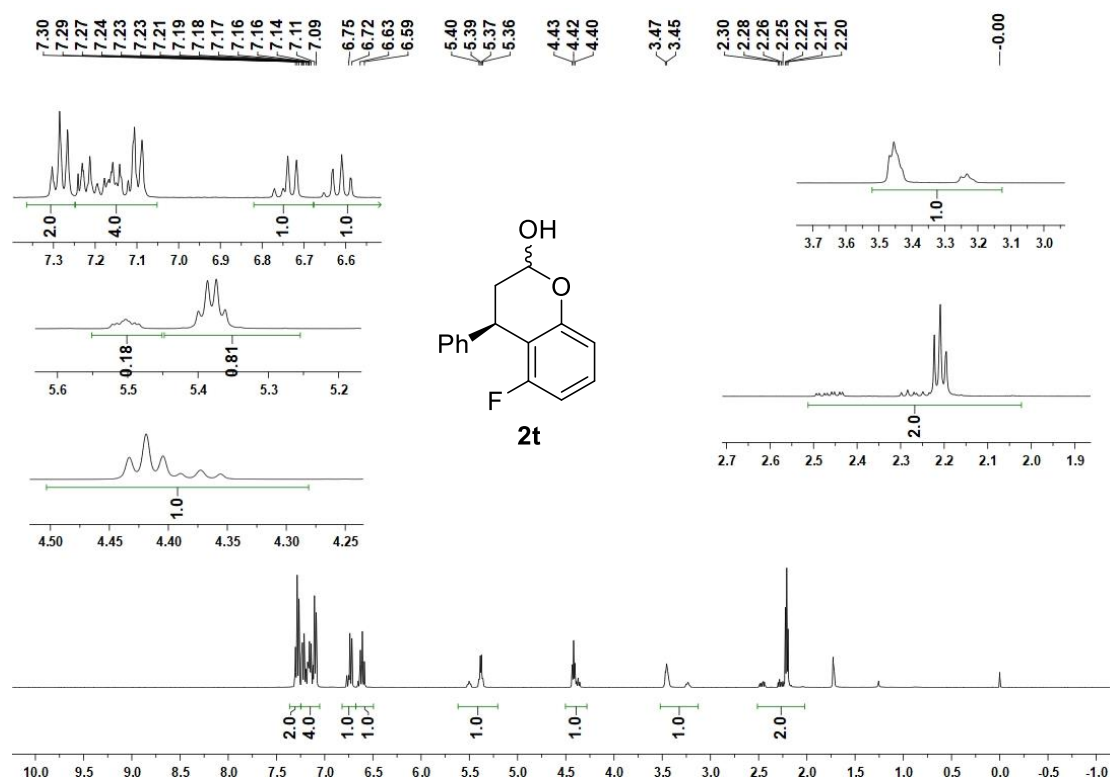

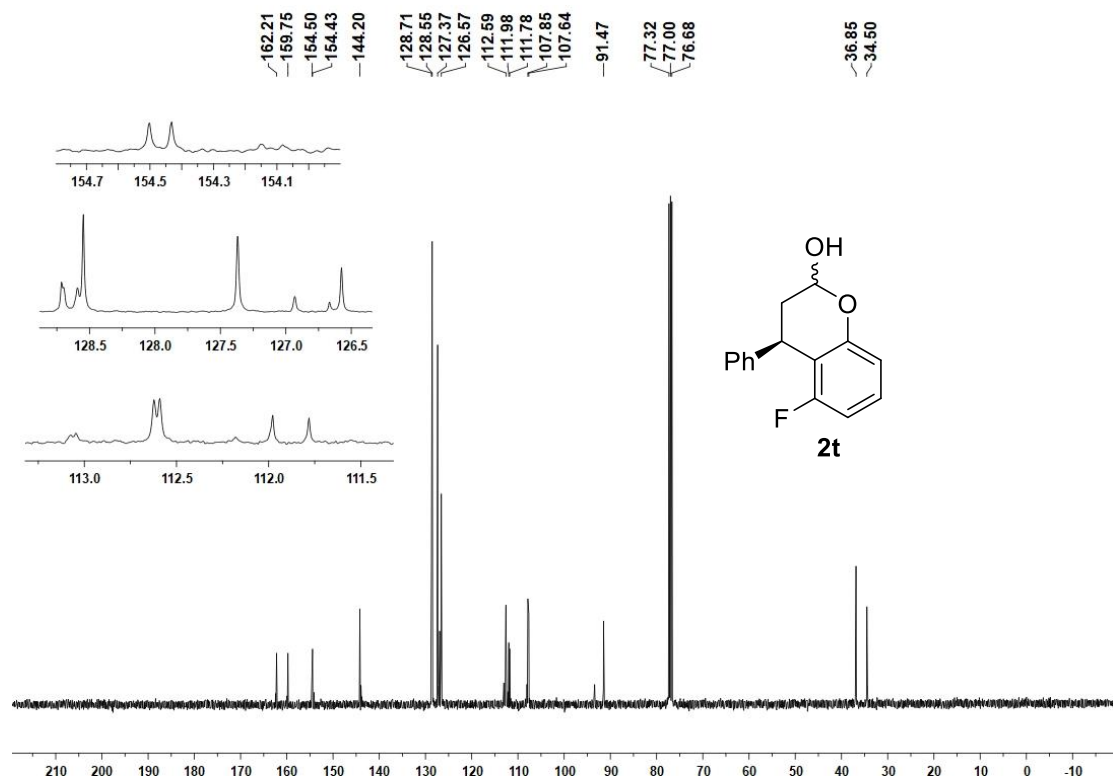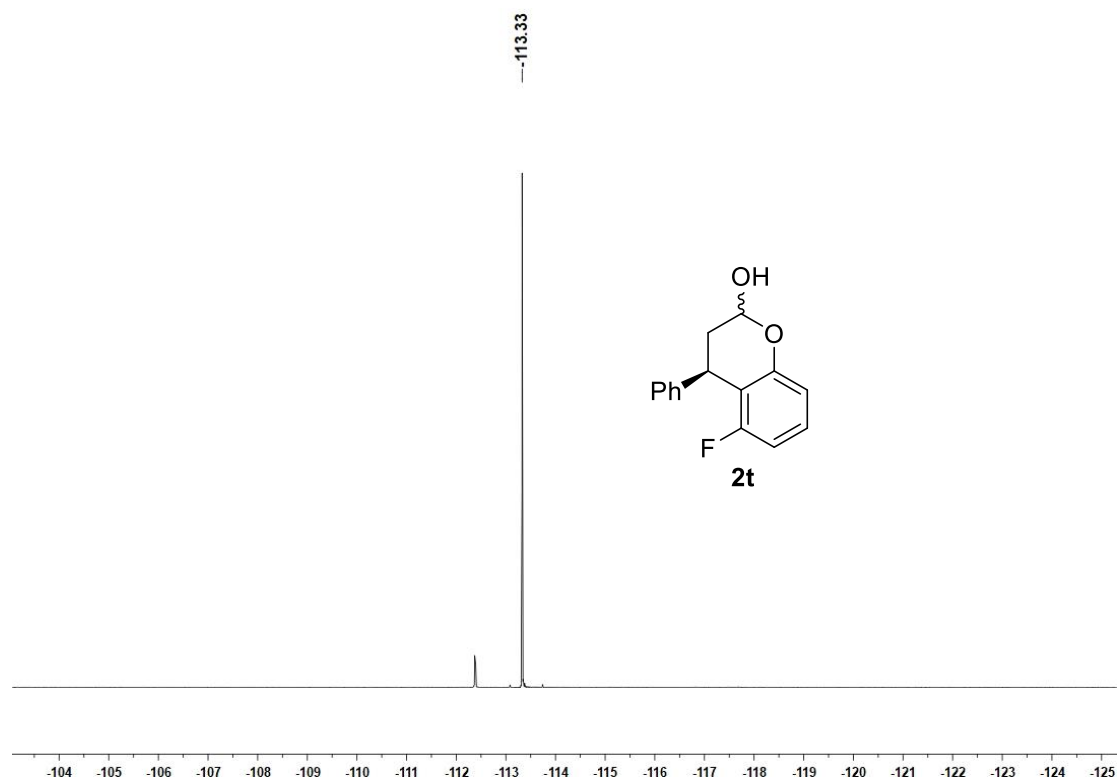



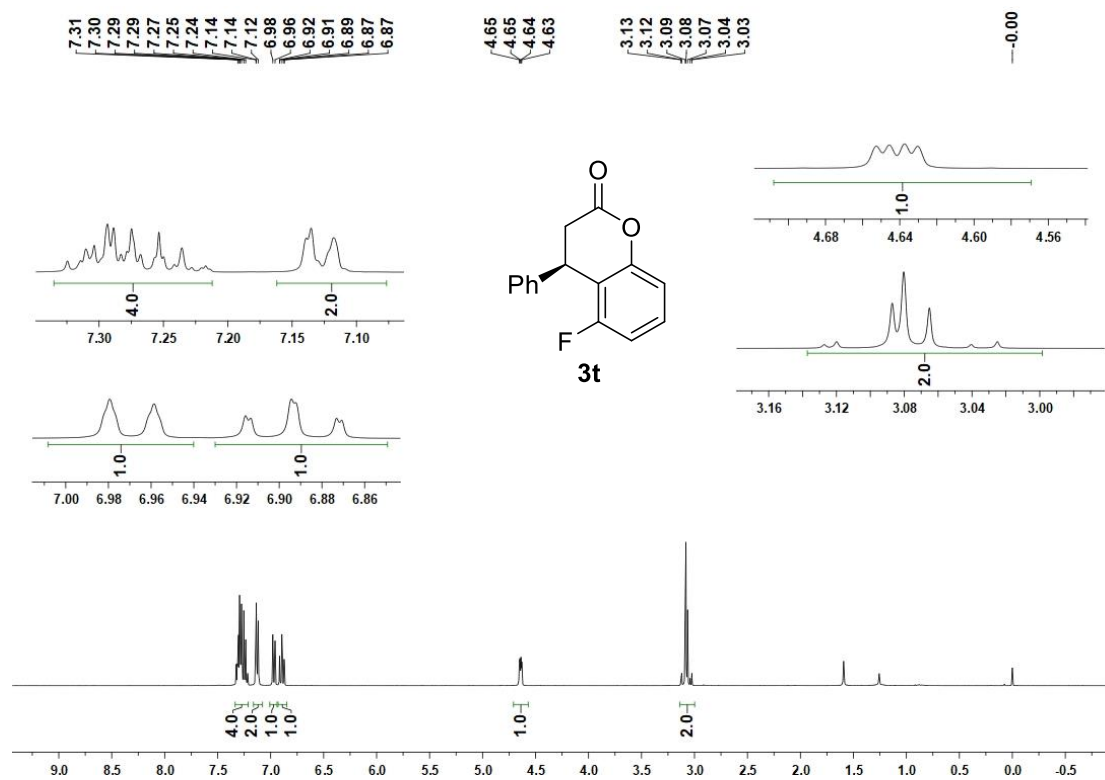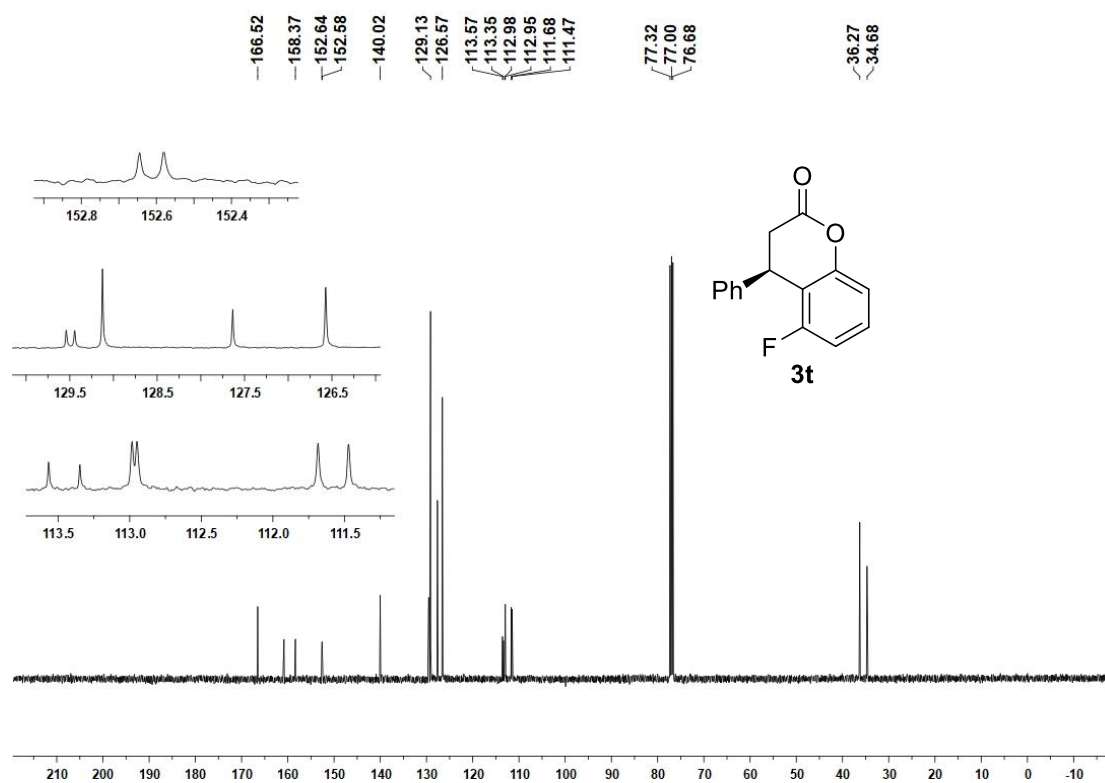

--116.47

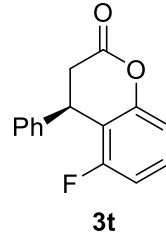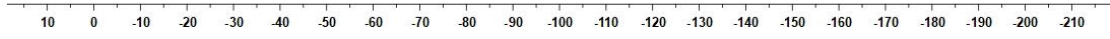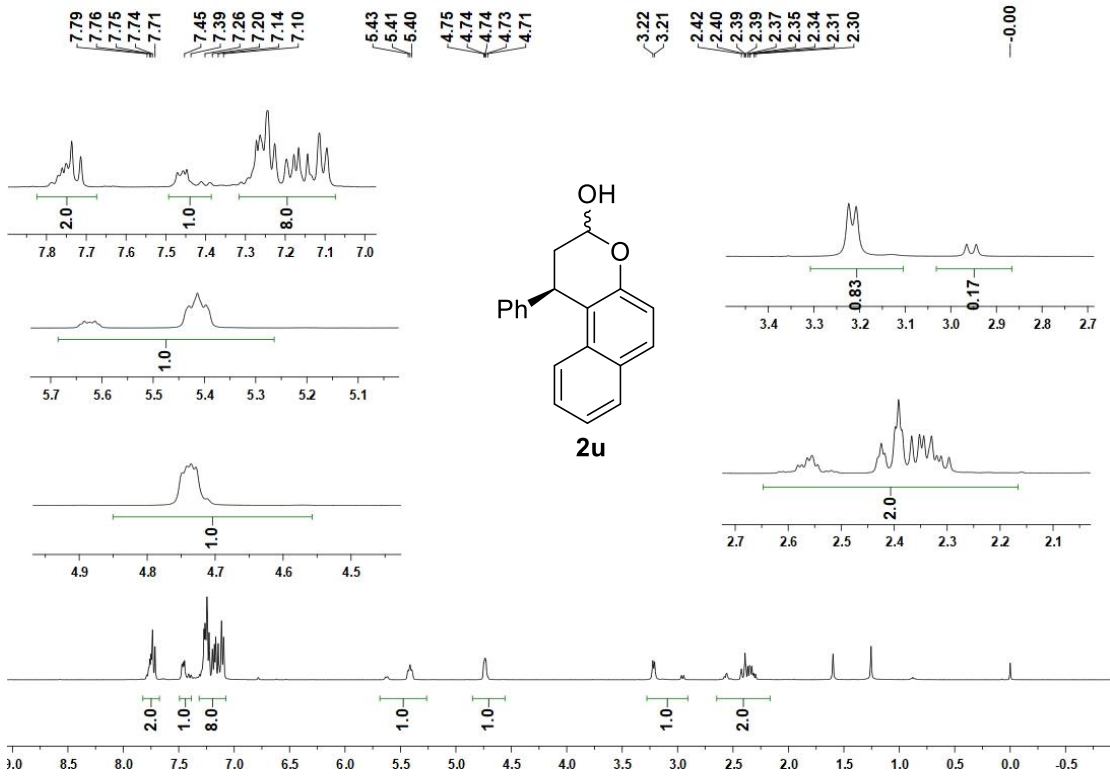

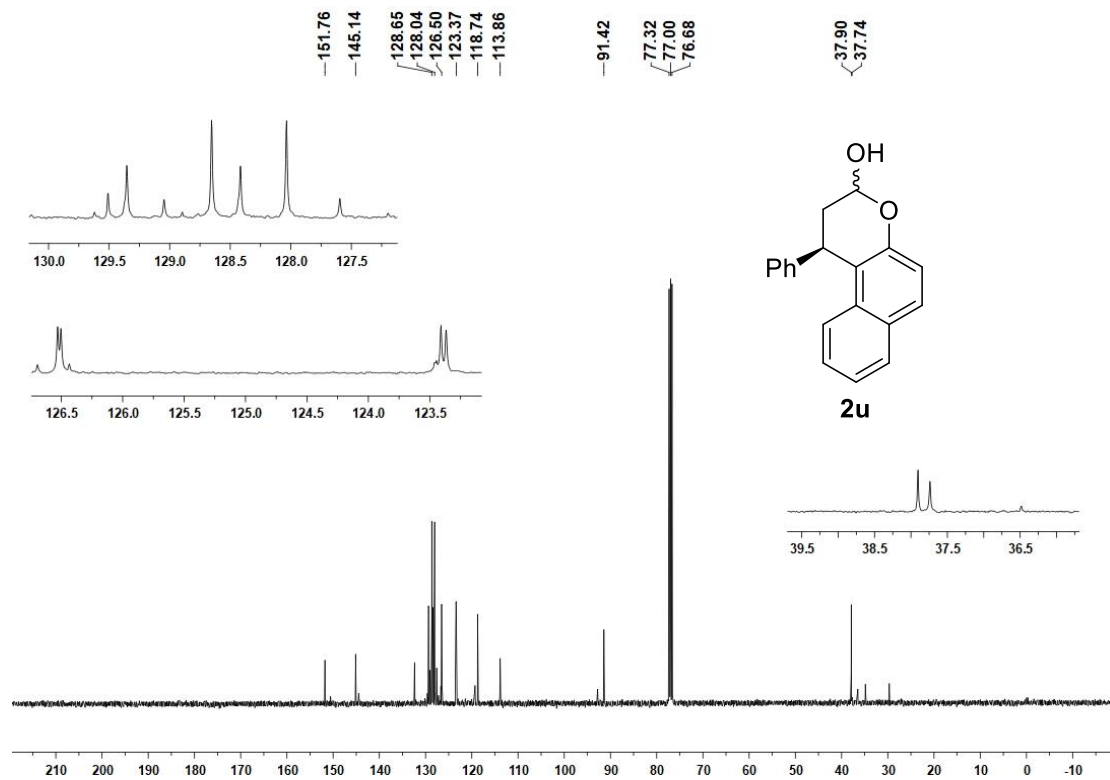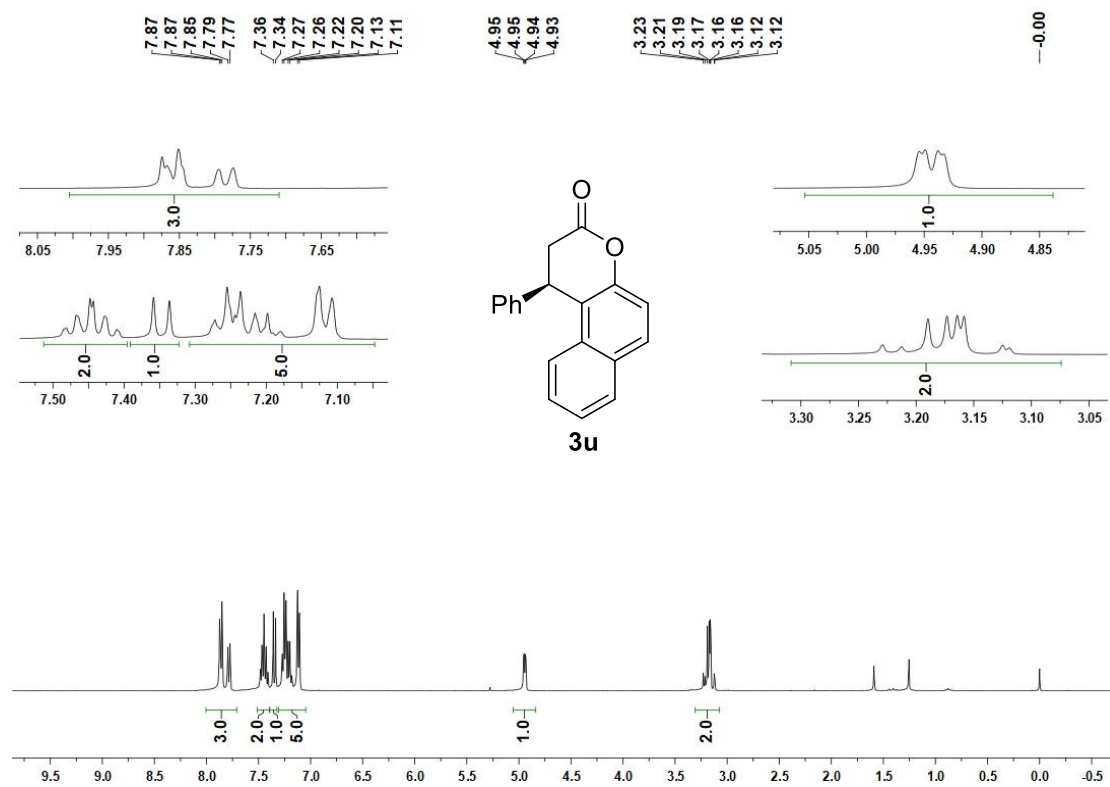

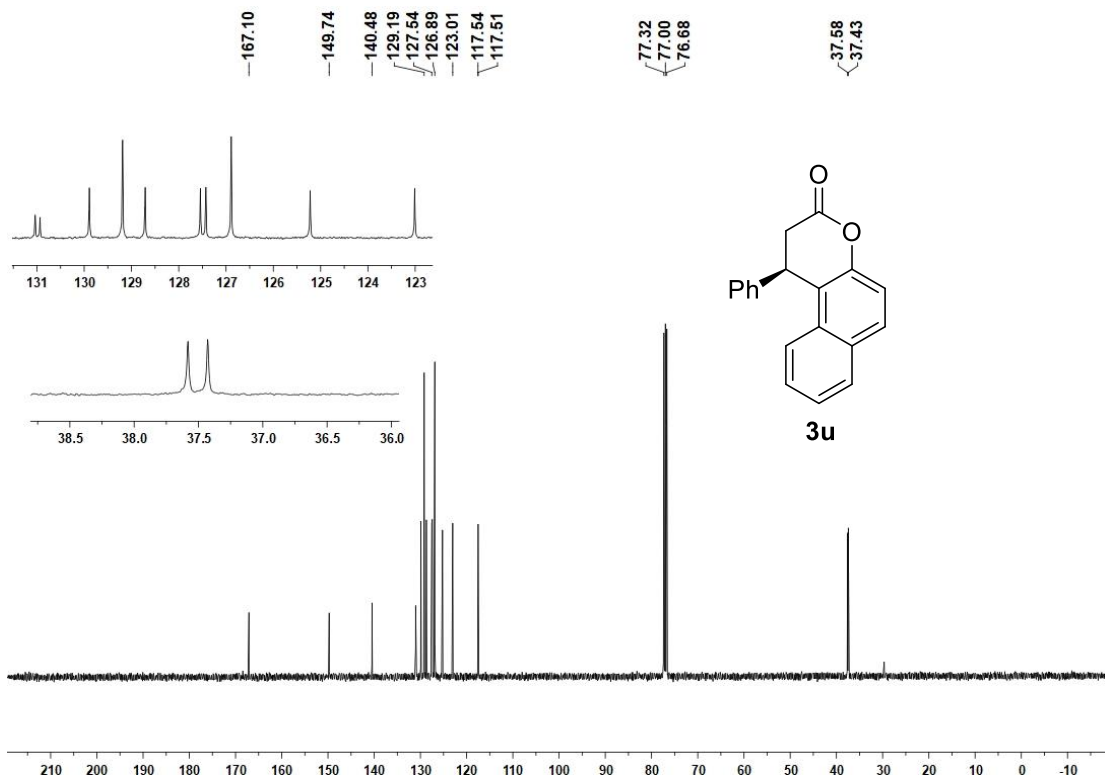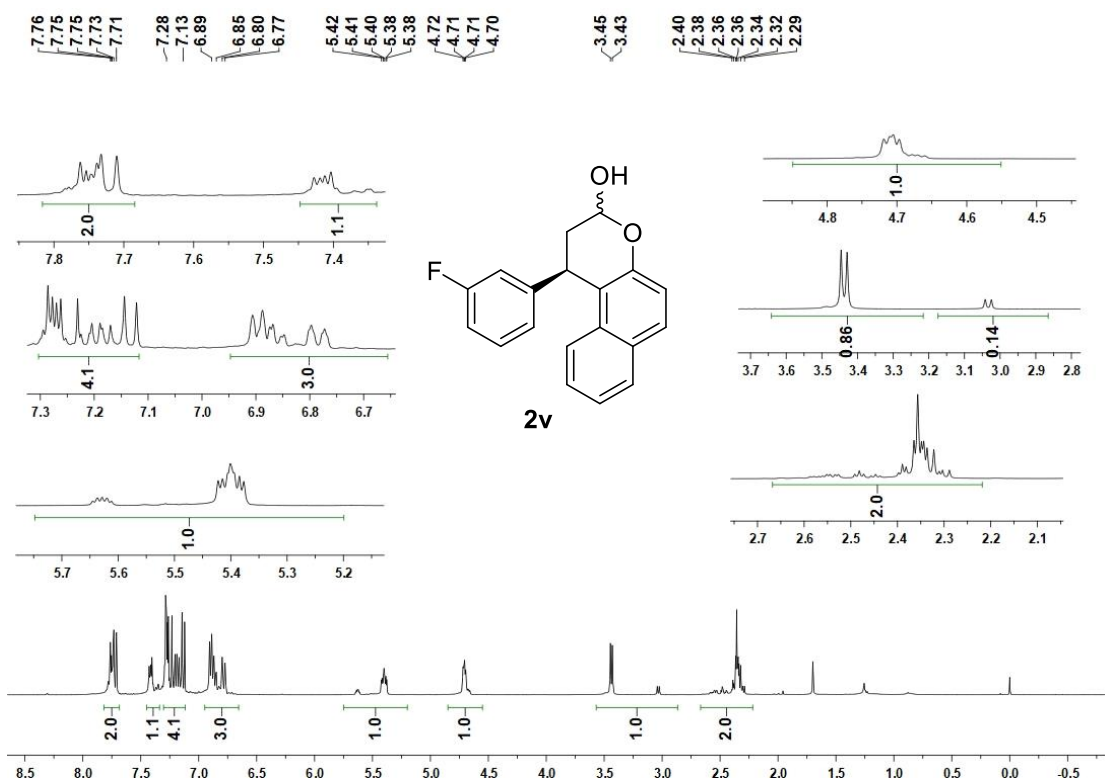

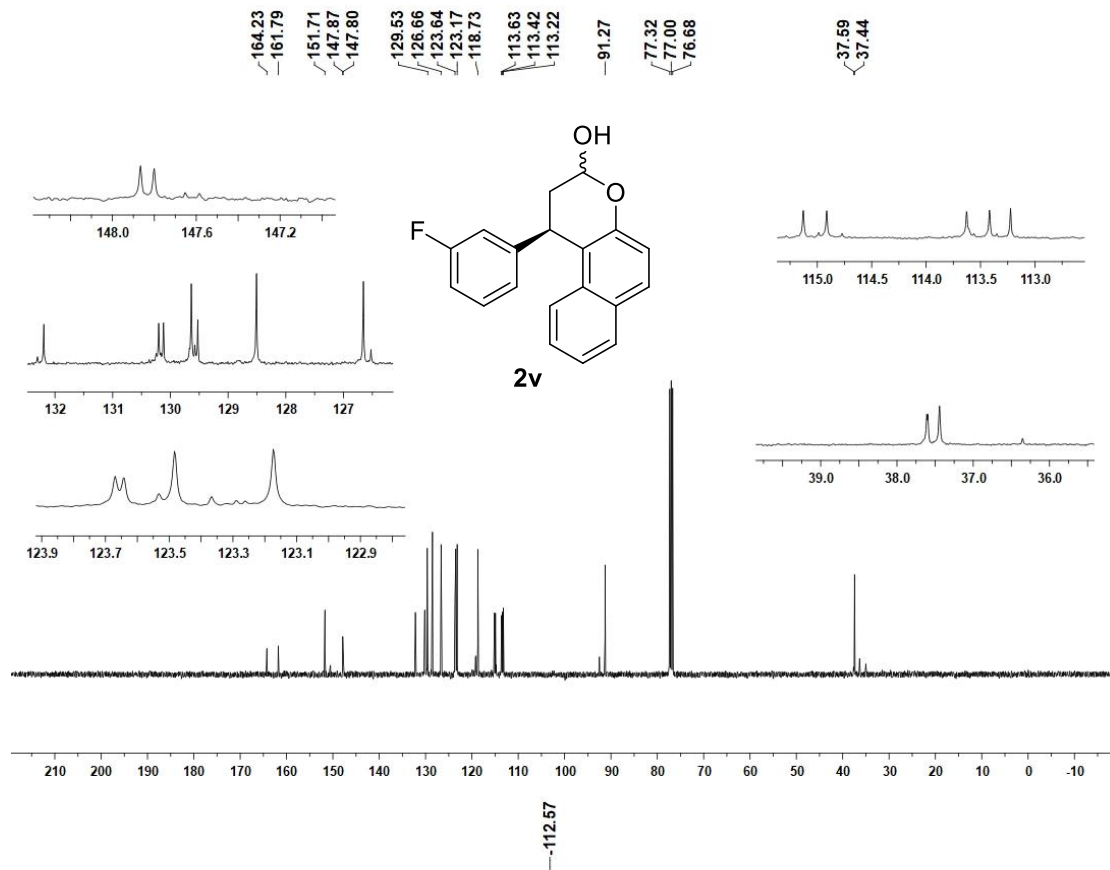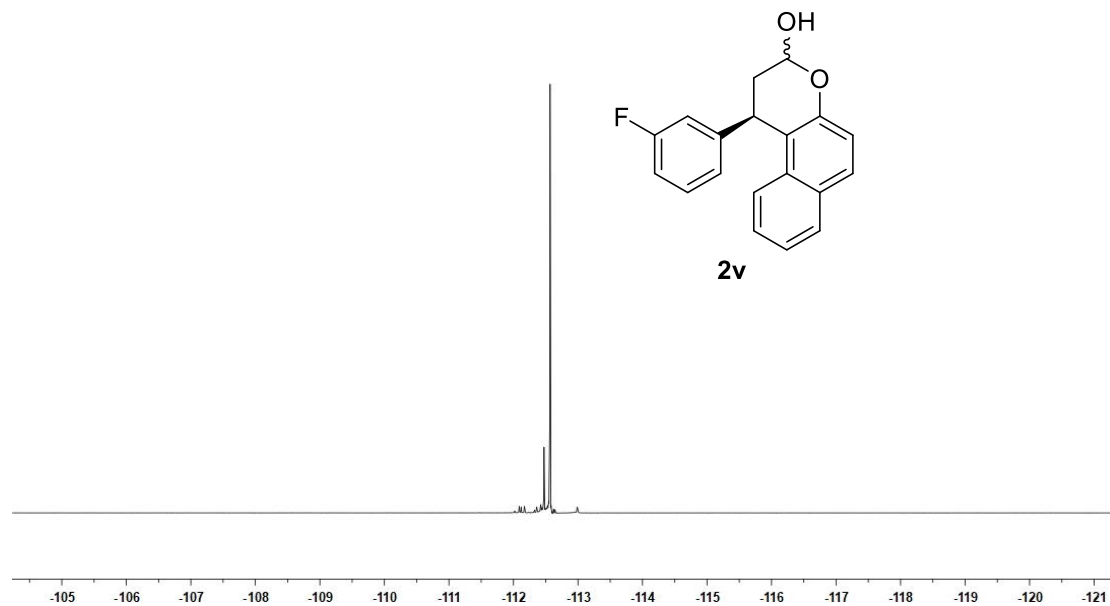

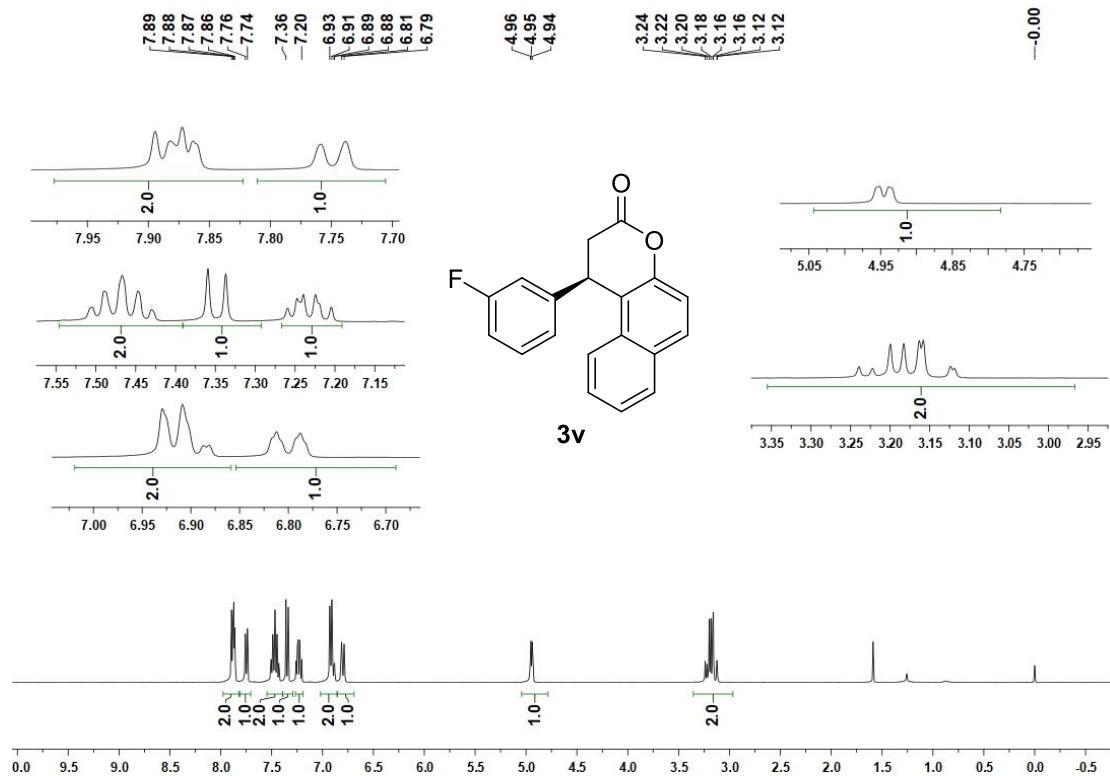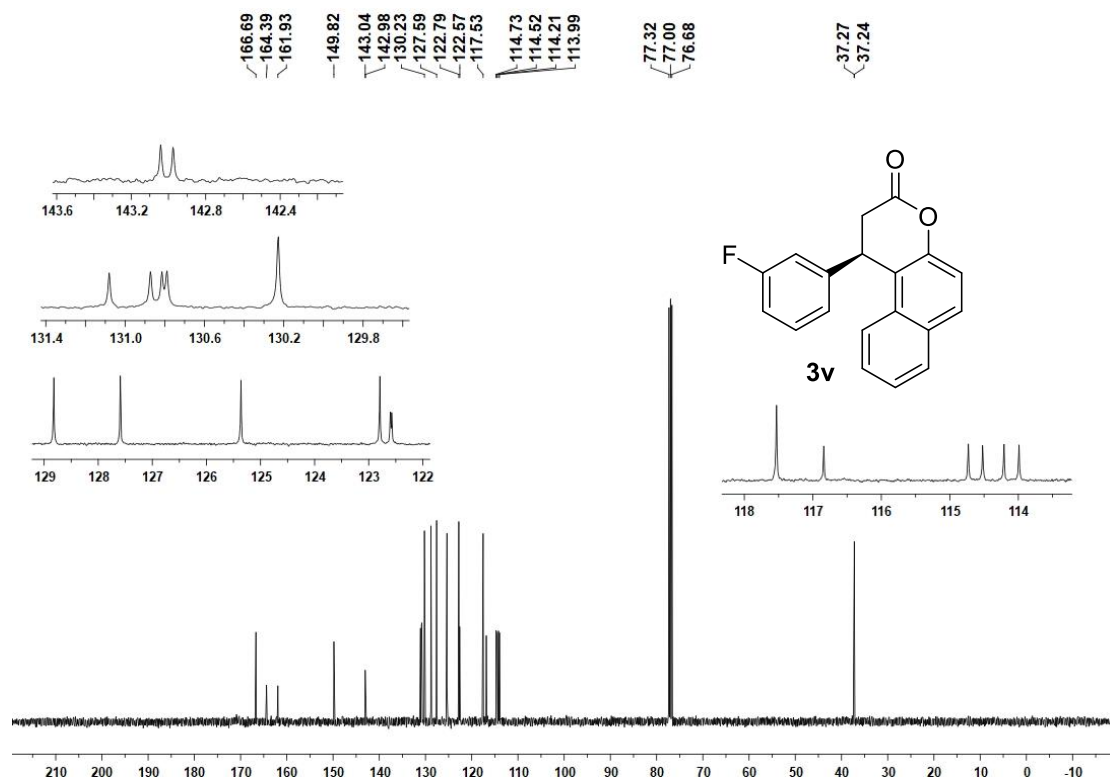

--111.67

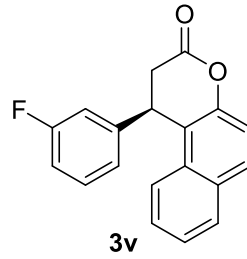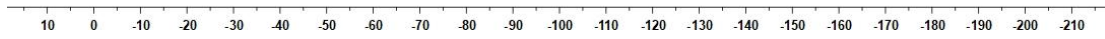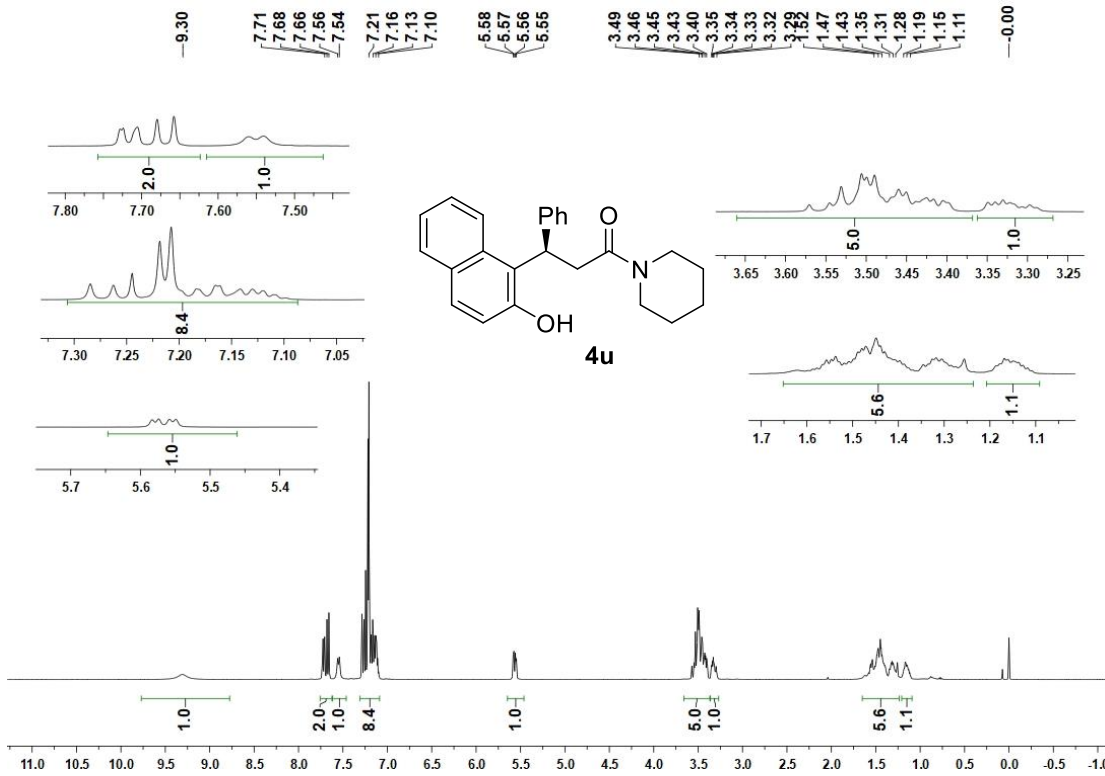

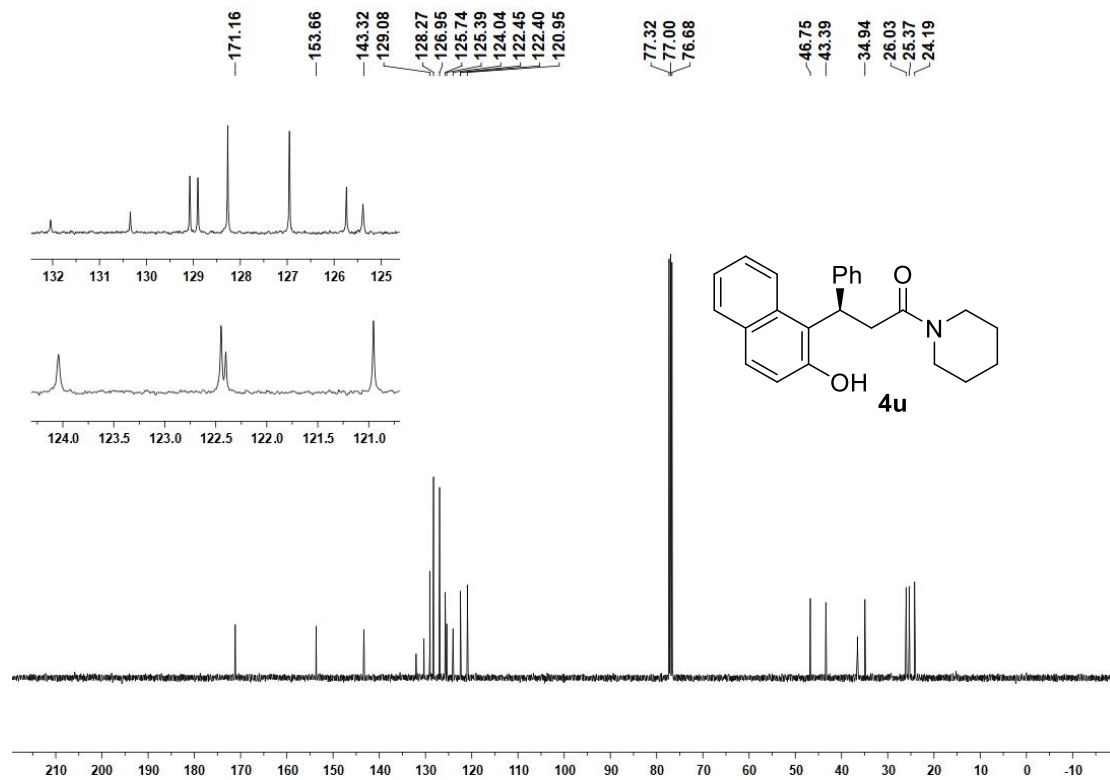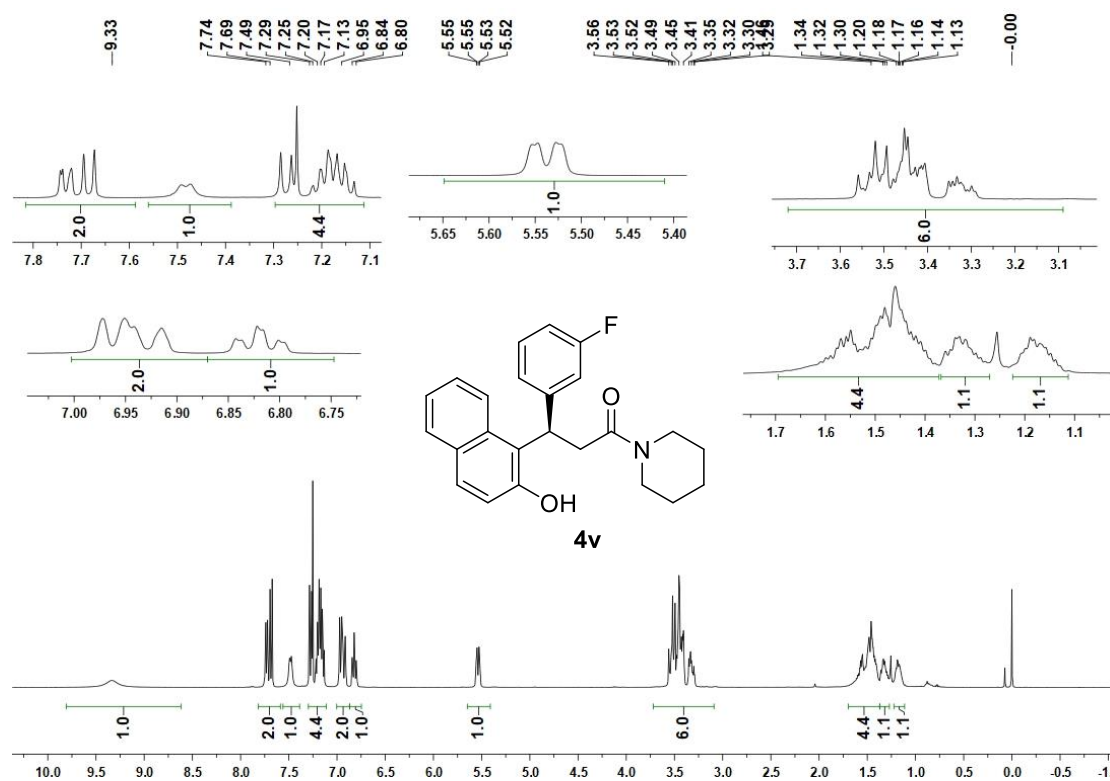



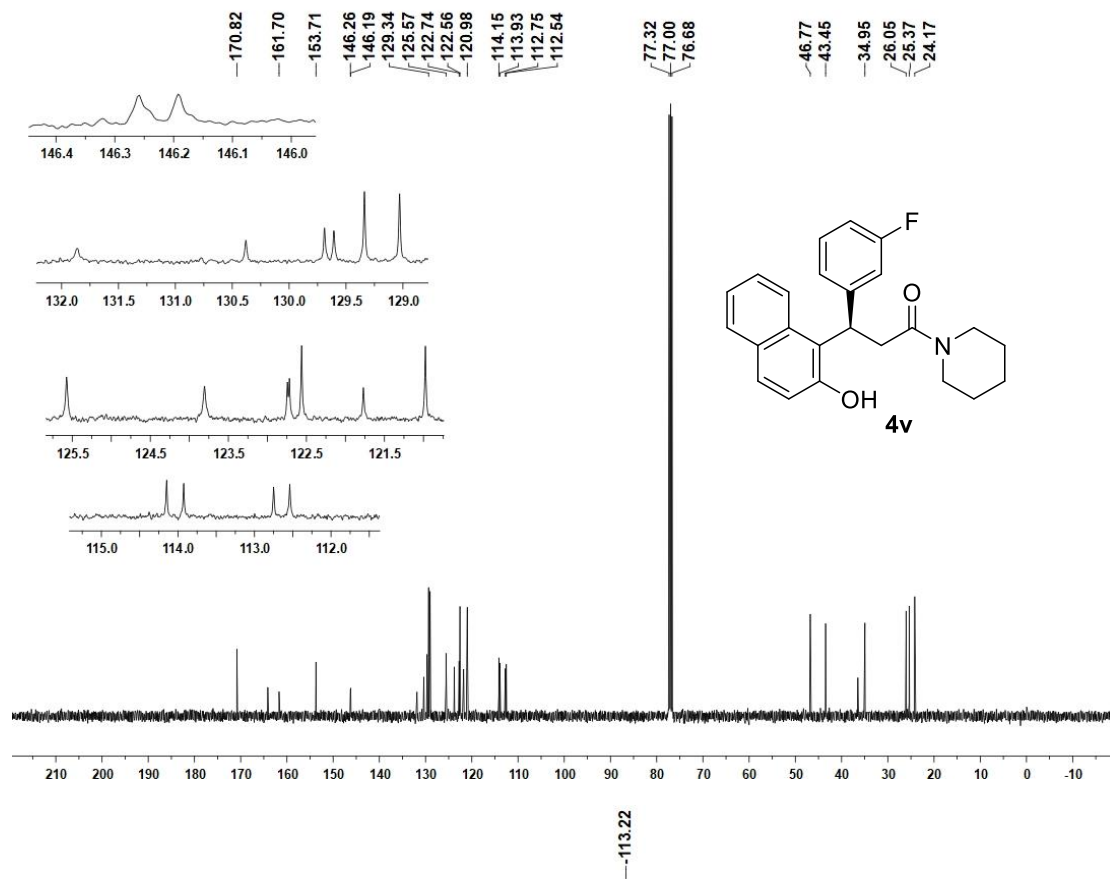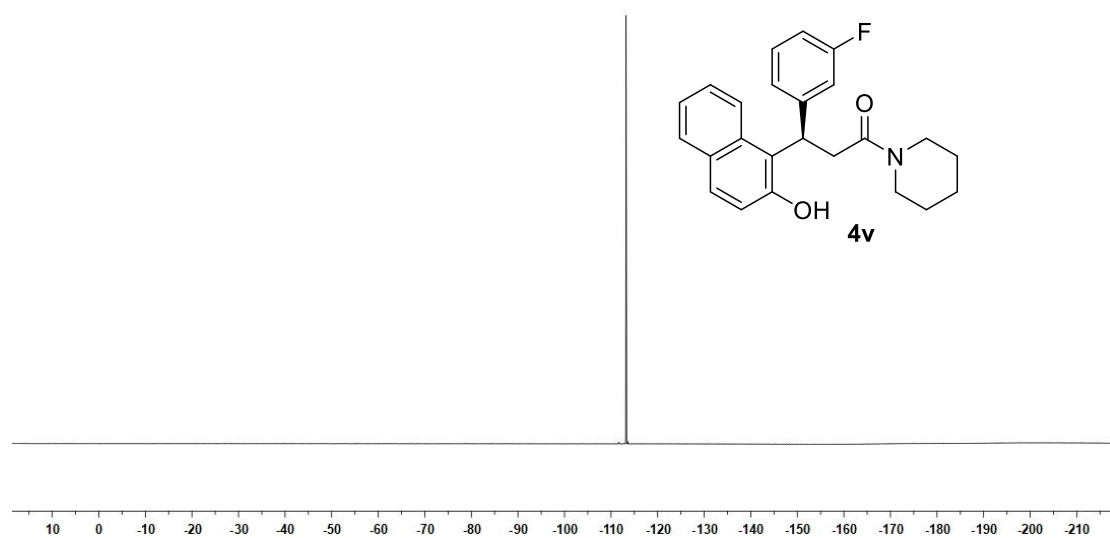

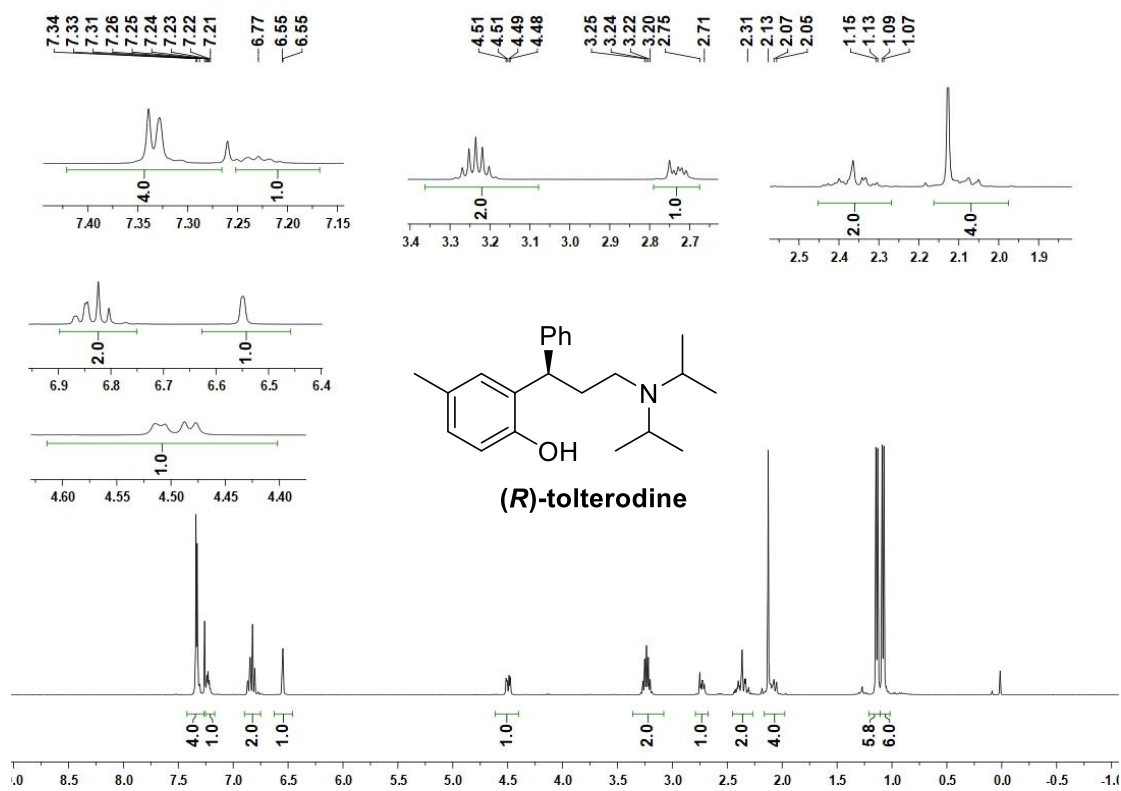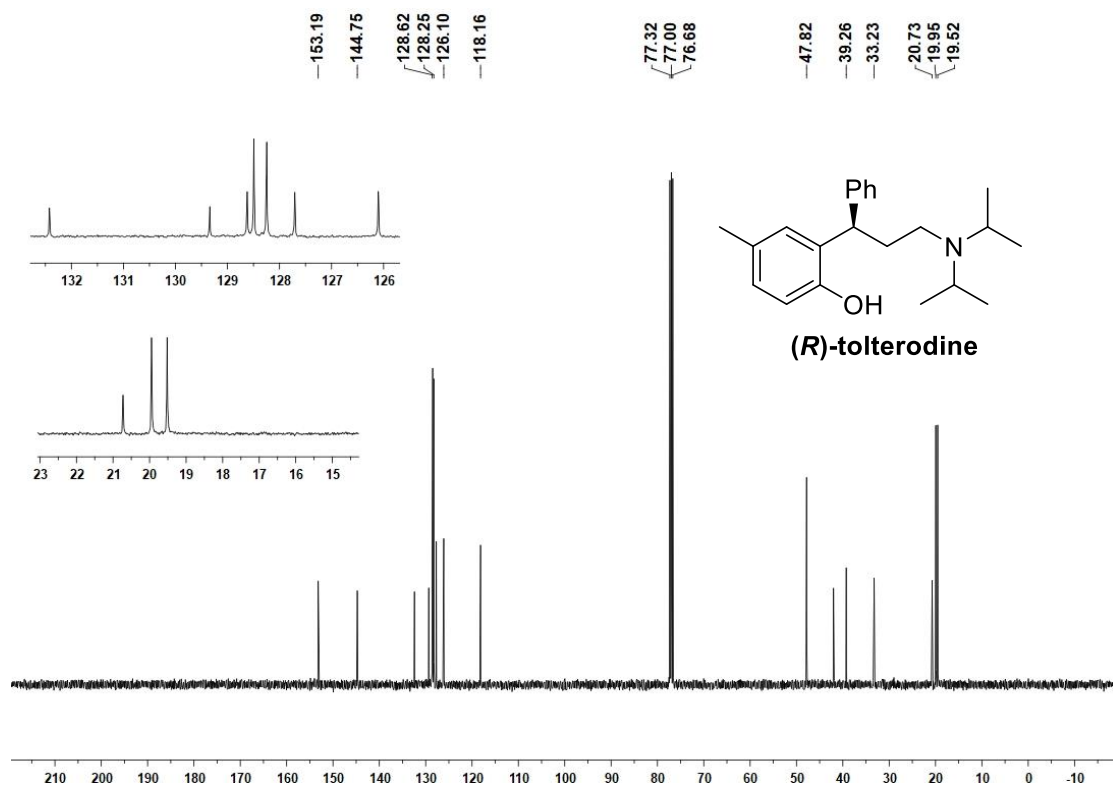

## 12. Copies of CD spectra for in CH<sub>2</sub>Cl<sub>2</sub>

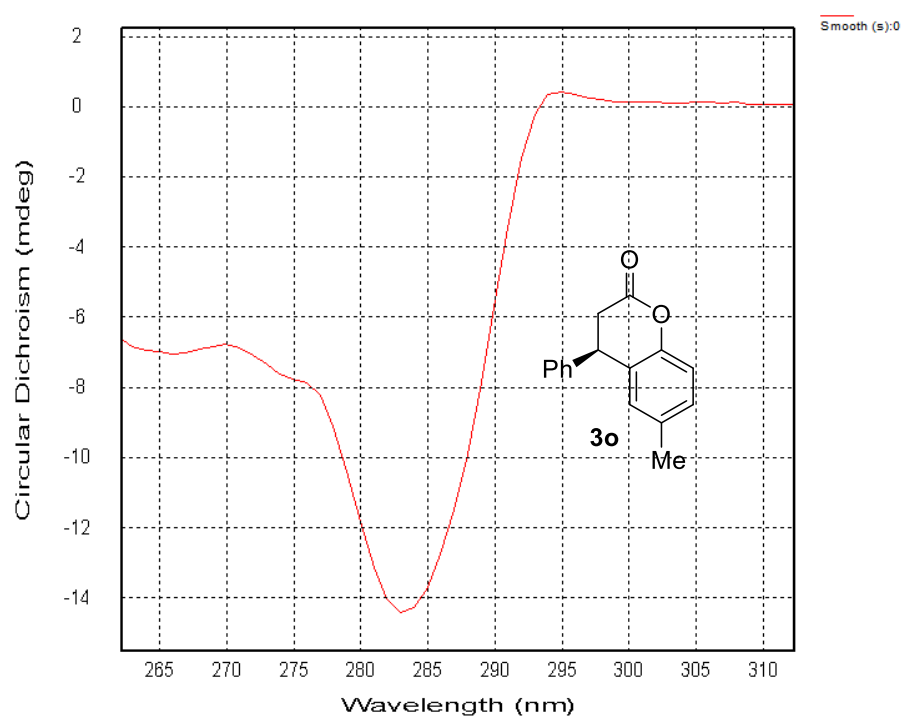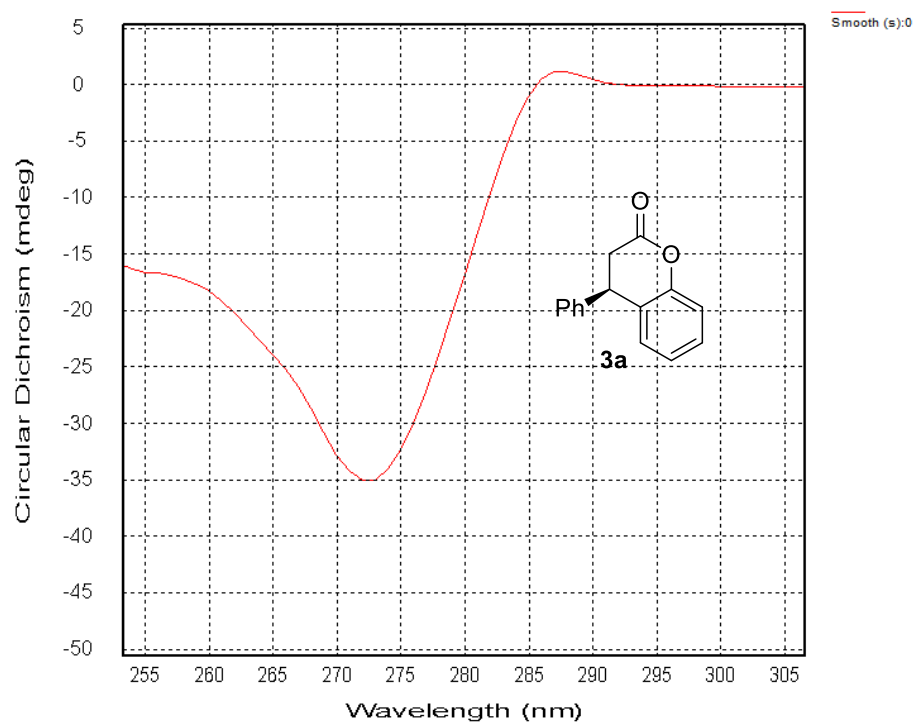

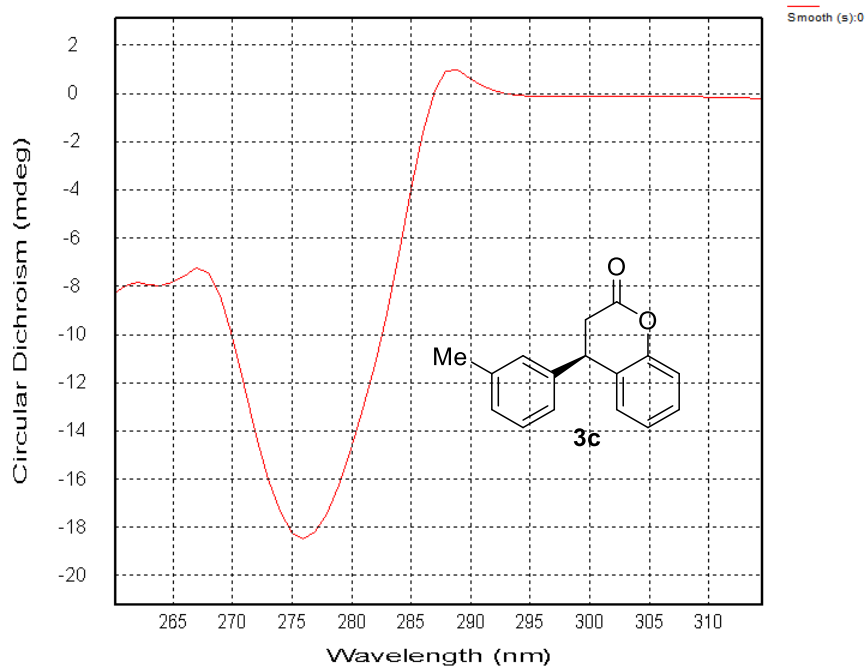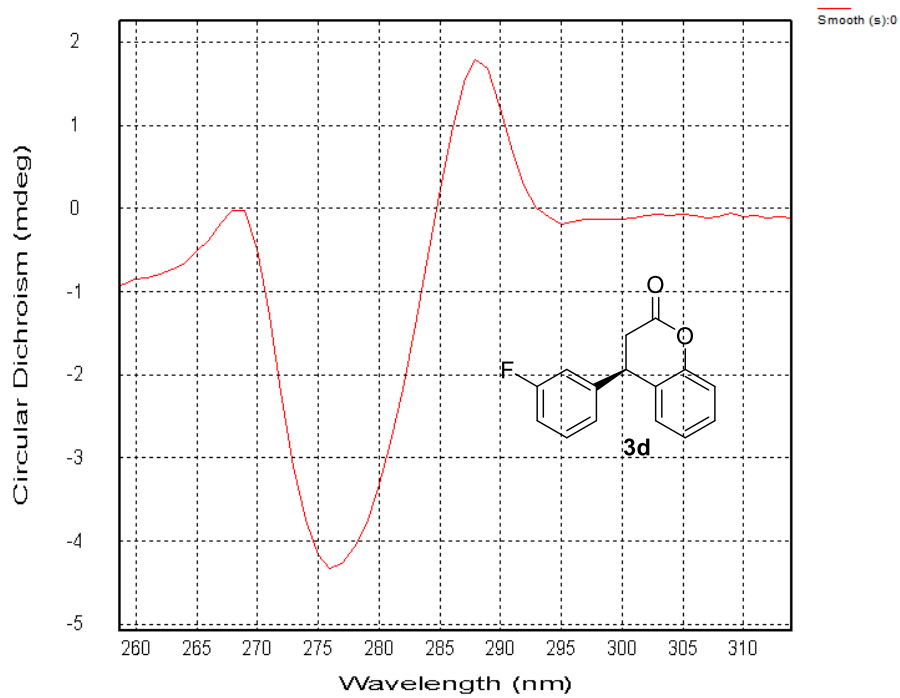

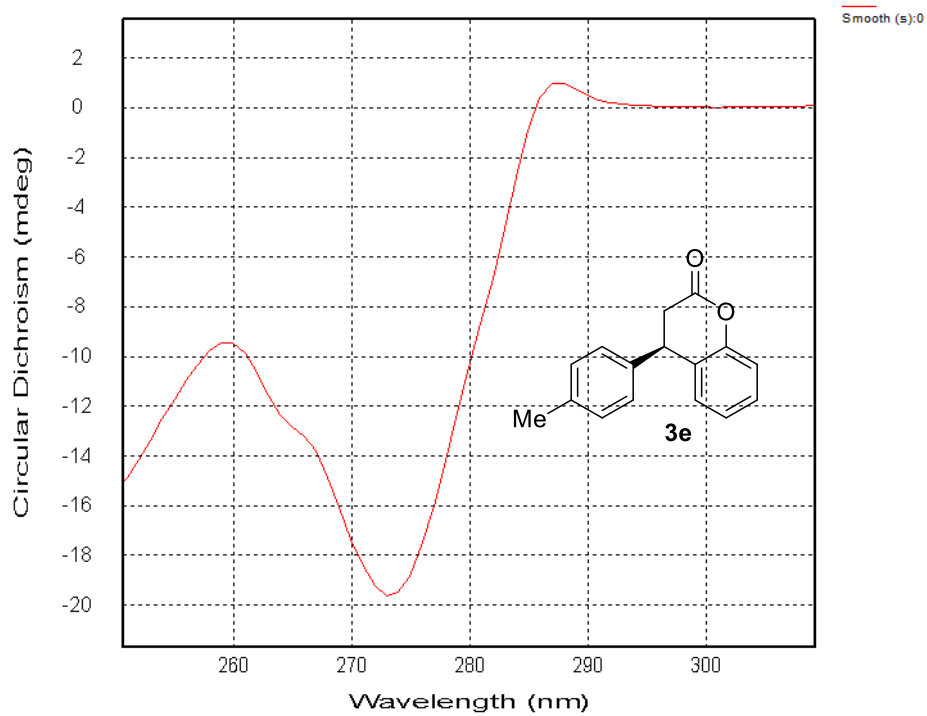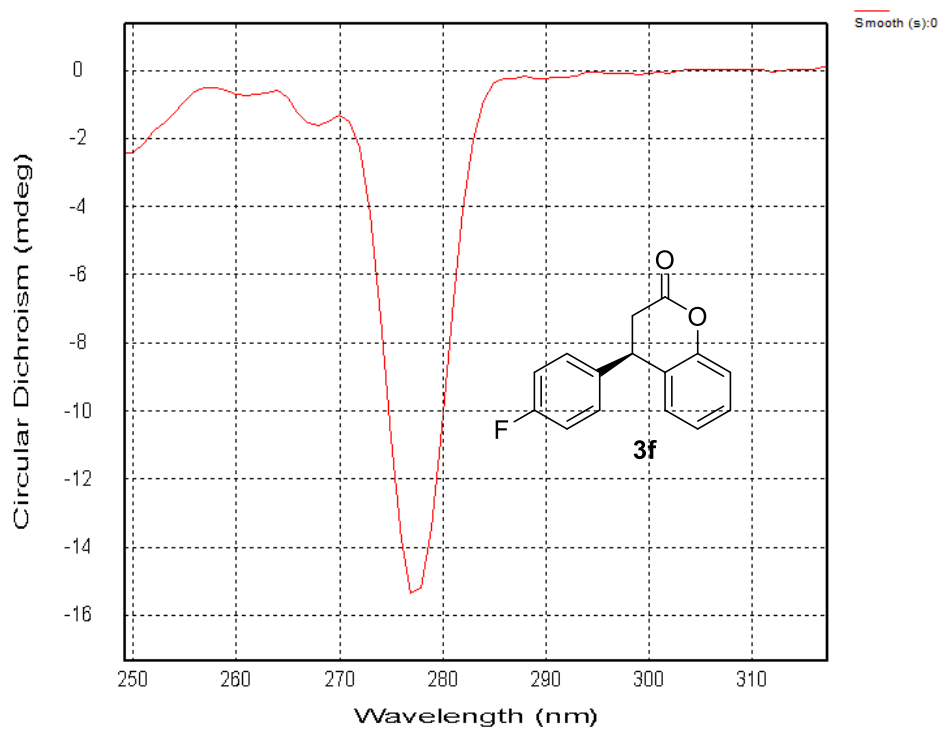

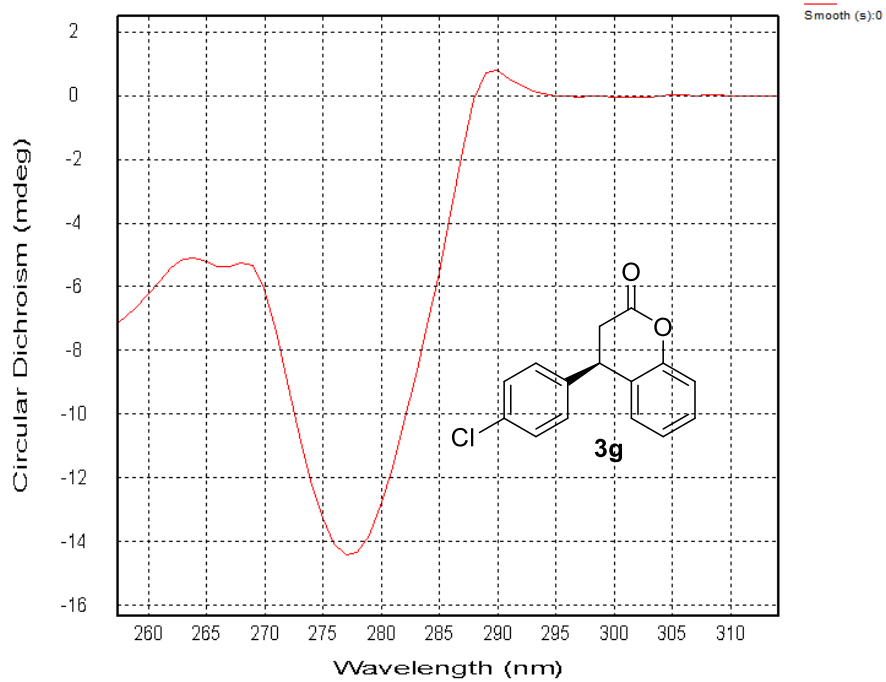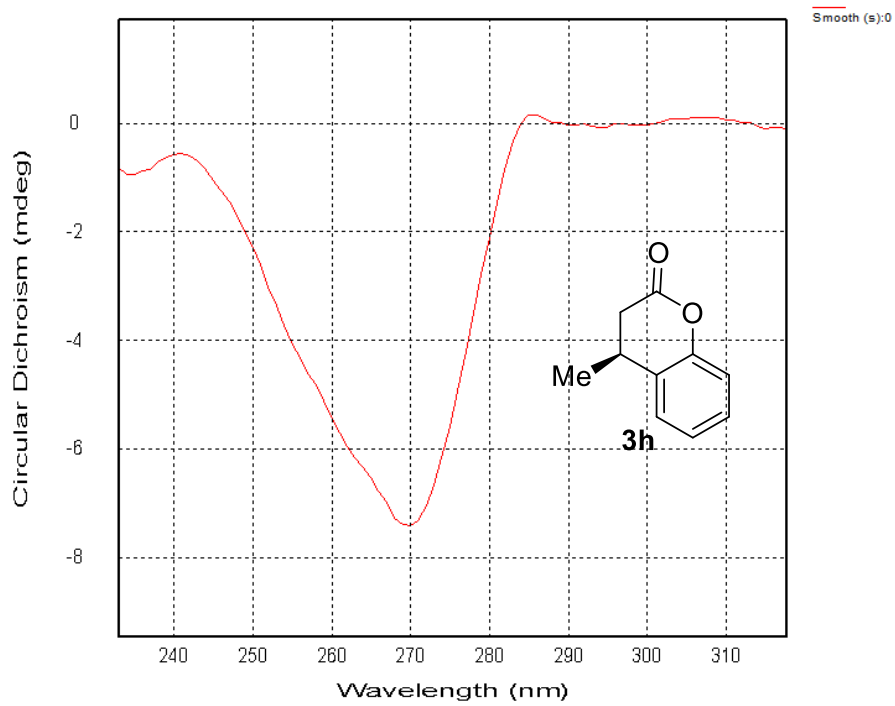

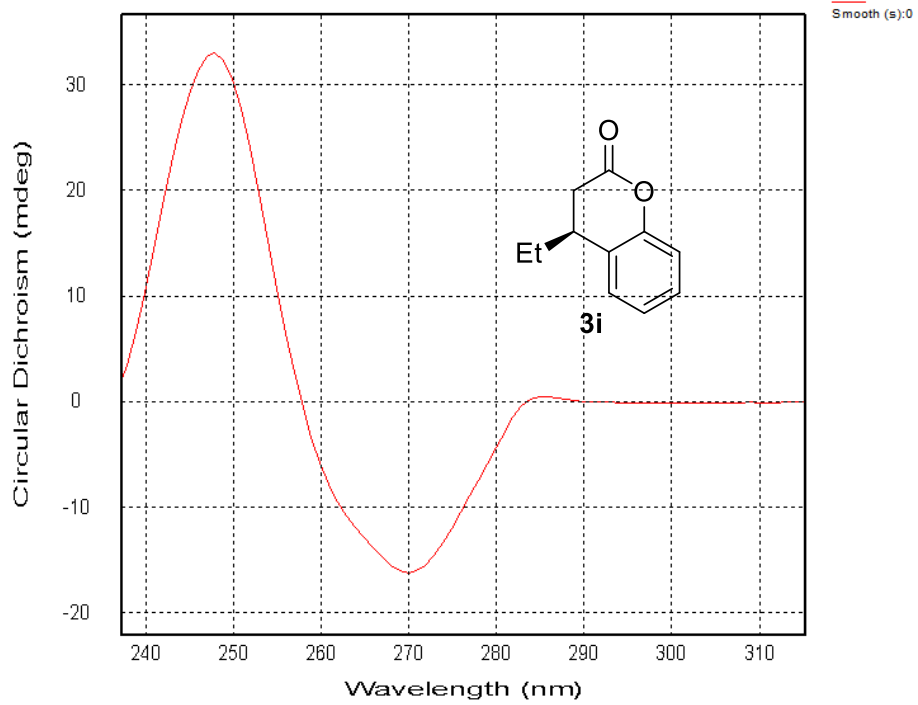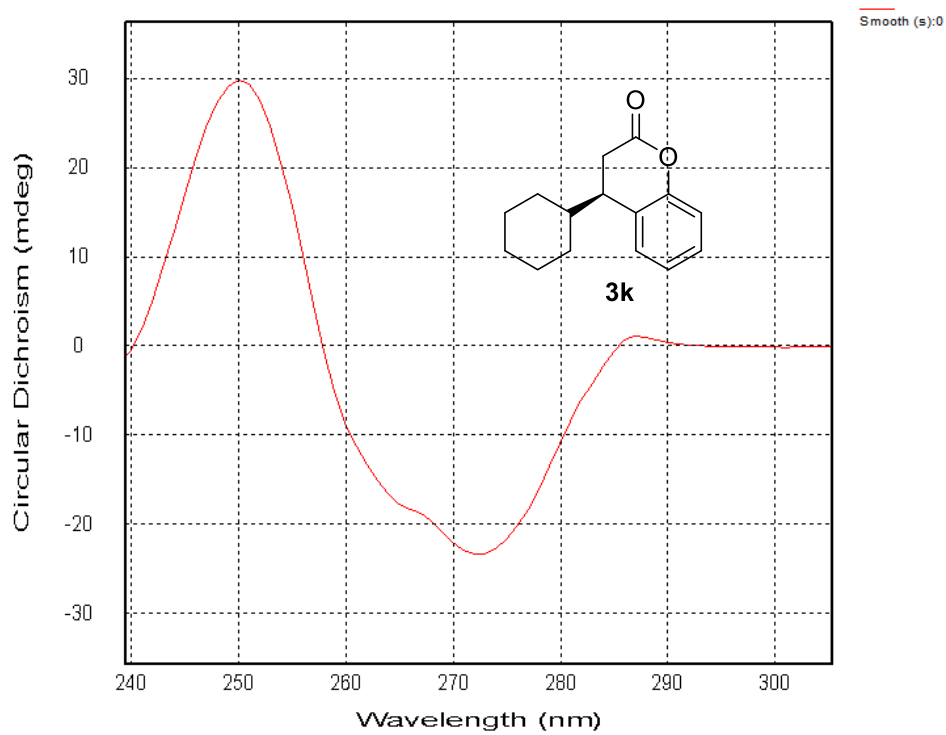

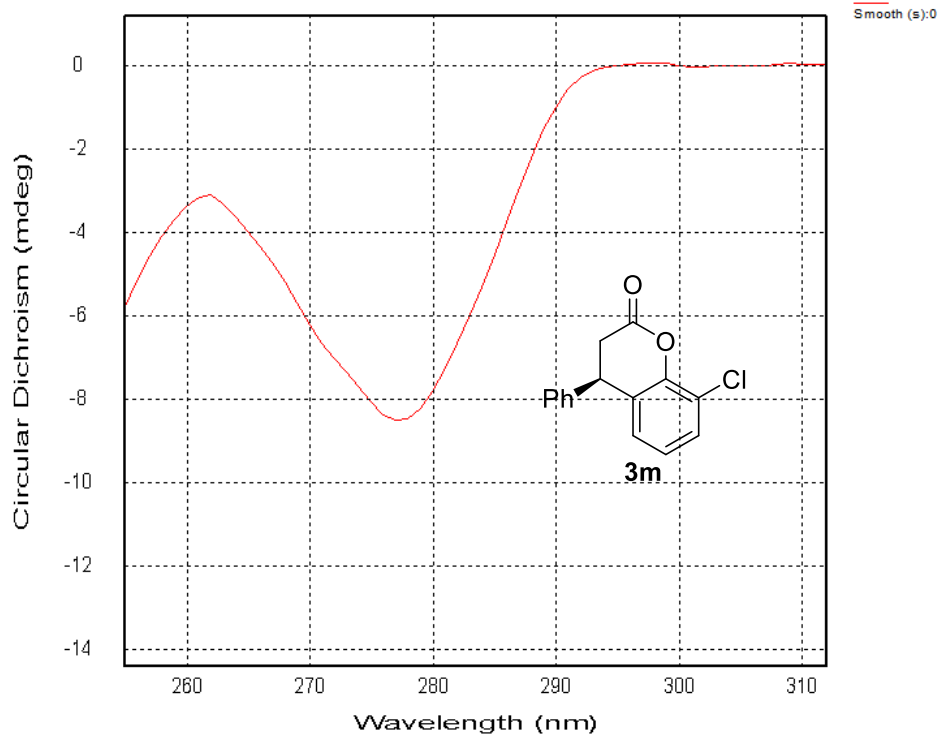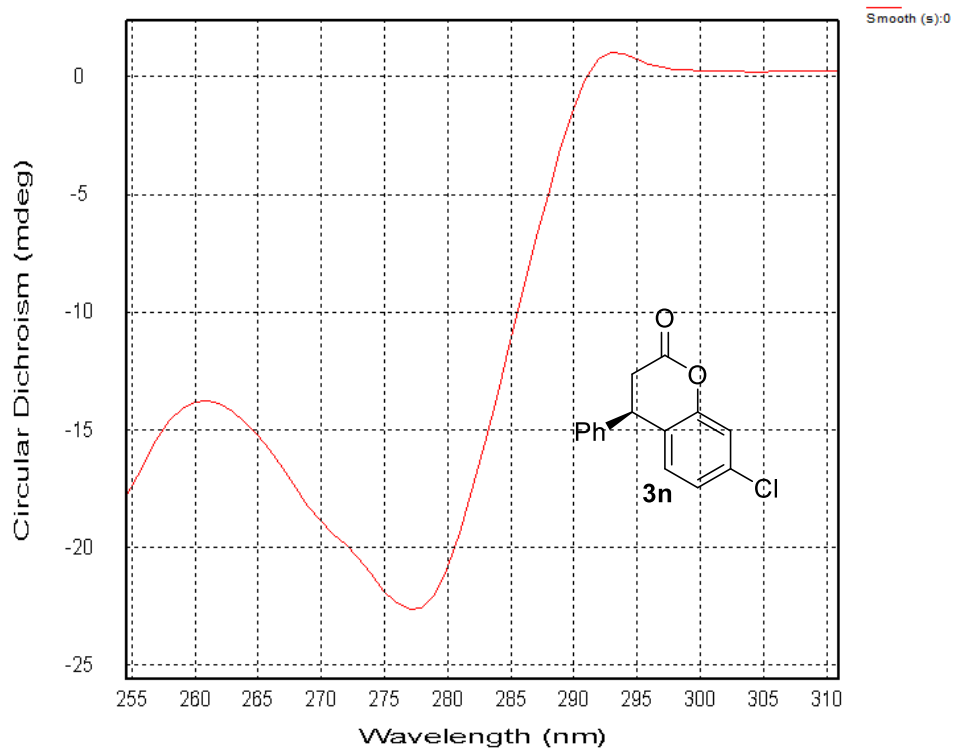



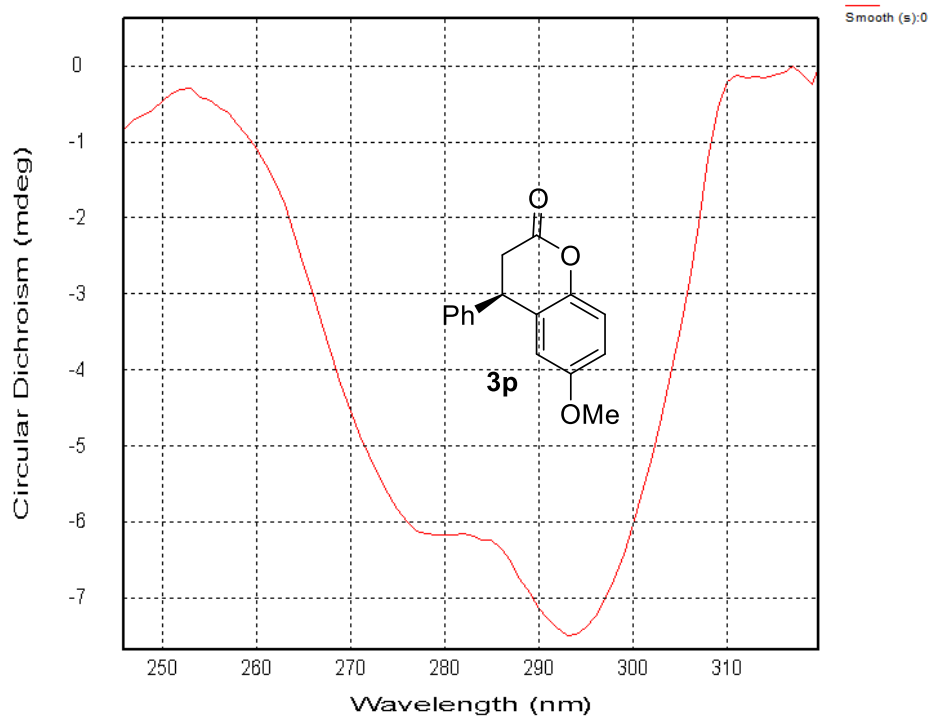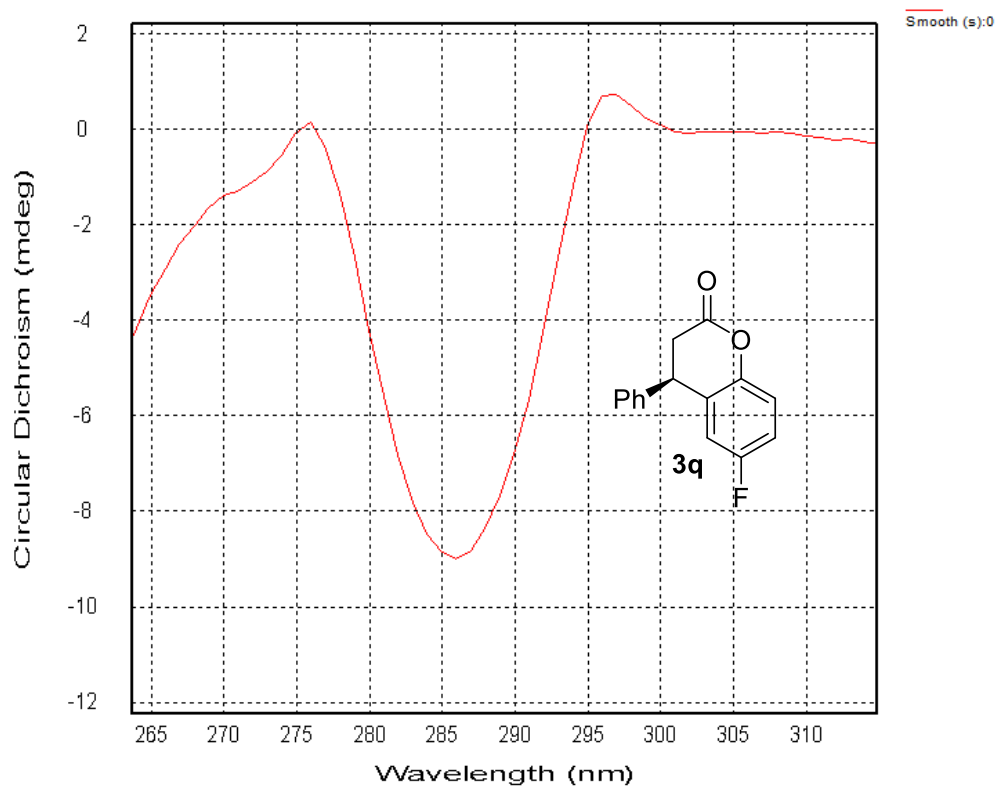

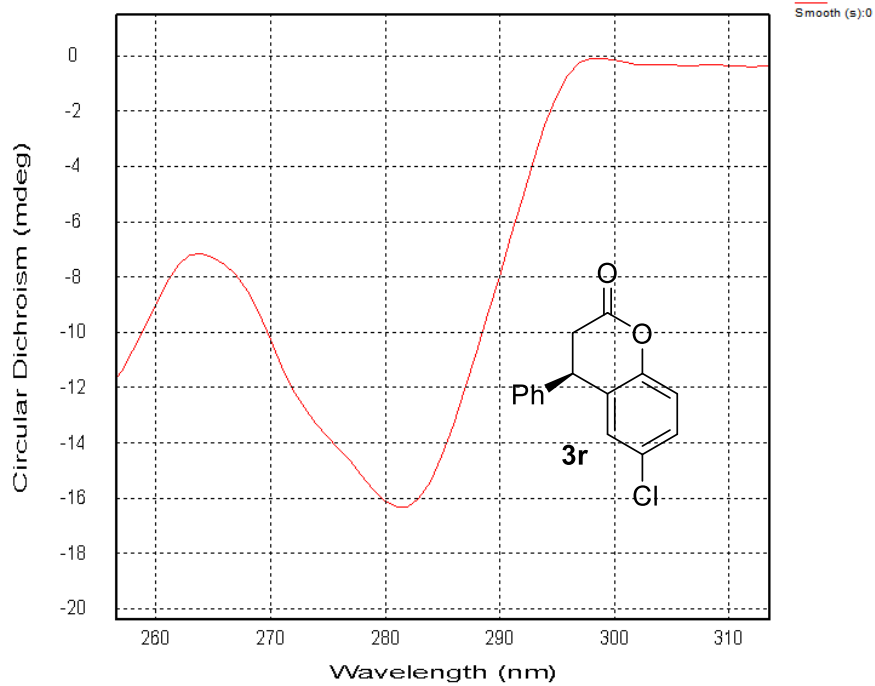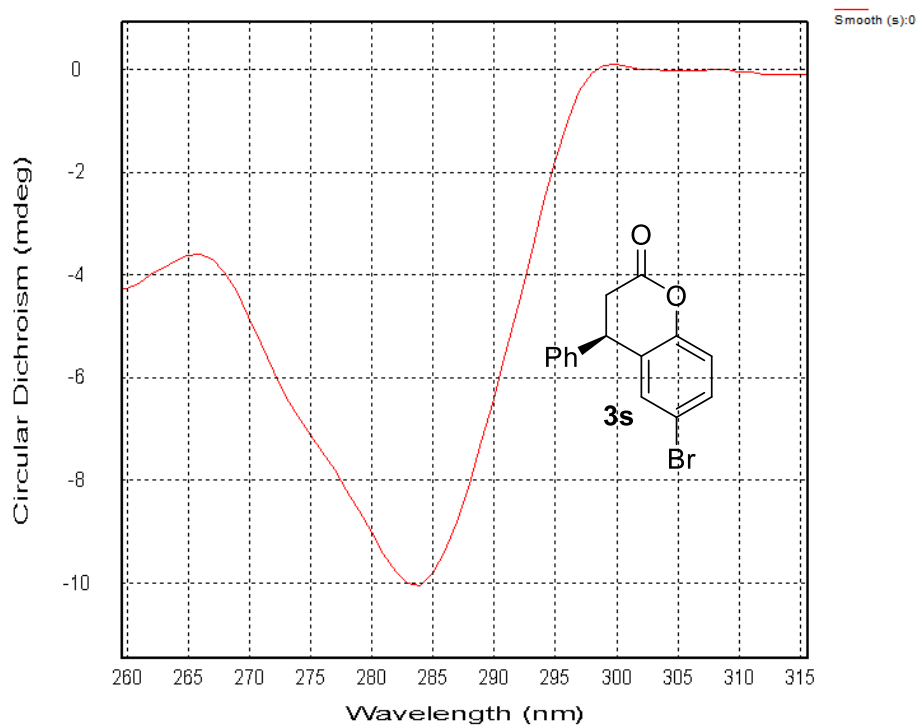

### 13. References

- 1 Y. H. Wen, X. Huang, J. L. Huang, Y. Xiong, B. Qin and X. M. Feng, *Synlett*, 2005, **16**, 2445.
- 2 Y. Okimoto, S. Sakaguchi and Y. Ishii, *J. Am. Chem. Soc.*, 2002, **124**, 1590.
